# Supplementary material for: Acyl Migration versus Epoxidation in Gold Catalysis: Facile, Switchable, and Atom‐Economic Synthesis of Acylindoles and Quinoline Derivatives
Source: PubMed Central journal article supplement — Angew Chem Int Ed Engl. 2019 Nov 26;59(1):471–8. doi: 10.1002/anie.201912334 (PMC6972584; doi:10.1002/anie.201912334), 2019-11-26
Supplement: ANIE-59-471-s001.pdf [file ANIE-59-471-s001.pdf]

Supporting Information

**Acyl Migration versus Epoxidation in Gold Catalysis: Facile, Switchable, and Atom-Economic Synthesis of Acylindoles and Quinoline Derivatives**

*Xianhai Tian<sup>+</sup>, Lina Song<sup>+</sup>, Kaveh Farshadfar, Matthias Rudolph, Frank Rominger, Thomas Oeser, Alireza Ariafard,\* and A. Stephen K. Hashmi\**

anie\_201912334\_sm\_miscellaneous\_information.pdf

## Contents

|                                                                                                       |     |
|-------------------------------------------------------------------------------------------------------|-----|
| 1. General Methods.....                                                                               | 1   |
| 2. Experiment Procedures.....                                                                         | 2   |
| 3. Mechanistic Study.....                                                                             | 5   |
| 4. Characterization Data.....                                                                         | 7   |
| 5. References.....                                                                                    | 32  |
| 6. NMR Spectra.....                                                                                   | 34  |
| 7. Solid State Molecular Structures of <b>3y</b> , <b>4b</b> , <b>5b</b> , <b>6a</b> and <b>6b</b> .. | 112 |
| 8. Computational Details.....                                                                         | 127 |

# 1. General Methods

Chemicals were purchased from commercial suppliers and used as delivered. The reagents **1**,<sup>1</sup> **2**<sup>2</sup> have been prepared according to the literature. Dry solvents were dispensed from the solvent purification system MB SPS-800. Deuterated solvents were bought from Euriso-Top. NMR spectra were, if not mentioned otherwise, recorded at room temperature on the following spectrometers: Bruker Avance-III-300, Bruker Avance III 400, and Bruker Avance-III-500. Chemical shifts are given in ppm and coupling constants in Hz. The following abbreviations were used for <sup>1</sup>H NMR spectra to indicate the signal multiplicity: s (singlet), brs (broad singlet), d (doublet), t (triplet), q (quartet), quint (quintet), sext (sextet), sept (septet) and m (multiplet) as well as combinations of them. When combinations of multiplicities are given the first character noted refers to the biggest coupling constant. All <sup>13</sup>C NMR spectra were measured with <sup>1</sup>H-decoupling. The multiplicities mentioned in these spectra [s (singlet, quaternary carbon), d (doublet, CH-group), t (triplet, CH<sub>2</sub>-group), q (quartet, CH<sub>3</sub>-group)] were determined by DEPT135 spectra. Mass spectra (MS and HRMS) were determined at the chemistry department of the University of Heidelberg under the direction of Dr. J. Gross. EI<sup>+</sup>-spectra were measured on a JOEL JMS-700 spectrometer. For EI<sup>+</sup>-, ESI<sup>+</sup>-, ESI<sup>-</sup>- or DART<sup>+</sup>-spectra a Bruker Apex-Qu FT-ICR-MS spectrometer was applied. Infrared Spectroscopy (IR) was processed on an FT-IR Bruker (IF528), IR Perkin Elmer (283) or FT-IR Bruker Vector 22. The solvent or matrix is denoted in brackets. For the most significant bands the wave number  $\nu$  (cm<sup>-1</sup>) is given. X-ray crystal structure analyses were measured at the chemistry department of the University of Heidelberg under the direction of Dr. F. Rominger and T. Oeser on a Bruker Smart CCD or Bruker APEX-II CCD instrument using Mo-K $\alpha$ -radiation. Diffraction intensities were corrected for Lorentz and polarization effects. An empirical absorption correction was applied using SADABS based on the Laue symmetry of reciprocal space. Heavy atom diffractions were solved by direct methods and refined against F<sub>2</sub> with full matrix least square algorithm. Hydrogen atoms were either isotropically refined or calculated. The structures were solved and refined by Dr. F. Rominger and T. Oeser using the SHELXTL software package. Gas Chromatography / Mass Spectrometry (GC/MS) spectra were measured on two different hardware systems: 1. HP 5972 Mass Selective Detector, coupled with a HP 5890 SERIES II plus gas chromatograph. 2. Agilent 5975C Mass Selective Detector, coupled with an Agilent 7890A gas chromatograph. In both cases, as a capillary column, an OPTIMA 5 cross-linked Methyl Silicone column (30 m x 0.32 mm, 0.25  $\mu$ m) was employed and helium was used as the carrier gas. Gas Chromatography (GC) was carried out on a HP 5890 SERIES II plus gas chromatograph. As a capillary column, an OPTIMA 5 cross-linked Methyl Silicone column (30 m x 0.32 mm, 0.25  $\mu$ m) was employed and nitrogen was used as the carrier gas. Melting Points were measured in open glass capillaries in a Büchi melting point apparatus (according to Dr. Tottoli) and were not calibrated. Flash Column Chromatography was accomplished using Silica gel 60 (0.04 - 0.063 mm / 230 - 400 mesh ASTM) purchased from Aldrich or Aluminium oxide (neutral or basic) purchased from Aldrich. As eluents, mixtures of petroleum ether (PE), ethyl acetate (EA) were used. Analytical Thin Layer Chromatography (TLC) was carried out on precoated Macherey-Nagel POLYGRAM® SIL G/UV254 or POLYGRAM® ALOX N/UV254 plastic sheets. Detection was accomplished using UV-light (254 nm), KMnO<sub>4</sub> (in 1.5 M Na<sub>2</sub>CO<sub>3</sub> (aq.)), molybdatophosphoric acid (5% in ethanol), vanillin/H<sub>2</sub>SO<sub>4</sub> (in ethanol) or

anisaldehyde/HOAc (in ethanol). IUPAC names of the compounds described in the experimental section were determined with the program ACDLabs 12.0<sup>®</sup>

## 2. Experiment Procedures

**General procedure 1: Synthesis of substituted anthranils 1a-1k (1j is commercially available)**

**Condition A<sup>1a</sup>:**

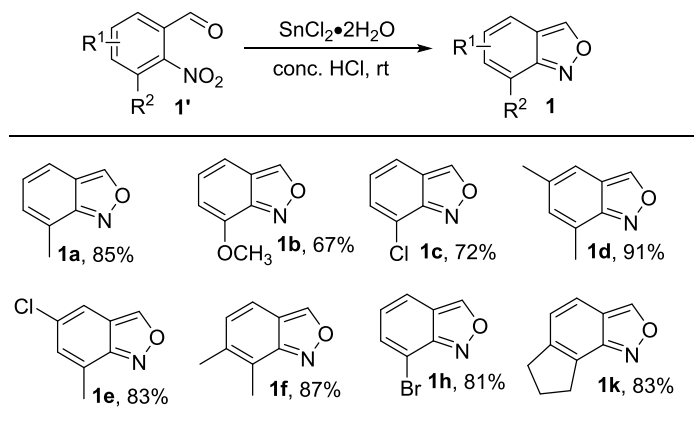

A round bottom flask equipped with a magnetic stirrer bar was charged with the substituted 2-nitroacylbenzene (1.00 mmol) in conc. HCl (3 ml). SnCl<sub>2</sub>·2H<sub>2</sub>O (4 mmol) was added and the reaction was stirred at 10 °C for 30 min. The reaction was quenched with saturated NaHCO<sub>3</sub> (20 ml), and filtered. The aqueous phase was extracted with EtOAc (3 × 10 mL) and the organic portions were combined, washed with H<sub>2</sub>O (20 mL), saturated aqueous NaCl (20 mL), dried over Na<sub>2</sub>SO<sub>4</sub>, filtered and concentrated. The residue was purified by column chromatography (Silica gel, PE/EtOAc) to provide the title compound in 67-91% yield.

**Condition B<sup>1b</sup>:**

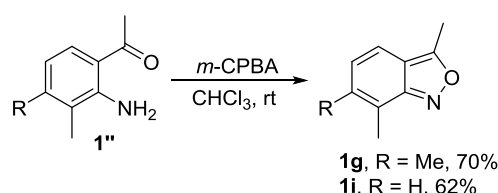

At room temperature, to a solution of substituted 2-acetylaniline **1''** (1 mmol) in chloroform (15 mL) was added *m*-CPBA (493 mg of 70% purity, 2 mmol) slowly. After a four-hour stirring, the resulting mixture was washed with 0.1 M NaHCO<sub>3</sub> (2 × 10 mL). The organic layer was dried over anhydrous Na<sub>2</sub>SO<sub>4</sub>, filtered and concentrated. The residue was purified by column chromatography (Silica gel, PE/EtOAc) to give the desired product in 62-70% yield.

**General procedure 2: Gold(III)-catalyzed [3+2] annulations with divergent acyl migrations for the synthesis of 3 and 4**

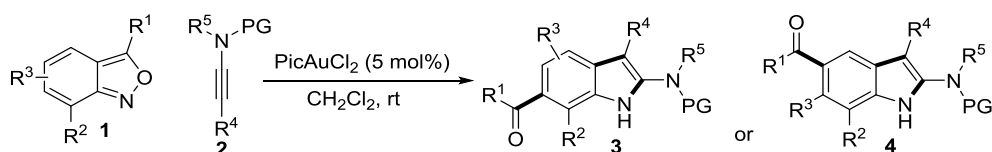

A small glass vial (3 mL in volume) equipped with a magnetic stirrer bar was charged with **1** (0.2 mmol) and **2** (0.24 mmol), and to this mixture was added dry DCM (2.0 mL) and PicAuCl<sub>2</sub> (5 mol%,



3.9 mg). The vial was then sealed with a plastic screw cap. The reaction mixture was stirred at room temperature for 12 h (for product **3ab**, the reaction temperature is 50 °C). The solvent was removed under reduced pressure, and the residue was purified by column chromatography (Silica gel, PE/EtOAc) to give **3** or **4**.

### General procedure 3: Gold(I)-catalyzed epoxidations for the synthesis of **5**, **6**, **7** and **10**

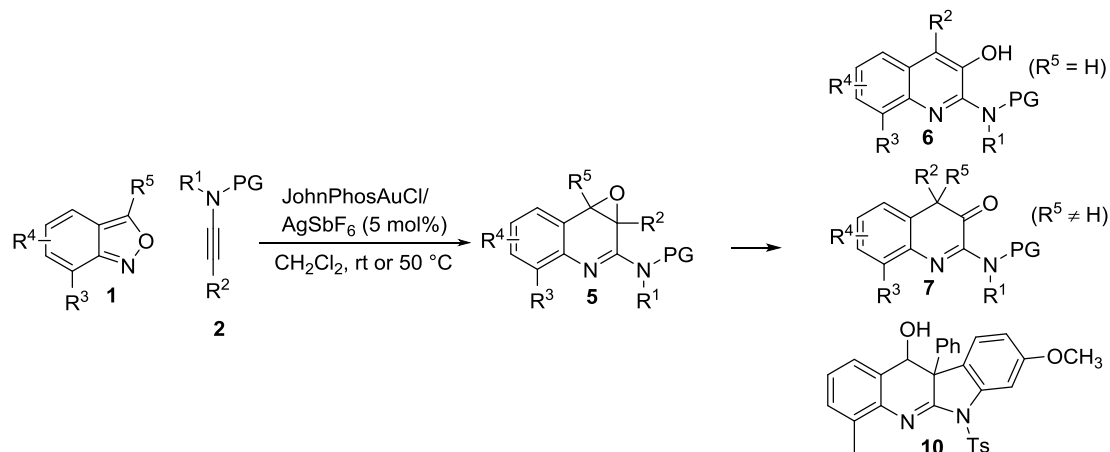

A small glass vial (3 mL in volume) equipped with a magnetic stirrer bar was charged with JohnPhosAuCl (5 mol%, 5.3 mg) and AgSbF<sub>6</sub> (5 mol%, 3.4 mg), and to this mixture was added dry DCM (0.5 mL). The resulting mixture was stirred at room temperature for 5 min. Then **1** (0.24 mmol) and **2** (0.20 mmol) dissolved in dry DCM (1.5 mL) were added slowly. The vial was then sealed with a plastic screw cap. The reaction mixture was stirred at room temperature for 12 h (for product **5c**, **5h-j**, **6c** and **7a-b**, the reaction temperature is 50 °C, 10.6 mg JohnPhosAuCl, 6.8 mg AgSbF<sub>6</sub>). The solvent was removed under reduced pressure, and the residue was purified by column chromatography (Silica gel, PE/EtOAc) to give compound **5**, **6**, **7** or **10**.

### Procedure 4: Gram-scale synthesis of **3a**

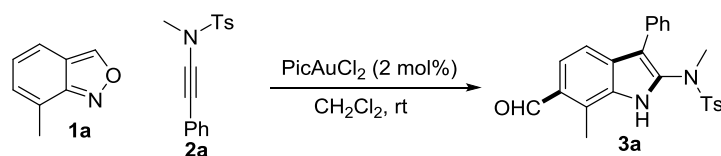

A round-bottom flask (50 mL in volume) equipped with a magnetic stirrer bar was charged with **1a** (532 mg, 4.0 mmol) and **2a** (1.37 g, 4.8 mmol), and to this mixture was added dry DCM (20 mL). PicAuCl<sub>2</sub> (32 mg, 2 mol%) was slowly added to this mixture. The reaction mixture was stirred at room temperature for 12 h. The solvent was removed under reduced pressure, and the residue was purified by column chromatography (Silica gel, PE/EtOAc) to give **3a** (1.39 g, 83%).

### Procedure 5: NaBH<sub>4</sub>-Mediated reduction of **3a**

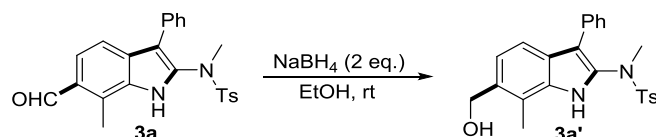

A sealed tube equipped with a magnetic stirrer bar was charged with **3a** (84 mg, 0.2 mmol) and 2 mL EtOH. After NaBH<sub>4</sub> (7.6 mg, 0.4 mmol) was added, the reaction was stirred at room temperature for 2 h and then quenched by H<sub>2</sub>O (5 mL). The resulting mixture was extracted with EtOAc (3 × 5 mL) and the organic portions were combined, washed with saturated aqueous NaCl (10 mL), dried

over NaSO<sub>4</sub>, filtered and reduced in vacuo. The residue was purified by column chromatography (Silica gel, hexane/EtOAc) to provide compound **3a'**.

**Procedure 6: LiAlH<sub>4</sub>-Mediated reduction of 3a**

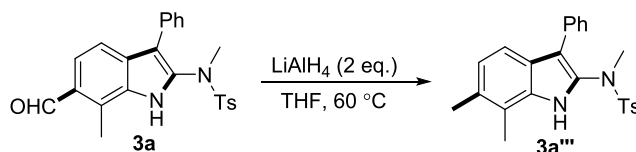

At 0 °C, to a solution of **3a** (84 mg, 0.2 mmol) in 2 mL THF was added LiAlH<sub>4</sub> (7.6 mg, 0.4 mmol) and the reaction was heated to 60 °C. After being stirred at this temperature for 24 h, the reaction was cooled down to 0 °C again and then quenched by H<sub>2</sub>O (5 ml, dropwisely added). The resulting mixture was extracted with EtOAc (3 × 5 mL). The organic portions were combined, washed with H<sub>2</sub>O (10 mL), saturated aqueous NaCl (10 mL), dried over NaSO<sub>4</sub>, filtered and reduced in vacuo. The residue was purified by column chromatography (Silica gel, hexane/EtOAc) to give compound **3a'''**.

**Procedure 7: Seyferth-Gilbert homologation of 3a**

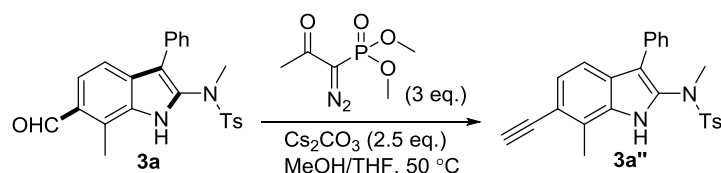

To the mixture of **3a** (84 mg, 0.2 mmol), Cs<sub>2</sub>CO<sub>3</sub> (163 mg, 0.5 mmol), MeOH (1 ml) and THF (1 ml) was added dropwise the dimethyl (1-diazo-2-oxopropyl)phosphonate (114 mg, 0.6 mmol) at 0 °C. Then, the reaction was stirred 6 h at room temperature. The mixture was washed with H<sub>2</sub>O (10 mL), and extracted with EtOAc (3 × 5 mL). The organic portions were combined and washed with saturated aqueous NaCl (10 mL), dried over NaSO<sub>4</sub>, filtered and reduced in vacuo. The residue was purified by column chromatography (SiO<sub>2</sub>, hexane/EtOAc) to provide **3a''**.

**Procedure 8: LiAlH<sub>4</sub>-Mediated reduction and deamination of 5b**

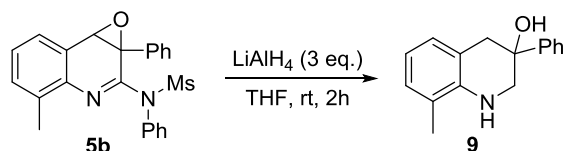

At 0 °C, to a solution of **5b** (81 mg, 0.2 mmol) in 2 mL THF was added LiAlH<sub>4</sub> (11.4 mg, 0.6 mmol) and the reaction was then moved to room temperature. After being stirred for 2 h, the reaction was cooled down to 0 °C again and then quenched by H<sub>2</sub>O (5 ml, dropwisely added). The resulting mixture was extracted with EtOAc (3 × 5 mL). The organic portions were combined, washed with H<sub>2</sub>O (10 mL), saturated aqueous NaCl (10 mL), dried over NaSO<sub>4</sub>, filtered and reduced in vacuo. The residue was purified by column chromatography (Silica gel, hexane/EtOAc) to give compound **9**.

### 3. Mechanistic Study

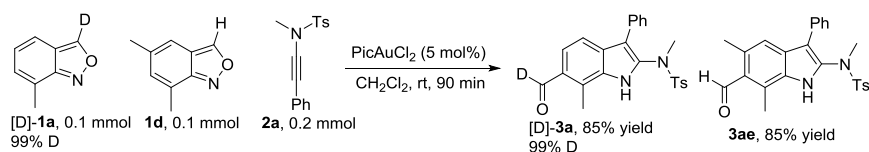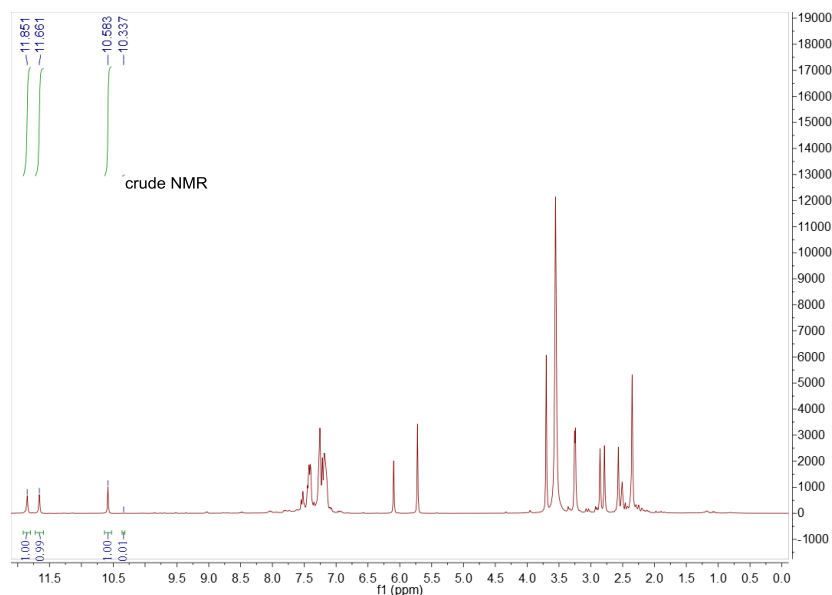

|                               |                  |                         |                  |                          |
|-------------------------------|------------------|-------------------------|------------------|--------------------------|
| <b>Acquisition Parameters</b> | Collision Energy | 0.0 eV                  | Calibration Date | Thu Jan 17 08:10:18 2019 |
| Broadband High Mass           | 2500.0 m/z       | Collision Gas Flow Rate | 0.6 L/sec        |                          |
| Broadband Low Mass            | 173.2 m/z        | Q1 Mass                 | 200.000 m/z      |                          |
| Accumulations                 | 16               | Q1 Resolution           | 7.5              |                          |

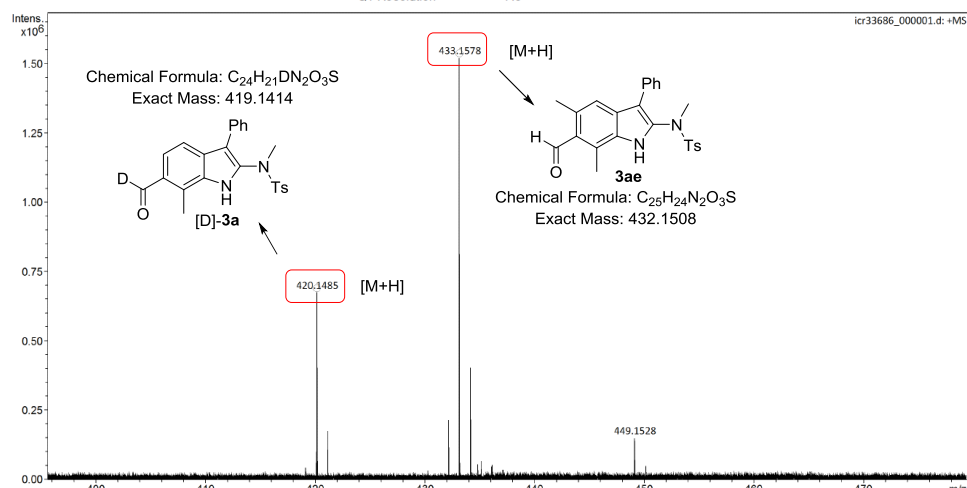

MS: [D]-**3a**: calcd.: 419 (100%), 420 (26%), 421 (4.5%); found: 419 (100%), 420 (26%), 421 (n.d.)

**3ae**: calcd.: 432 (100%), 433 (27%), 434 (4.5%); found: 432 (100%), 433 (26.5%), 434 (3.6%)

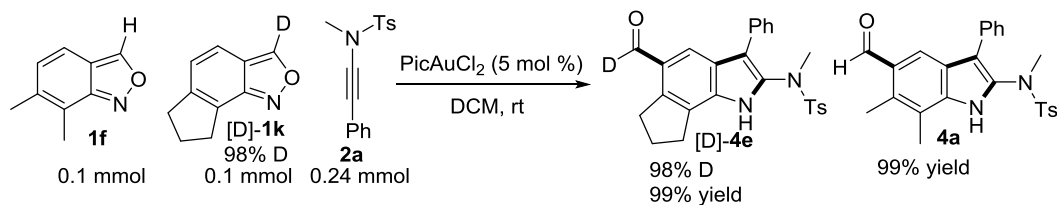

MS: [D]-**4e**: calcd.: 445 (100%), 446 (28.1%), 447 (4.5%); found: 445 (100%), 446 (28.9%), 447 (4.3%)

**4a**: calcd.: 432 (100%), 433 (27%), 434 (4.5%); found: 432 (100%), 433 (27%), 434 (5.0%)

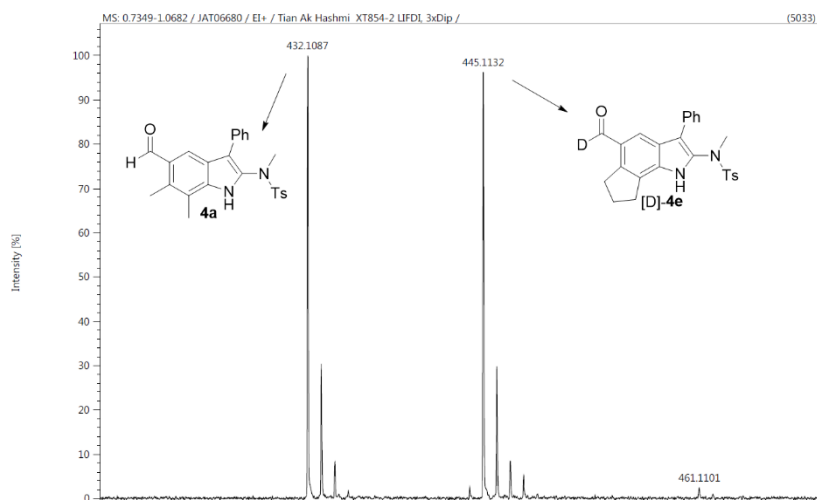

Crude  $^1\text{H}$  NMR of this crossover experiment:

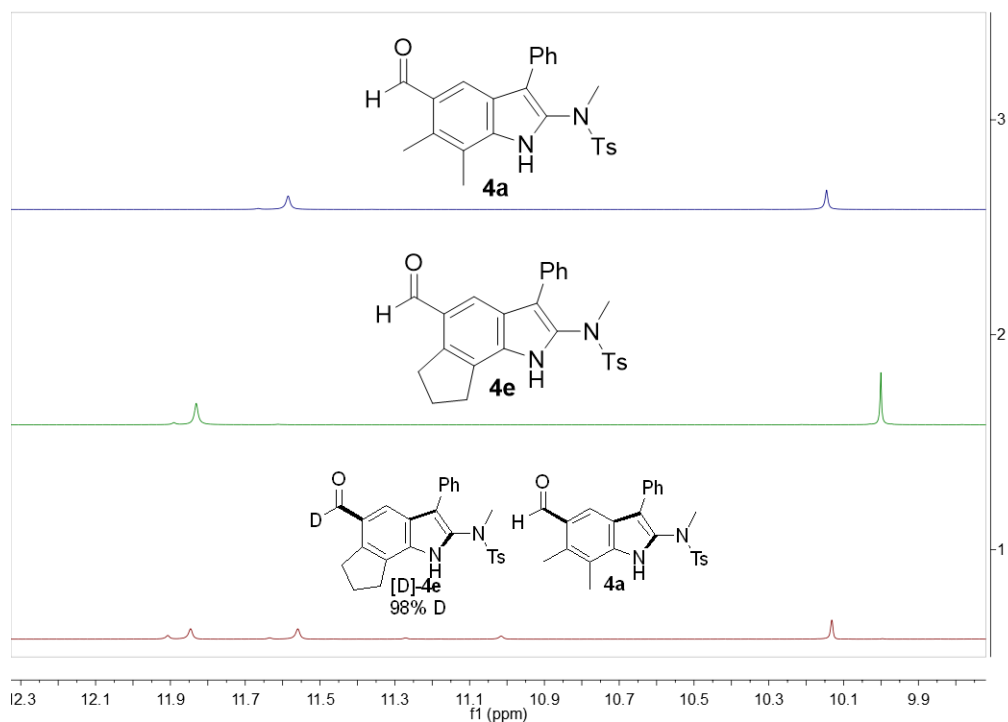

## 4. Characterization Data

Compounds **1a-c** were characterized in our previous report<sup>[3]</sup>

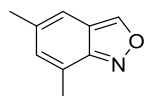

### 5,7-dimethylbenzo[c]isoxazole (**1d**)

Yield: 134 mg, 91%; colorless oil;  $R_f = 0.40$  (EA/PE = 1/20);  $^1\text{H NMR}$  (500 MHz,  $\text{CDCl}_3$ )  $\delta$  8.88 (s, 1H), 7.03 (s, 1H), 6.80 (s, 1H), 2.47 (s, 3H), 2.24 (s, 3H) ppm;  $^{13}\text{C NMR}$  (125 MHz,  $\text{CDCl}_3$ )  $\delta$  156.5 (s), 153.0 (d), 134.4 (s), 132.6 (d), 125.2 (s), 118.7 (s), 114.0 (d), 21.8 (q), 17.0 (q) ppm; IR (reflection)  $\tilde{\nu} = 3127, 3096, 3017, 2975, 2944, 2917, 2859, 2737, 2202, 1646, 1557, 1472, 1445, 1403, 1378, 1327, 1233, 1155, 1108, 1037, 1019, 977, 921, 876, 844, 793, 754, 613 \text{ cm}^{-1}$ ; HRMS (EI) ( $m/z$ )  $\text{C}_9\text{H}_9\text{NO}$  calcd for 147.0684, found 147.0680.

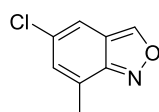

### 5-chloro-7-methylbenzo[c]isoxazole (**1e**)

Yield: 139 mg, 83%; colorless oil;  $R_f = 0.42$  (EA/PE = 1/20);  $^1\text{H NMR}$  (500 MHz,  $\text{CDCl}_3$ )  $\delta$  8.97 (s, 1H), 7.29 (s, 1H), 6.88 (d,  $J = 1.5 \text{ Hz}$ , 1H), 2.48 (s, 3H) ppm;  $^{13}\text{C NMR}$  (125 MHz,  $\text{CDCl}_3$ )  $\delta$  155.6 (s), 154.0 (d), 130.7 (d), 130.4 (s), 127.9 (s), 118.3 (s), 115.0 (d), 16.9 (q) ppm; IR (reflection)  $\tilde{\nu} = 3135, 3107, 2983, 2963, 2913, 2208, 1732, 1715, 1635, 1544, 1463, 1439, 1408, 1377, 1345, 1318, 1263, 1218, 1183, 1111, 1069, 1034, 985, 924, 895, 872, 856, 810, 759, 613 \text{ cm}^{-1}$ ; HRMS (EI) ( $m/z$ )  $\text{C}_8\text{H}_6^{35}\text{ClNO}$  calcd for 167.0138, found 167.0126.

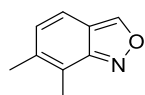

### 6,7-dimethylbenzo[c]isoxazole (**1f**)

Yield: 128 mg, 87%; light yellow oil;  $R_f = 0.36$  (EA/PE = 1/20);  $^1\text{H NMR}$  (500 MHz,  $\text{CDCl}_3$ )  $\delta$  8.93 (s, 1H), 7.21 (d,  $J = 9.0 \text{ Hz}$ , 1H), 6.75 (d,  $J = 9.0 \text{ Hz}$ , 1H), 2.41 (s, 3H), 2.24 (s, 3H) ppm;  $^{13}\text{C NMR}$  (125 MHz,  $\text{CDCl}_3$ )  $\delta$  157.8 (s), 154.0 (d), 136.6 (s), 129.4 (d), 121.3 (s), 117.3 (s), 115.9 (d), 19.1 (q), 13.2 (q) ppm; IR (reflection)  $\tilde{\nu} = 3115, 3049, 2922, 2861, 1637, 1533, 1448, 1379, 1309, 1252, 1205, 1175, 1113, 1015, 979, 922, 894, 851, 814, 755, 657 \text{ cm}^{-1}$ ; HRMS (EI) ( $m/z$ )  $\text{C}_9\text{H}_9\text{NO}$  calcd for 147.0684, found 147.0680.

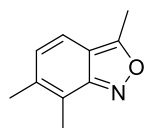

### 3,6,7-trimethylbenzo[c]isoxazole (**1g**)

Yield: 113 mg, 70%; colorless oil;  $R_f = 0.48$  (EA/PE = 1/20);  $^1\text{H NMR}$  (500 MHz,  $\text{CDCl}_3$ )  $\delta$  7.09 (d,  $J = 9.0 \text{ Hz}$ , 1H), 6.68 (d,  $J = 8.5 \text{ Hz}$ , 1H), 2.67 (s, 3H), 2.37 (s, 3H), 2.23 (s, 3H) ppm;  $^{13}\text{C NMR}$  (125 MHz,  $\text{CDCl}_3$ )  $\delta$  165.2 (s), 158.7 (s), 136.5 (s), 127.8 (d), 121.1 (s), 116.2 (d), 114.7 (s), 19.1 (q), 13.1 (q), 12.0 (q) ppm; IR (reflection)  $\tilde{\nu} = 2920, 1724, 1640, 1531, 1450, 1376, 1248, 1202, 1172, 1158, 1098, 1019, 903, 860, 797, 760, 662, 615 \text{ cm}^{-1}$ ; HRMS (EI) ( $m/z$ )  $\text{C}_{10}\text{H}_{11}\text{NO}$  calcd for 161.0841, found 161.0826.

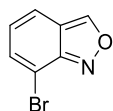

### 7-bromobenzo[c]isoxazole (1h)

Yield: 160 mg, 81%; colorless oil;  $R_f = 0.21$  (EA/PE = 1/20);  $^1\text{H NMR}$  (500 MHz,  $\text{CDCl}_3$ )  $\delta$  9.20 (s, 1H), 7.49 (d,  $J = 5.0$  Hz, 2H), 6.84 (dd,  $J = 7.0, 8.0$  Hz, 1H) ppm;  $^{13}\text{C NMR}$  (125 MHz,  $\text{CDCl}_3$ )  $\delta$  156.2 (s), 155.6 (s), 133.7 (d), 125.2 (d), 119.1 (d), 119.0 (s), 108.8 (d) ppm; IR (reflection)  $\tilde{\nu} = 3126, 3097, 1634, 1548, 1500, 1439, 1401, 1380, 1315, 1209, 1150, 1114, 1019, 952, 916, 874, 810, 774, 738, 670, 614$   $\text{cm}^{-1}$ ; HRMS (EI) ( $m/z$ )  $\text{C}_7\text{H}_4^{79}\text{BrNO}$  calcd for 196.9476, found 196.9484.

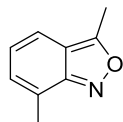

### 3,7-dimethylbenzo[c]isoxazole (1i)<sup>[1b]</sup>

Yield: 91 mg, 62%; light yellow oil;  $R_f = 0.36$  (EA/PE = 1/20);  $^1\text{H NMR}$  (500 MHz,  $\text{CDCl}_3$ )  $\delta$  7.19 (d,  $J = 8.5$  Hz, 1H), 6.92 (dt,  $J = 6.5, 1.0$  Hz, 1H), 6.77 (dd,  $J = 6.5, 9.0$  Hz, 1H), 2.70 (s, 3H), 2.45 (s, 3H) ppm;  $^{13}\text{C NMR}$  (125 MHz,  $\text{CDCl}_3$ )  $\delta$  165.6 (s), 157.9 (s), 129.0 (d), 125.5 (s), 123.3 (d), 117.1 (d), 115.6 (s), 17.0 (q), 12.1 (q) ppm; IR (reflection)  $\tilde{\nu} = 3470, 3055, 3029, 2975, 2924, 2854, 2736, 2540, 1915, 1697, 1645, 1568, 1547, 1450, 1405, 1378, 1273, 1225, 1162, 1056, 1037, 974, 896, 851, 780, 748, 715, 663$   $\text{cm}^{-1}$ ; HRMS (EI) ( $m/z$ )  $\text{C}_9\text{H}_9\text{NO}$  calcd for 147.0684, found 147.0681.

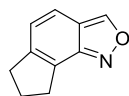

### 7,8-dihydro-6H-indeno[4,5-c]isoxazole (1k)

Yield: 132 mg, 83%; white solid, mp 48-49 °C;  $R_f = 0.40$  (EA/PE = 1/20);  $^1\text{H NMR}$  (300 MHz,  $\text{CDCl}_3$ )  $\delta$  8.98 (s, 1H), 7.21 (d,  $J = 8.7$  Hz, 1H), 6.89 (d,  $J = 8.7$  Hz, 1H), 3.13-3.05 (m, 2H), 2.92-2.83 (m, 2H), 2.22-2.10 (m, 2H) ppm;  $^{13}\text{C NMR}$  (125 MHz,  $\text{CDCl}_3$ )  $\delta$  154.6 (s), 154.3 (d), 146.2 (s), 127.6 (s), 123.3 (d), 118.4 (s), 117.7 (d), 33.9 (t), 30.3 (t), 24.1 (t) ppm; IR (ATR)  $\tilde{\nu} = 3125, 3038, 2917, 2860, 1646, 1531, 1451, 1360, 1297, 1257, 1211, 1166, 1107, 1019, 979, 921, 898, 851, 811, 757, 638$   $\text{cm}^{-1}$ ; HRMS (EI) ( $m/z$ )  $\text{C}_{10}\text{H}_9\text{NO}$  calcd for 159.0684, found 159.0674.

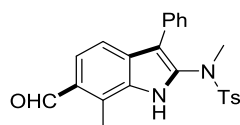

### N-(6-formyl-7-methyl-3-phenyl-1H-indol-2-yl)-N,4-dimethylbenzenesulfonamide (3a)

Yield: 73 mg, 87%; white solid, mp 216-218 °C;  $R_f = 0.27$  (EA/PE = 1/4);  $^1\text{H NMR}$  (500 MHz,  $\text{DMSO}-d_6$ )  $\delta$  11.86 (brs, 1H), 10.36 (s, 1H), 7.54 (d,  $J = 8.5$  Hz, 1H), 7.44 (t,  $J = 8.0$  Hz, 3H), 7.31-7.26 (m, 3H), 7.26-7.22 (m, 2H), 7.19-7.13 (m, 2H), 3.26 (s, 3H), 2.86 (s, 3H), 2.38 (s, 3H) ppm;  $^{13}\text{C NMR}$  (125 MHz,  $\text{DMSO}-d_6$ )  $\delta$  192.8 (d), 144.2 (s), 135.4 (s), 134.9 (s), 133.5 (s), 133.1 (s), 130.1 (d, 2C), 129.7 (s), 129.4 (d, 2C), 128.8 (d, 2C), 128.5 (s), 127.8 (d, 2C), 126.9 (d), 126.6 (s), 122.1 (d), 117.1 (d), 114.0 (s), 38.7 (q), 21.5 (q), 12.9 (q) ppm; IR (reflection)  $\tilde{\nu} = 3175, 3065, 1739, 1645, 1613, 1556, 1493, 1463, 1440, 1422, 1370, 1346, 1326, 1306, 1269, 1213, 1187, 1154, 1090, 1073, 1048, 1024, 988, 923, 911, 863, 813, 774, 763, 738, 698, 670, 654$   $\text{cm}^{-1}$ ; HRMS (ESI) ( $m/z$ )  $[\text{M}-\text{H}]^-$   $\text{C}_{24}\text{H}_{21}\text{N}_2\text{O}_3\text{S}$  calcd for 417.1278, found 417.1275.

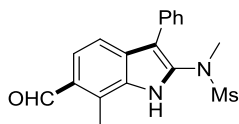

***N*-(6-formyl-7-methyl-3-phenyl-1*H*-indol-2-yl)-*N*-methylmethanesulfonamide (3b)**

Yield: 62 mg, 90%; light yellow solid, mp 246-248 °C;  $R_f = 0.14$  (EA/PE = 1/2);  $^1\text{H NMR}$  (500 MHz, Acetone- $d_6$ )  $\delta$  10.85 (brs, 1H), 10.26 (s, 1H), 7.52-7.47 (m, 3H), 7.44 (d,  $J = 8.5$  Hz, 1H), 7.39 (t,  $J = 7.5$  Hz, 2H), 7.26 (t,  $J = 7.5$  Hz, 1H), 3.24 (s, 3H), 2.76 (s, 3H), 2.70 (s, 3H) ppm;  $^{13}\text{C NMR}$  (125 MHz, Acetone- $d_6$ )  $\delta$  191.7 (d), 134.9 (s), 133.5 (s), 133.2 (s), 129.8 (s), 129.4 (d, 2C), 128.9 (s), 128.7 (d, 2C), 127.0 (d), 125.4 (s), 122.6 (d), 117.0 (d), 114.4 (s), 38.6 (q), 38.2 (q), 11.8 (q) ppm; IR (reflection)  $\tilde{\nu} = 3195, 3014, 2945, 2748, 1736, 1650, 1613, 1577, 1555, 1508, 1494, 1442, 1369, 1325, 1254, 1177, 1146, 1104, 1073, 1026, 966, 916, 867, 810, 783, 771, 760, 698, 648$   $\text{cm}^{-1}$ ; HRMS (ESI) ( $m/z$ ) [ $\text{M-H}$ ] $^-$   $\text{C}_{18}\text{H}_{17}\text{N}_2\text{O}_3\text{S}$  calcd for 341.0965, found 341.0964.

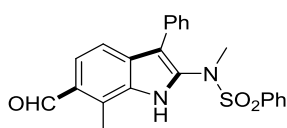

***N*-(6-formyl-7-methyl-3-phenyl-1*H*-indol-2-yl)-*N*-methylbenzenesulfonamide (3c)**

Yield: 76 mg, 94%; white solid, mp 265-267 °C;  $R_f = 0.14$  (EA/PE = 1/5);  $^1\text{H NMR}$  (500 MHz, DMSO- $d_6$ )  $\delta$  11.87 (s, 1H), 10.36 (s, 1H), 7.66 (t,  $J = 7.5$  Hz, 1H), 7.56 (dd,  $J = 12.0, 2.5$  Hz, 3H), 7.47 (dd,  $J = 14.5, 7.5$ , 3H), 7.30-7.26 (m, 3H), 7.18 (d,  $J = 7.0$  Hz, 2H), 3.27 (s, 3H), 2.85 (s, 3H) ppm;  $^{13}\text{C NMR}$  (125 MHz, DMSO- $d_6$ )  $\delta$  192.8 (d), 138.3 (s), 134.8 (s), 133.7 (d), 133.5 (s), 133.1 (s), 129.7 (d, 2C; s, 1C), 129.4 (d, 2C), 128.9 (d, 2C), 128.6 (s), 127.8 (d, 2C), 127.1 (d), 126.6 (s), 122.1 (d), 117.1 (d), 114.0 (s), 38.8 (q), 12.9 (q) ppm; IR (reflection)  $\tilde{\nu} = 3152, 3116, 3065, 3018, 2947, 1737, 1649, 1612, 1554, 1512, 1492, 1446, 1423, 1351, 1331, 1271, 1213, 1188, 1161, 1092, 1074, 1049, 1025, 1002, 990, 924, 913, 867, 813, 777, 764, 741, 718, 688, 667, 605$   $\text{cm}^{-1}$ ; HRMS (ESI) ( $m/z$ ) [ $\text{M-H}$ ] $^-$   $\text{C}_{23}\text{H}_{19}\text{N}_2\text{O}_3\text{S}$  calcd for 403.1122, found 403.1121.

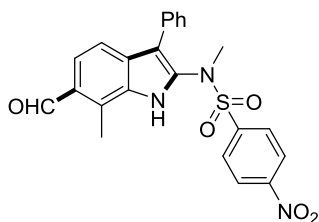

***N*-(6-formyl-7-methyl-3-phenyl-1*H*-indol-2-yl)-*N*-methyl-4-nitrobenzenesulfonamide (3d)**

Yield: 78 mg, 87%; yellow solid, mp 289-290 °C;  $R_f = 0.10$  (EA/PE = 1/5);  $^1\text{H NMR}$  (500 MHz, DMSO- $d_6$ )  $\delta$  12.01 (s, 1H), 10.36 (s, 1H), 8.12 (d,  $J = 9.0$  Hz, 2H), 7.75 (d,  $J = 8.5$  Hz, 2H), 7.55 (d,  $J = 8.5$  Hz, 1H), 7.47 (d,  $J = 8.5$  Hz, 1H), 7.25-7.21 (m, 4H), 7.19-7.16 (m, 1H), 3.50 (s, 3H), 2.84 (s, 3H) ppm;  $^{13}\text{C NMR}$  (125 MHz, DMSO- $d_6$ )  $\delta$  192.8 (d), 150.2 (s), 144.2 (s), 133.9 (s), 133.7 (s), 132.9 (s), 129.34 (s), 129.25 (d, 2C), 129.1 (d, 2C), 128.9 (d, 2C), 128.8 (s), 126.8 (d), 126.7 (s), 124.7 (d, 2C), 122.1 (d), 117.3 (d), 114.5 (s), 39.9 (q), 12.9 (q) ppm; IR (reflection)  $\tilde{\nu} = 3172, 3103, 3065, 1738, 1647, 1614, 1555, 1526, 1492, 1462, 1440, 1422, 1371, 1350, 1310, 1270, 1215, 1189, 1160, 1105, 1088, 1073, 1048, 1027, 1013, 1002, 990, 916, 870, 853, 817, 777, 764, 740, 710, 699, 685, 667, 610$   $\text{cm}^{-1}$ ; HRMS (ESI) ( $m/z$ ) [ $\text{M-H}$ ] $^-$   $\text{C}_{23}\text{H}_{18}\text{N}_3\text{O}_5\text{S}$  calcd for 448.0973, found 448.0974.

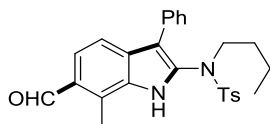

***N*-butyl-*N*-(6-formyl-7-methyl-3-phenyl-1*H*-indol-2-yl)-4-methylbenzenesulfonamide (3e)**

Yield: 83 mg, 90%; white solid, mp 144-146 °C;  $R_f = 0.26$  (EA/PE = 1/5);  $^1\text{H NMR}$  (500 MHz,  $\text{CDCl}_3$ )  $\delta$  10.29 (s, 1H), 8.97 (brs, 1H), 7.52 (t,  $J = 8.0$  Hz, 3H), 7.35 (d,  $J = 8.5$  Hz, 1H), 7.23 (d,  $J = 8.5$  Hz, 2H), 7.17-7.14 (m, 1H), 7.08 (t,  $J = 7.5$  Hz, 2H), 6.53 (d,  $J = 7.5$  Hz, 2H), 3.25 (t,  $J = 7.0$  Hz, 2H), 2.80 (s, 3H), 2.38 (s, 3H), 1.28 (t,  $J = 7.5$  Hz, 2H), 1.07-1.02 (m, 2H), 0.65 (t,  $J = 7.5$  Hz, 3H) ppm;  $^{13}\text{C NMR}$  (125 MHz,  $\text{CDCl}_3$ )  $\delta$  192.5 (d), 144.4 (s), 135.3 (s), 133.0 (s), 132.3 (s), 132.0 (s), 130.4 (s), 130.0 (d, 2C), 129.2 (d, 2C), 128.6 (s), 128.4 (d, 2C), 127.4 (d, 2C), 127.3 (d), 124.5 (s), 123.7 (d), 117.0 (d), 113.1 (s), 49.5 (q), 30.9 (q), 21.6 (t), 19.5 (q), 13.5 (t), 12.8 (t) ppm; IR (reflection)  $\tilde{\nu} = 3259, 3057, 2957, 2929, 2872, 2716, 1656, 1613, 1543, 1492, 1460, 1442, 1364, 1316, 1261, 1225, 1207, 1185, 1167, 1090, 1033, 1012, 953, 909, 884, 863, 811, 771, 733, 707, 695, 667$   $\text{cm}^{-1}$ ; HRMS (ESI) ( $m/z$ )  $[\text{M}-\text{H}]^-$   $\text{C}_{27}\text{H}_{27}\text{N}_2\text{O}_3\text{S}$  calcd for 459.1748, found 459.1748.

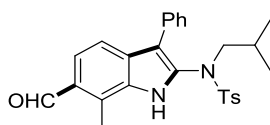

***N*-(6-formyl-7-methyl-3-phenyl-1*H*-indol-2-yl)-*N*-isobutyl-4-methylbenzenesulfonamide (3f)**

Yield: 70 mg, 76%; white solid, mp 221-224 °C;  $R_f = 0.34$  (EA/PE = 1/5);  $^1\text{H NMR}$  (500 MHz,  $\text{DMSO}-d_6$ )  $\delta$  10.29 (s, 1H), 8.96 (brs, 1H), 7.53 (d,  $J = 8.0$  Hz, 2H), 7.51 (d,  $J = 8.0$  Hz, 1H), 7.30 (d,  $J = 8.5$  Hz, 1H), 7.27 (d,  $J = 8.0$  Hz, 2H), 7.17 (t,  $J = 7.5$  Hz, 1H), 7.07 (t,  $J = 8.0$  Hz, 2H), 6.41 (d,  $J = 7.5$  Hz, 2H), 2.99 (d,  $J = 7.0$  Hz, 2H), 2.82 (s, 3H), 2.40 (s, 3H), 1.45 (hept,  $J = 7.0$  Hz, 1H), 0.63 (d,  $J = 6.5$  Hz, 6H) ppm;  $^{13}\text{C NMR}$  (125 MHz,  $\text{DMSO}-d_6$ )  $\delta$  192.4 (d), 144.5 (s), 135.2 (s), 132.8 (s), 132.3 (s), 132.1 (s), 130.6 (s), 130.1 (d, 2C), 129.3 (d, 2C), 128.6 (s), 128.4 (d, 2C), 127.41 (d, 2C), 127.40 (d), 124.4 (s), 123.7 (d), 116.9 (d), 112.6 (s), 56.1 (t), 27.3 (d), 21.7 (q), 19.7 (q), 12.8 (q, 2C) ppm; IR (reflection)  $\tilde{\nu} = 3206, 3063, 2970, 2953, 2870, 2738, 1738, 1658, 1614, 1542, 1504, 1490, 1469, 1443, 1385, 1364, 1339, 1322, 1269, 1233, 1207, 1164, 1089, 1050, 1031, 1008, 936, 855, 824, 811, 769, 744, 703, 670, 657, 632$   $\text{cm}^{-1}$ ; HRMS (ESI) ( $m/z$ )  $[\text{M}-\text{H}]^-$   $\text{C}_{27}\text{H}_{27}\text{N}_2\text{O}_3\text{S}$  calcd for 459.1748, found 459.1749.

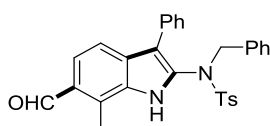

***N*-benzyl-*N*-(6-formyl-7-methyl-3-phenyl-1*H*-indol-2-yl)-4-methylbenzenesulfonamide (3g)**

Yield: 82 mg, 83%; white solid, mp 231-233 °C;  $R_f = 0.21$  (EA/PE = 1/5);  $^1\text{H NMR}$  (500 MHz,  $\text{DMSO}-d_6$ )  $\delta$  11.85 (brs, 1H), 10.36 (s, 1H), 7.67 (d,  $J = 8.5$  Hz, 2H), 7.47 (d,  $J = 8.5$  Hz, 1H), 7.42 (d,  $J = 8.5$  Hz, 2H), 7.30-7.25 (m, 2H), 7.21 (t,  $J = 7.5$  Hz, 2H), 7.18-7.13 (m, 3H), 7.03-6.98 (m, 2H), 6.75 (d,  $J = 7.5$  Hz, 2H), 4.65 (brs, 2H), 2.85 (s, 3H), 2.46 (s, 3H) ppm;  $^{13}\text{C NMR}$  (125 MHz,  $\text{DMSO}-d_6$ )  $\delta$  192.7 (d), 144.7 (s), 135.7 (s), 135.6 (s), 133.6 (s), 132.9 (s), 132.4 (s), 130.4 (d, 2C), 129.9 (s), 129.5 (d, 2C), 129.0 (d, 2C), 128.7 (d, 2C), 128.6 (d, 2C), 128.5 (s), 128.31 (d, 2C), 128.29 (d), 127.2 (d), 126.5 (s), 121.9 (d), 116.8 (d), 115.1 (s), 53.3 (t), 21.6 (q), 12.9 (q) ppm; IR (reflection)  $\tilde{\nu} = 3285, 3055, 2985, 2839, 2721, 1735, 1671, 1619, 1545, 1504, 1455, 1441, 1414, 1361, 1305,$



1254, 1198, 1185, 1166, 1090, 1042, 970, 933, 917, 855, 844, 818, 805, 772, 755, 730, 707, 693, 660, 634  $\text{cm}^{-1}$ ; HRMS (ESI) ( $m/z$ )  $[\text{M}-\text{H}]^-$   $\text{C}_{30}\text{H}_{25}\text{N}_2\text{O}_3\text{S}$  calcd for 493.1591, found 493.1592.

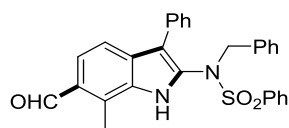

***N*-benzyl-*N*-(6-formyl-7-methyl-3-phenyl-1*H*-indol-2-yl)benzenesulfonamide (3h)**

Yield: 76 mg, 79%; white solid, mp 215-218 °C;  $R_f$  = 0.15 (EA/PE = 1/5);  $^1\text{H}$  NMR (500 MHz,  $\text{DMSO}-d_6$ )  $\delta$  11.75 (s, 1H), 10.33 (s, 1H), 7.80-7.78 (m, 3H), 7.63 (t,  $J$  = 7.5 Hz, 2H), 7.48 (d,  $J$  = 8.5 Hz, 1H), 7.28 (t,  $J$  = 7.5 Hz, 2H), 7.21 (t,  $J$  = 7.5 Hz, 2H), 7.19-7.13 (m, 3H), 7.00 (d,  $J$  = 7.0 Hz, 2H), 6.75 (d,  $J$  = 8.0 Hz, 2H), 4.67 (brs, 2H), 2.85 (s, 3H) ppm;  $^{13}\text{C}$  NMR (125 MHz,  $\text{DMSO}-d_6$ )  $\delta$  192.7 (d), 138.6 (s), 135.5 (s), 134.1 (d), 133.6 (s), 132.9 (s), 132.3 (s), 130.0 (d, 2C), 129.9 (s), 129.5 (d, 2C), 129.0 (d, 2C), 128.7 (d, 2C), 128.7 (d, 2C), 128.5 (s), 128.32 (d), 128.25 (d, 2C), 127.3 (d), 126.5 (s), 121.9 (d), 116.9 (d), 115.1 (s), 53.4 (t), 12.9 (q) ppm; IR (reflection)  $\tilde{\nu}$  = 3281, 3059, 3029, 2841, 2724, 1670, 1619, 1545, 1505, 1494, 1445, 1414, 1364, 1333, 1310, 1257, 1197, 1170, 1090, 1044, 1028, 999, 973, 914, 855, 831, 806, 774, 752, 733, 719, 706, 692, 650  $\text{cm}^{-1}$ ; HRMS (ESI) ( $m/z$ )  $[\text{M}-\text{H}]^-$   $\text{C}_{29}\text{H}_{23}\text{N}_2\text{O}_3\text{S}$  calcd for 479.1435, found 479.1433.

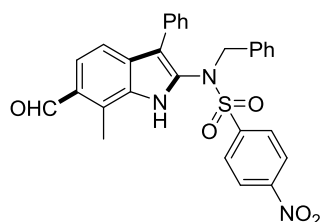

***N*-benzyl-*N*-(6-formyl-7-methyl-3-phenyl-1*H*-indol-2-yl)-4-nitrobenzenesulfonamide (3i)**

Yield: 95 mg, 90%; yellow solid, mp 206-207 °C;  $R_f$  = 0.28 (EA/PE = 1/4);  $^1\text{H}$  NMR (500 MHz,  $\text{CDCl}_3$ )  $\delta$  10.23 (s, 1H), 8.44 (s, 1H), 8.06 (d,  $J$  = 8.5 Hz, 2H), 7.70 (d,  $J$  = 8.5 Hz, 2H), 7.48 (d,  $J$  = 8.5 Hz, 1H), 7.35 (d,  $J$  = 8.5 Hz, 1H), 7.25-7.20 (m, 3H), 7.17-7.13 (m, 3H), 7.09 (t,  $J$  = 7.5 Hz, 2H), 6.65 (d,  $J$  = 7.5 Hz, 2H), 4.72 (s, 2H), 2.61 (s, 3H) ppm;  $^{13}\text{C}$  NMR (125 MHz,  $\text{CDCl}_3$ )  $\delta$  192.4 (d), 150.3 (s), 144.1 (s), 135.4 (s), 133.3 (s), 131.9 (s), 130.2 (s), 129.6 (s), 129.1 (s), 129.0 (d, 2C), 128.92 (d, 2C), 128.87 (d, 2C), 128.73 (d), 128.68 (d, 2C), 128.66 (d, 2C), 127.5 (d), 124.7 (s), 124.2 (d, 2C), 123.8 (d), 117.6 (d), 115.1 (s), 55.4 (t), 12.5 (q) ppm; IR (reflection)  $\tilde{\nu}$  = 3254, 3092, 3058, 3031, 2976, 2845, 2736, 1804, 1674, 1619, 1548, 1534, 1507, 1456, 1416, 1402, 1372, 1357, 1310, 1256, 1173, 1087, 1057, 1043, 1028, 971, 916, 850, 833, 806, 778, 756, 737, 709, 696, 649, 609  $\text{cm}^{-1}$ ; HRMS (ESI) ( $m/z$ )  $[\text{M}-\text{H}]^-$   $\text{C}_{29}\text{H}_{22}\text{N}_3\text{O}_5\text{S}$  calcd for 524.1286, found 524.1290.

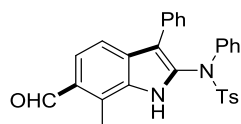

***N*-(6-formyl-7-methyl-3-phenyl-1*H*-indol-2-yl)-4-methyl-*N*-phenylbenzenesulfonamide (3j)**

Yield: 45 mg, 47%; yellow solid, mp 118-120 °C;  $R_f$  = 0.17 (EA/PE = 1/5);  $^1\text{H}$  NMR (500 MHz,  $\text{CDCl}_3$ )  $\delta$  10.28 (s, 1H), 9.18 (s, 1H), 7.52 (t,  $J$  = 8.5 Hz, 3H), 7.37 (d,  $J$  = 8.0 Hz, 1H), 7.14 (t,  $J$  = 7.5 Hz, 3H), 7.11-7.05 (m, 5H), 7.00 (d,  $J$  = 8.5 Hz, 2H), 6.81 (d,  $J$  = 7.5 Hz, 2H), 2.81 (s, 3H), 2.35 (s, 3H) ppm;  $^{13}\text{C}$  NMR (125 MHz,  $\text{CDCl}_3$ )  $\delta$  192.6 (d), 144.7 (s), 140.5 (s), 136.0 (s), 133.4 (s), 133.0 (s), 131.9 (s), 130.3 (s), 129.8 (d, 2C), 129.5 (d, 2C), 129.03 (d, 2C), 128.95 (s), 128.1 (d, 2C), 127.8

(d, 2C), 127.2 (d), 127.1 (d), 126.5 (d, 2C), 124.8 (s), 123.9 (d), 117.7 (d), 115.8 (s), 21.7 (q), 12.8 (q) ppm; IR (reflection)  $\tilde{\nu}$  = 3323, 3064, 2927, 1672, 1597, 1556, 1491, 1441, 1362, 1246, 1215, 1186, 1163, 1090, 1020, 946, 873, 812, 776, 756, 734, 695, 658, 637, 619  $\text{cm}^{-1}$ ; HRMS (DART) ( $m/z$ )  $[\text{M}+\text{H}]^+$   $\text{C}_{29}\text{H}_{25}\text{N}_2\text{O}_3\text{S}$  calcd for 481.1580, found 481.1590.

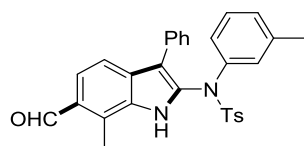

***N*-(6-formyl-7-methyl-3-phenyl-1*H*-indol-2-yl)-4-methyl-*N*-(*m*-tolyl)benzenesulfonamide (3k)**

Yield: 55 mg, 56%; light yellow solid, mp 170-173 °C;  $R_f$  = 0.23 (EA/PE = 1/5);  $^1\text{H}$  NMR (300 MHz,  $\text{CDCl}_3$ )  $\delta$  10.29 (s, 1H), 9.07 (brs, 1H), 7.52 (d,  $J$  = 8.4 Hz, 3H), 7.35 (d,  $J$  = 8.4 Hz, 1H), 7.18-7.06 (m, 5H), 7.00-6.92 (m, 1H), 6.90-6.84 (m, 1H), 6.82-6.74 (m, 4H), 2.82 (s, 3H), 2.36 (s, 3H), 2.09 (s, 3H) ppm;  $^{13}\text{C}$  NMR (125 MHz,  $\text{CDCl}_3$ )  $\delta$  192.5 (d), 144.6 (s), 140.2 (s), 139.0 (s), 136.1 (s), 133.3 (s), 133.2 (s), 131.9 (s), 130.4 (s), 129.8 (d, 2C), 129.6 (d, 2C), 128.9 (s), 128.7 (d), 128.2 (d), 128.1 (d, 2C), 127.8 (d, 2C), 127.5 (d), 127.1 (d), 124.8 (s), 123.9 (d), 123.8 (d), 117.6 (d), 115.6 (s), 21.7 (q), 21.2 (q), 12.8 (q) ppm; IR (reflection)  $\tilde{\nu}$  = 3266, 3065, 2846, 2733, 1670, 1608, 1549, 1498, 1439, 1368, 1345, 1306, 1257, 1185, 1162, 1090, 1046, 1022, 972, 946, 893, 878, 839, 808, 789, 772, 761, 707, 657  $\text{cm}^{-1}$ ; HRMS (ESI) ( $m/z$ )  $[\text{M}-\text{H}]^-$   $\text{C}_{30}\text{H}_{25}\text{N}_2\text{O}_3\text{S}$  calcd for 493.1591, found 493.1588.

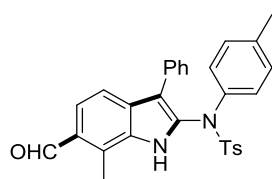

***N*-(6-formyl-7-methyl-3-phenyl-1*H*-indol-2-yl)-4-methyl-*N*-(*p*-tolyl)benzenesulfonamide (3l)**

Yield: 64 mg, 65%; grey solid, mp 211-214 °C;  $R_f$  = 0.34 (EA/PE = 1/4);  $^1\text{H}$  NMR (500 MHz,  $\text{CDCl}_3$ )  $\delta$  10.27 (s, 1H), 9.15 (brs, 1H), 7.51 (t,  $J$  = 7.5 Hz, 3H), 7.36 (d,  $J$  = 8.5 Hz, 1H), 7.16-7.08 (m, 5H), 6.92-6.84 (m, 6H), 2.78 (s, 3H), 2.35 (s, 3H), 2.16 (s, 3H) ppm;  $^{13}\text{C}$  NMR (125 MHz,  $\text{CDCl}_3$ )  $\delta$  192.6 (d), 144.6 (s), 137.7 (s), 137.5 (s), 136.1 (s), 133.3 (s), 133.2 (s), 132.0 (s), 130.3 (s), 129.8 (d, 2C), 129.7 (d, 2C), 129.6 (d, 2C), 128.9 (s), 128.1 (d, 2C), 127.8 (d, 2C), 127.1 (d), 126.8 (d, 2C), 124.8 (s), 123.8 (d), 117.6 (d), 115.7 (s), 21.7 (q), 21.0 (q), 12.8 (q) ppm; IR (reflection)  $\tilde{\nu}$  = 3293, 3032, 2918, 2861, 2754, 1738, 1668, 1613, 1578, 1555, 1496, 1435, 1371, 1353, 1319, 1238, 1199, 1167, 1090, 1041, 1019, 952, 926, 884, 836, 812, 762, 713, 699, 663  $\text{cm}^{-1}$ ; HRMS (ESI) ( $m/z$ )  $[\text{M}-\text{H}]^-$   $\text{C}_{30}\text{H}_{25}\text{N}_2\text{O}_3\text{S}$  calcd for 493.1591, found 493.1595.

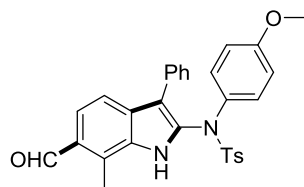

***N*-(6-formyl-7-methyl-3-phenyl-1*H*-indol-2-yl)-*N*-(4-methoxyphenyl)-4-methylbenzenesulfonamide (3m)**

Yield: 41 mg, 40%; light yellow solid, mp 218-220 °C;  $R_f$  = 0.19 (EA/PE = 1/4);  $^1\text{H}$  NMR (500 MHz,  $\text{CDCl}_3$ )  $\delta$  10.27 (s, 1H), 9.09 (brs, 1H), 7.53 (d,  $J$  = 8.0 Hz, 2H), 7.50 (d,  $J$  = 8.0 Hz, 1H), 7.34 (d,  $J$  = 8.0 Hz, 1H), 7.19-7.16 (m, 3H), 7.13 (t,  $J$  = 7.5 Hz, 2H), 6.91-6.85 (m, 4H), 6.57 (d,  $J$  = 9.0

Hz, 2H), 3.64 (s, 3H), 2.79 (s, 3H), 2.37 (s, 3H) ppm;  $^{13}\text{C}$  NMR (125 MHz,  $\text{CDCl}_3$ )  $\delta$  192.6 (d), 158.9 (s), 144.6 (s), 136.0 (s), 133.5 (s), 133.2 (s), 132.7 (s), 132.1 (s), 130.4 (s), 129.8 (d, 2C), 129.7 (d, 2C), 129.0 (d, 2C), 128.8 (s), 128.2 (d, 2C), 127.9 (d, 2C), 127.1 (d), 124.7 (s), 123.9 (d), 117.6 (d), 115.4 (s), 114.2 (d, 2C), 55.4 (q), 21.7 (q), 12.8 (q) ppm; IR (reflection)  $\tilde{\nu}$  = 3276, 2844, 2754, 1751, 1668, 1609, 1578, 1554, 1500, 1462, 1437, 1370, 1349, 1318, 1303, 1245, 1198, 1164, 1118, 1090, 1029, 949, 924, 882, 838, 814, 774, 762, 717, 699, 663  $\text{cm}^{-1}$ ; HRMS (ESI) ( $m/z$ )  $[\text{M}-\text{H}]^-$   $\text{C}_{30}\text{H}_{25}\text{N}_2\text{O}_4\text{S}$  calcd for 509.1541, found 509.1547.

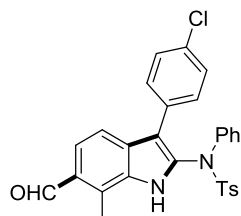

***N*-(3-(4-chlorophenyl)-6-formyl-7-methyl-1*H*-indol-2-yl)-4-methyl-*N*-phenylbenzenesulfonamide (3n)**

Yield: 46 mg, 45%; white solid, mp 193-196 °C;  $R_f$  = 0.32 (EA/PE = 1/4);  $^1\text{H}$  NMR (500 MHz,  $\text{CDCl}_3$ )  $\delta$  10.28 (s, 1H), 9.18 (brs, 1H), 7.52 (d,  $J$  = 8.0 Hz, 3H), 7.33 (d,  $J$  = 8.5 Hz, 1H), 7.16 (d,  $J$  = 8.0 Hz, 2H), 7.14-7.08 (m, 3H), 7.07-7.04 (m, 2H), 7.02 (d,  $J$  = 7.0 Hz, 2H), 6.75 (d,  $J$  = 8.5 Hz, 2H), 2.80 (s, 3H), 2.37 (s, 3H) ppm;  $^{13}\text{C}$  NMR (125 MHz,  $\text{CDCl}_3$ )  $\delta$  192.5 (d), 144.9 (s), 140.5 (s), 136.0 (s), 133.4 (s), 133.13 (s), 133.05 (s), 130.7 (d, 2C), 130.4 (s), 130.0 (s), 129.9 (d, 2C), 129.2 (d, 2C), 129.1 (s), 128.4 (d, 2C), 127.7 (d, 2C), 127.3 (d), 126.2 (d, 2C), 124.9 (s), 124.1 (d), 117.4 (d), 114.4 (s), 21.7 (q), 12.8 (q) ppm; IR (reflection)  $\tilde{\nu}$  = 3356, 3170, 2978, 2714, 1727, 1686, 1616, 1597, 1552, 1489, 1447, 1382, 1352, 1333, 1242, 1216, 1186, 1163, 1089, 1037, 1011, 935, 873, 837, 812, 757, 740, 715, 693, 657, 638, 616  $\text{cm}^{-1}$ ; HRMS (ESI) ( $m/z$ )  $[\text{M}-\text{H}]^-$   $\text{C}_{29}\text{H}_{22}^{35}\text{ClN}_2\text{O}_3\text{S}$  calcd for 513.1045, found 513.1051.

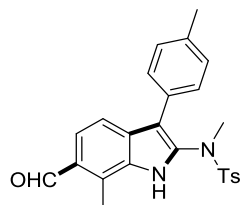

***N*-(6-formyl-7-methyl-3-(*p*-tolyl)-1*H*-indol-2-yl)-*N*,4-dimethylbenzenesulfonamide (3o)**

Yield: 79 mg, 92%; white solid, mp 250-253 °C;  $R_f$  = 0.16 (EA/PE = 1/5);  $^1\text{H}$  NMR (500 MHz,  $\text{DMSO}-d_6$ )  $\delta$  11.83 (brs, 1H), 10.35 (s, 1H), 7.53 (d,  $J$  = 8.5 Hz, 1H), 7.42 (d,  $J$  = 8.0 Hz, 3H), 7.24 (d,  $J$  = 7.0 Hz, 2H), 7.07 (d,  $J$  = 8.0 Hz, 2H), 7.02 (d,  $J$  = 8.0 Hz, 2H), 3.26 (s, 3H), 2.85 (s, 3H), 2.38 (s, 3H), 2.33 (s, 3H) ppm;  $^{13}\text{C}$  NMR (125 MHz,  $\text{DMSO}-d_6$ )  $\delta$  192.8 (d), 144.1 (s), 136.2 (s), 135.6 (s), 134.8 (s), 133.5 (s), 130.1 (s), 130.0 (d, 2C), 129.8 (s), 129.4 (d, 2C), 129.2 (d, 2C), 128.5 (s), 127.7 (d, 2C), 126.6 (s), 121.9 (d), 117.1 (d), 113.9 (s), 38.8 (q), 21.5 (q), 21.3 (q), 12.9 (q) ppm; IR (reflection)  $\tilde{\nu}$  = 3353, 2946, 2918, 2708, 1911, 1739, 1679, 1617, 1561, 1510, 1452, 1420, 1405, 1378, 1364, 1345, 1327, 1305, 1256, 1211, 1154, 1105, 1090, 1048, 1020, 999, 916, 868, 829, 808, 763, 746, 716, 659, 642, 624  $\text{cm}^{-1}$ ; HRMS (ESI) ( $m/z$ )  $[\text{M}-\text{H}]^-$   $\text{C}_{25}\text{H}_{23}\text{N}_2\text{O}_3\text{S}$  calcd for 431.1435, found 431.1434.

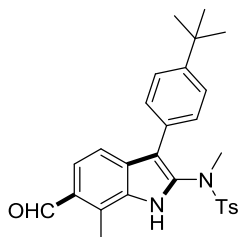

***N*-(3-(4-(*tert*-butyl)phenyl)-6-formyl-7-methyl-1*H*-indol-2-yl)-*N*,4-dimethylbenzenesulfonamide (3p)**

Yield: 94 mg, 99%; light yellow solid, mp 225-228 °C;  $R_f = 0.16$  (EA/PE = 1/5);  $^1\text{H}$  NMR (500 MHz, DMSO- $d_6$ )  $\delta$  11.74 (brs, 1H), 10.33 (s, 1H), 7.56-7.43 (m, 2H), 7.42-7.36 (m, 2H), 7.33-7.27 (m, 2H), 7.24-7.18 (m, 2H), 7.15-7.10 (m, 2H), 3.27 (s, 3H), 2.86 (s, 3H), 2.36 (s, 3H), 1.32 (s, 9H) ppm;  $^{13}\text{C}$  NMR (125 MHz, DMSO- $d_6$ )  $\delta$  192.8 (d), 149.2 (s), 143.9 (s), 135.5 (s), 134.7 (s), 133.6 (s), 130.1 (s), 129.9 (d, 2C), 129.8 (s), 129.0 (d, 2C), 128.5 (s), 127.9 (d, 2C), 126.6 (s), 125.5 (d, 2C), 121.9 (d), 117.2 (d), 114.1 (s), 38.7 (q), 34.7 (s), 31.6 (q), 21.6 (q), 12.9 (q, 3C) ppm; IR (reflection)  $\tilde{\nu} = 3203, 2959, 2868, 1739, 1668, 1650, 1614, 1554, 1509, 1458, 1419, 1364, 1345, 1327, 1267, 1212, 1155, 1090, 1046, 1019, 994, 919, 867, 839, 811, 757, 739, 720, 659, 608\text{ cm}^{-1}$ ; HRMS (ESI) ( $m/z$ ) [ $\text{M}-\text{H}$ ] $^-$   $\text{C}_{28}\text{H}_{29}\text{N}_2\text{O}_3\text{S}$  calcd for 473.1904, found 473.1904.

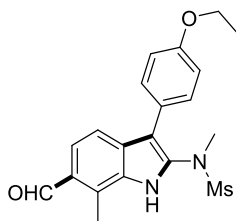

***N*-(3-(4-ethoxyphenyl)-6-formyl-7-methyl-1*H*-indol-2-yl)-*N*-methylmethanesulfonamide (3q)**

Yield: 77 mg, 99%; yellow solid, mp 247-249 °C;  $R_f = 0.13$  (EA/PE = 1/2);  $^1\text{H}$  NMR (500 MHz, DMSO- $d_6$ )  $\delta$  11.86 (s, 1H), 10.35 (s, 1H), 7.55 (d,  $J = 8.5$  Hz, 1H), 7.48 (d,  $J = 8.5$  Hz, 1H), 7.46 (d,  $J = 8.0$  Hz, 2H), 7.04 (d,  $J = 9.0$  Hz, 2H), 4.07 (q,  $J = 7.0$  Hz, 2H), 3.29 (s, 3H), 2.98 (s, 3H), 2.87 (s, 3H), 1.36 (t,  $J = 7.0$  Hz, 3H) ppm;  $^{13}\text{C}$  NMR (125 MHz, DMSO- $d_6$ )  $\delta$  192.8 (d), 157.9 (s), 135.0 (s), 133.4 (s), 130.6 (d, 2C), 129.8 (s), 128.4 (s), 126.5 (s), 125.3 (s), 122.0 (d), 117.2 (d), 115.1 (d, 2C), 114.0 (s), 63.5 (t), 39.5 (q), 38.7 (q), 15.2 (q), 12.9 (q) ppm; IR (reflection)  $\tilde{\nu} = 3185, 3016, 2974, 2942, 2921, 2880, 1738, 1652, 1608, 1552, 1511, 1474, 1408, 1391, 1367, 1324, 1283, 1240, 1178, 1147, 1102, 1072, 1044, 1011, 994, 977, 960, 922, 868, 842, 809, 774, 743, 720, 673, 643, 605\text{ cm}^{-1}$ ; HRMS (ESI) ( $m/z$ ) [ $\text{M}-\text{H}$ ] $^-$   $\text{C}_{20}\text{H}_{21}\text{N}_2\text{O}_4\text{S}$  calcd for 385.1228, found 385.1229.

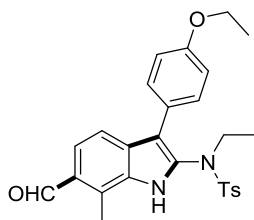

***N*-(3-(4-ethoxyphenyl)-6-formyl-7-methyl-1*H*-indol-2-yl)-*N*-ethyl-4-methylbenzenesulfonamide (3r)**

Yield: 91 mg, 96%; white solid, mp 208-210 °C;  $R_f = 0.33$  (EA/PE = 1/4);  $^1\text{H}$  NMR (500 MHz,  $\text{CDCl}_3$ )  $\delta$  10.28 (s, 1H), 8.92 (brs, 1H), 7.51 (t,  $J = 8.0$  Hz, 3H), 7.35 (d,  $J = 8.5$  Hz, 1H), 7.21 (d,  $J = 8.0$  Hz, 2H), 6.63-6.58 (m, 2H), 6.50-6.45 (m, 2H), 3.94 (q,  $J = 7.0$  Hz, 2H), 3.37 (q,  $J = 7.0$  Hz,

2H), 2.78 (s, 3H), 2.38 (s, 3H), 1.36 (t,  $J = 6.5$  Hz, 3H), 0.96 (t,  $J = 7.5$  Hz, 3H) ppm;  $^{13}\text{C}$  NMR (125 MHz,  $\text{CDCl}_3$ )  $\delta$  192.5 (d), 158.2 (s), 144.4 (s), 135.5 (s), 133.0 (s), 131.4 (s), 130.6 (s), 130.2 (d, 2C), 129.9 (d, 2C), 128.6 (s), 127.4 (d, 2C), 124.4 (s), 124.3 (s), 123.5 (d), 117.1 (d), 114.3 (d, 2C), 113.1 (s), 63.4 (t), 45.1 (t), 21.6 (q), 14.9 (q), 14.6 (q), 12.7 (q) ppm; IR (reflection)  $\tilde{\nu} = 3251, 2980, 2923, 2875, 1917, 1655, 1608, 1554, 1507, 1478, 1454, 1392, 1377, 1355, 1326, 1308, 1280, 1245, 1202, 1174, 1158, 1115, 1090, 1044, 1020, 1000, 950, 920, 873, 842, 812, 800, 784, 768, 741, 727, 706, 695, 666, 648$   $\text{cm}^{-1}$ ; HRMS (ESI) ( $m/z$ )  $[\text{M}-\text{H}]^-$   $\text{C}_{27}\text{H}_{27}\text{N}_2\text{O}_4\text{S}$  calcd for 475.1697, found 475.1699.

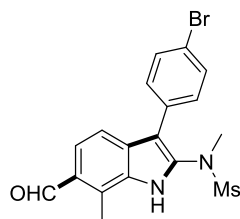

***N*-(3-(4-bromophenyl)-6-formyl-7-methyl-1*H*-indol-2-yl)-*N*-methylmethanesulfonamide (3s)**

Yield: 60 mg, 71%; white solid, mp 252-255 °C;  $R_f = 0.10$  (EA/PE = 1/2);  $^1\text{H}$  NMR (500 MHz,  $\text{DMSO}-d_6$ )  $\delta$  12.00 (s, 1H), 10.36 (s, 1H), 7.68 (d,  $J = 8.0$  Hz, 2H), 7.57 (d,  $J = 8.0$  Hz, 1H), 7.52 (t,  $J = 8.5$  Hz, 3H), 3.32 (s, 3H), 3.07 (s, 3H), 2.88 (s, 3H) ppm;  $^{13}\text{C}$  NMR (125 MHz,  $\text{DMSO}-d_6$ )  $\delta$  192.8 (d), 135.4 (s), 133.6 (s), 132.7 (s), 132.1 (d, 2C), 131.4 (d, 2C), 129.2 (s), 128.6 (s), 126.7 (s), 122.4 (d), 120.4 (s), 117.0 (d), 113.1 (s), 39.3 (q), 38.6 (q), 13.0 (q) ppm; IR (reflection)  $\tilde{\nu} = 3176, 3070, 2942, 1649, 1613, 1553, 1510, 1488, 1414, 1390, 1341, 1323, 1262, 1212, 1180, 1148, 1096, 1071, 1043, 1009, 993, 965, 917, 865, 832, 807, 772, 727, 680, 652, 629$   $\text{cm}^{-1}$ ; HRMS (ESI) ( $m/z$ )  $[\text{M}-\text{H}]^-$   $\text{C}_{18}\text{H}_{16}^{79}\text{BrN}_2\text{O}_3\text{S}$  calcd for 419.0070, found 419.0071.

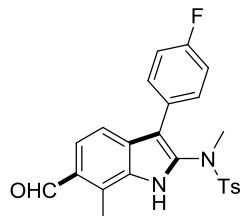

***N*-(3-(4-fluorophenyl)-6-formyl-7-methyl-1*H*-indol-2-yl)-*N*,4-dimethylbenzenesulfonamide (3t)**

Yield: 75 mg, 86%; white solid, mp 273-276 °C;  $R_f = 0.23$  (EA/PE = 1/4);  $^1\text{H}$  NMR (500 MHz,  $\text{DMSO}-d_6$ )  $\delta$  11.90 (s, 1H), 10.35 (s, 1H), 7.54 (d,  $J = 8.5$  Hz, 1H), 7.42 (d,  $J = 9.0$  Hz, 3H), 7.24 (d,  $J = 8.0$  Hz, 2H), 7.22-7.16 (m, 2H), 7.09 (t,  $J = 9.0$  Hz, 2H), 3.31 (s, 3H), 2.85 (s, 3H), 2.38 (s, 3H) ppm;  $^{13}\text{C}$  NMR (125 MHz,  $\text{DMSO}-d_6$ )  $\delta$  192.8 (d), 162.5 (d,  $J_{\text{C-F}} = 242.0$  Hz), 144.1 (s), 135.6 (s), 134.9 (s), 133.5 (s), 131.2 (d,  $J_{\text{C-F}} = 8.1$  Hz, 2C), 130.0 (d, 2C), 129.5 (s), 129.4 (d,  $J_{\text{C-F}} = 3.1$  Hz), 128.6 (s), 127.7 (d, 2C), 126.7 (s), 122.1 (d), 117.0 (d), 115.7 (d,  $J_{\text{C-F}} = 21.1$  Hz, 2C), 113.1 (s), 39.0 (q), 21.5 (q), 12.9 (q) ppm; IR (reflection)  $\tilde{\nu} = 3154, 3114, 3067, 3018, 1895, 1646, 1602, 1556, 1502, 1466, 1424, 1393, 1372, 1344, 1327, 1272, 1214, 1188, 1157, 1106, 1089, 1045, 1011, 994, 921, 867, 838, 814, 754, 721, 692, 658, 614$   $\text{cm}^{-1}$ ; HRMS (ESI) ( $m/z$ )  $[\text{M}+\text{Na}]^+$   $\text{C}_{24}\text{H}_{21}\text{FN}_2\text{NaO}_3\text{S}$  calcd for 459.1149, found 459.1160.

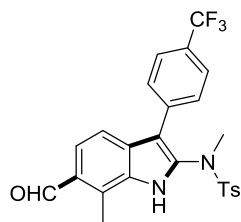

***N*-(6-formyl-7-methyl-3-(4-(trifluoromethyl)phenyl)-1*H*-indol-2-yl)-*N*,4-dimethylbenzenesulfonamide (3u)**

Yield: 49 mg, 50%; white solid, mp 273-276 °C;  $R_f$  = 0.20 (EA/PE = 1/4);  $^1\text{H}$  NMR (500 MHz, DMSO- $d_6$ )  $\delta$  12.09 (s, 1H), 10.36 (s, 1H), 7.62-7.55 (m, 3H), 7.51 (d,  $J$  = 8.5 Hz, 1H), 7.43 (d,  $J$  = 8.0 Hz, 2H), 7.36 (d,  $J$  = 8.0 Hz, 2H), 7.14 (d,  $J$  = 8.0 Hz, 2H), 3.42 (s, 3H), 2.86 (s, 3H), 2.32 (s, 3H) ppm;  $^{13}\text{C}$  NMR (125 MHz, DMSO- $d_6$ )  $\delta$  192.8 (d), 144.0 (s), 137.6 (s), 135.7 (s), 135.5 (s), 133.7 (s), 129.9 (d, 2C), 129.8 (d, 2C), 129.1 (d), 128.8 (d), 127.6 (d, 2C), 127.1 (q,  $J_{\text{C-F}}$  = 31.5 Hz), 126.8 (s), 125.6 (q,  $J_{\text{C-F}}$  = 3.8 Hz, 2C), 124.9 (q,  $J_{\text{C-F}}$  = 270.3 Hz), 122.4 (d), 116.9 (d), 112.8 (s), 39.1 (q), 21.3 (q), 12.9 (q) ppm;  $^{19}\text{F}$  NMR (471 MHz, DMSO- $d_6$ )  $\delta$  -60.78 (s, 3F) ppm; IR (reflection)  $\tilde{\nu}$  = 3161, 3066, 1647, 1612, 1557, 1514, 1494, 1463, 1425, 1406, 1345, 1323, 1270, 1213, 1187, 1157, 1120, 1103, 1091, 1068, 1014, 993, 921, 868, 848, 816, 776, 760, 736, 703, 679, 657, 610  $\text{cm}^{-1}$ ; HRMS (ESI) ( $m/z$ ) [ $\text{M}+\text{Na}$ ] $^+$   $\text{C}_{25}\text{H}_{21}\text{F}_3\text{N}_2\text{NaO}_3\text{S}$  calcd for 509.1117, found 509.1124.

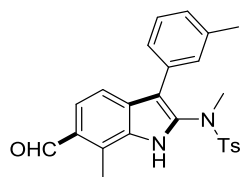

***N*-(6-formyl-7-methyl-3-(*m*-tolyl)-1*H*-indol-2-yl)-*N*,4-dimethylbenzenesulfonamide (3v)**

Yield: 78 mg, 90%; white solid, mp 231-233 °C;  $R_f$  = 0.34 (EA/PE = 1/4);  $^1\text{H}$  NMR (500 MHz,  $\text{CDCl}_3$ )  $\delta$  10.28 (s, 1H), 9.01 (brs, 1H), 7.51 (t,  $J$  = 8.5 Hz, 3H), 7.32 (d,  $J$  = 8.5 Hz, 1H), 7.25 (d,  $J$  = 8.0 Hz, 2H), 7.02 (t,  $J$  = 7.5 Hz, 1H), 6.96 (d,  $J$  = 7.5 Hz, 1H), 6.51 (d,  $J$  = 7.5 Hz, 1H), 6.13 (s, 1H), 2.94 (s, 3H), 2.81 (s, 3H), 2.39 (s, 3H), 2.06 (s, 3H) ppm;  $^{13}\text{C}$  NMR (125 MHz,  $\text{CDCl}_3$ )  $\delta$  192.5 (d), 144.6 (s), 137.8 (s), 134.1 (s), 133.9 (s), 132.6 (s), 132.3 (s), 130.6 (s), 130.1 (d, 2C), 130.0 (d), 128.6 (s), 128.2 (d), 128.0 (d), 127.6 (d, 2C), 126.5 (d), 124.3 (s), 123.7 (d), 117.0 (d), 111.7 (s), 38.1 (q), 21.7 (q), 21.3 (q), 12.7 (q) ppm; IR (reflection)  $\tilde{\nu}$  = 3168, 3116, 3067, 2915, 1738, 1643, 1614, 1586, 1554, 1512, 1484, 1425, 1391, 1371, 1343, 1326, 1305, 1270, 1212, 1182, 1156, 1108, 1090, 1058, 1008, 929, 905, 875, 842, 817, 801, 786, 764, 746, 710, 670, 653, 608  $\text{cm}^{-1}$ ; HRMS (ESI) ( $m/z$ ) [ $\text{M}-\text{H}$ ] $^-$   $\text{C}_{25}\text{H}_{25}\text{N}_2\text{O}_3\text{S}$  calcd for 431.1435, found 431.1438.

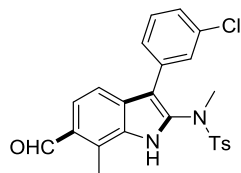

***N*-(3-(3-chlorophenyl)-6-formyl-7-methyl-1*H*-indol-2-yl)-*N*,4-dimethylbenzenesulfonamide (3w)**

Yield: 63 mg, 70%; white solid, mp 249-251 °C;  $R_f$  = 0.28 (EA/PE = 1/4);  $^1\text{H}$  NMR (500 MHz, DMSO- $d_6$ )  $\delta$  12.00 (s, 1H), 10.36 (s, 1H), 7.56 (d,  $J$  = 8.5 Hz, 1H), 7.45 (d,  $J$  = 8.5 Hz, 1H), 7.42 (d,  $J$  = 8.0 Hz, 2H), 7.35-7.27 (m, 2H), 7.25-7.19 (m, 3H), 7.08-7.05 (m, 1H), 3.33 (s, 3H), 2.85 (s, 3H),

2.38 (s, 3H) ppm;  $^{13}\text{C}$  NMR (125 MHz,  $\text{DMSO-}d_6$ )  $\delta$  192.8 (d), 144.2 (s), 135.4 (s), 135.3 (s), 135.2 (s), 133.6 (s), 133.5 (s), 130.7 (d), 130.1 (d, 2C), 129.3 (s), 128.74 (d), 128.67 (s), 128.0 (d), 127.6 (d, 2C), 126.8 (d), 126.7 (s), 122.3 (d), 116.9 (d), 112.5 (s), 38.9 (q), 21.5 (q), 12.9 (q) ppm; IR (reflection)  $\tilde{\nu}$  = 3153, 3116, 3061, 1739, 1645, 1613, 1597, 1553, 1511, 1479, 1425, 1393, 1371, 1344, 1325, 1271, 1211, 1188, 1157, 1109, 1090, 1075, 1052, 1020, 1001, 924, 888, 867, 816, 801, 786, 761, 698, 686, 662, 651, 610  $\text{cm}^{-1}$ ; HRMS (ESI) ( $m/z$ )  $[\text{M-H}]^-$   $\text{C}_{24}\text{H}_{20}^{35}\text{ClN}_2\text{O}_3\text{S}$  calcd for 451.0889, found 451.0893.

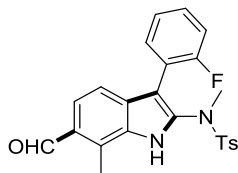

***N*-(3-(2-fluorophenyl)-6-formyl-7-methyl-1*H*-indol-2-yl)-*N*,4-dimethylbenzenesulfonamide (3x)**

Yield: 44 mg, 50%; white solid, mp 159-161 °C;  $R_f$  = 0.26 (EA/PE = 1/5);  $^1\text{H}$  NMR (500 MHz,  $\text{CDCl}_3$ )  $\delta$  10.26 (s, 1H), 9.29 (brs, 1H), 7.49 (d,  $J$  = 8.5 Hz, 1H), 7.45 (d,  $J$  = 8.5 Hz, 2H), 7.20-7.12 (m, 4H), 6.95 (t,  $J$  = 9.0 Hz, 1H), 6.78 (td,  $J$  = 7.5, 1.0 Hz, 1H), 6.23 (t,  $J$  = 7.5 Hz, 1H), 3.06 (s, 3H), 2.76 (s, 3H), 2.35 (s, 3H) ppm;  $^{13}\text{C}$  NMR (125 MHz,  $\text{CDCl}_3$ )  $\delta$  192.6 (d), 160.0 (d,  $J_{\text{C-F}}$  = 246.1 Hz), 144.5 (s), 135.2 (s), 134.1 (s), 132.7 (s), 132.1 (d,  $J_{\text{C-F}}$  = 3.1 Hz), 130.7 (s), 129.8 (d, 2C), 129.5 (d,  $J_{\text{C-F}}$  = 8.0 Hz), 128.6 (s), 127.5 (d, 2C), 124.7 (s), 123.8 (d,  $J_{\text{C-F}}$  = 3.4 Hz, 2C), 120.0 (d,  $J_{\text{C-F}}$  = 15.5 Hz), 117.3 (d,  $J_{\text{C-F}}$  = 1.9 Hz), 115.8 (d,  $J_{\text{C-F}}$  = 22.0 Hz), 105.9 (s), 38.0 (q), 21.6 (q), 12.7 (q) ppm;  $^{19}\text{F}$  NMR (471 MHz,  $\text{CDCl}_3$ )  $\delta$  -112.36 ppm; IR (reflection)  $\tilde{\nu}$  = 3159, 3067, 2951, 1911, 1651, 1619, 1554, 1495, 1448, 1413, 1355, 1326, 1266, 1213, 1161, 1093, 1068, 1032, 1019, 994, 921, 867, 810, 757, 727, 715, 682, 665  $\text{cm}^{-1}$ ; HRMS (DART) ( $m/z$ )  $[\text{M+H}]^+$   $\text{C}_{24}\text{H}_{22}\text{FN}_2\text{O}_3\text{S}$  calcd for 437.1330, found 437.1336.

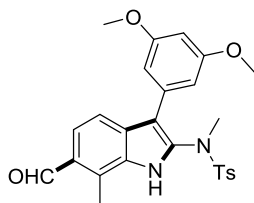

***N*-(3-(3,5-dimethoxyphenyl)-6-formyl-7-methyl-1*H*-indol-2-yl)-*N*,4-dimethylbenzenesulfonamide (3y)**

Yield: 85 mg, 89%; light yellow solid, mp 188-190 °C;  $R_f$  = 0.18 (EA/PE = 1/4);  $^1\text{H}$  NMR (500 MHz,  $\text{CDCl}_3$ )  $\delta$  10.27 (s, 1H), 9.07 (brs, 1H), 7.50 (d,  $J$  = 8.5 Hz, 3H), 7.37 (d,  $J$  = 8.5 Hz, 1H), 7.19 (d,  $J$  = 8.5 Hz, 2H), 6.27 (t,  $J$  = 2.0 Hz, 1H), 5.83 (d,  $J$  = 2.0 Hz, 2H), 3.59 (s, 6H), 3.05 (s, 3H), 2.78 (s, 3H), 2.35 (s, 3H) ppm;  $^{13}\text{C}$  NMR (125 MHz,  $\text{CDCl}_3$ )  $\delta$  192.5 (d), 160.6 (s, 2C), 144.8 (s), 134.2 (s), 134.13 (s), 134.07 (s), 132.6 (s), 130.5 (s), 130.1 (d, 2C), 128.6 (s), 127.4 (d, 2C), 124.4 (s), 123.8 (d), 117.1 (d), 111.7 (s), 107.8 (d, 2C), 99.0 (d), 55.3 (q, 2C), 38.2 (q), 21.6 (q), 12.7 (q) ppm; IR (reflection)  $\tilde{\nu}$  = 3350, 2943, 2833, 2693, 1694, 1679, 1590, 1551, 1501, 1450, 1409, 1343, 1323, 1288, 1256, 1220, 1203, 1150, 1102, 1085, 1064, 1040, 1009, 935, 918, 866, 820, 796, 786, 764, 746, 718, 684, 668, 629  $\text{cm}^{-1}$ ; HRMS (ESI) ( $m/z$ )  $[\text{M-H}]^-$   $\text{C}_{26}\text{H}_{25}\text{N}_2\text{O}_5\text{S}$  calcd for 477.1490, found 477.1492.

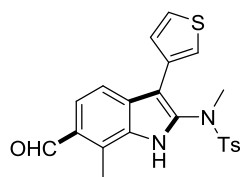

***N*-(6-formyl-7-methyl-3-(thiophen-3-yl)-1*H*-indol-2-yl)-*N*,4-dimethylbenzenesulfonamide (3z)**

Yield: 77 mg, 91%; white solid, mp 248-249 °C;  $R_f = 0.23$  (EA/PE = 1/4);  $^1\text{H NMR}$  (500 MHz, DMSO- $d_6$ )  $\delta$  11.79 (s, 1H), 10.36 (s, 1H), 7.57 (q,  $J = 8.5$  Hz, 2H), 7.53-7.48 (m, 3H), 7.35-7.30 (m, 3H), 7.07 (dd,  $J = 1.0, 5.0$  Hz, 1H), 3.27 (s, 3H), 2.83 (s, 3H), 2.40 (s, 3H) ppm;  $^{13}\text{C NMR}$  (125 MHz, DMSO- $d_6$ )  $\delta$  192.8 (d), 144.2 (s), 135.5 (s), 134.8 (s), 133.5 (s), 133.0 (s), 130.1 (d, 2C), 129.5 (s), 128.5 (s), 128.3 (d), 127.9 (d, 2C), 126.5 (s), 126.2 (d), 122.4 (d), 122.0 (d), 117.5 (d), 109.5 (s), 38.5 (q), 21.5 (q), 12.9 (q) ppm; IR (reflection)  $\tilde{\nu} = 3347, 2693, 1696, 1680, 1615, 1595, 1576, 1508, 1458, 1396, 1346, 1321, 1251, 1213, 1154, 1099, 1084, 100, 919, 867, 850, 815, 797, 783, 762, 741, 711, 688, 666, 638$  cm $^{-1}$ ; HRMS (ESI) ( $m/z$ ) [ $\text{M}-\text{H}$ ] $^-$  C $_{22}\text{H}_{19}\text{N}_2\text{O}_3\text{S}_2$  calcd for 423.0843, found 423.0846.

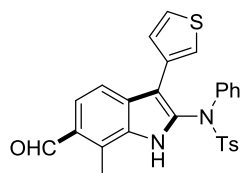

***N*-(6-formyl-7-methyl-3-(thiophen-3-yl)-1*H*-indol-2-yl)-4-methyl-*N*-phenylbenzenesulfonamide (3aa)**

Yield: 61 mg, 63%; yellow solid, mp 173-175 °C;  $R_f = 0.27$  (EA/PE = 1/4);  $^1\text{H NMR}$  (500 MHz, CDCl $_3$ )  $\delta$  10.29 (s, 1H), 9.04 (brs, 1H), 7.55 (d,  $J = 3.5$  Hz, 1H), 7.53 (d,  $J = 4.0$  Hz, 2H), 7.45 (d,  $J = 8.0$  Hz, 1H), 7.17-7.12 (m, 4H), 7.11-7.05 (m, 4H), 6.73-6.69 (m, 1H), 6.67 (dd,  $J = 1.0, 5.0$  Hz, 1H), 2.80 (s, 3H), 2.35 (s, 3H) ppm;  $^{13}\text{C NMR}$  (125 MHz, CDCl $_3$ )  $\delta$  192.5 (d), 144.7 (s), 140.6 (s), 136.2 (s), 133.4 (s), 132.9 (s), 131.7 (s), 130.2 (s), 129.8 (d, 2C), 129.2 (d, 2C), 129.0 (s), 128.3 (d), 127.6 (d, 2C), 127.0 (d), 125.5 (d, 2C), 125.1 (d), 124.8 (s), 123.9 (d), 123.0 (d), 117.9 (d), 111.0 (s), 21.7 (q), 12.8 (q) ppm; IR (reflection)  $\tilde{\nu} = 3253, 2922, 1738, 1672, 1615, 1595, 1563, 1493, 1452, 1360, 1323, 1249, 1185, 1164, 1090, 1033, 955, 932, 875, 854, 811, 786, 761, 706, 693, 663, 621$  cm $^{-1}$ ; HRMS (ESI) ( $m/z$ ) [ $\text{M}-\text{H}$ ] $^-$  C $_{27}\text{H}_{21}\text{N}_2\text{O}_3\text{S}_2$  calcd for 485.0999, found 485.1006.

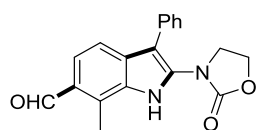

**7-methyl-2-(2-oxooxazolidin-3-yl)-3-phenyl-1*H*-indole-6-carbaldehyde (3ab)**

Yield: 42 mg, 66%; light yellow solid, mp 280-283 °C;  $R_f = 0.10$  (EA/PE = 1/2);  $^1\text{H NMR}$  (500 MHz, CDCl $_3$ )  $\delta$  10.28 (brs, 1H), 10.22 (s, 1H), 7.49 (d,  $J = 8.5$  Hz, 1H), 7.41-7.31 (m, 5H), 7.21 (d,  $J = 8.5$  Hz, 1H), 4.36 (t,  $J = 8.0$  Hz, 2H), 3.65 (t,  $J = 8.5$  Hz, 2H), 2.74 (s, 3H) ppm;  $^{13}\text{C NMR}$  (125 MHz, CDCl $_3$ )  $\delta$  192.3 (d), 156.6 (s), 132.9 (s), 132.8 (s), 131.7 (s), 131.6 (s), 131.1 (d, 2C), 128.5 (d, 2C), 127.9 (s), 127.7 (d), 124.5 (d), 124.0 (s), 115.9 (d), 104.8 (s), 63.2 (t), 45.7 (t), 12.6 (q) ppm; IR (reflection)  $\tilde{\nu} = 3155, 3116, 3068, 3021, 2922, 1750, 1649, 1617, 1579, 1559, 1497, 1478, 1445, 1409, 1373, 1336, 1311, 1276, 1202, 1144, 1104, 1082, 1056, 1030, 973, 938, 887, 816, 783, 759, 715, 662, 646$  cm $^{-1}$ ; HRMS (DART) ( $m/z$ ) [ $\text{M}+\text{H}$ ] $^+$  C $_{19}\text{H}_{17}\text{N}_2\text{O}_3$  calcd for 321.1234, found 321.1238.



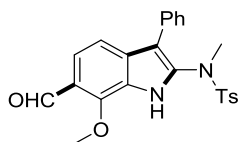

***N*-(6-formyl-7-methoxy-3-phenyl-1*H*-indol-2-yl)-*N*,4-dimethylbenzenesulfonamide (3ac)**

Yield: 48 mg, 55%; white solid, mp 169-171 °C;  $R_f = 0.18$  (EA/PE = 1/5);  $^1\text{H NMR}$  (500 MHz,  $\text{CDCl}_3$ )  $\delta$  10.38 (s, 1H), 9.07 (brs, 1H), 7.52 (d,  $J = 8.5$  Hz, 2H), 7.49 (d,  $J = 8.5$  Hz, 1H), 7.26 (d,  $J = 8.5$  Hz, 2H), 7.18-7.14 (m, 2H), 7.08 (t,  $J = 7.5$  Hz, 2H), 6.51 (d,  $J = 7.5$  Hz, 2H), 4.13 (s, 3H), 2.95 (s, 3H), 2.40 (s, 3H) ppm;  $^{13}\text{C NMR}$  (125 MHz,  $\text{CDCl}_3$ )  $\delta$  189.1 (d), 149.7 (s), 144.8 (s), 134.0 (s), 133.9 (s), 133.8 (s), 132.1 (s), 130.0 (d, 2C), 129.3 (d, 2C), 128.3 (d, 2C), 127.5 (d, 2C), 127.4 (d), 125.3 (s), 122.8 (s), 120.1 (d), 115.3 (d), 112.5 (s), 63.7 (q), 38.2 (q), 21.6 (q) ppm; IR (reflection)  $\tilde{\nu} = 3154, 3115, 3065, 2956, 2923, 2884, 1801, 1650, 1619, 1578, 1557, 1494, 1459, 1421, 1376, 1326, 1306, 1272, 1220, 1185, 1157, 1110, 1090, 1072, 1020, 965, 914, 878, 812, 782, 767, 745, 718, 698, 680, 661$   $\text{cm}^{-1}$ ; HRMS (ESI) ( $m/z$ ) [ $\text{M}+\text{H}$ ] $^+$   $\text{C}_{24}\text{H}_{23}\text{N}_2\text{O}_4\text{S}$  calcd for 435.1373, found 435.1379.

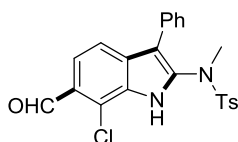

***N*-(7-chloro-6-formyl-3-phenyl-1*H*-indol-2-yl)-*N*,4-dimethylbenzenesulfonamide (3ad)**

Yield: 31 mg, 35%; white solid, mp 224-226 °C;  $R_f = 0.18$  (EA/PE = 1/5);  $^1\text{H NMR}$  (500 MHz,  $\text{CDCl}_3$ )  $\delta$  10.48 (s, 1H), 9.14 (brs, 1H), 7.61 (d,  $J = 8.0$  Hz, 1H), 7.54 (d,  $J = 8.0$  Hz, 2H), 7.34 (d,  $J = 8.0$  Hz, 1H), 7.27 (d,  $J = 8.5$  Hz, 2H), 7.18 (d,  $J = 8.5$  Hz, 1H), 7.10 (d,  $J = 7.5$  Hz, 2H), 6.51 (d,  $J = 7.0$  Hz, 2H), 2.94 (s, 3H), 2.41 (s, 3H) ppm;  $^{13}\text{C NMR}$  (125 MHz,  $\text{CDCl}_3$ )  $\delta$  189.2 (d), 144.9 (s), 134.8 (s), 133.8 (s), 132.1 (s), 131.7 (s), 130.1 (d, 2C), 130.0 (s), 129.3 (d, 2C), 128.4 (d, 2C), 127.59 (d), 127.56 (d, 2C), 126.6 (s), 121.9 (s), 120.6 (d), 118.0 (d), 112.6 (s), 38.2 (q), 21.7 (q) ppm; IR (reflection)  $\tilde{\nu} = 3144, 3101, 3044, 2988, 2922, 1733, 1685, 1655, 1618, 1577, 1560, 1547, 1493, 1453, 1425, 1351, 1329, 1306, 1270, 1238, 1184, 1158, 1134, 1092, 1072, 1032, 1012, 985, 959, 913, 855, 811, 770, 753, 726, 692, 654$   $\text{cm}^{-1}$ ; HRMS (ESI) ( $m/z$ ) [ $\text{M}-\text{H}$ ] $^-$   $\text{C}_{23}\text{H}_{18}^{35}\text{ClN}_2\text{O}_3\text{S}$  calcd for 437.0732, found 437.0733.

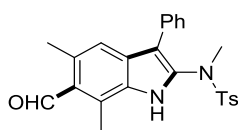

***N*-(6-formyl-5,7-dimethyl-3-phenyl-1*H*-indol-2-yl)-*N*,4-dimethylbenzenesulfonamide (3ae)**

Yield: 86 mg, 99%; white solid, mp 240-243 °C;  $R_f = 0.32$  (EA/PE = 1/4);  $^1\text{H NMR}$  (500 MHz,  $\text{CDCl}_3$ )  $\delta$  10.62 (s, 1H), 8.83 (brs, 1H), 7.50 (d,  $J = 8.0$  Hz, 2H), 7.23 (d,  $J = 8.0$  Hz, 2H), 7.16 (t,  $J = 7.0$  Hz, 1H), 7.08 (t,  $J = 8.0$  Hz, 2H), 7.05 (s, 1H), 6.51 (d,  $J = 7.5$  Hz, 2H), 2.94 (s, 3H), 2.74 (s, 3H), 2.58 (s, 3H), 2.39 (s, 3H) ppm;  $^{13}\text{C NMR}$  (125 MHz,  $\text{CDCl}_3$ )  $\delta$  193.3 (d), 144.6 (s), 134.1 (s), 133.9 (s), 133.1 (s), 132.5 (s), 131.6 (s), 130.0 (d, 2C), 129.9 (s), 129.4 (d, 2C), 128.3 (d, 2C), 127.5 (d, 2C), 127.2 (s), 127.1 (d), 124.9 (s), 118.9 (d), 111.4 (s), 38.2 (q), 21.7 (q), 21.1 (q), 14.0 (q) ppm; IR (reflection)  $\tilde{\nu} = 3328, 2734, 1688, 1619, 1597, 1563, 1481, 1393, 1334, 1239, 1213, 1187, 1154, 1084, 998, 899, 876, 861, 825, 804, 787, 762, 754, 731, 718, 672, 656, 638, 608$   $\text{cm}^{-1}$ ; HRMS (DART) ( $m/z$ ) [ $\text{M}+\text{H}$ ] $^+$   $\text{C}_{25}\text{H}_{25}\text{N}_2\text{O}_3\text{S}$  calcd for 433.1580, found 433.1585.

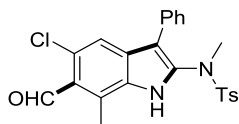

***N*-(5-chloro-6-formyl-7-methyl-3-phenyl-1*H*-indol-2-yl)-*N*,4-dimethylbenzenesulfonamide (3af)**

Yield: 90 mg, 99%; white solid, mp 272-275 °C;  $R_f = 0.44$  (EA/PE = 1/4);  $^1\text{H}$  NMR (500 MHz, DMSO- $d_6$ )  $\delta$  12.03 (s, 1H), 10.58 (s, 1H), 7.43 (s, 1H), 7.41 (d,  $J = 3.0$  Hz, 2H), 7.29 (t,  $J = 3.5$  Hz, 3H), 7.26 (d,  $J = 8.0$  Hz, 2H), 7.15-7.12 (m, 2H), 3.24 (s, 3H), 2.76 (s, 3H), 2.39 (s, 3H) ppm;  $^{13}\text{C}$  NMR (125 MHz, DMSO- $d_6$ )  $\delta$  192.8 (d), 170.9 (s), 144.3 (s), 136.1 (s), 135.2 (s), 132.6 (s), 132.4 (s), 130.1 (d, 2C), 129.3 (d, 2C), 129.0 (d, 2C), 128.8 (s), 127.8 (d, 2C), 127.6 (s), 127.2 (d), 124.4 (s), 117.9 (d), 113.6 (s), 38.6 (q), 21.5 (q), 15.0 (q) ppm; IR (reflection)  $\tilde{\nu} = 3323, 3065, 2919, 1670, 1613, 1580, 1551, 1498, 1475, 1371, 1347, 1328, 1302, 1250, 1154, 1121, 1088, 1060, 1034, 1017, 993, 934, 895, 852, 838, 814, 801, 780, 752, 715, 695, 660, 609$  cm $^{-1}$ ; HRMS (DART) ( $m/z$ )  $[\text{M}+\text{H}]^+$  C $_{24}\text{H}_{22}^{35}\text{ClN}_2\text{O}_3\text{S}$  calcd for 453.1034, found 453.1041.

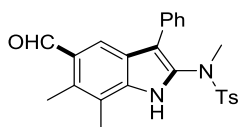

***N*-(5-formyl-6,7-dimethyl-3-phenyl-1*H*-indol-2-yl)-*N*,4-dimethylbenzenesulfonamide (4a)**

Yield: 86 mg, 99%; white solid, mp 248-250 °C;  $R_f = 0.37$  (EA/PE = 1/4);  $^1\text{H}$  NMR (500 MHz, DMSO- $d_6$ )  $\delta$  11.59 (s, 1H), 10.15 (s, 1H), 7.87 (s, 1H), 7.41 (d,  $J = 8.0$  Hz, 2H), 7.32-7.26 (m, 3H), 7.22 (d,  $J = 8.0$  Hz, 2H), 7.19 (d,  $J = 7.0$  Hz, 2H), 3.27 (s, 3H), 2.63 (s, 3H), 2.46 (s, 3H), 2.37 (s, 3H) ppm;  $^{13}\text{C}$  NMR (125 MHz, DMSO- $d_6$ )  $\delta$  194.0 (d), 144.1 (s), 137.0 (s), 135.5 (s), 133.1 (s), 132.1 (s), 131.9 (s), 130.0 (d, 2C), 129.3 (d, 2C), 128.9 (d, 2C), 128.6 (s), 127.8 (d, 2C), 126.9 (d), 124.8 (d), 123.5 (s), 120.9 (s), 114.8 (s), 38.8 (q), 21.5 (q), 14.7 (q), 13.7 (q) ppm; IR (reflection)  $\tilde{\nu} = 3350, 1686, 1617, 1599, 1565, 1494, 1473, 1417, 1341, 1310, 1243, 1206, 1155, 1122, 1086, 987, 894, 844, 813, 789, 759, 739, 713, 690, 665, 637$  cm $^{-1}$ ; HRMS (ESI) ( $m/z$ )  $[\text{M}-\text{H}]^-$  C $_{25}\text{H}_{23}\text{N}_2\text{O}_3\text{S}$  calcd for 431.1435, found 431.1442.

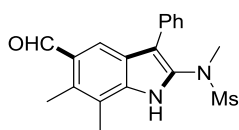

***N*-(5-formyl-6,7-dimethyl-3-phenyl-1*H*-indol-2-yl)-*N*-methylmethanesulfonamide (4b)**

Yield: 71 mg, 99%; light yellow solid, mp 215-218 °C;  $R_f = 0.10$  (EA/PE = 1/4);  $^1\text{H}$  NMR (500 MHz, DMSO- $d_6$ )  $\delta$  11.68 (s, 1H), 10.17 (s, 1H), 7.96 (s, 1H), 7.60 (d,  $J = 8.0$  Hz, 2H), 7.51 (t,  $J = 7.5$  Hz, 2H), 7.37 (t,  $J = 7.5$  Hz, 1H), 3.31 (s, 3H), 2.95 (s, 3H), 2.64 (s, 3H), 2.49 (s, 3H) ppm;  $^{13}\text{C}$  NMR (125 MHz, DMSO- $d_6$ )  $\delta$  194.0 (d), 137.0 (s), 133.4 (s), 132.5 (s), 131.9 (s), 129.3 (d, 2C), 129.2 (d, 2C), 128.6 (s), 127.3 (d), 124.9 (d), 123.4 (s), 121.0 (s), 114.5 (s), 39.4 (q), 38.8 (q), 14.7 (q), 13.8 (q) ppm; IR (reflection)  $\tilde{\nu} = 3259, 3015, 2933, 1738, 1657, 1598, 1495, 1431, 1410, 1330, 1244, 1199, 1148, 1098, 1075, 1030, 1004, 991, 974, 964, 896, 847, 791, 776, 765, 741, 715, 701, 683, 663, 626$  cm $^{-1}$ ; HRMS (DART) ( $m/z$ )  $[\text{M}+\text{H}]^+$  C $_{19}\text{H}_{21}\text{N}_2\text{O}_3\text{S}$  calcd for 357.1267, found 357.1273.

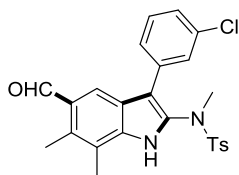

***N*-(3-(3-chlorophenyl)-5-formyl-6,7-dimethyl-1*H*-indol-2-yl)-*N*,4-dimethylbenzenesulfonamide (4c)**

Yield: 69 mg, 74%; white solid, mp 228-231 °C;  $R_f$  = 0.36 (EA/PE = 1/4);  $^1\text{H}$  NMR (500 MHz, DMSO- $d_6$ )  $\delta$  11.72 (s, 1H), 10.16 (s, 1H), 7.86 (s, 1H), 7.40 (d,  $J$  = 8.0 Hz, 2H), 7.35 (t,  $J$  = 8.0 Hz, 1H), 7.32-7.28 (m, 1H), 7.24 (d,  $J$  = 7.5 Hz, 1H), 7.21 (d,  $J$  = 8.0 Hz, 2H), 7.08 (s, 1H), 3.33 (s, 3H), 2.63 (s, 3H), 2.46 (s, 3H), 2.37 (s, 3H) ppm;  $^{13}\text{C}$  NMR (125 MHz, DMSO- $d_6$ )  $\delta$  194.0 (d), 144.1 (s), 137.0 (s), 135.6 (s), 135.3 (s), 133.6 (s), 132.6 (s), 132.2 (s), 130.7 (d), 130.0 (d, 2C), 128.8 (s), 128.6 (d), 128.0 (d), 127.5 (d, 2C), 126.8 (d), 124.4 (d), 123.2 (s), 121.1 (s), 113.2 (s), 39.0 (q), 21.5 (q), 14.7 (q), 13.7 (q) ppm; IR (reflection)  $\tilde{\nu}$  = 3331, 2921, 2731, 1690, 1619, 1596, 1563, 1480, 1392, 1334, 1310, 1270, 1239, 1213, 1186, 1155, 1084, 1021, 998, 899, 876, 861, 825, 803, 787, 762, 754, 731, 718, 674, 656, 638, 607  $\text{cm}^{-1}$ ; HRMS (DART) ( $m/z$ ) [ $\text{M}+\text{H}$ ] $^+$   $\text{C}_{25}\text{H}_{24}^{35}\text{ClN}_2\text{O}_3\text{S}$  calcd for 467.1191, found 467.1199.

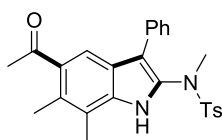

***N*-(5-acetyl-6,7-dimethyl-3-phenyl-1*H*-indol-2-yl)-*N*,4-dimethylbenzenesulfonamide (4d)**

Yield: 37 mg, 42%; white solid, mp 249-251 °C;  $R_f$  = 0.38 (EA/PE = 1/4);  $^1\text{H}$  NMR (500 MHz,  $\text{CDCl}_3$ )  $\delta$  8.57 (brs, 1H), 7.57 (s, 1H), 7.48 (d,  $J$  = 8.5 Hz, 2H), 7.20 (d,  $J$  = 8.0 Hz, 2H), 7.16 (t,  $J$  = 7.5 Hz, 1H), 7.08 (t,  $J$  = 8.0 Hz, 2H), 6.54 (d,  $J$  = 7.0 Hz, 2H), 2.97 (s, 3H), 2.47 (s, 3H), 2.45 (s, 3H), 2.39 (s, 6H) ppm;  $^{13}\text{C}$  NMR (125 MHz,  $\text{CDCl}_3$ )  $\delta$  203.1 (s), 144.5 (s), 134.6 (s), 133.9 (s), 133.5 (s), 132.6 (s), 130.9 (s), 130.3 (s), 129.9 (d, 2C), 129.2 (d, 2C), 128.3 (d, 2C), 127.6 (d, 2C), 127.0 (d), 123.2 (s), 119.6 (s), 118.8 (d), 112.5 (s), 38.4 (q), 30.2 (q), 21.6 (q), 16.7 (q), 13.6 (q) ppm; IR (reflection)  $\tilde{\nu}$  = 3345, 2923, 1668, 1620, 1599, 1565, 1495, 1470, 1414, 1346, 1307, 1257, 1216, 1185, 1152, 1116, 1086, 1074, 1019, 987, 919, 875, 802, 789, 756, 712, 692, 672, 661, 633  $\text{cm}^{-1}$ ; HRMS (DART) ( $m/z$ ) [ $\text{M}+\text{H}$ ] $^+$   $\text{C}_{26}\text{H}_{27}\text{N}_2\text{O}_3\text{S}$  calcd for 447.1737, found 447.1740.

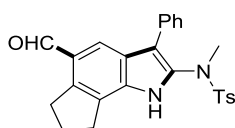

***N*-(5-formyl-3-phenyl-1,6,7,8-tetrahydrocyclopenta[*g*]indol-2-yl)-*N*,4-dimethylbenzenesulfonamide (4e)**

Yield: 88 mg, 99%; white solid, mp 215-217 °C;  $R_f$  = 0.35 (EA/PE = 1/4);  $^1\text{H}$  NMR (400 MHz, DMSO- $d_6$ )  $\delta$  11.83 (s, 1H), 10.00 (s, 1H), 7.87 (s, 1H), 7.42 (d,  $J$  = 8.0 Hz, 2H), 7.32-7.26 (m, 3H), 7.24 (d,  $J$  = 8.0 Hz, 2H), 7.21-7.18 (m, 2H), 3.27 (t,  $J$  = 7.6 Hz, 2H), 3.21 (s, 3H), 3.06-3.01 (m, 2H), 2.37 (s, 3H), 2.22-2.13 (m, 2H) ppm;  $^{13}\text{C}$  NMR (75 MHz, DMSO- $d_6$ )  $\delta$  193.3 (d), 144.2 (s), 140.0 (s), 135.2 (s), 134.0 (s), 133.3 (s), 132.0 (s), 130.1 (d, 2C), 129.3 (d, 2C), 128.9 (d, 2C), 127.9 (d), 127.8 (d, 2C), 127.0 (d), 126.7 (d), 125.0 (s), 124.7 (d), 115.0 (s), 32.4 (q), 30.0 (t), 29.8 (t), 25.4 (t), 21.5 (q) ppm; IR (reflection)  $\tilde{\nu}$  = 3323, 2946, 2733, 1741, 1672, 1636, 1599, 1576, 1497,

1476, 1454, 1435, 1422, 1378, 1336, 1305, 1252, 1185, 1156, 1089, 1074, 1028, 1002, 991, 949, 877, 862, 808, 774, 757, 739, 714, 695, 661, 643, 615  $\text{cm}^{-1}$ ; HRMS (DART) ( $m/z$ )  $[\text{M}+\text{H}]^+$   $\text{C}_{26}\text{H}_{25}\text{N}_2\text{O}_3\text{S}$  calcd for 445.1580, found 445.1581.

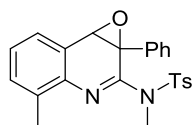

***N*-(4-methyl-1a-phenyl-1a,7b-dihydrooxireno[2,3-c]quinolin-2-yl)benzenesulfonamide (5a)**

Yield: 74 mg, 88%; white solid, mp 100-102 °C;  $R_f$  = 0.26 (EA/PE = 1/10);  $^1\text{H}$  NMR (300 MHz,  $\text{CDCl}_3$ )  $\delta$  7.65 (d,  $J$  = 8.1 Hz, 2H), 7.48-7.42 (m, 2H), 7.40-7.27 (m, 4H), 7.26-7.22 (m, 1H), 7.20-7.10 (m, 3H), 4.10 (s, 1H), 2.89 (s, 3H), 2.33 (s, 3H), 2.29 (s, 3H) ppm;  $^{13}\text{C}$  NMR (75 MHz,  $\text{CDCl}_3$ )  $\delta$  154.6 (s), 143.8 (s), 139.6 (s), 137.7 (s), 136.4 (s), 135.0 (s), 131.8 (d), 129.3 (d, 2C), 128.4 (d, 2C), 128.4 (d, 2C), 127.9 (d), 127.5 (d), 127.0 (d), 126.0 (d, 2C), 124.3 (s), 67.3 (d), 62.3 (s), 35.6 (q), 21.6 (q), 17.9 (q) ppm; IR (reflection)  $\tilde{\nu}$  = 2920, 1599, 1579, 1495, 1450, 1351, 1292, 1251, 1160, 1089, 1073, 1021, 948, 898, 840, 808, 762, 731, 699, 682, 663, 620  $\text{cm}^{-1}$ ; HRMS (DART) ( $m/z$ )  $[\text{M}+\text{H}]^+$   $\text{C}_{24}\text{H}_{23}\text{N}_2\text{O}_3\text{S}$  calcd for 419.1424, found 419.1430.

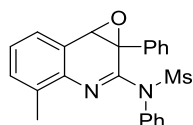

***N*-(4-methyl-1a-phenyl-1a,7b-dihydrooxireno[2,3-c]quinolin-2-yl)-*N*-phenylmethanesulfonamide (5b)**

Yield: 65 mg, 81%; white solid, mp 185-187 °C;  $R_f$  = 0.19 (EA/PE = 1/15);  $^1\text{H}$  NMR (500 MHz,  $\text{CDCl}_3$ )  $\delta$  7.34 (d,  $J$  = 7.5 Hz, 2H), 7.20-7.17 (m, 1H), 7.15-7.11 (m, 2H), 7.10-7.02 (m, 4H), 6.93 (brs, 2H), 6.76 (d,  $J$  = 7.5 Hz, 2H), 4.10 (s, 1H), 3.42 (s, 3H), 2.57 (s, 3H) ppm;  $^{13}\text{C}$  NMR (125 MHz,  $\text{CDCl}_3$ )  $\delta$  154.3 (s), 139.5 (s), 137.2 (s), 135.9 (s), 134.7 (s), 132.1 (d), 129.4 (d, 2C), 128.6 (d, 2C), 128.2 (d), 128.0 (d, 2C), 127.9 (d), 127.3 (d), 127.1 (d), 125.6 (d, 2C), 124.3 (s), 66.4 (d), 62.3 (s), 40.3 (q), 18.5 (q) ppm; IR (reflection)  $\tilde{\nu}$  = 3032, 2923, 1738, 1612, 1580, 1492, 1473, 1449, 1351, 1316, 1278, 1205, 1163, 1152, 1111, 1077, 1030, 969, 940, 889, 858, 842, 810, 781, 768, 742, 691, 610  $\text{cm}^{-1}$ ; HRMS (ESI) ( $m/z$ )  $[\text{M}+\text{H}]^+$   $\text{C}_{23}\text{H}_{21}\text{N}_2\text{O}_3\text{S}$  calcd for 405.1267, found 405.1260.

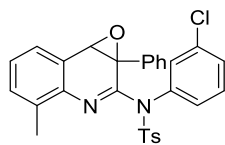

***N*-(3-chlorophenyl)-4-methyl-*N*-(4-methyl-1a-phenyl-1a,7b-dihydrooxireno[2,3-c]quinolin-2-yl)benzenesulfonamide (5c)**

Yield: 58 mg, 56%; white solid, mp 166-169 °C;  $R_f$  = 0.28 (EA/PE = 1/15);  $^1\text{H}$  NMR (500 MHz,  $\text{CDCl}_3$ )  $\delta$  7.65 (d,  $J$  = 8.5 Hz, 2H), 7.29 (d,  $J$  = 7.5 Hz, 2H), 7.22 (t,  $J$  = 7.5 Hz, 1H), 7.19-7.09 (m, 5H), 7.13-7.10 (m, 1H), 6.98 (t,  $J$  = 8.0 Hz, 3H), 6.69 (t,  $J$  = 2.0 Hz, 1H), 6.63 (dd,  $J$  = 1.0, 8.0 Hz, 1H), 4.07 (s, 1H), 2.42 (s, 3H), 2.34 (s, 3H) ppm;  $^{13}\text{C}$  NMR (125 MHz,  $\text{CDCl}_3$ )  $\delta$  153.3 (s), 143.9 (s), 139.7 (s), 137.7 (s), 137.5 (s), 137.0 (s), 134.9 (s), 134.0 (s), 132.1 (d), 130.3 (d), 129.1 (d, 2C), 129.0 (d), 128.5 (d, 2C), 128.2 (d, 4C), 128.1 (d), 127.8 (d), 127.3 (d), 127.1 (d), 125.6 (d), 124.4 (s), 66.3 (d), 62.4 (s), 21.6 (q), 19.0 (q) ppm; IR (reflection)  $\tilde{\nu}$  = 3030, 1609, 1572, 1495, 1466, 1448, 1432, 1363,

1289, 1251, 1203, 1168, 1092, 1079, 1042, 981, 953, 909, 889, 862, 845, 812, 783, 768, 752, 708, 699, 678, 666, 647  $\text{cm}^{-1}$ ; HRMS (DART) ( $m/z$ )  $[\text{M}+\text{H}]^+$   $\text{C}_{29}\text{H}_{24}^{35}\text{ClN}_2\text{O}_3\text{S}$  calcd for 515.1191, found 515.1200.

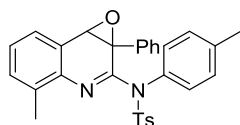

**4-methyl-N-(4-methyl-1a-phenyl-1a,7b-dihydrooxireno[2,3-c]quinolin-2-yl)-N-(p-tolyl)benzenesulfonamide (5e)**

Yield: 54 mg, 60%; yellow solid, mp 190-191  $^{\circ}\text{C}$ ;  $R_f = 0.33$  (EA/PE = 1/10);  $^1\text{H}$  NMR (500 MHz,  $\text{CDCl}_3$ )  $\delta$  7.64 (d,  $J = 8.5$  Hz, 2H), 7.26 (d,  $J = 7.5$  Hz, 2H), 7.18-7.09 (m, 6H), 6.99 (s, 2H), 6.81 (d,  $J = 8.0$  Hz, 2H), 6.56 (d,  $J = 8.0$  Hz, 2H), 4.01 (s, 1H), 2.41 (s, 3H), 2.32 (s, 3H), 2.22 (s, 3H) ppm;  $^{13}\text{C}$  NMR (125 MHz,  $\text{CDCl}_3$ )  $\delta$  153.7 (s), 143.5 (s), 139.9 (s), 138.1 (s), 137.5 (s), 137.3 (s), 135.4 (s), 133.6 (s), 132.0 (d), 129.8 (d, 2C), 128.93 (d, 2C), 128.88 (d, 2C), 128.6 (d, 2C), 128.0 (d, 2C), 127.8 (d), 127.01 (d), 126.98 (d), 125.7 (d, 2C), 124.3 (s), 66.3 (d), 62.4 (s), 21.6 (q), 21.2 (q), 19.0 (q) ppm; IR (reflection)  $\tilde{\nu} = 3032, 2951, 2925, 1896, 1609, 1576, 1506, 1466, 1449, 1348, 1320, 1299, 1279, 1255, 1209, 1162, 1090, 1077, 1045, 951, 903, 869, 843, 817, 764, 719, 696, 681, 665, 616$   $\text{cm}^{-1}$ ; HRMS (DART) ( $m/z$ )  $[\text{M}+\text{H}]^+$   $\text{C}_{30}\text{H}_{27}\text{N}_2\text{O}_3\text{S}$  calcd for 495.1737, found 495.1744.

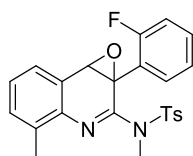

**N-(1a-(2-fluorophenyl)-4-methyl-1a,7b-dihydrooxireno[2,3-c]quinolin-2-yl)-N,4-dimethylbenzenesulfonamide (5f)**

Yield: 67 mg, 77%; white solid, mp 173-175  $^{\circ}\text{C}$ ;  $R_f = 0.24$  (EA/PE = 1/10);  $^1\text{H}$  NMR (500 MHz,  $\text{CDCl}_3$ )  $\delta$  7.66 (t,  $J = 7.5$  Hz, 1H), 7.43 (d,  $J = 8.0$  Hz, 2H), 7.35 (d,  $J = 7.0$  Hz, 1H), 7.31-7.26 (m, 1H), 7.24 (d,  $J = 7.5$  Hz, 1H), 7.20-7.15 (m, 2H), 7.13 (d,  $J = 8.5$  Hz, 2H), 6.95 (t,  $J = 10.0$  Hz, 1H), 4.17 (s, 1H), 2.90 (s, 3H), 2.31 (s, 3H), 2.21 (s, 3H) ppm;  $^{13}\text{C}$  NMR (125 MHz,  $\text{CDCl}_3$ )  $\delta$  160.8 (d,  $J_{\text{C-F}} = 243.9$  Hz), 155.2 (s), 144.0 (s), 139.5 (s), 137.9 (s), 133.0 (s), 131.7 (d), 129.9 (d,  $J_{\text{C-F}} = 8.0$  Hz), 129.2 (d, 2C), 128.6 (d, 2C), 128.2 (d,  $J_{\text{C-F}} = 3.4$  Hz), 127.7 (d), 127.0 (d), 124.8 (d,  $J_{\text{C-F}} = 13.1$  Hz), 124.3 (s), 124.2 (d,  $J_{\text{C-F}} = 3.1$  Hz), 114.6 (d,  $J_{\text{C-F}} = 20.3$  Hz), 65.9 (d), 60.9 (s), 36.5 (q), 21.6 (q), 17.5 (q) ppm;  $^{19}\text{F}$  NMR (471 MHz,  $\text{CDCl}_3$ )  $\delta$  -12.14 ppm; IR (reflection)  $\tilde{\nu} = 2946, 1929, 1736, 1596, 1579, 1491, 1458, 1420, 1341, 1319, 1296, 1260, 1249, 1233, 1211, 1188, 1177, 1156, 1115, 1103, 1085, 1018, 967, 953, 902, 882, 837, 807, 761, 726, 708, 660, 616$   $\text{cm}^{-1}$ ; HRMS (DART) ( $m/z$ )  $[\text{M}+\text{H}]^+$   $\text{C}_{24}\text{H}_{22}\text{FN}_2\text{O}_3\text{S}$  calcd for 437.1330, found 437.1335.

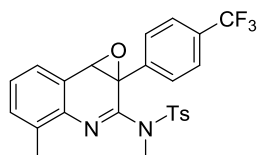

**N,4-dimethyl-N-(4-methyl-1a-(4-(trifluoromethyl)phenyl)-1a,7b-dihydrooxireno[2,3-c]quinolin-2-yl)benzenesulfonamide (5g)**

Yield: 94 mg, 97%; white solid, mp 136-139  $^{\circ}\text{C}$ ;  $R_f = 0.31$  (EA/PE = 1/10);  $^1\text{H}$  NMR (300 MHz,  $\text{CDCl}_3$ )  $\delta$  7.59 (d,  $J = 8.7$  Hz, 2H), 7.53 (dd,  $J = 2.4, 9.0$  Hz, 4H), 7.33 (dd,  $J = 0.9, 7.2$  Hz, 1H), 7.26 (d,  $J = 7.5$  Hz, 1H), 7.19-7.12 (m, 3H), 4.09 (s, 1H), 2.93 (s, 3H), 2.32 (s, 3H), 2.27 (s, 3H)

ppm;  $^{13}\text{C}$  NMR (75 MHz,  $\text{CDCl}_3$ )  $\delta$  153.8 (s), 144.2 (s), 140.8 (q,  $J_{\text{C-F}} = 1.3$  Hz), 139.4 (s), 137.9 (s), 133.9 (s), 132.0 (d), 129.9 (q,  $J_{\text{C-F}} = 32.2$  Hz), 129.3 (d, 2C), 128.4 (d, 2C), 127.8 (d), 127.1 (d), 126.5 (d, 2C), 125.3 (q,  $J_{\text{C-F}} = 3.8$  Hz, 2C), 124.1 (q,  $J_{\text{C-F}} = 270.0$  Hz), 123.9 (s), 67.5 (d), 62.1 (s), 35.9 (q), 21.6 (q), 17.7 (q) ppm; IR (reflection)  $\tilde{\nu} = 1609, 1598, 1578, 1461, 1409, 1385, 1324, 1279, 1232, 1185, 1164, 1152, 1117, 1106, 1087, 1065, 1023, 1014, 945, 898, 881, 849, 826, 809, 758, 744, 731, 711, 694, 659, 620, 610$   $\text{cm}^{-1}$ ; HRMS (DART) ( $m/z$ )  $[\text{M}+\text{H}]^+$   $\text{C}_{25}\text{H}_{22}\text{F}_3\text{N}_2\text{O}_3\text{S}$  calcd for 487.1298, found 487.1304.

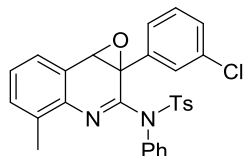

***N*-(1a-(3-chlorophenyl)-4-methyl-1a,7b-dihydrooxireno[2,3-c]quinolin-2-yl)-4-methyl-*N*-phenylbenzenesulfonamide (5h)**

Yield: 70 mg, 68%; white solid, mp 206-209 °C;  $R_f = 0.28$  (EA/PE = 1/10);  $^1\text{H}$  NMR (500 MHz,  $\text{CDCl}_3$ )  $\delta$  7.64 (d,  $J = 9.5$  Hz, 2H), 7.29-7.25 (m, 2H), 7.19-7.10 (m, 6H), 7.09-6.98 (m, 3H), 6.73 (d,  $J = 8.0$  Hz, 2H), 6.69 (brs, 1H), 4.03 (s, 1H), 2.41 (s, 3H), 2.32 (s, 3H) ppm;  $^{13}\text{C}$  NMR (125 MHz,  $\text{CDCl}_3$ )  $\delta$  152.9 (s), 143.7 (s), 139.8 (s), 137.7 (s), 137.4 (s), 137.1 (s), 136.3 (s), 134.2 (s), 132.3 (d), 130.0 (d, 2C), 129.4 (d), 129.0 (d, 2C), 128.53 (d, 2C), 128.47 (d, 2C), 128.2 (d), 128.0 (d), 127.2 (d), 127.1 (d), 125.3 (d), 124.6 (d), 123.9 (s), 66.2 (d), 61.8 (s), 21.6 (q), 19.0 (q) ppm; IR (reflection)  $\tilde{\nu} = 3071, 3042, 3026, 2954, 2921, 1923, 1879, 1810, 1611, 1597, 1573, 1490, 1476, 1424, 1360, 1302, 1281, 1255, 1237, 1202, 1189, 1166, 1111, 1092, 1079, 1032, 974, 947, 909, 893, 861, 838, 816, 784, 774, 757, 740, 708, 691, 667, 648$   $\text{cm}^{-1}$ ; HRMS (DART) ( $m/z$ )  $[\text{M}+\text{H}]^+$   $\text{C}_{29}\text{H}_{24}^{35}\text{ClN}_2\text{O}_3\text{S}$  calcd for 515.1191, found 515.1206.

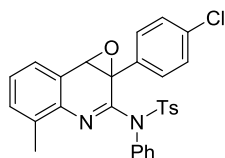

***N*-(1a-(4-chlorophenyl)-4-methyl-1a,7b-dihydrooxireno[2,3-c]quinolin-2-yl)-4-methyl-*N*-phenylbenzenesulfonamide (5i)**

Yield: 75 mg, 73%; white solid, mp 179-180 °C;  $R_f = 0.47$  (EA/PE = 1/10);  $^1\text{H}$  NMR (500 MHz,  $\text{CDCl}_3$ )  $\delta$  7.62 (d,  $J = 8.5$  Hz, 2H), 7.28 (d,  $J = 7.5$  Hz, 2H), 7.17-7.13 (m, 4H), 7.12-7.09 (m, 2H), 7.07 (t,  $J = 8.0$  Hz, 2H), 6.97-6.92 (m, 2H), 6.75 (d,  $J = 8.0$  Hz, 2H), 4.01 (s, 1H), 2.40 (s, 3H), 2.32 (s, 3H) ppm;  $^{13}\text{C}$  NMR (125 MHz,  $\text{CDCl}_3$ )  $\delta$  153.1 (s), 143.7 (s), 139.8 (s), 137.7 (s), 137.1 (s), 136.3 (s), 133.91 (s), 133.88 (s), 132.2 (d), 129.8 (d, 2C), 129.0 (d, 2C), 128.9 (d), 128.5 (d, 4C), 128.2 (d, 2C), 128.1 (d), 127.2 (d), 127.0 (d, 2C), 124.1 (s), 66.4 (d), 62.0 (s), 21.6 (q), 19.0 (q) ppm; IR (reflection)  $\tilde{\nu} = 3052, 2952, 2919, 1611, 1596, 1580, 1490, 1455, 1402, 1378, 1360, 1309, 1291, 1269, 1255, 1199, 1168, 1111, 1089, 1044, 1013, 965, 942, 915, 899, 869, 843, 817, 773, 763, 745, 703, 692, 667, 649, 630, 613$   $\text{cm}^{-1}$ ; HRMS (DART) ( $m/z$ )  $[\text{M}+\text{H}]^+$   $\text{C}_{29}\text{H}_{24}^{35}\text{ClN}_2\text{O}_3\text{S}$  calcd for 515.1191, found 515.1200.

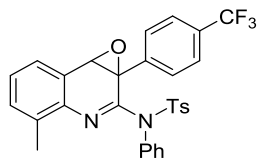

**4-methyl-*N*-(4-methyl-1a-(4-(trifluoromethyl)phenyl)-1a,7b-dihydrooxireno[2,3-c]quinolin-2-**

**yl)-N-phenylbenzenesulfonamide (5j)**

Yield: 86 mg, 78%; white solid, mp 147-149 °C;  $R_f = 0.36$  (EA/PE = 1/10);  $^1\text{H NMR}$  (500 MHz,  $\text{CDCl}_3$ )  $\delta$  7.62 (d,  $J = 8.5$  Hz, 2H), 7.39 (d,  $J = 7.0$  Hz, 2H), 7.29 (dd,  $J = 2.5, 7.5$  Hz, 2H), 7.25-7.06 (m, 6H), 7.03 (t,  $J = 8.0$  Hz, 2H), 6.70 (d,  $J = 8.0$  Hz, 2H), 4.05 (s, 1H), 2.41 (s, 3H), 2.32 (s, 3H) ppm;  $^{13}\text{C NMR}$  (125 MHz,  $\text{CDCl}_3$ )  $\delta$  152.6 (s), 143.8 (s), 139.8 (s), 139.2 (s), 137.8 (s), 137.1 (s), 136.3 (s), 132.3 (d), 130.1 (q,  $J_{C-F} = 32.3$  Hz), 129.8 (d, 2C), 129.0 (d, 2C), 128.49 (d, 2C), 128.47 (d, 2C), 128.1 (d), 127.3 (d), 127.1 (d), 126.0 (d, 2C), 125.0 (q,  $J_{C-F} = 3.8$  Hz, 2C), 124.0 (q,  $J_{C-F} = 270.5$  Hz), 123.8 (s), 66.3 (d), 62.0 (s), 21.6 (q), 19.0 (q) ppm; IR (reflection)  $\tilde{\nu} = 2924, 1619, 1595, 1575, 1491, 1469, 1412, 1361, 1323, 1279, 1250, 1165, 1115, 1092, 1066, 1043, 1017, 974, 943, 899, 868, 829, 811, 775, 763, 744, 722, 705, 696, 667, 650, 608$   $\text{cm}^{-1}$ ; HRMS (DART) ( $m/z$ )  $[\text{M}+\text{H}]^+$   $\text{C}_{30}\text{H}_{24}\text{FN}_2\text{O}_3\text{S}$  calcd for 549.1454, found 549.1464.

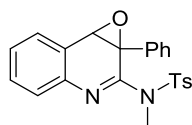**N,4-dimethyl-N-(1a-phenyl-1a,7b-dihydrooxireno[2,3-c]quinolin-2-yl)benzenesulfonamide (5k)**

Yield: 39 mg, 48%; white solid, mp 172-175 °C;  $R_f = 0.20$  (EA/PE = 1/10);  $^1\text{H NMR}$  (300 MHz,  $\text{CDCl}_3$ )  $\delta$  7.75 (d,  $J = 7.8$  Hz, 2H), 7.54-7.38 (m, 5H), 7.38-7.17 (m, 6H), 4.10 (s, 1H), 2.86 (s, 3H), 2.34 (s, 3H) ppm;  $^{13}\text{C NMR}$  (75 MHz,  $\text{CDCl}_3$ )  $\delta$  154.6 (s), 143.0 (s), 140.5 (s), 135.0 (s), 134.2 (s), 129.2 (d), 128.23 (d), 128.16 (d, 2C), 127.9 (d, 3C), 127.5 (d, 2C), 127.1 (d), 126.7 (d), 124.8 (d, 2C), 123.2 (s), 65.8 (d), 61.0 (s), 34.2 (q), 20.6 (q) ppm; IR (reflection)  $\tilde{\nu} = 3059, 3020, 2945, 2923, 1595, 1569, 1485, 1461, 1449, 1359, 1322, 1306, 1246, 1225, 1182, 1164, 1103, 1089, 1074, 1023, 956, 909, 886, 856, 816, 800, 766, 748, 698, 687, 665, 618$   $\text{cm}^{-1}$ ; HRMS (DART) ( $m/z$ )  $[\text{M}+\text{H}]^+$   $\text{C}_{23}\text{H}_{21}\text{N}_2\text{O}_3\text{S}$  calcd for 405.1267, found 405.1268.

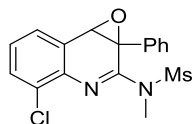**N-(4-chloro-1a-phenyl-1a,7b-dihydrooxireno[2,3-c]quinolin-2-yl)-N-methylmethanesulfonamide (5l)**

Yield: 71 mg, 98%; white solid, mp 192-194 °C;  $R_f = 0.13$  (EA/PE = 1/15);  $^1\text{H NMR}$  (500 MHz,  $\text{CDCl}_3$ )  $\delta$  7.51 (dd,  $J = 1.0, 8.0$  Hz, 1H), 7.50-7.47 (m, 2H), 7.41 (dd,  $J = 1.5, 7.5$  Hz, 1H), 7.38-7.34 (m, 2H), 7.33-7.29 (m, 1H), 7.19 (dd,  $J = 8.0, 9.5$  Hz, 1H), 4.16 (s, 1H), 3.45 (s, 3H), 2.85 (s, 3H) ppm;  $^{13}\text{C NMR}$  (125 MHz,  $\text{CDCl}_3$ )  $\delta$  156.7 (s), 138.0 (s), 134.4 (s), 133.6 (s), 131.4 (d), 128.9 (d, 2C), 128.8 (d), 127.94 (d), 127.87 (d), 125.8 (s), 125.7 (d, 2C), 66.6 (d), 61.9 (s), 41.1 (q), 34.8 (q) ppm; IR (reflection)  $\tilde{\nu} = 3059, 3020, 1965, 1602, 1561, 1494, 1450, 1347, 1310, 1285, 1238, 1192, 1164, 1124, 1068, 1035, 970, 878, 861, 836, 808, 782, 764, 755, 724, 698, 686, 670, 623$   $\text{cm}^{-1}$ ; HRMS (DART) ( $m/z$ )  $[\text{M}+\text{H}]^+$   $\text{C}_{17}\text{H}_{16}^{35}\text{ClN}_2\text{O}_3\text{S}$  calcd for 363.0565, found 363.0569.

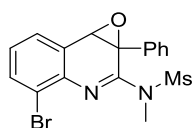**N-(4-bromo-1a-phenyl-1a,7b-dihydrooxireno[2,3-c]quinolin-2-yl)-N-**

**methylmethanesulfonamide (5m)**

Yield: 65 mg, 80%; white solid, mp 189-191 °C;  $R_f = 0.12$  (EA/PE = 1/2);  $^1\text{H NMR}$  (500 MHz,  $\text{CDCl}_3$ )  $\delta$  7.70 (dd,  $J = 1.0, 8.0$  Hz, 1H), 7.48 (d,  $J = 7.0$  Hz, 2H), 7.45 (d,  $J = 7.5$  Hz, 1H), 7.36 (t,  $J = 7.0$  Hz, 2H), 7.33-7.30 (m, 1H), 7.12 (t,  $J = 8.0$  Hz, 1H), 4.14 (s, 1H), 3.47 (s, 3H), 2.84 (s, 3H) ppm;  $^{13}\text{C NMR}$  (125 MHz,  $\text{CDCl}_3$ )  $\delta$  156.9 (s), 139.2 (s), 134.6 (d), 134.4 (s), 128.9 (d, 2C), 128.8 (d), 128.7 (d), 128.3(d), 125.8 (s), 125.6 (d, 2C), 124.5 (s), 66.7 (d), 62.0 (s), 41.0 (q), 34.8 (q) ppm; IR (reflection)  $\tilde{\nu} = 3057, 3019, 1963, 1600, 1557, 1494, 1446, 1347, 1310, 1238, 1188, 1163, 1128, 1068, 1034, 967, 912, 876, 862, 830, 805, 781, 764, 755, 722, 697, 685, 658, 621$   $\text{cm}^{-1}$ ; HRMS (DART) ( $m/z$ )  $[\text{M}+\text{H}]^+$   $\text{C}_{17}\text{H}_{16}^{79}\text{BrN}_2\text{O}_3\text{S}$  calcd for 407.0060, found 407.0065.

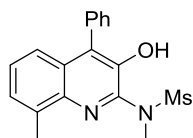***N*-(3-hydroxy-8-methyl-4-phenylquinolin-2-yl)-*N*-methylmethanesulfonamide (6a)**

Yield: 66 mg, 97%; white solid, mp 195-197 °C;  $R_f = 0.25$  (EA/PE = 1/5);  $^1\text{H NMR}$  (500 MHz,  $\text{CDCl}_3$ )  $\delta$  7.46 (t,  $J = 7.0$  Hz, 2H), 7.42-7.36 (m, 1H), 7.35 (d,  $J = 6.5$  Hz, 3H), 7.32 (d,  $J = 8.0$  Hz, 1H), 7.24 (dd,  $J = 6.5$  Hz, 8.0 Hz, 1H), 6.49 (s, 1H), 3.36 (s, 3H), 3.13 (s, 3H), 2.67 (s, 3H) ppm;  $^{13}\text{C NMR}$  (125 MHz,  $\text{CDCl}_3$ )  $\delta$  143.5 (s), 142.8 (s), 141.1 (s), 136.7 (s), 133.4 (s), 133.3 (s), 130.3 (d, 2C), 128.9 (s), 128.6 (d, 2C), 128.4 (d), 127.54 (d), 127.47 (d), 123.3 (d), 38.2 (q), 35.2 (q), 18.1 (q) ppm; IR (reflection)  $\tilde{\nu} = 3391, 1593, 1509, 1493, 1450, 1431, 1407, 1397, 1356, 1336, 1322, 1241, 1229, 1194, 1164, 1149, 1122, 1088, 1071, 1052, 972, 915, 857, 815, 790, 765, 748, 704, 684, 661, 644, 611$   $\text{cm}^{-1}$ ; HRMS (DART) ( $m/z$ )  $[\text{M}+\text{H}]^+$   $\text{C}_{18}\text{H}_{19}\text{N}_2\text{O}_3\text{S}$  calcd for 343.1111, found 343.1115.

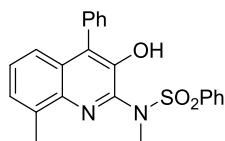***N*-(3-hydroxy-8-methyl-4-phenylquinolin-2-yl)-*N*-methylbenzenesulfonamide (6b)**

Yield: 77 mg, 96%; white solid, mp 206-207 °C;  $R_f = 0.21$  (EA/PE = 1/10);  $^1\text{H NMR}$  (500 MHz,  $\text{CDCl}_3$ )  $\delta$  7.61 (d,  $J = 7.5$  Hz, 2H), 7.56 (t,  $J = 7.5$  Hz, 1H), 7.47 (t,  $J = 7.0$  Hz, 2H), 7.43-7.36 (m, 5H), 7.31 (d,  $J = 8.5$  Hz, 1H), 7.24 (d,  $J = 6.5$  Hz, 1H), 7.20 (t,  $J = 8.5$  Hz, 1H), 6.78 (s, 1H), 3.22 (s, 3H), 2.21 (s, 3H) ppm;  $^{13}\text{C NMR}$  (125 MHz,  $\text{CDCl}_3$ )  $\delta$  143.3 (s), 143.1 (s), 140.8 (s), 137.0 (s), 135.1 (s), 133.7 (s), 133.4 (d), 133.1 (s), 130.4 (d, 2C), 128.9 (d, 2C), 128.7 (d, 2C; s, 1C), 128.5 (d, 2C), 128.3 (d), 127.3 (d), 127.2 (d), 123.1 (d), 38.1 (q), 17.5 (q) ppm; IR (reflection)  $\tilde{\nu} = 3384, 3071, 2971, 2943, 1593, 1578, 1509, 1489, 1462, 1447, 1427, 1398, 1348, 1314, 1292, 1277, 1240, 1228, 1186, 1164, 1131, 1087, 1065, 1046, 1028, 999, 982, 910, 849, 826, 814, 782, 765, 756, 733, 718, 699, 687, 663, 646, 628$   $\text{cm}^{-1}$ ; HRMS (DART) ( $m/z$ )  $[\text{M}+\text{H}]^+$   $\text{C}_{23}\text{H}_{21}\text{N}_2\text{O}_3\text{S}$  calcd for 405.1267, found 405.1274.

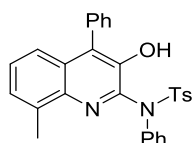***N*-(3-hydroxy-8-methyl-4-phenylquinolin-2-yl)-4-methyl-*N*-phenylbenzenesulfonamide (6c)**

Yield: 73 mg, 76%; light yellow solid, mp 200-202 °C;  $R_f = 0.15$  (EA/PE = 1/15);  $^1\text{H NMR}$  (500 MHz,  $\text{CDCl}_3$ )  $\delta$  7.58 (d,  $J = 8.0$  Hz, 2H), 7.56-7.51 (m, 2H), 7.48-7.43 (m, 2H), 7.42-7.38 (m, 1H),



7.36-7.32 (m, 2H), 7.30 (t,  $J = 8.0$  Hz, 2H), 7.26-7.22 (m, 4H), 7.20 (d,  $J = 8.5$  Hz, 2H), 6.26 (s, 1H), 2.47 (s, 3H), 2.40 (s, 3H) ppm;  $^{13}\text{C}$  NMR (125 MHz,  $\text{CDCl}_3$ )  $\delta$  144.1 (s), 143.3 (s), 142.7 (s), 141.1 (s), 138.9 (s), 137.2 (s), 135.2 (s), 133.2 (s), 132.5 (s), 130.3 (d, 2C), 129.5 (d, 2C), 129.4 (d, 2C), 129.02 (d, 4C), 128.97 (s), 128.7 (d, 2C), 128.49 (d), 128.48 (d), 127.5 (d), 127.3 (d), 123.1 (d), 21.7 (q), 18.2 (q) ppm; IR (reflection)  $\tilde{\nu} = 3438, 3059, 2923, 1596, 1490, 1453, 1401, 1355, 1247, 1214, 1184, 1152, 1131, 1089, 1060, 1029, 1019, 980, 937, 913, 852, 812, 783, 766, 745, 732, 698, 672, 656, 634, 615$   $\text{cm}^{-1}$ ; HRMS (DART) ( $m/z$ )  $[\text{M}+\text{H}]^+$   $\text{C}_{29}\text{H}_{25}\text{N}_2\text{O}_3\text{S}$  calcd for 481.1580, found 481.1588.

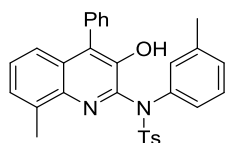

***N*-(4-hydroxy-8-methyl-3-phenylquinolin-2-yl)-4-methyl-*N*-(*m*-tolyl)benzenesulfonamide (6d)**

Yield: 64 mg, 65%; light yellow solid, mp 206-208 °C;  $R_f = 0.15$  (EA/PE = 1/15);  $^1\text{H}$  NMR (300 MHz,  $\text{CDCl}_3$ )  $\delta$  7.58 (d,  $J = 8.4$  Hz, 2H), 7.48-7.26 (m, 9H), 7.21 (t,  $J = 7.8$  Hz, 3H), 7.21 (t,  $J = 7.5$  Hz, 1H), 7.03 (d,  $J = 7.5$  Hz, 1H), 6.27 (s, 1H), 2.46 (s, 3H), 2.39 (s, 3H), 2.22 (s, 3H) ppm;  $^{13}\text{C}$  NMR (75 MHz,  $\text{CDCl}_3$ )  $\delta$  144.0 (s), 143.3 (s), 142.8 (s), 141.1 (s), 139.0 (s), 138.8 (s), 137.2 (s), 135.3 (s), 133.3 (s), 132.4 (s), 130.4 (d), 130.3 (d, 2C), 129.4 (d, 2C), 129.3 (d), 129.0 (d, 2C), 129.0 (s), 128.7 (d), 128.6 (d, 2C), 128.4 (d), 127.4 (d), 127.3 (d), 126.3 (d), 123.1 (d), 21.7 (q), 21.3 (q), 18.2 (q) ppm; IR (reflection)  $\tilde{\nu} = 3459, 3067, 3027, 2948, 2919, 1600, 1509, 1487, 1402, 1388, 1350, 1306, 1282, 1238, 1216, 1163, 1121, 1088, 1060, 1021, 978, 967, 907, 853, 828, 808, 769, 742, 728, 705, 695, 669, 646, 634, 615$   $\text{cm}^{-1}$ ; HRMS (DART) ( $m/z$ )  $[\text{M}+\text{H}]^+$   $\text{C}_{30}\text{H}_{27}\text{N}_2\text{O}_3\text{S}$  calcd for 495.1737, found 495.1747.

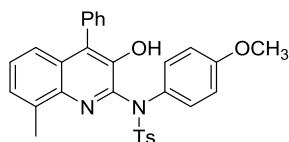

***N*-(3-hydroxy-8-methyl-4-phenylquinolin-2-yl)-*N*-(4-methoxyphenyl)-4-methylbenzenesulfonamide (6e)**

Yield: 77 mg, 76%; white solid, mp 209-211 °C;  $R_f = 0.25$  (EA/PE = 1/5);  $^1\text{H}$  NMR (500 MHz,  $\text{CDCl}_3$ )  $\delta$  7.56 (d,  $J = 8.0$  Hz, 2H), 7.44 (t,  $J = 7.0$  Hz, 4H), 7.38 (t,  $J = 7.5$  Hz, 1H), 7.33 (d,  $J = 7.0$  Hz, 2H), 7.28 (t,  $J = 6.5$  Hz, 2H), 7.20 (t,  $J = 8.0$  Hz, 3H), 6.73 (d,  $J = 9.0$  Hz, 2H), 6.31 (s, 1H), 3.68 (s, 3H), 2.45 (s, 3H), 2.39 (s, 3H) ppm;  $^{13}\text{C}$  NMR (125 MHz,  $\text{CDCl}_3$ )  $\delta$  159.6 (s), 144.0 (s), 143.2 (s), 143.1 (s), 141.1 (s), 137.2 (s), 135.0 (s), 133.3 (s), 132.4 (s), 131.4 (s), 131.1 (d, 2C), 130.3 (d, 2C), 129.5 (d, 2C), 129.0 (d, 2C), 128.9 (s), 128.7 (d, 2C), 128.4 (d), 127.4 (d), 127.3 (d), 123.1 (d), 114.2 (d, 2C), 55.5 (q), 21.7 (q), 18.3 (q) ppm; IR (reflection)  $\tilde{\nu} = 3473, 2996, 2915, 2843, 1736, 1599, 1504, 1464, 1444, 1401, 1387, 1348, 1301, 1253, 1227, 1202, 1161, 1120, 1090, 1058, 1027, 967, 940, 914, 853, 836, 812, 798, 770, 741, 727, 706, 673, 652, 632, 617$   $\text{cm}^{-1}$ ; HRMS (DART) ( $m/z$ )  $[\text{M}+\text{H}]^+$   $\text{C}_{30}\text{H}_{27}\text{N}_2\text{O}_4\text{S}$  calcd for 511.1686, found 511.1697.

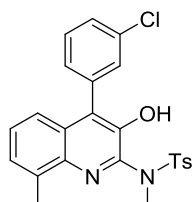

***N*-(4-(3-chlorophenyl)-3-hydroxy-8-methylquinolin-2-yl)-*N*,4-dimethylbenzenesulfonamide (6f)**

Yield: 85 mg, 94%; white solid, mp 187-189 °C;  $R_f = 0.21$  (EA/PE = 1/10);  $^1\text{H}$  NMR (300 MHz,  $\text{CDCl}_3$ )  $\delta$  7.47 (d,  $J = 8.4$  Hz, 2H), 7.41-7.36 (m, 3H), 7.30-7.22 (m, 4H), 7.21-7.17 (m, 2H), 6.92 (s, 1H), 3.20 (s, 3H), 2.36 (s, 3H), 2.23 (s, 3H) ppm;  $^{13}\text{C}$  NMR (75 MHz,  $\text{CDCl}_3$ )  $\delta$  144.5 (s), 143.5 (s), 143.1 (s), 140.7 (s), 137.0 (s), 135.7 (s), 134.4 (s), 131.9 (s), 131.5 (s), 130.4 (d), 129.7 (d), 129.3 (d, 2C), 128.9 (d, 2C), 128.7 (d), 128.4 (d), 128.2 (s), 127.5 (d), 127.3 (d), 122.7 (d), 38.0 (q), 21.6 (q), 17.4 (q) ppm; IR (reflection)  $\tilde{\nu} = 3394, 1733, 1654, 1591, 1561, 1506, 1472, 1446, 1427, 1397, 1346, 1306, 1291, 1238, 1188, 1170, 1160, 1088, 1064, 1045, 1017, 915, 886, 865, 842, 813, 800, 787, 772, 739, 717, 700, 675, 648, 625$   $\text{cm}^{-1}$ ; HRMS (ESI) ( $m/z$ )  $[\text{M}+\text{H}]^+$   $\text{C}_{24}\text{H}_{22}\text{ClN}_2\text{O}_3\text{S}$  calcd for 453.1034, found 453.1041.

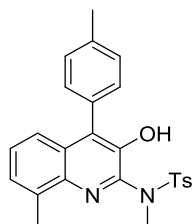

***N*-(3-hydroxy-8-methyl-4-(*p*-tolyl)quinolin-2-yl)-*N*,4-dimethylbenzenesulfonamide (6g)**

Yield: 69 mg, 80%; white solid, mp 186-188 °C;  $R_f = 0.18$  (EA/PE = 1/15);  $^1\text{H}$  NMR (300 MHz,  $\text{CDCl}_3$ )  $\delta$  7.50 (d,  $J = 5.1$  Hz, 2H), 7.34 (dd,  $J = 1.5, 8.1$  Hz, 1H), 7.28 (s, 4H), 7.24 (d,  $J = 5.7$  Hz, 1H), 7.22-7.15 (m, 3H), 6.79 (s, 1H), 3.20 (s, 3H), 2.39 (s, 3H), 2.36 (s, 3H), 2.24 (s, 3H) ppm;  $^{13}\text{C}$  NMR (75 MHz,  $\text{CDCl}_3$ )  $\delta$  144.3 (s), 143.5 (s), 143.1 (s), 140.8 (s), 138.0 (s), 136.9 (s), 133.2 (s), 132.2 (s), 130.7 (s), 130.2 (d, 2C), 129.21 (d, 2C), 129.20 (d, 2C), 128.9 (d, 2C), 128.7 (s), 127.1 (d), 127.0 (d), 123.2 (d), 38.0 (q), 21.6 (q), 21.4 (q), 17.5 (q) ppm; IR (reflection)  $\tilde{\nu} = 3414, 2917, 1733, 1596, 1494, 1461, 1425, 1397, 1348, 1306, 1289, 1244, 1187, 1168, 1159, 1135, 1087, 1060, 1042, 1018, 980, 909, 850, 807, 777, 771, 756, 736, 720, 705, 679, 658, 635, 626$   $\text{cm}^{-1}$ ; HRMS (DART) ( $m/z$ )  $[\text{M}+\text{H}]^+$   $\text{C}_{25}\text{H}_{25}\text{N}_2\text{O}_3\text{S}$  calcd for 433.1580, found 433.1585.

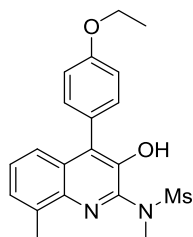

***N*-(4-(4-ethoxyphenyl)-3-hydroxy-8-methylquinolin-2-yl)-*N*-methylmethanesulfonamide (6h)**

Yield: 57 mg, 74%; white solid, mp 212-214 °C;  $R_f = 0.24$  (EA/PE = 1/5);  $^1\text{H}$  NMR (300 MHz,  $\text{CDCl}_3$ )  $\delta$  7.37 (d,  $J = 8.4$  Hz, 1H), 7.34 (d,  $J = 6.6$  Hz, 1H), 7.30-7.20 (m, 3H), 6.97 (d,  $J = 8.7$  Hz, 2H), 6.44 (s, 1H), 4.04 (q,  $J = 7.2$  Hz, 2H), 3.35 (s, 3H), 3.13 (s, 3H), 2.66 (s, 3H), 1.39 (t,  $J = 7.2$  Hz, 3H) ppm;  $^{13}\text{C}$  NMR (75 MHz,  $\text{CDCl}_3$ )  $\delta$  159.1 (s), 143.4 (s), 142.9 (s), 141.1 (s), 136.6 (s), 133.1 (s), 131.6 (d, 2C), 129.1 (s), 127.5 (d), 127.3 (d), 125.1 (s), 123.4 (d), 114.6 (d, 2C), 63.6 (t), 38.1 (q), 35.3 (q), 18.1 (q), 14.9 (q) ppm; IR (reflection)  $\tilde{\nu} = 3417, 3046, 2979, 2936, 2922, 1610, 1570, 1518, 1496, 1474, 1429, 1397, 1359, 1342, 1317, 1301, 1284, 1248, 1232, 1171, 1155, 1141, 1116, 1067, 1045, 952, 910, 832, 808, 786, 777, 744, 734, 722, 691, 656, 640, 621, 606$   $\text{cm}^{-1}$ ; HRMS (DART) ( $m/z$ )  $[\text{M}+\text{H}]^+$   $\text{C}_{20}\text{H}_{23}\text{N}_2\text{O}_4\text{S}$  calcd for 387.1373, found 387.1377.

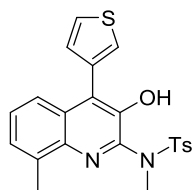

***N*-(3-hydroxy-8-methyl-4-(thiophen-3-yl)quinolin-2-yl)-*N*,4-dimethylbenzenesulfonamide (6i)**

Yield: 76 mg, 92%; white solid, mp 121-123 °C;  $R_f = 0.18$  (EA/PE = 1/10);  $^1\text{H NMR}$  (500 MHz,  $\text{CDCl}_3$ )  $\delta$  7.55-7.51 (m, 1H), 7.50-7.40 (m, 4H), 7.28-7.22 (m, 3H), 7.19 (d,  $J = 8.0$  Hz, 2H), 6.90 (s, 1H), 3.19 (s, 3H), 2.36 (s, 3H), 2.22 (s, 3H) ppm;  $^{13}\text{C NMR}$  (125 MHz,  $\text{CDCl}_3$ )  $\delta$  144.4 (s), 143.5 (s), 143.4 (s), 140.8 (s), 137.0 (s), 133.2 (s), 132.1 (s), 129.8 (d), 129.2 (d, 2C), 128.9 (d, 2C), 128.6 (s), 128.0 (s), 127.3 (d), 127.2 (d), 126.2 (d), 125.4 (d), 123.0 (d), 38.0 (q), 21.6 (q), 17.5 (q) ppm; IR (reflection)  $\tilde{\nu} = 3390, 3103, 1699, 1596, 1497, 1447, 1427, 1399, 1345, 1306, 1239, 1186, 1167, 1157, 1119, 1088, 1044, 1018, 931, 900, 865, 844, 834, 811, 789, 774, 763, 743, 730, 704, 676, 655, 642, 626, 615$   $\text{cm}^{-1}$ ; HRMS (DART) ( $m/z$ )  $[\text{M}+\text{H}]^+$   $\text{C}_{22}\text{H}_{21}\text{N}_2\text{O}_3\text{S}_2$  calcd for 425.0988, found 425.0093.

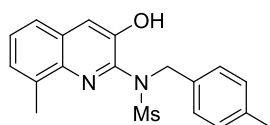

***N*-(3-hydroxy-8-methylquinolin-2-yl)-*N*-(4-methylbenzyl)methanesulfonamide (6j)**

Yield: 63 mg, 89% (according to procedure 3); 35 mg, 50% (according to procedure 2); light yellow solid, mp 276-278 °C;  $R_f = 0.27$  (EA/PE = 1/5);  $^1\text{H NMR}$  (500 MHz,  $\text{CDCl}_3$ )  $\delta$  7.46 (s, 1H), 7.44 (d,  $J = 8.0$  Hz, 1H), 7.35-7.32 (m, 1H), 7.30 (t,  $J = 7.5$  Hz, 1H), 7.04 (d,  $J = 8.0$  Hz, 2H), 6.91 (d,  $J = 8.0$  Hz, 2H), 6.39 (s, 1H), 4.95 (s, 2H), 3.08 (s, 3H), 2.68 (s, 3H), 2.15 (s, 3H) ppm;  $^{13}\text{C NMR}$  (125 MHz,  $\text{CDCl}_3$ )  $\delta$  147.2 (s), 142.1 (s), 141.3 (s), 137.9 (s), 136.5 (s), 132.0 (s), 129.0 (s), 129.4 (d, 2C), 128.7 (d, 2C), 127.7 (d), 127.5 (d), 124.6 (d), 121.0 (d), 54.5 (t), 36.4 (q), 21.1 (q), 17.9 (q) ppm; IR (reflection)  $\tilde{\nu} = 3440, 3031, 2923, 1735, 1620, 1500, 1472, 1452, 1418, 1371, 1355, 1339, 1319, 1247, 1154, 1060, 1040, 1026, 956, 902, 869, 861, 838, 812, 782, 766, 743, 722, 708, 648, 638, 606$   $\text{cm}^{-1}$ ; HRMS (DART) ( $m/z$ )  $[\text{M}+\text{H}]^+$   $\text{C}_{19}\text{H}_{21}\text{N}_2\text{O}_3\text{S}$  calcd for 357.1267, found 357.1273.

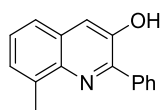

**8-methyl-2-phenylquinolin-3-ol (6k)**

Yield: 24 mg, 51%; light yellow oil;  $R_f = 0.53$  (EA/PE = 1/5);  $^1\text{H NMR}$  (300 MHz,  $\text{CDCl}_3$ )  $\delta$  7.87 (d,  $J = 7.2$  Hz, 2H), 7.49 (s, 1H), 7.50-7.36 (m, 4H), 7.35-7.25 (m, 2H), 5.62 (brs, 1H), 2.73 (s, 3H) ppm;  $^{13}\text{C NMR}$  (75 MHz,  $\text{CDCl}_3$ )  $\delta$  148.4 (s), 147.5 (d), 142.1 (s), 136.8 (s), 136.7 (s), 129.4 (d), 129.3 (d, 2C), 129.0 (s), 128.9 (d, 2C), 127.5 (d), 127.0 (d), 124.2 (d), 119.0 (d), 18.0 (q) ppm; IR (reflection)  $\tilde{\nu} = 3053, 2967, 2928, 2867, 2757, 2223, 1690, 1600, 1491, 1464, 1441, 1411, 1396, 1351, 1325, 1276, 1174, 1155, 1140, 1106, 1072, 1034, 1010, 955, 905, 875, 841, 781, 760, 720, 694, 676, 623$   $\text{cm}^{-1}$ ; HRMS (DART) ( $m/z$ )  $[\text{M}+\text{H}]^+$   $\text{C}_{16}\text{H}_{14}\text{NO}$  calcd for 236.1070, found 236.1070.

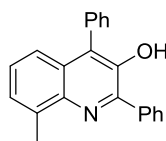

### 8-methyl-2,4-diphenylquinolin-3-ol (6l)

Yield: 37 mg, 60%; colorless oil;  $R_f = 0.41$  (EA/PE = 1/10);  $^1\text{H NMR}$  (300 MHz,  $\text{CDCl}_3$ )  $\delta$  8.15-8.05 (m, 2H), 7.59-7.51 (m, 2H), 7.51-7.32 (m, 7H), 7.25-7.19 (m, 1H), 7.17-7.12 (m, 1H), 5.26 (s, 1H), 2.81 (s, 3H) ppm;  $^{13}\text{C NMR}$  (75 MHz,  $\text{CDCl}_3$ )  $\delta$  147.8 (s), 143.9 (s), 142.5 (s), 138.1 (s), 137.7 (s), 132.7 (s), 130.5 (d, 2C), 129.8 (d, 2C), 129.7 (d, 2C), 129.6 (s), 129.1 (d), 128.9 (d), 128.3 (d, 2C), 127.6 (s), 127.0 (d), 126.7 (d), 122.6 (d), 18.2 (q) ppm; IR (reflection)  $\tilde{\nu} = 3516, 3058, 3028, 2955, 2920, 2870, 1589, 1559, 1485, 1463, 1443, 1409, 1382, 1321, 1288, 1258, 1224, 1171, 1133, 1074, 1029, 1015, 922, 856, 814, 766, 754, 725, 697, 636, 613\text{ cm}^{-1}$ ; HRMS (EI) ( $m/z$ )  $\text{C}_{22}\text{H}_{17}\text{NO}$  calcd for 311.1310, found 311.1312.

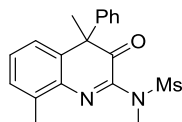

### *N*-(4,8-dimethyl-3-oxo-4-phenyl-3,4-dihydroquinolin-2-yl)-*N*-methylmethanesulfonamide (7a)

Yield: 59 mg, 83%; yellow solid, mp 163-166 °C;  $R_f = 0.17$  (EA/PE = 1/15);  $^1\text{H NMR}$  (500 MHz,  $\text{CDCl}_3$ )  $\delta$  7.25-7.20 (m, 3H), 7.14 (d,  $J = 7.5$  Hz, 1H), 7.04 (t,  $J = 7.5$  Hz, 1H), 7.01-6.98 (m, 2H), 6.75 (d,  $J = 7.5$  Hz, 1H), 3.23 (s, 3H), 3.20 (s, 3H), 2.43 (s, 3H), 1.82 (s, 3H) ppm;  $^{13}\text{C NMR}$  (125 MHz,  $\text{CDCl}_3$ )  $\delta$  195.3 (s), 150.0 (s), 139.1 (s), 138.3 (s), 138.0 (s), 137.2 (s), 130.0 (d), 128.5 (d, 2C), 128.4 (d, 2C), 128.02 (d), 127.95 (d), 125.5 (d), 57.5 (s), 40.9 (q), 34.6 (q), 23.1 (q), 17.9 (q) ppm; IR (reflection)  $\tilde{\nu} = 2990, 2945, 1721, 1600, 1572, 1490, 1474, 1446, 1414, 1352, 1328, 1283, 1259, 1241, 1182, 1150, 1091, 1029, 1001, 956, 917, 891, 829, 813, 788, 766, 758, 735, 723, 700, 641\text{ cm}^{-1}$ ; HRMS (DART) ( $m/z$ )  $[\text{M}+\text{H}]^+$   $\text{C}_{19}\text{H}_{21}\text{N}_2\text{O}_3\text{S}$  calcd for 357.1267, found 357.1274.

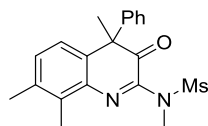

### *N*-methyl-*N*-(4,7,8-trimethyl-3-oxo-4-phenyl-3,4-dihydroquinolin-2-yl)methanesulfonamide (7b)

Yield: 54 mg, 73%; yellow oil;  $R_f = 0.17$  (EA/PE = 1/15);  $^1\text{H NMR}$  (500 MHz,  $\text{CDCl}_3$ )  $\delta$  7.25-7.20 (m, 3H), 7.02-6.98 (m, 2H), 6.95 (d,  $J = 8.0$  Hz, 1H), 6.65 (d,  $J = 8.0$  Hz, 1H), 3.23 (s, 3H), 3.19 (s, 3H), 2.38 (s, 3H), 2.25 (s, 3H), 1.81 (s, 3H) ppm;  $^{13}\text{C NMR}$  (125 MHz,  $\text{CDCl}_3$ )  $\delta$  195.5 (s), 149.9 (s), 139.3 (s), 137.7 (s), 137.3 (s), 135.9 (s), 135.8 (s), 129.5 (d), 128.43 (d, 2C), 128.40 (d, 2C), 127.9 (d), 124.6 (d), 57.3 (s), 40.8 (q), 34.6 (q), 23.2 (q), 20.3 (q), 13.8 (q) ppm; IR (reflection)  $\tilde{\nu} = 2981, 2935, 2871, 2254, 1715, 1593, 1566, 1480, 1446, 1352, 1283, 1197, 1153, 1084, 1068, 960, 912, 852, 818, 784, 765, 734, 705, 685, 635\text{ cm}^{-1}$ ; HRMS (DART) ( $m/z$ )  $[\text{M}+\text{H}]^+$   $\text{C}_{20}\text{H}_{23}\text{N}_2\text{O}_3\text{S}$  calcd for 371.1424, found 371.1430.

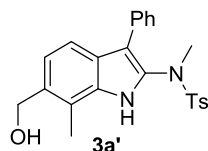

### *N*-(6-(hydroxymethyl)-7-methyl-3-phenyl-1*H*-indol-2-yl)-*N*,4-dimethylbenzenesulfonamide (3a')

Yield: 82 mg, 98%; white solid, mp 207-209 °C;  $R_f = 0.29$  (EA/PE = 1/2);  $^1\text{H NMR}$  (300 MHz,  $\text{DMSO}-d_6$ )  $\delta$  11.12 (brs, 1H), 7.42 (d,  $J = 8.1$  Hz, 2H), 7.33-7.16 (m, 8H), 7.09 (d,  $J = 8.1$  Hz, 1H),

4.97 (brs, 1H), 4.61 (s, 2H), 3.26 (s, 3H), 2.46 (s, 3H), 2.37 (s, 3H) ppm;  $^{13}\text{C}$  NMR (75 MHz, DMSO- $d_6$ )  $\delta$  143.4 (s), 135.2 (s), 133.9 (s), 133.63 (s), 133.56 (s), 130.4 (s), 129.4 (d, 2C), 128.6 (d, 2C), 128.2 (d, 2C), 127.3 (d, 2C), 125.8 (d), 124.5 (s), 120.7 (d), 118.7 (s), 115.8 (d), 112.6 (s), 61.5 (t), 38.4 (q), 21.0 (q), 12.5 (q) ppm; IR (reflection)  $\tilde{\nu}$  = 3368, 2872, 1737, 1600, 1564, 1495, 1440, 1346, 1241, 1151, 1087, 1004, 988, 912, 861, 812, 777, 758, 730, 710, 695, 666, 608  $\text{cm}^{-1}$ ; HRMS (DART) ( $m/z$ )  $[\text{M}+\text{H}]^+$   $\text{C}_{24}\text{H}_{25}\text{N}_2\text{O}_3\text{S}$  calcd for 421.1580, found 421.1580.

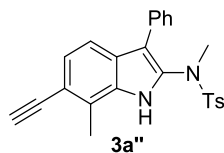

***N*-(6-ethynyl-7-methyl-3-phenyl-1*H*-indol-2-yl)-*N*,4-dimethylbenzenesulfonamide (3a'')**

Yield: 73 mg, 87%; white solid, mp 196-198  $^{\circ}\text{C}$ ;  $R_f$  = 0.43 (EA/PE = 1/4);  $^1\text{H}$  NMR (300 MHz,  $\text{CDCl}_3$ )  $\delta$  8.58 (brs, 1H), 7.49 (d,  $J$  = 8.1 Hz, 2H), 7.24-7.15 (m, 4H), 7.14-7.09 (m, 1H), 7.09-6.99 (m, 2H), 6.53 (d,  $J$  = 6.9 Hz, 2H), 3.21 (s, 1H), 2.96 (s, 3H), 2.57 (s, 3H), 2.38 (s, 3H) ppm;  $^{13}\text{C}$  NMR (75 MHz,  $\text{CDCl}_3$ )  $\delta$  144.4 (s), 134.1 (s), 132.8 (s), 132.2 (s), 131.7 (s), 129.9 (d, 2C), 129.3 (d, 2C), 128.2 (d, 2C), 127.6 (d, 2C), 126.9 (d), 126.6 (s), 124.8 (d), 123.6 (s), 116.9 (d), 115.8 (s), 112.2 (s), 83.4 (s), 80.0 (d), 38.4 (q), 21.6 (q), 14.7 (q) ppm; IR (reflection)  $\tilde{\nu}$  = 3367, 3307, 3280, 3268, 3028, 2097, 1739, 1600, 1581, 1564, 1495, 1439, 1346, 1306, 1234, 1151, 1087, 1075, 1029, 986, 911, 861, 823, 812, 784, 758, 722, 709, 697, 683, 660, 627  $\text{cm}^{-1}$ ; HRMS (ESI) ( $m/z$ )  $[\text{M}+\text{H}]^+$   $\text{C}_{25}\text{H}_{23}\text{N}_2\text{O}_2\text{S}$  calcd for 415.1475, found 415.1477.

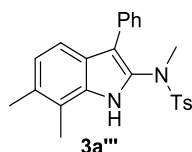

***N*-(6,7-dimethyl-3-phenyl-1*H*-indol-2-yl)-*N*,4-dimethylbenzenesulfonamide (3a''')**

Yield: 60 mg, 74%; white solid, mp 229-230  $^{\circ}\text{C}$ ;  $R_f$  = 0.33 (EA/PE = 1/10);  $^1\text{H}$  NMR (400 MHz,  $\text{CDCl}_3$ )  $\delta$  8.37 (brs, 1H), 7.48 (d,  $J$  = 8.4 Hz, 2H), 7.18-7.14 (m, 3H), 7.12-7.07 (m, 1H), 7.07-7.01 (m, 2H), 6.86 (d,  $J$  = 8.0 Hz, 1H), 6.63-6.57 (m, 2H), 2.99 (s, 3H), 2.35 (s, 3H), 2.34 (s, 3H), 2.33 (s, 3H) ppm;  $^{13}\text{C}$  NMR (100 MHz,  $\text{CDCl}_3$ )  $\delta$  144.2 (s), 134.4 (s), 133.4 (s), 133.3 (s), 130.7 (s), 129.79 (s), 129.75 (d, 2C), 129.2 (d, 2C), 128.1 (d, 2C), 127.6 (d, 2C), 126.5 (d), 124.6 (s), 123.1 (d), 118.0 (s), 116.6 (d), 112.2 (s), 38.5 (q), 21.6 (q), 19.4 (q), 13.1 (q) ppm; IR (reflection)  $\tilde{\nu}$  = 3360, 3089, 3055, 2970, 2914, 2858, 1893, 1621, 1600, 1564, 1494, 1439, 1344, 1305, 1264, 1239, 1185, 1168, 1151, 1102, 1087, 1074, 1031, 1003, 990, 910, 864, 838, 810, 790, 771, 757, 726, 707, 693, 661, 609  $\text{cm}^{-1}$ ; HRMS (DRAT) ( $m/z$ )  $[\text{M}+\text{H}]^+$   $\text{C}_{24}\text{H}_{25}\text{N}_2\text{O}_2\text{S}$  calcd for 405.1631, found 405.1628.

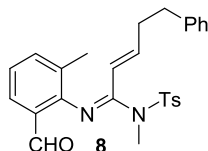

***N'*-(2-formyl-6-methylphenyl)-*N*-methyl-5-phenyl-*N*-tosylpent-2-enimidamide (8)**

Yield: 36 mg, 39% (PicAuCl<sub>2</sub> as catalyst); 43 mg, 47% (JohnPhosAuCl/AgSbF<sub>6</sub> as catalyst), light yellow oil;  $R_f$  = 0.26 (EA/PE = 1/5);  $^1\text{H}$  NMR (300 MHz,  $\text{CDCl}_3$ )  $\delta$  9.61 (s, 1H), 7.71 (d,  $J$  = 8.1 Hz, 2H), 7.55 (d,  $J$  = 7.5 Hz, 1H), 7.29-7.21 (m, 3H), 7.18-7.12 (m, 2H), 7.12-7.06 (m, 1H), 7.02-6.92 (m, 3H), 6.28-6.12 (m, 1H), 5.64 (d,  $J$  = 15.9 Hz, 1H), 3.13 (s, 3H), 2.50 (t,  $J$  = 7.5 Hz, 2H), 2.37 (s, 3H), 2.33-2.23 (m, 2H), 1.85 (s, 3H) ppm;  $^{13}\text{C}$  NMR (75 MHz,  $\text{CDCl}_3$ )  $\delta$  190.9 (d), 156.2 (s),

149.6 (s), 145.8 (d), 144.3 (s), 140.5 (s), 136.3 (d), 135.1 (s), 129.6 (d, 2C), 128.4 (d, 2C), 128.2 (d, 2C), 128.1 (d, 2C; s, 1C), 126.9 (d), 126.1 (d), 125.2 (s), 123.3 (d), 121.4 (d), 36.4 (q), 34.20 (t), 34.18 (t), 21.6 (q), 17.6 (q) ppm; IR (reflection)  $\tilde{\nu}$  = 3064, 3027, 2925, 2858, 1692, 1677, 1649, 1591, 1496, 1455, 1353, 1290, 1240, 1162, 1088, 1040, 969, 920, 815, 780, 752, 700, 671, 627, 606  $\text{cm}^{-1}$ ; HRMS (DART) ( $m/z$ )  $[\text{M}+\text{H}]^+$   $\text{C}_{27}\text{H}_{29}\text{N}_2\text{O}_3\text{S}$  calcd for 461.1893, found 461.1895.

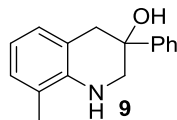

### 8-methyl-3-phenyl-1,2,3,4-tetrahydroquinolin-3-ol (9)

Yield: 30 mg, 63%; white solid, mp 118-119 °C;  $R_f$  = 0.43 (EA/PE = 1/4);  $^1\text{H}$  NMR (300 MHz,  $\text{CDCl}_3$ )  $\delta$  7.53-7.43 (m, 2H), 7.33 (t,  $J$  = 7.5 Hz, 2H) 7.26-7.18 (m, 1H), 6.90 (d,  $J$  = 7.5 Hz, 1H), 6.86 (d,  $J$  = 7.5 Hz, 1H), 6.61 (t,  $J$  = 7.5 Hz, 1H), 3.87 (brs, 1H), 3.41 (d,  $J$  = 11.4 Hz, 1H), 3.32 (d,  $J$  = 16.8 Hz, 1H), 3.19 (dd,  $J$  = 11.4, 2.7 Hz, 1H), 3.00 (brs, 1H), 2.83 (dd,  $J$  = 16.8, 1.8 Hz, 1H), 2.11 (s, 3H) ppm;  $^{13}\text{C}$  NMR (75 MHz,  $\text{CDCl}_3$ )  $\delta$  144.8 (s), 140.7 (s), 128.6 (d), 128.4 (d, 2C), 128.3 (d), 127.2 (d), 125.0 (d, 2C), 121.7 (s), 119.5 (s), 118.1 (d), 68.7 (s), 52.7 (t), 41.6 (t), 17.2 (q) ppm; IR (reflection)  $\tilde{\nu}$  = 3346, 3057, 3010, 2931, 2899, 2829, 1906, 1597, 1479, 1456, 1424, 1382, 1355, 1273, 1233, 1201, 1130, 1098, 1068, 1054, 1028, 976, 947, 930, 905, 882, 859, 803, 767, 756, 734, 721, 700, 633  $\text{cm}^{-1}$ ; HRMS (DART) ( $m/z$ )  $[\text{M}+\text{H}]^+$   $\text{C}_{16}\text{H}_{18}\text{NO}$  calcd for 240.1383, found 240.1383.

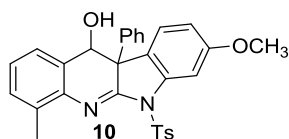

### 8-methoxy-4-methyl-10b-phenyl-6-tosyl-10b,11-dihydro-6H-indolo[2,3-b]quinolin-11-ol (10)

Yield: 80 mg, 79%; white solid, mp 203-205 °C;  $R_f$  = 0.26 (EA/PE = 1/2);  $^1\text{H}$  NMR (500 MHz,  $\text{CDCl}_3$ )  $\delta$  8.06 (d,  $J$  = 8.5 Hz, 2H), 7.55 (d,  $J$  = 2.0 Hz, 1H), 7.32 (d,  $J$  = 8.0 Hz, 1H), 7.19 (d,  $J$  = 8.5 Hz, 2H), 7.09-7.07 (m, 2H), 7.04-6.98 (m, 4H), 6.85 (d,  $J$  = 6.0 Hz, 1H), 6.81 (t,  $J$  = 7.5 Hz, 1H), 6.60 (dd,  $J$  = 2.0, 8.0 Hz, 1H), 5.02 (s, 1H), 3.76 (s, 3H), 2.45 (s, 3H), 2.31 (s, 3H), 1.42 (brs, 1H) ppm;  $^{13}\text{C}$  NMR (125 MHz,  $\text{CDCl}_3$ )  $\delta$  162.4 (s), 160.6 (s), 145.0 (s), 142.7 (s), 140.8 (s), 137.4 (s), 135.7 (s), 134.5 (s), 131.8 (d), 129.4 (d, 2C), 128.9 (d, 2C), 128.5 (d, 2C), 127.6 (d), 126.5 (d), 126.0 (d), 125.6 (d, 2C), 124.7 (d), 124.4 (s), 121.8 (s), 109.8 (d), 101.4 (d), 72.5 (d), 55.69 (q), 55.68 (s), 21.7 (q), 17.8 (q) ppm; IR (reflection)  $\tilde{\nu}$  = 3447, 3000, 2838, 1656, 1614, 1593, 1492, 1464, 1441, 1400, 1374, 1344, 1305, 1286, 1258, 1215, 1170, 1118, 1092, 1053, 997, 978, 946, 931, 880, 850, 820, 810, 781, 765, 752, 730, 695, 666, 650, 626, 613  $\text{cm}^{-1}$ ; HRMS (DART) ( $m/z$ )  $[\text{M}+\text{H}]^+$   $\text{C}_{30}\text{H}_{27}\text{N}_2\text{O}_4\text{S}$  calcd for 511.1686, found 511.1693.

## 5. References

- (a) Phillips, B. T.; Hartman, G. D. *J. Heterocycl. Chem.* **1986**, *23*, 897. (b) Wratten, S. J.; Fujiwara, H.; Solsten, R. T. *J. Agr. Food Chem.* **1987**, *35*, 484.
- (a) Coste, A.; Karthikeyan, G.; Couty, F.; Evano, G. *Angew. Chem., Int. Ed.* **2009**, *48*, 4381. (b) Hamada, T.; Ye, X.; Stahl, S. S. *J. Am. Chem. Soc.* **2008**, *130*, 833. (c) Zhang, Y.; Hsung, R. P.; Tracey, M. R.; Kurtz, K. C. M.; Vera, E. L. *Org. Lett.* **2004**, *6*, 1151. (d)

- Nishihara, Y.; Ikegashira, K.; Hirabayashi, K.; Ando, J.-I.; Mori, A.; Hiyama, T. *J. Org. Chem.* **2000**, *65*, 1780.
3. (a) Jin, H.; Huang, L.; Xie, J.; Rudolph, M.; Rominger, F.; Hashmi, A. S. K. *Angew. Chem., Int. Ed.* **2016**, *55*, 794. (b) Jin, H.; Tian, B.; Song, X.; Xie, J.; Rudolph, M.; Rominger, F.; Hashmi, A. S. K. *Angew. Chem., Int. Ed.* **2016**, *55*, 12688.

## 6. NMR Spectra

$^1\text{H}$  NMR of compound **1a** in  $\text{CDCl}_3$

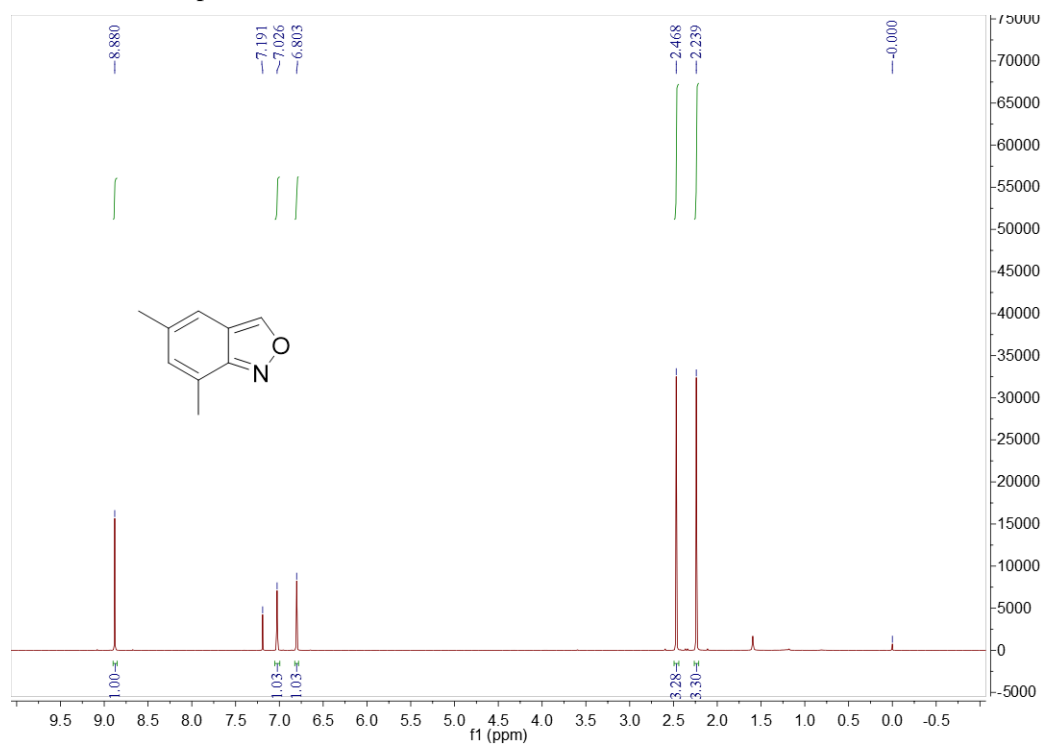

$^{13}\text{C}$  NMR of compound **1a** in  $\text{CDCl}_3$

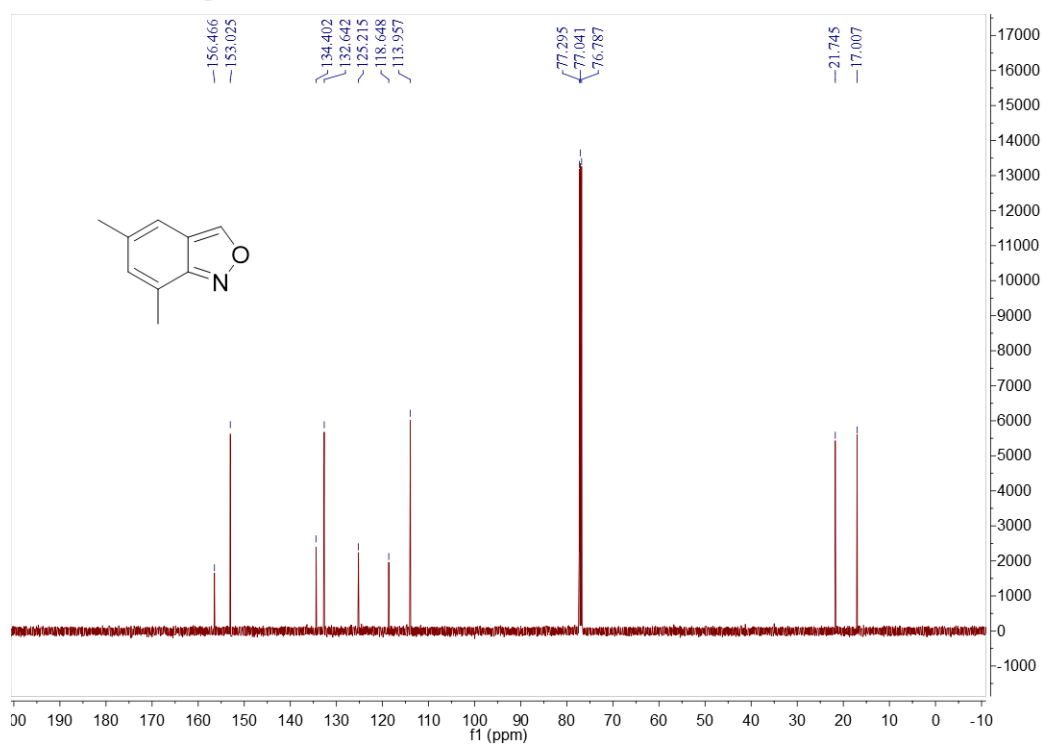



<sup>1</sup>H NMR of compound **1e** in CDCl<sub>3</sub>

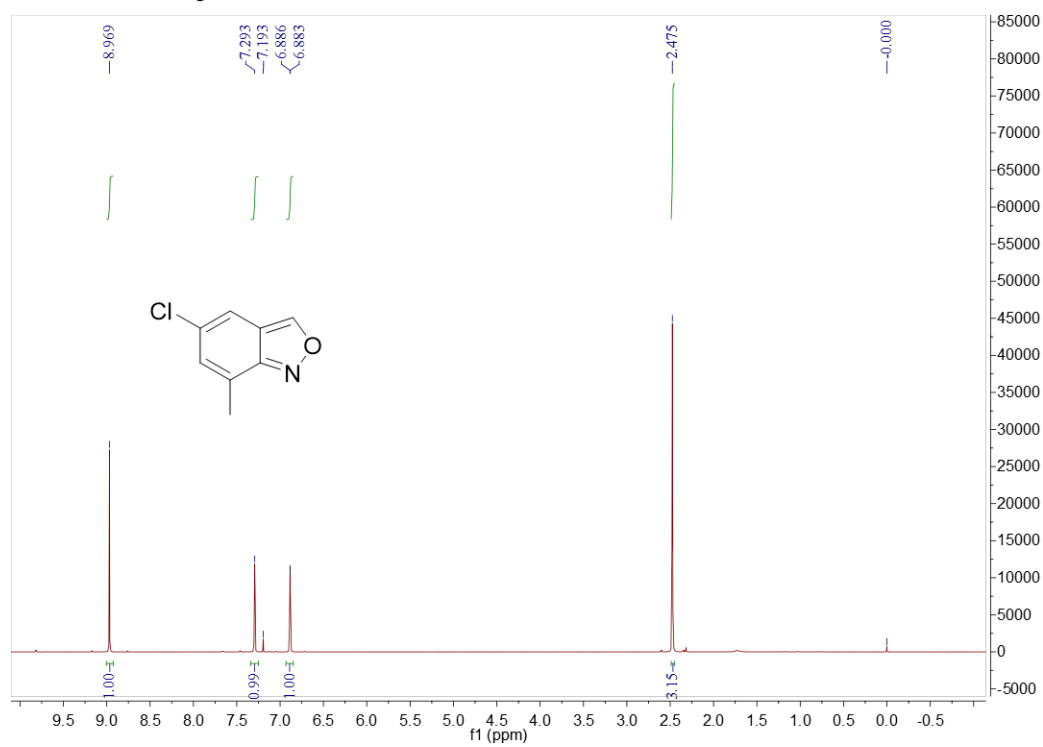

<sup>13</sup>C NMR of compound **1e** in CDCl<sub>3</sub>

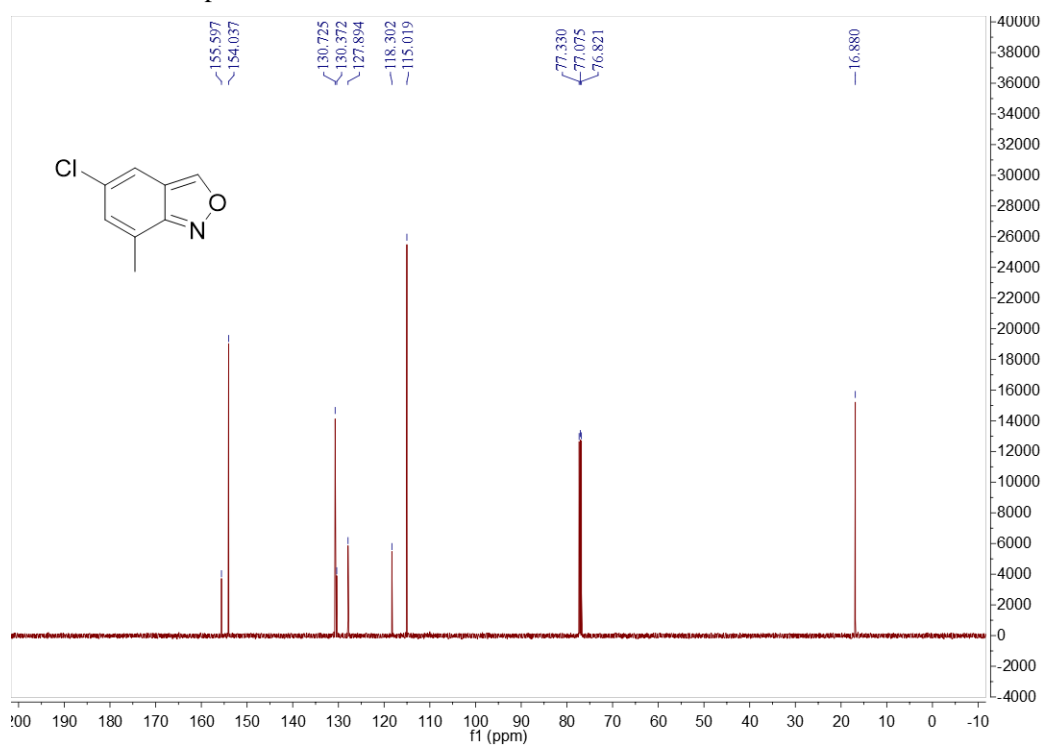

<sup>1</sup>H NMR of compound **1f** in CDCl<sub>3</sub>

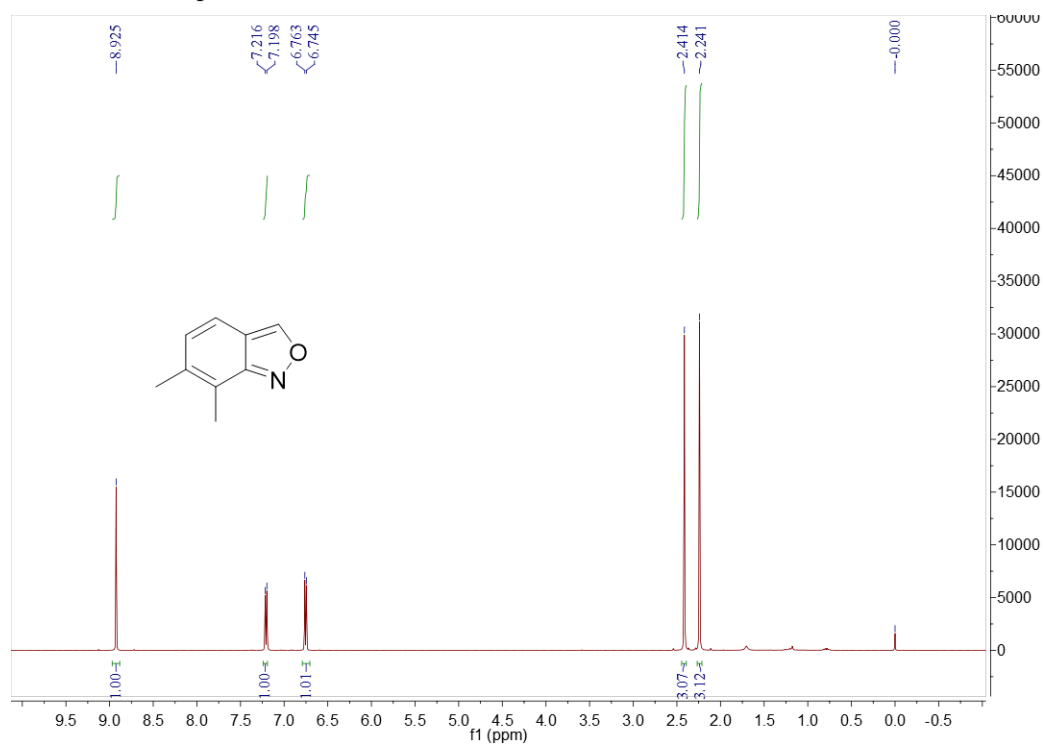

<sup>13</sup>C NMR of compound **1f** in CDCl<sub>3</sub>

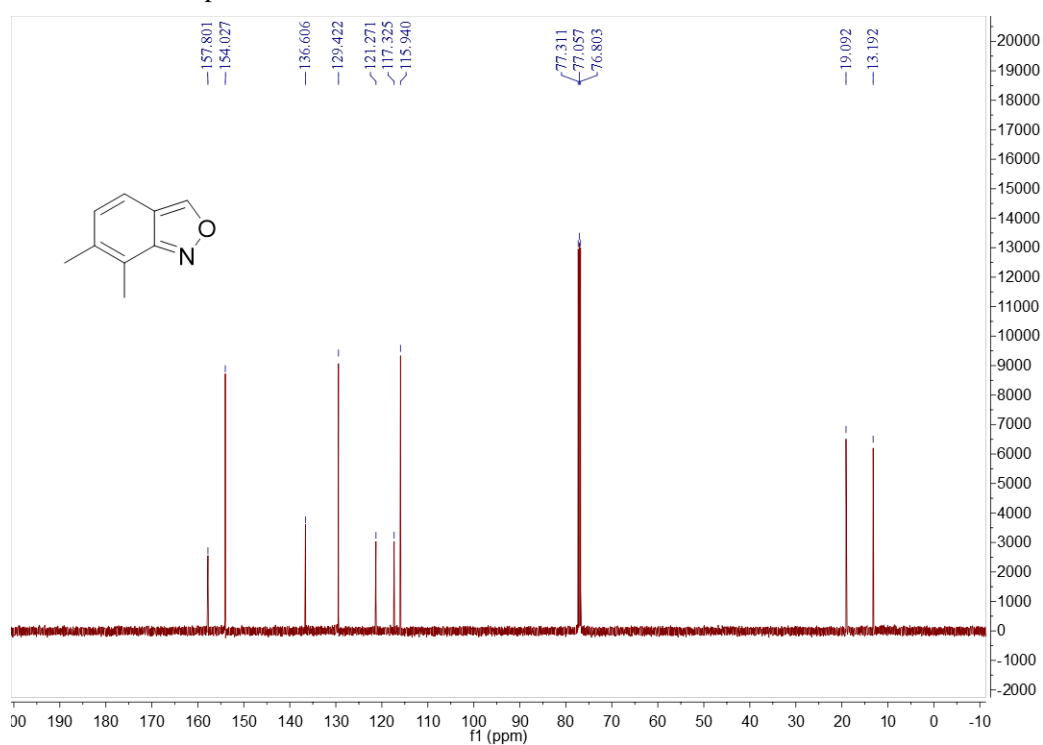

<sup>1</sup>H NMR of compound **1g** in CDCl<sub>3</sub>

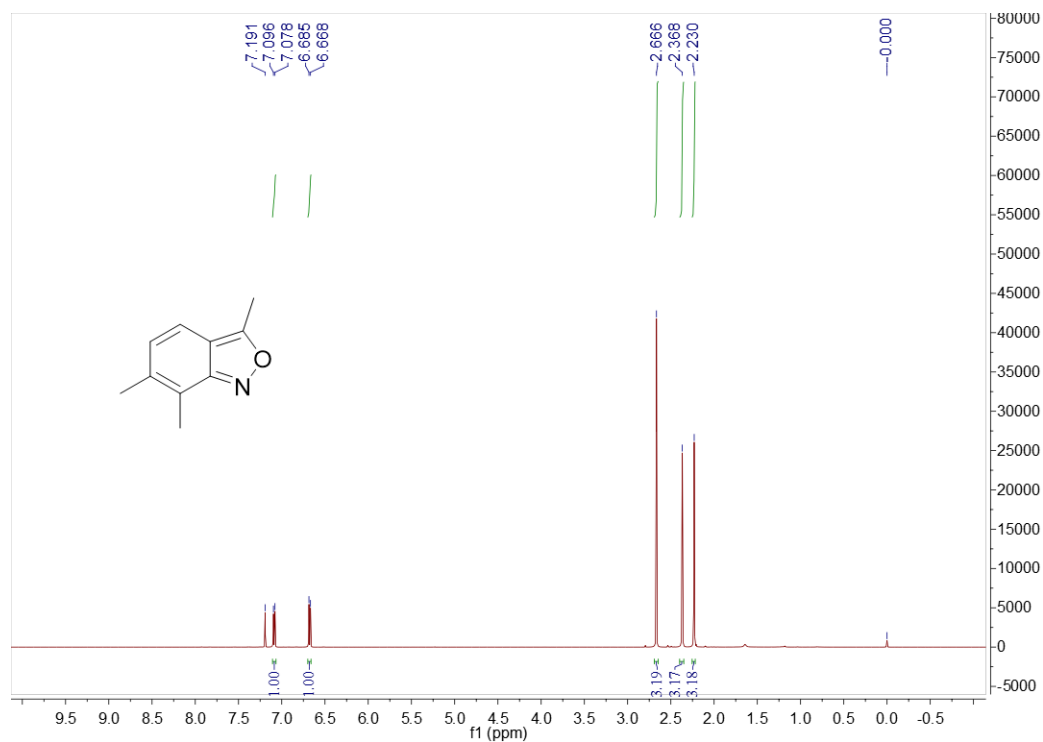

<sup>13</sup>C NMR of compound **1g** in CDCl<sub>3</sub>

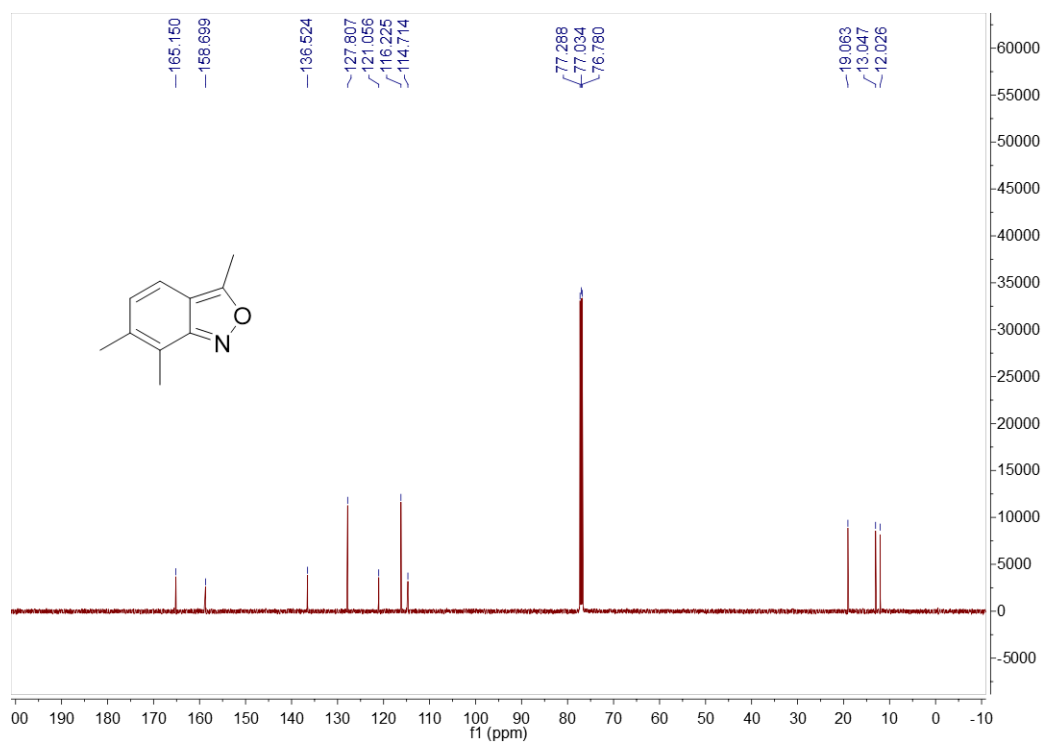

$^1\text{H}$  NMR of compound **1h** in  $\text{CDCl}_3$

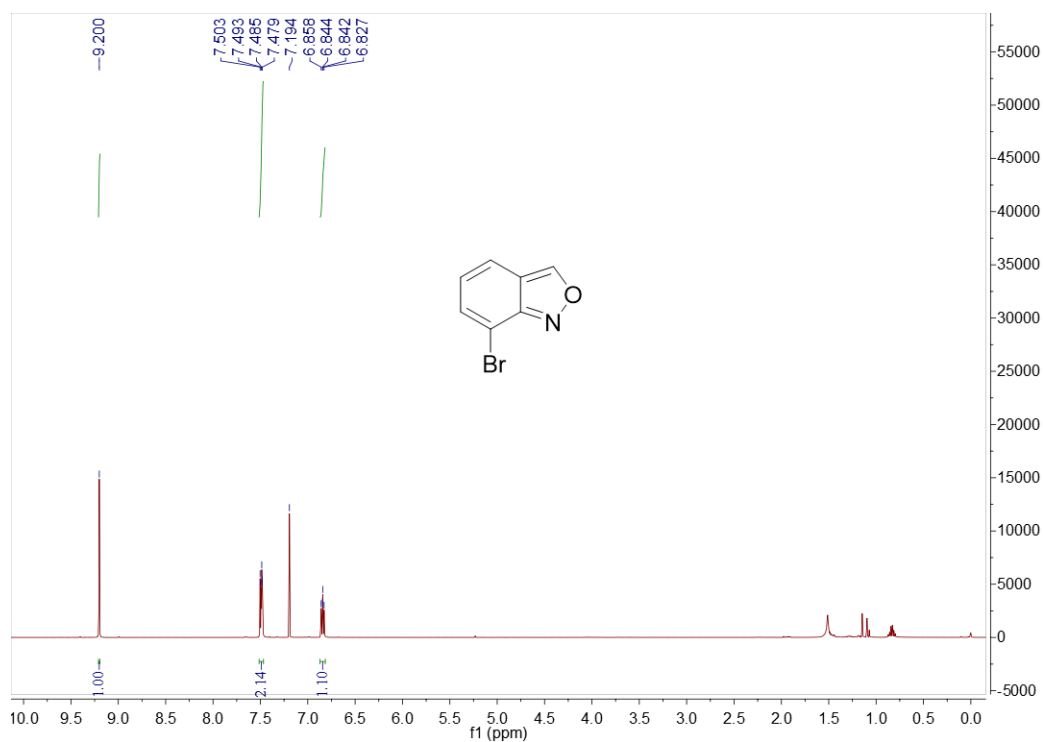

$^{13}\text{C}$  NMR of compound **1h** in  $\text{CDCl}_3$

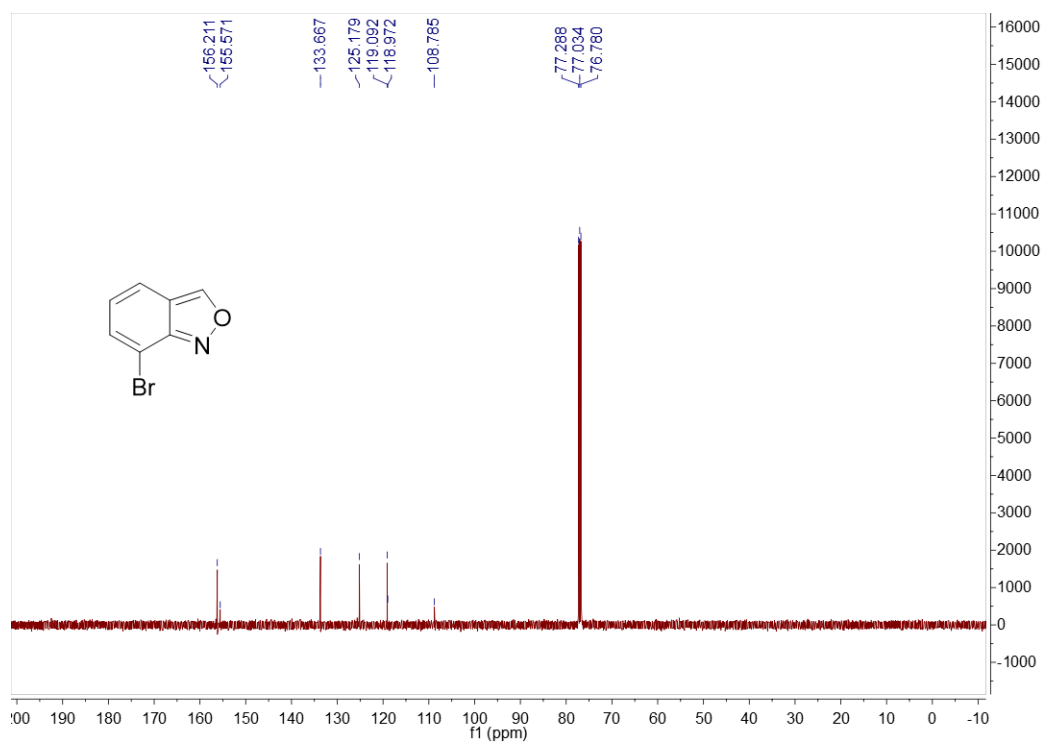

<sup>1</sup>H NMR of compound **1i** in CDCl<sub>3</sub>

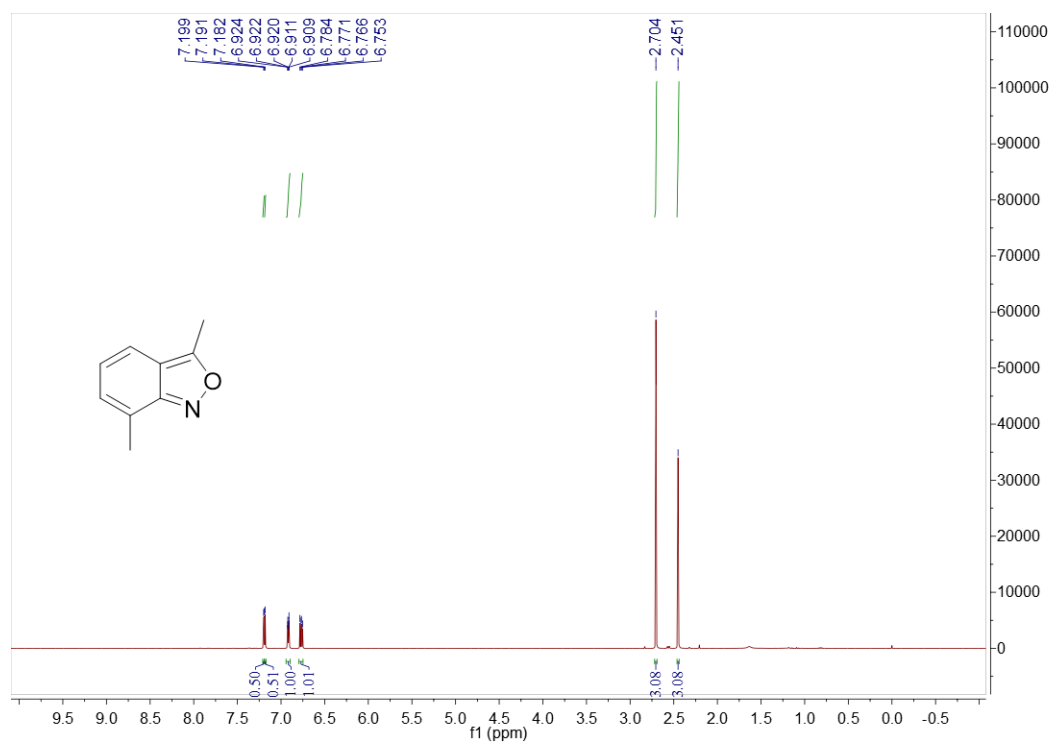

<sup>13</sup>C NMR of compound **1i** in CDCl<sub>3</sub>

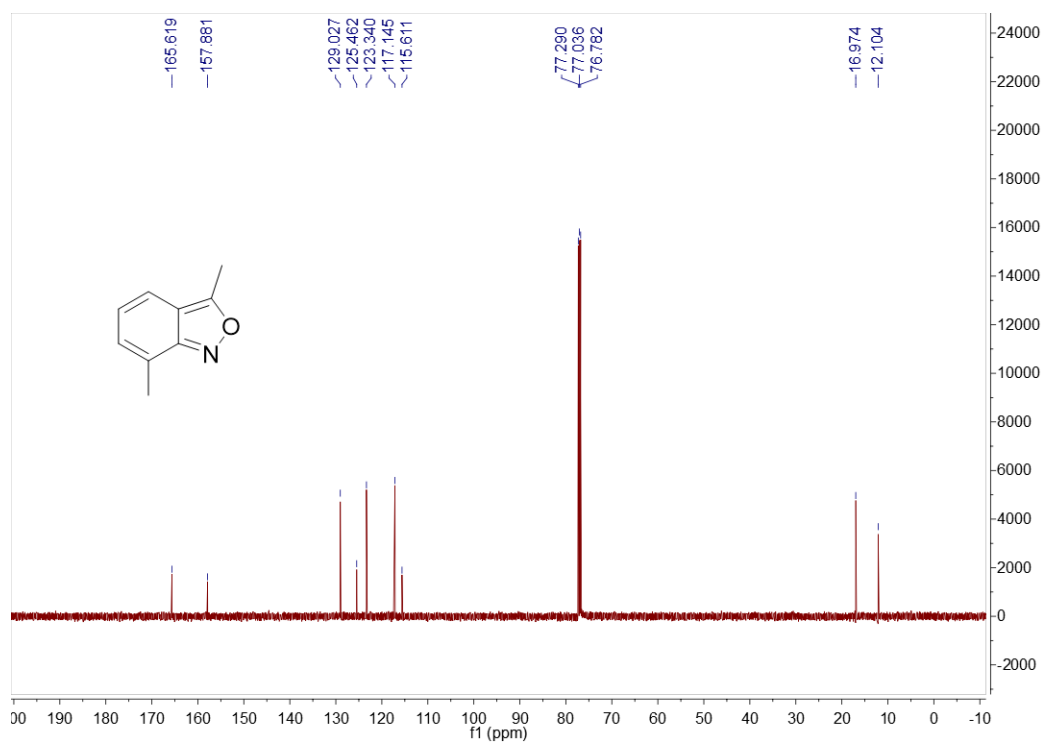

$^1\text{H}$  NMR of compound **1k** in  $\text{CDCl}_3$

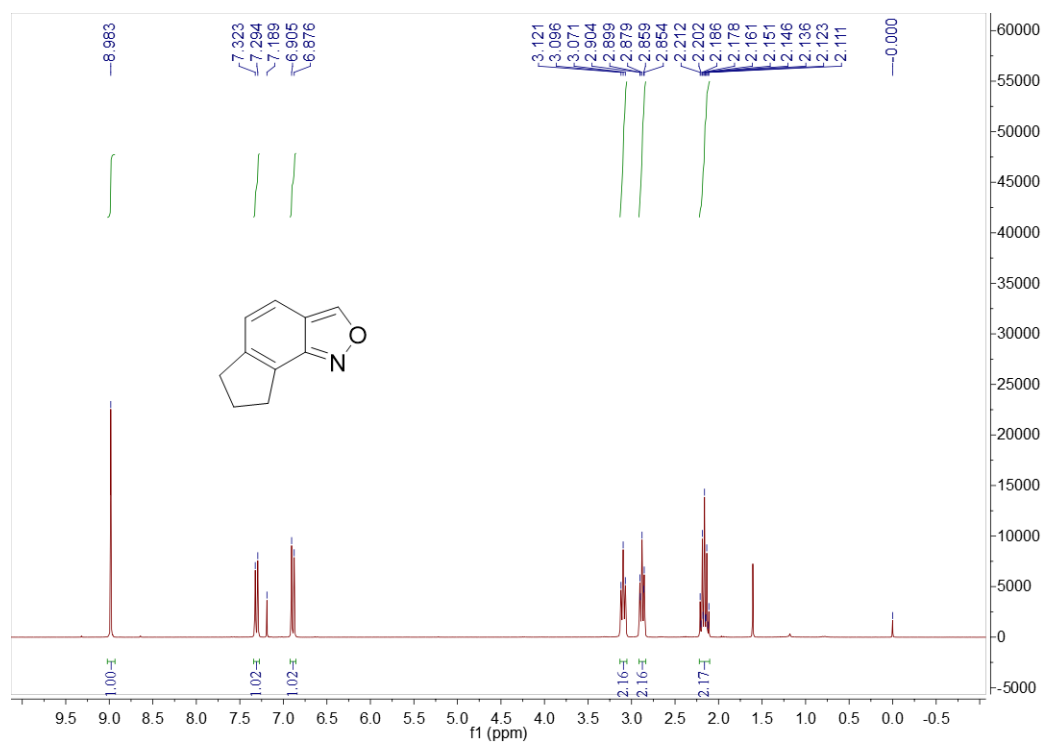

$^{13}\text{C}$  NMR of compound **1k** in  $\text{CDCl}_3$

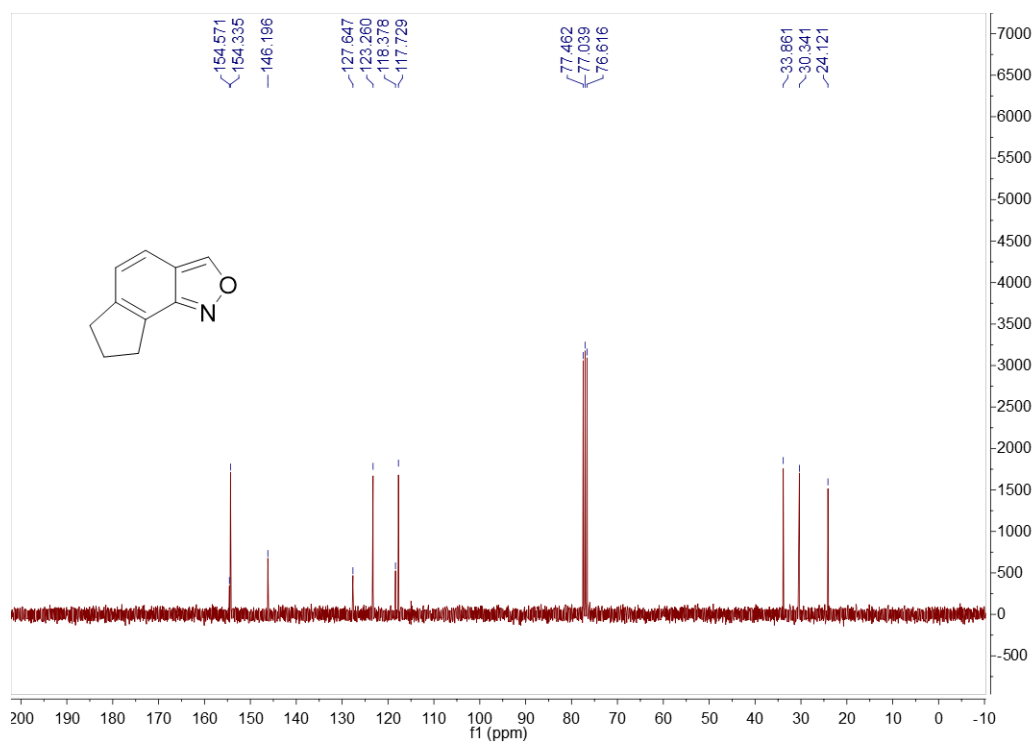

$^1\text{H}$  NMR of compound **3a** in  $\text{DMSO-}d_6$

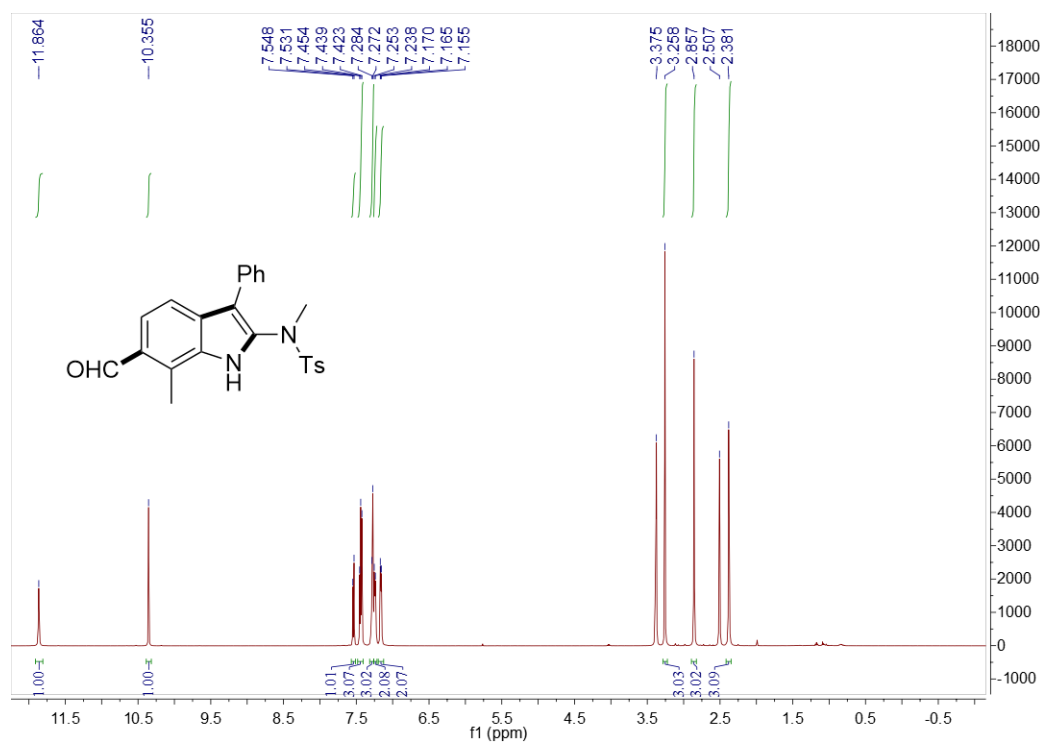

$^{13}\text{C}$  NMR of compound **3a** in  $\text{DMSO-}d_6$

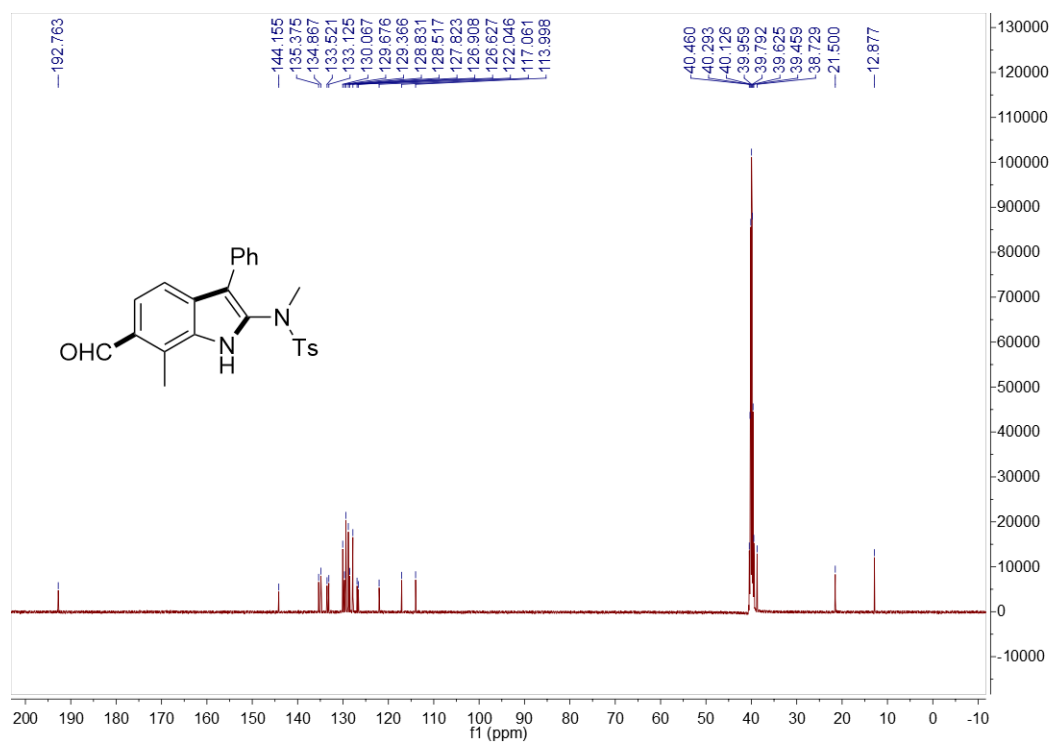

<sup>1</sup>H NMR of compound **3b** in Acetone-*d*<sub>6</sub>

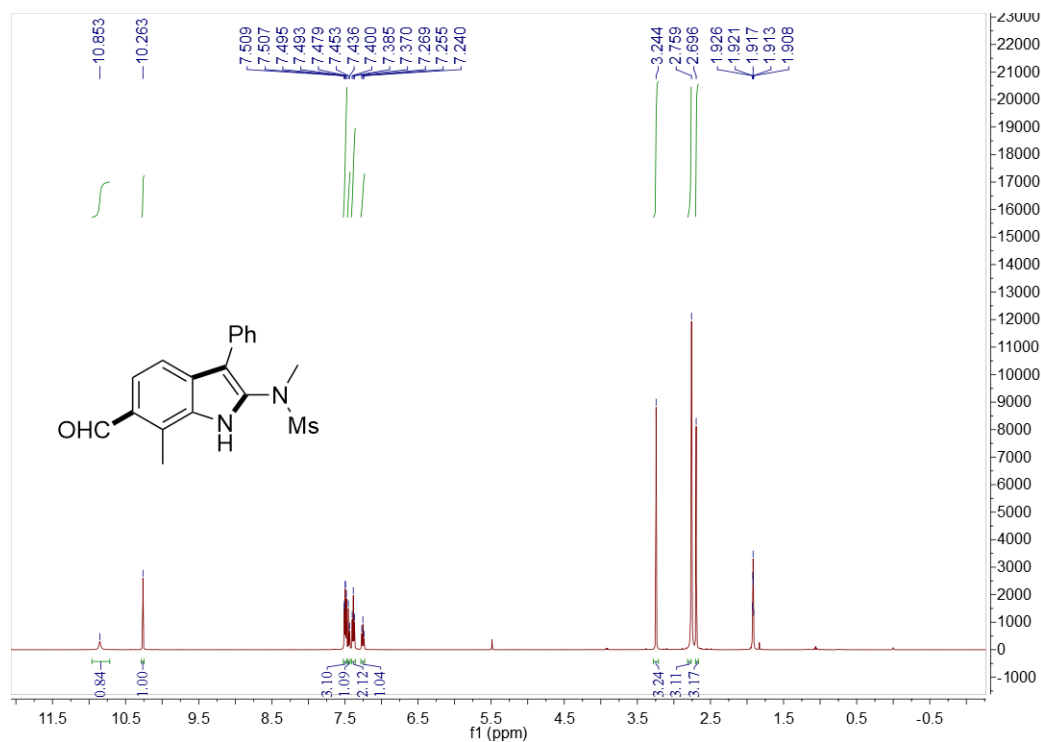

<sup>13</sup>C NMR of compound **3b** in Acetone-*d*<sub>6</sub>

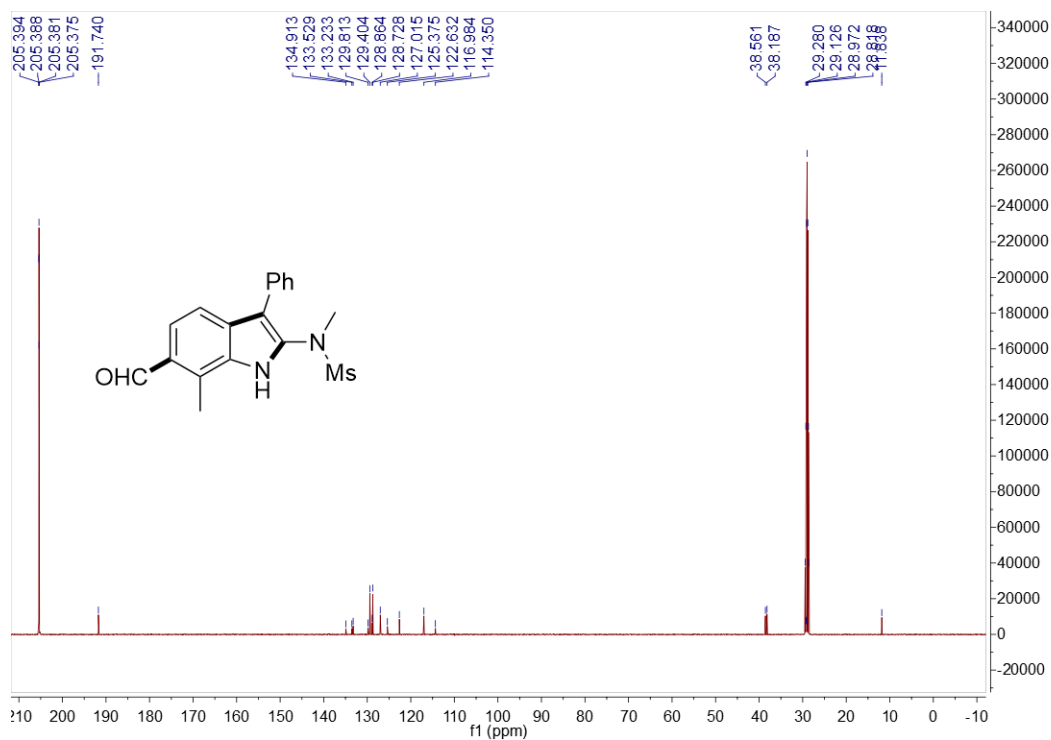



<sup>1</sup>H NMR of compound **3c** in DMSO-*d*<sub>6</sub>

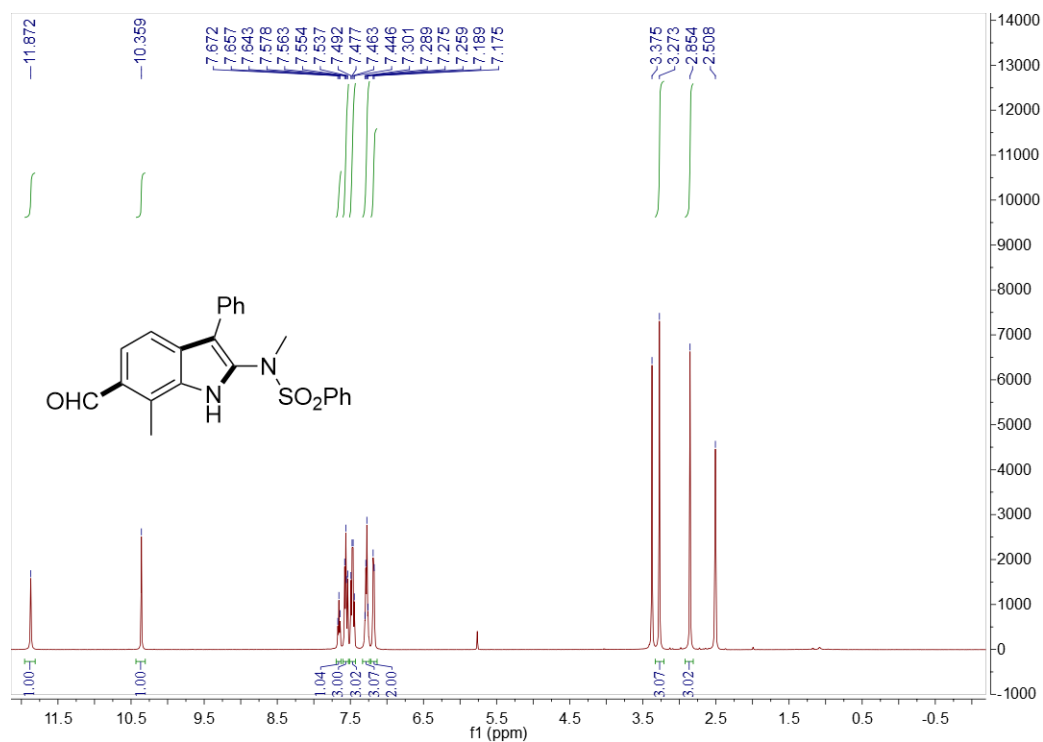

<sup>13</sup>C NMR of compound **3c** in DMSO-*d*<sub>6</sub>

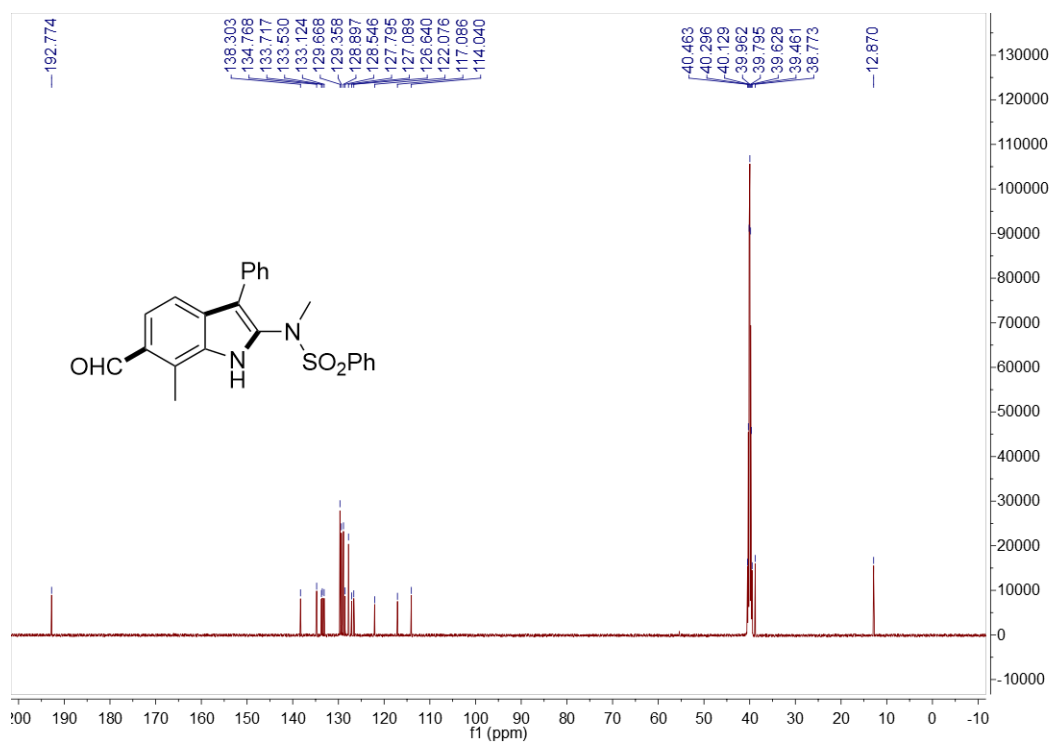

<sup>1</sup>H NMR of compound **3d** in DMSO-*d*<sub>6</sub>

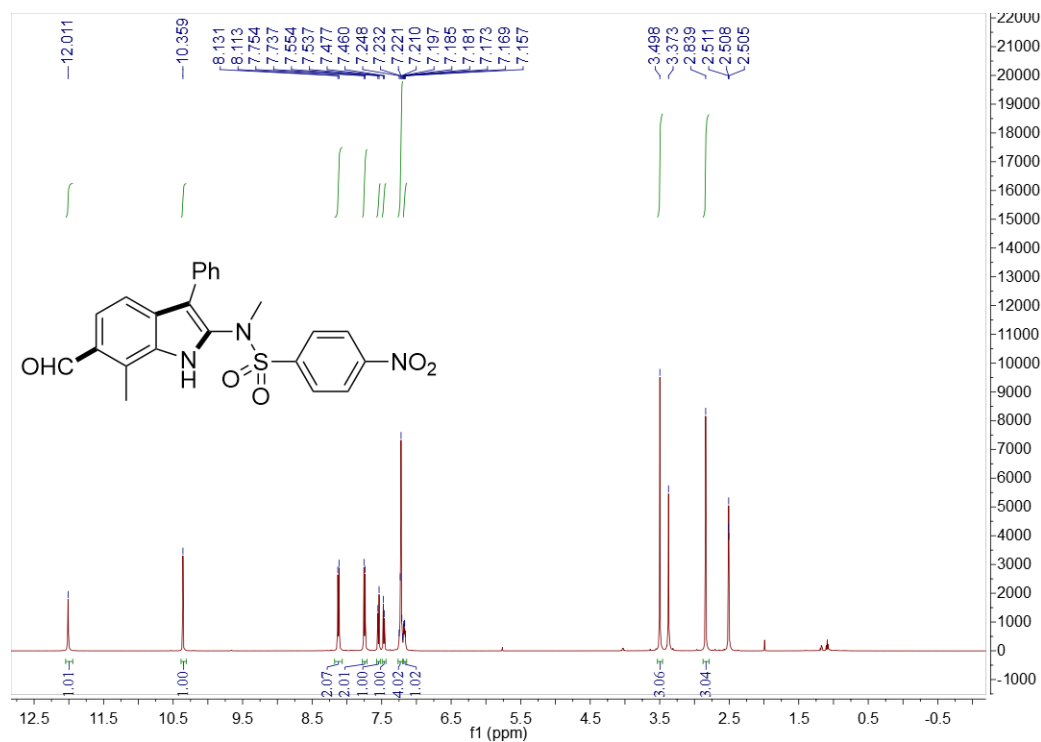

<sup>13</sup>C NMR of compound **3d** in DMSO-*d*<sub>6</sub>

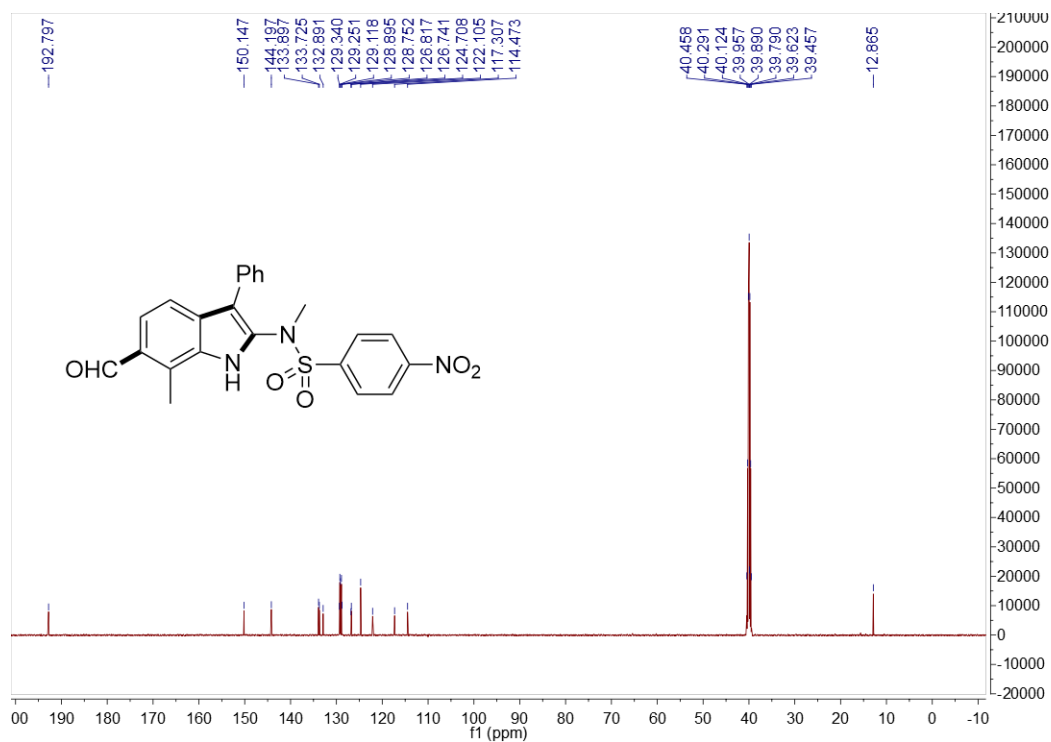

<sup>1</sup>H NMR of compound **3e** in CDCl<sub>3</sub>

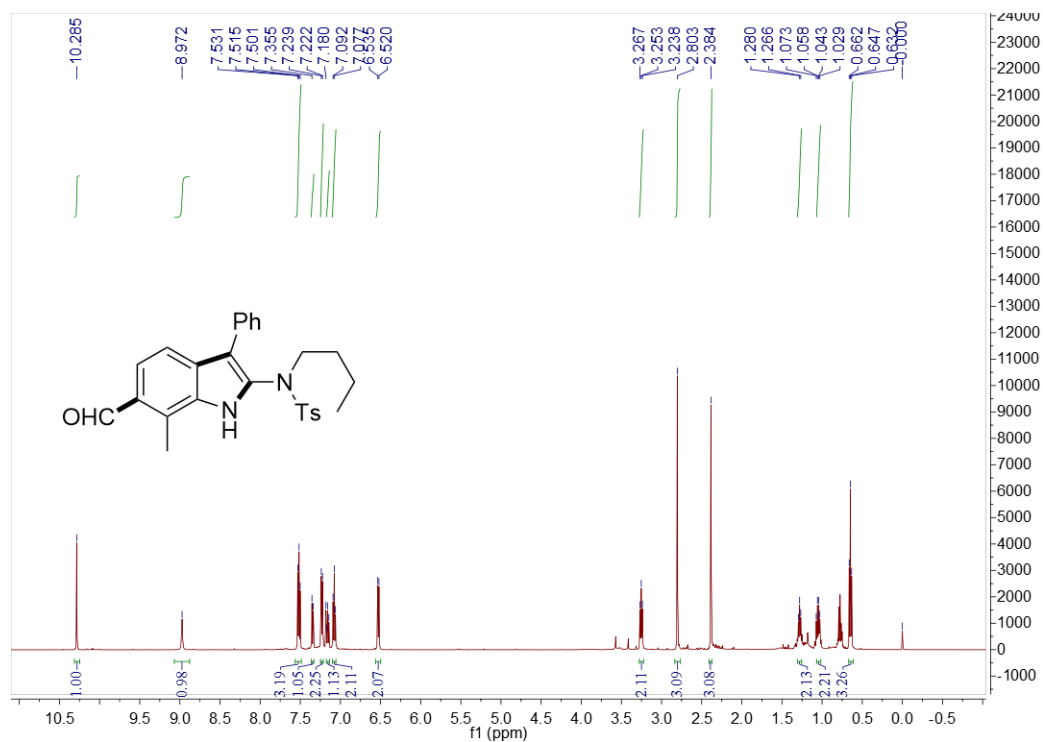

<sup>13</sup>C NMR of compound **3e** in CDCl<sub>3</sub>

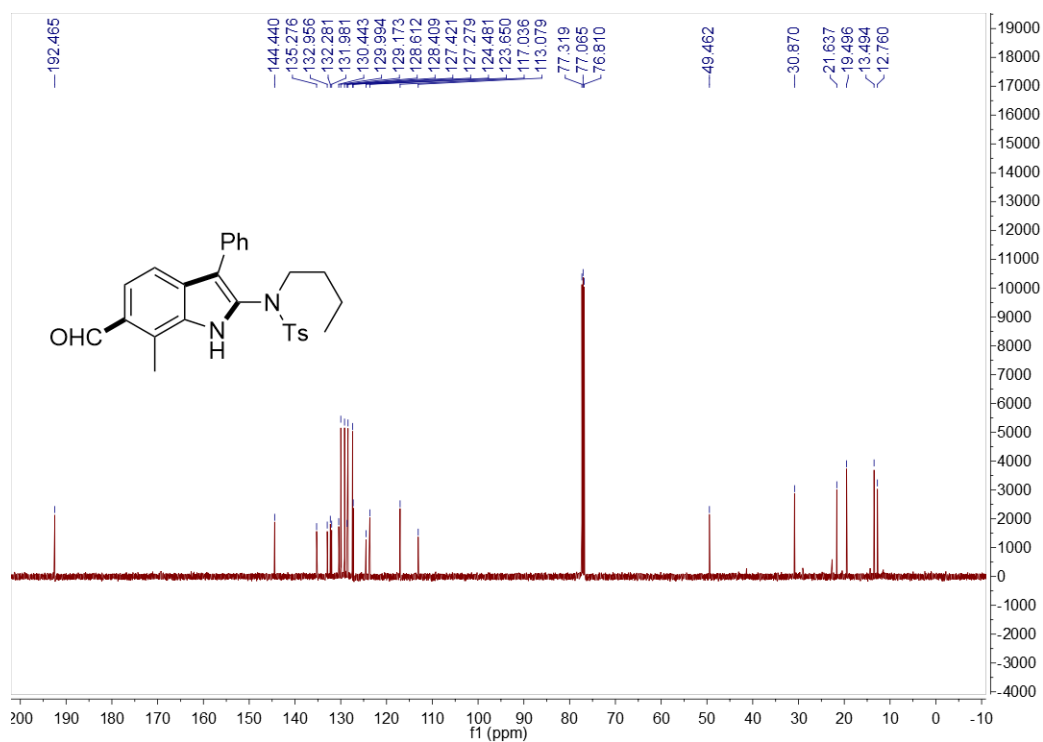

$^1\text{H}$  NMR of compound **3f** in  $\text{CDCl}_3$

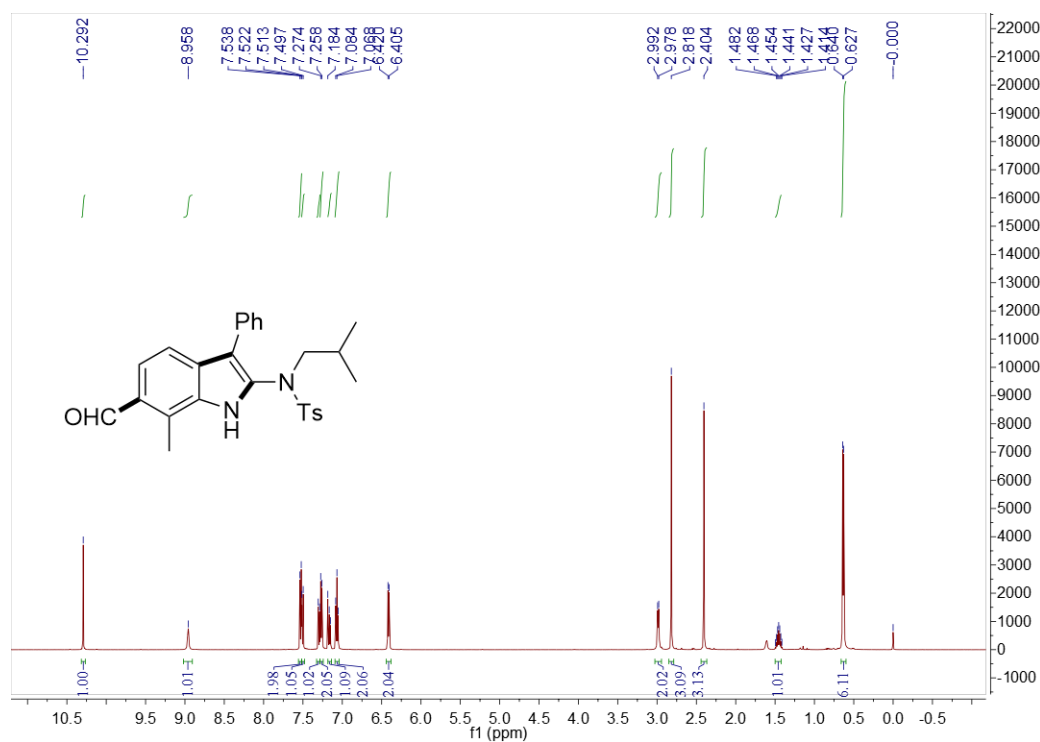

$^{13}\text{C}$  NMR of compound **3f** in  $\text{CDCl}_3$

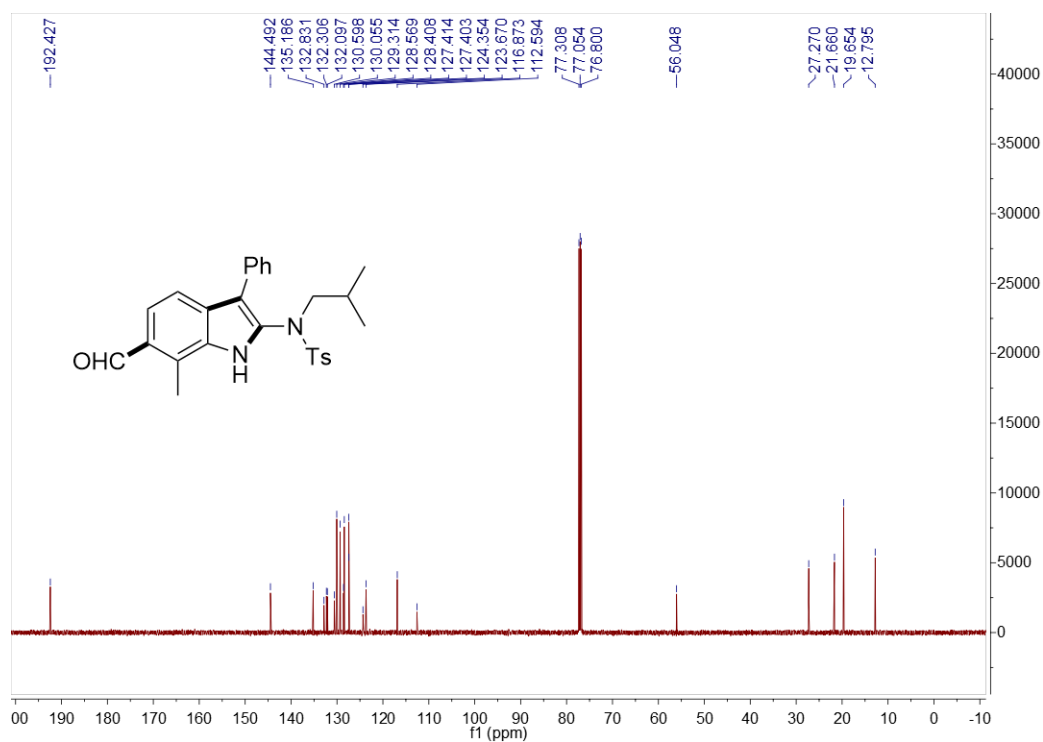

<sup>1</sup>H NMR of compound **3g** in DMSO-*d*<sub>6</sub>

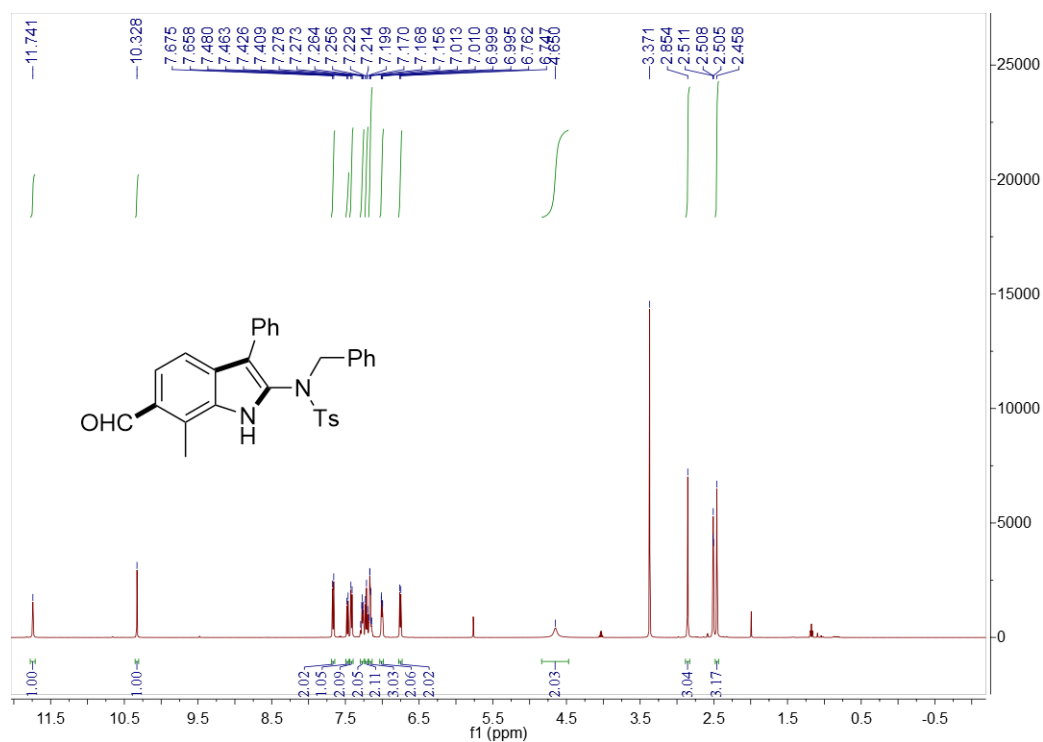

<sup>13</sup>C NMR of compound **3g** in DMSO-*d*<sub>6</sub>

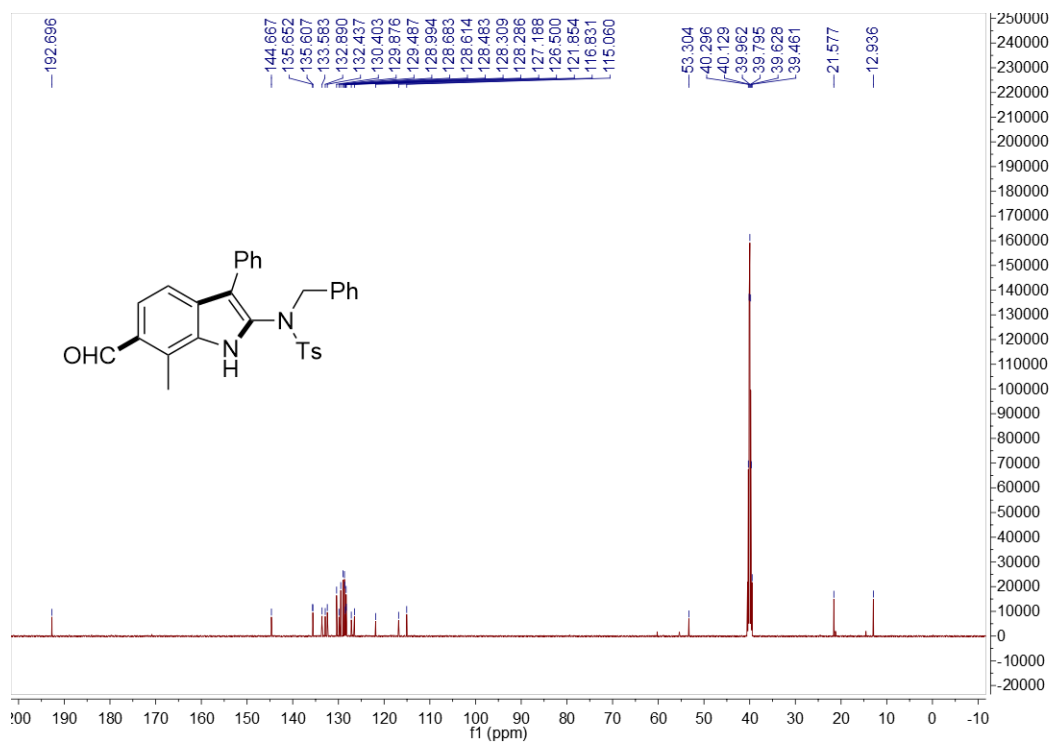

<sup>1</sup>H NMR of compound **3h** in DMSO-*d*<sub>6</sub>

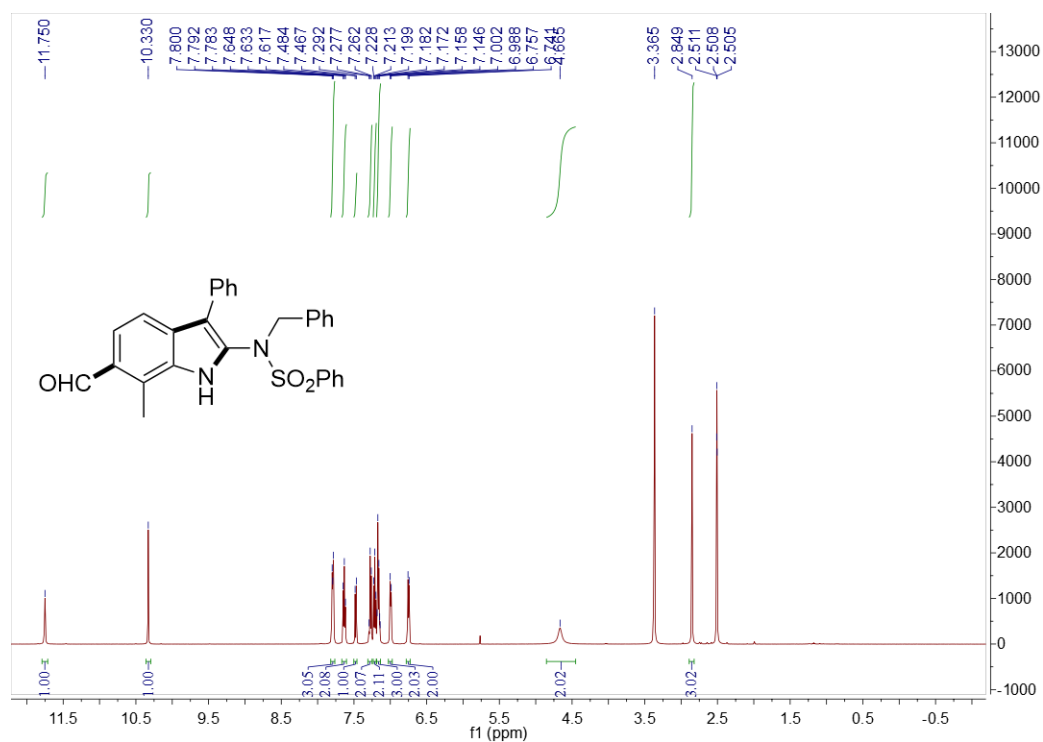

<sup>13</sup>C NMR of compound **3h** in DMSO-*d*<sub>6</sub>

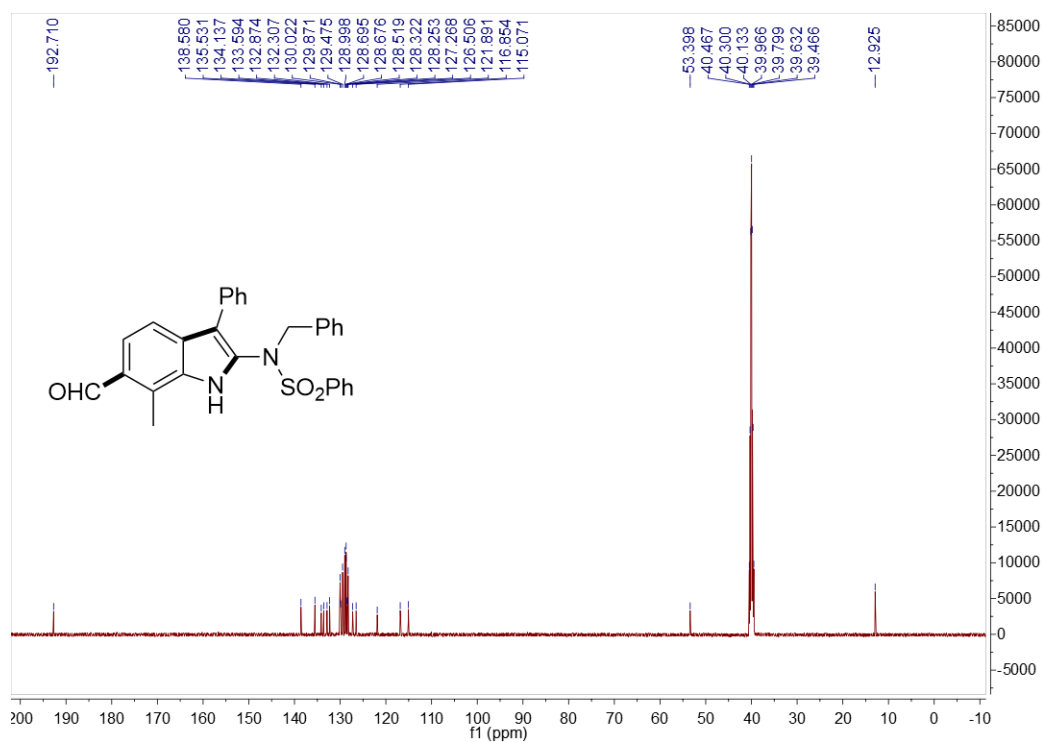

<sup>1</sup>H NMR of compound **3i** in DMSO-*d*<sub>6</sub>

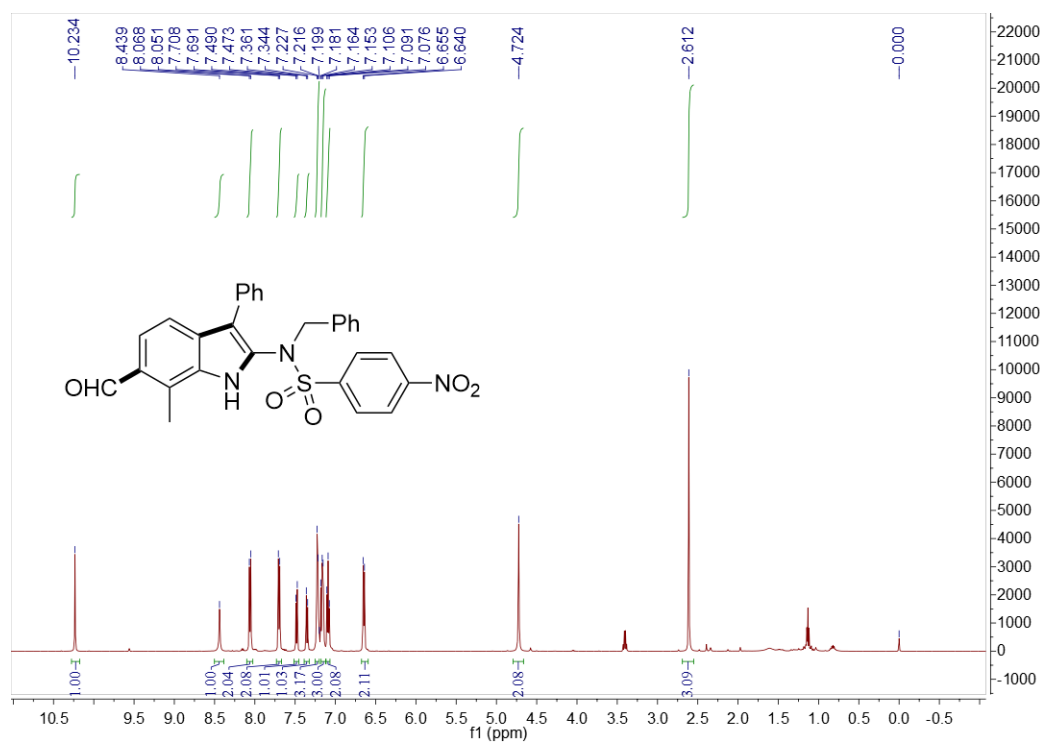

<sup>13</sup>C NMR of compound **3i** in DMSO-*d*<sub>6</sub>

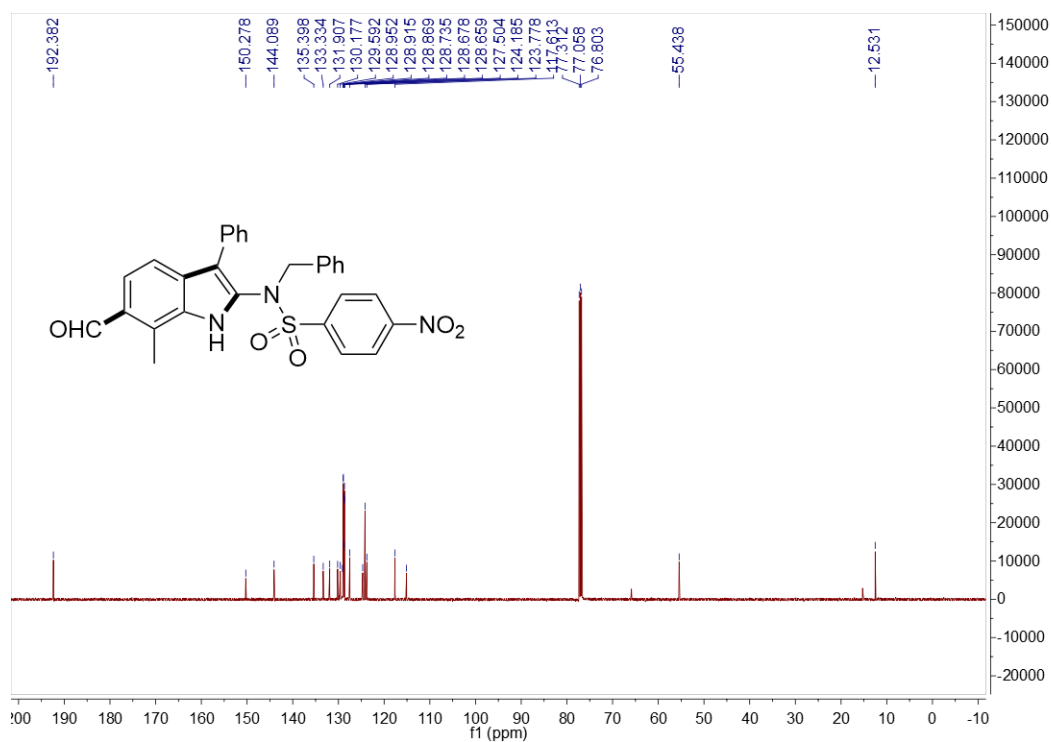

$^1\text{H}$  NMR of compound **3j** in  $\text{CDCl}_3$

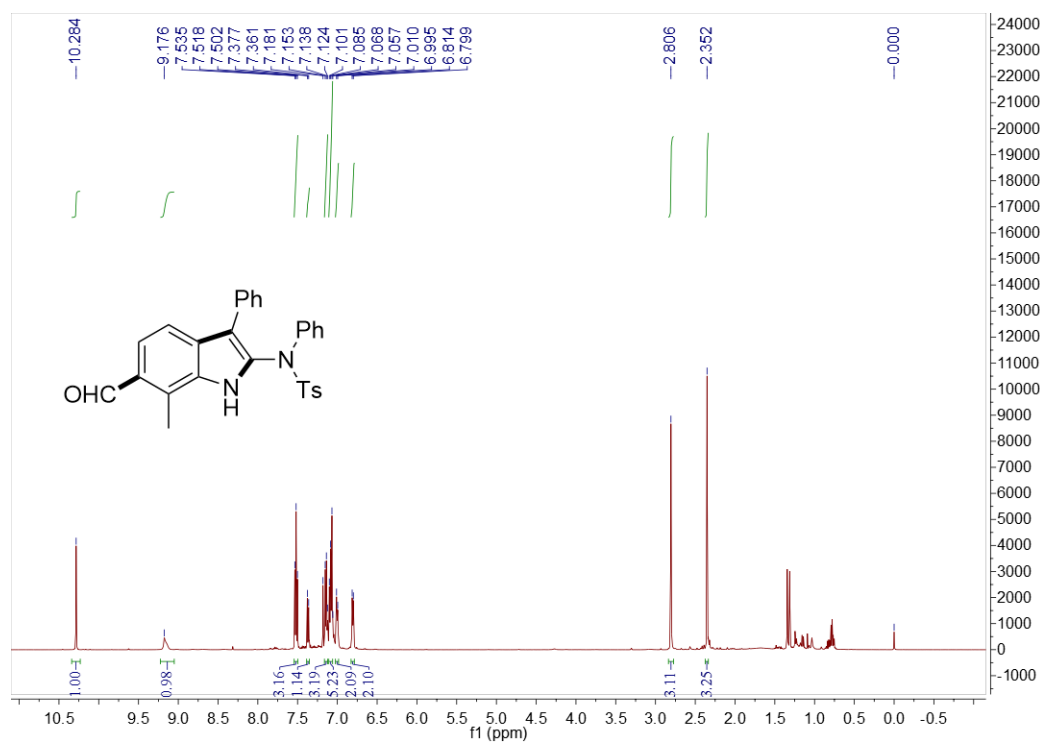

$^{13}\text{C}$  NMR of compound **3j** in  $\text{CDCl}_3$

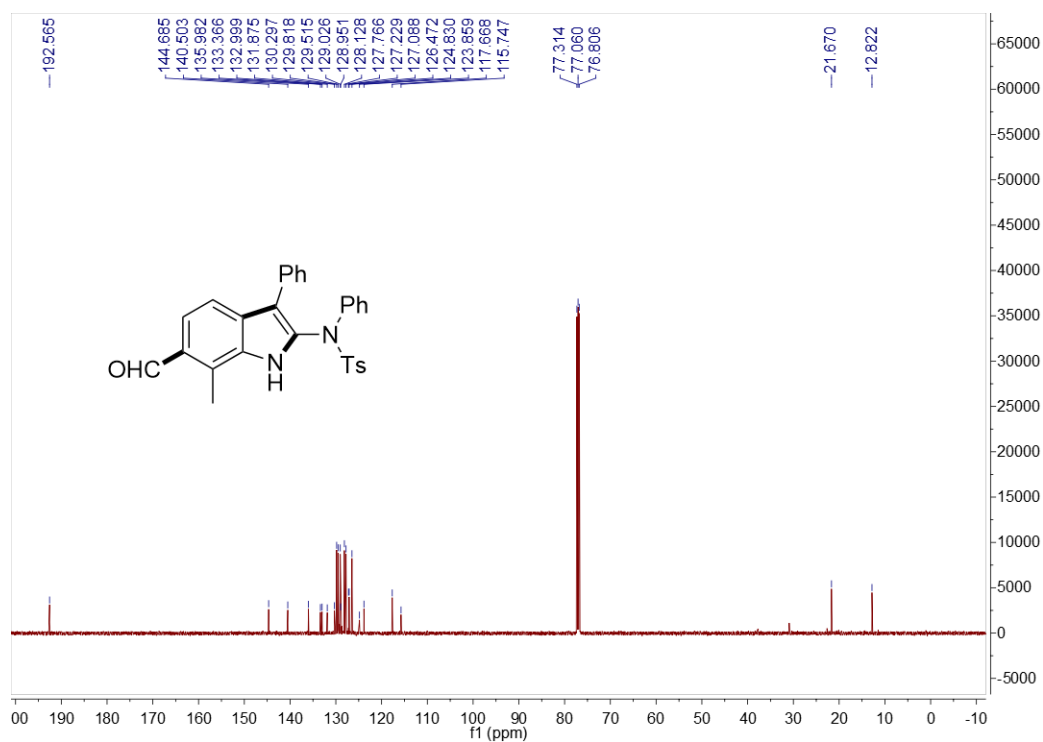



$^1\text{H}$  NMR of compound **3k** in  $\text{CDCl}_3$

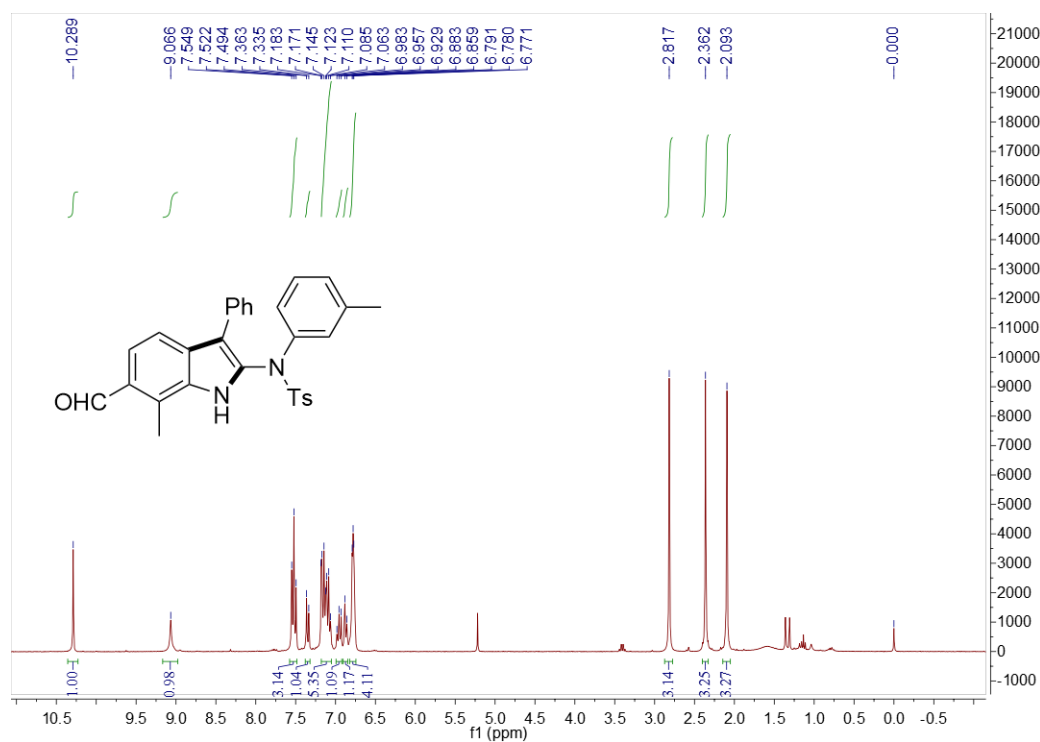

$^{13}\text{C}$  NMR of compound **3k** in  $\text{CDCl}_3$

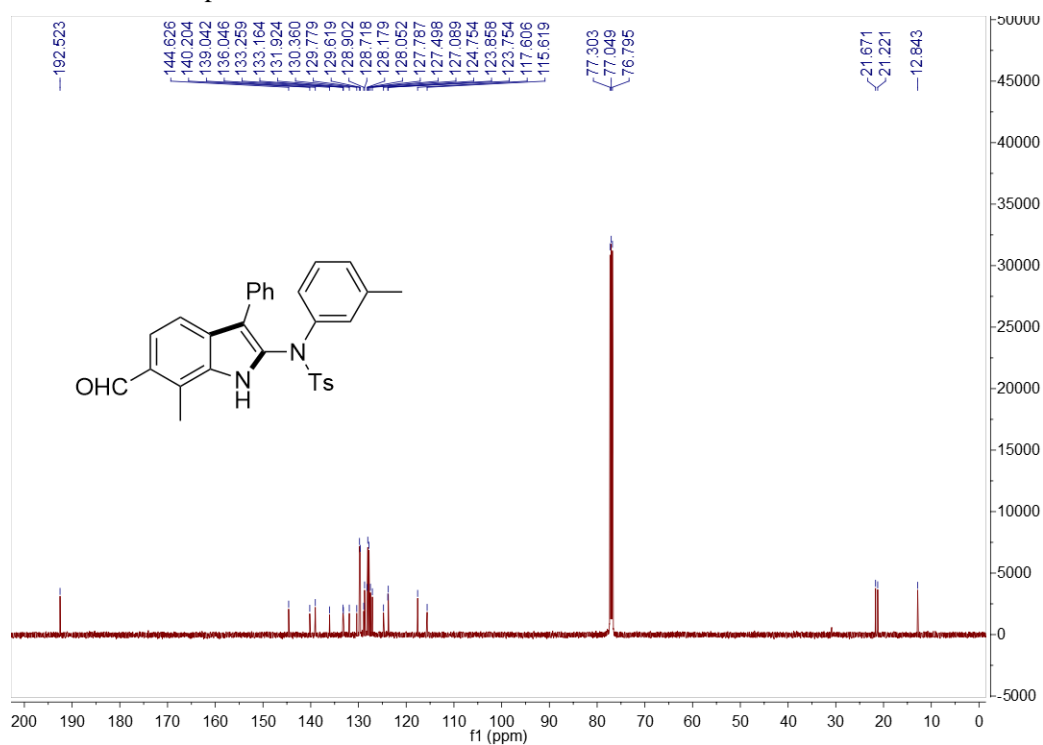

<sup>1</sup>H NMR of compound **31** in CDCl<sub>3</sub>

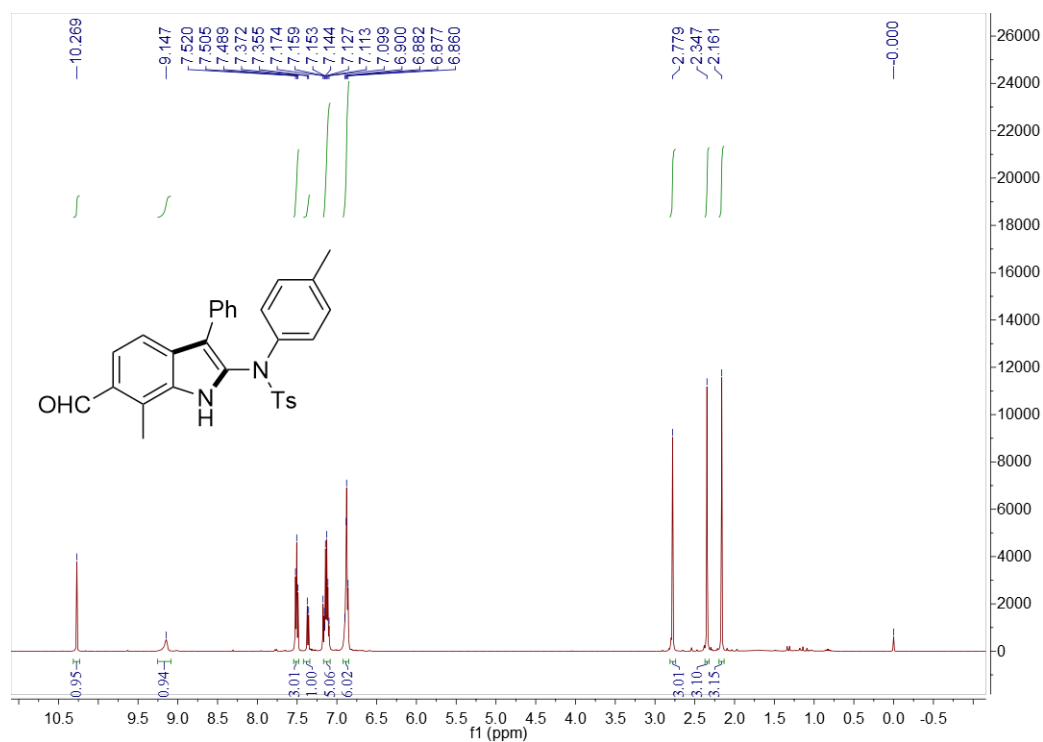

<sup>13</sup>C NMR of compound **31** in CDCl<sub>3</sub>

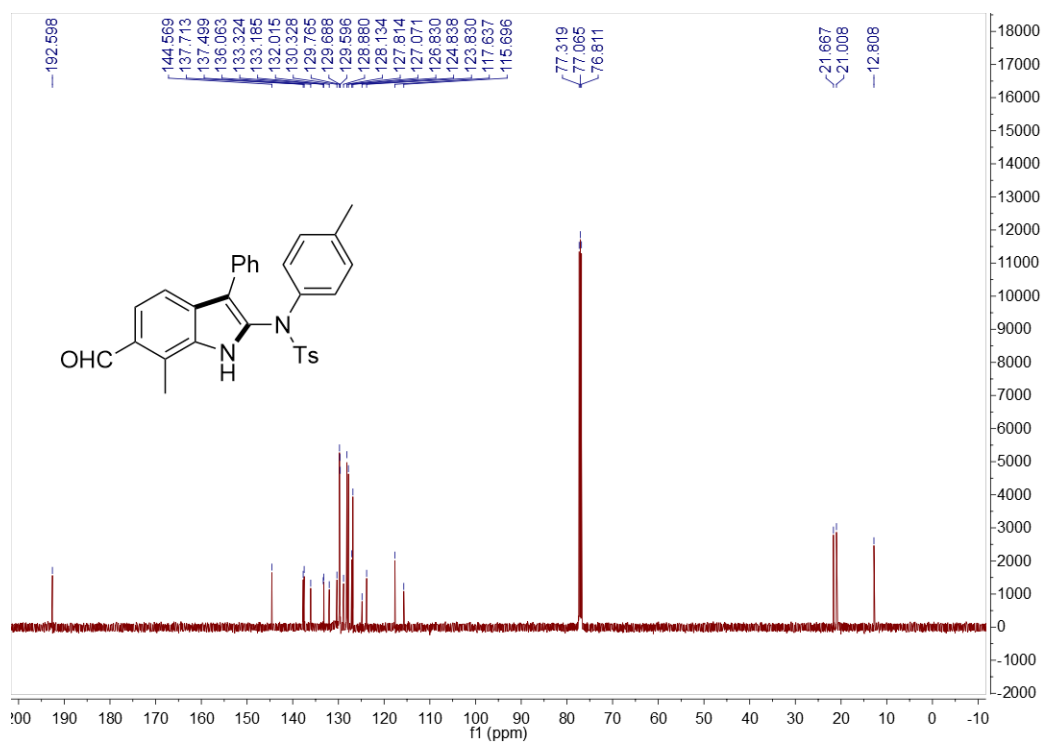

$^1\text{H}$  NMR of compound **3m** in  $\text{CDCl}_3$

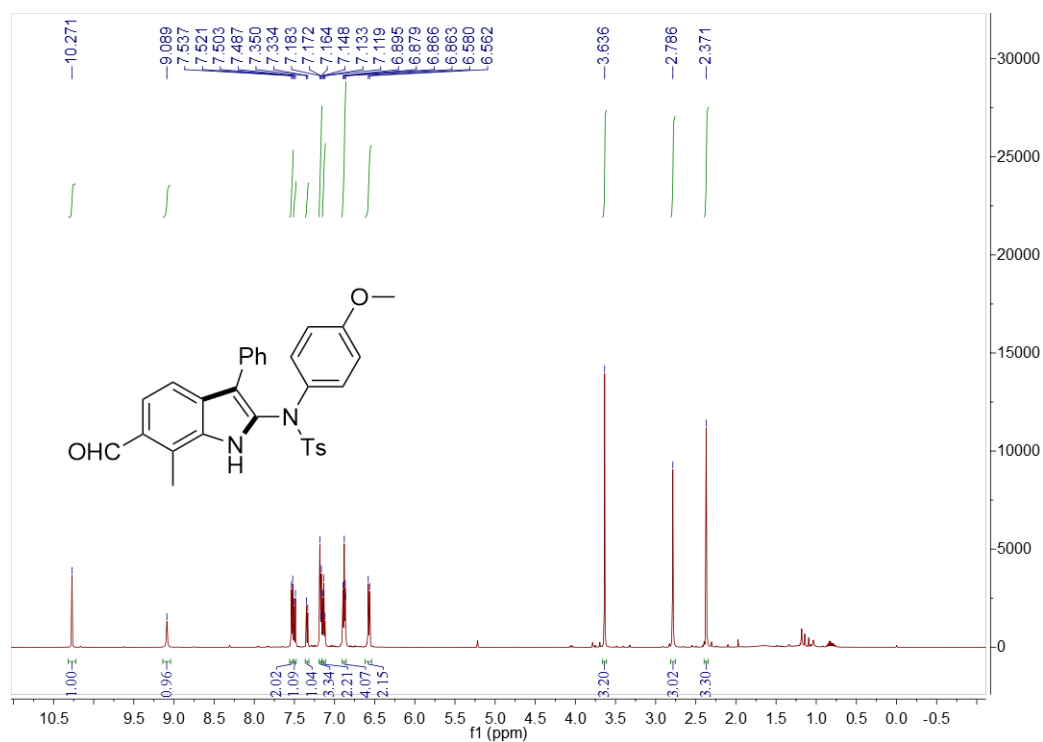

$^{13}\text{C}$  NMR of compound **3m** in  $\text{CDCl}_3$

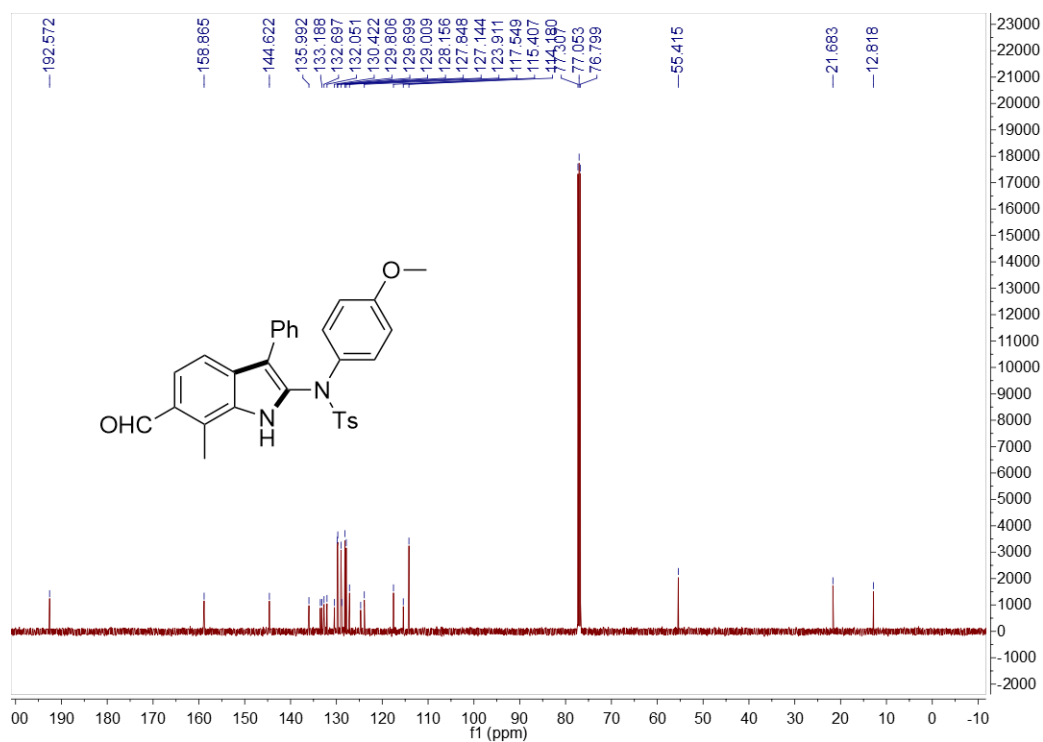

$^1\text{H}$  NMR of compound **3n** in  $\text{CDCl}_3$

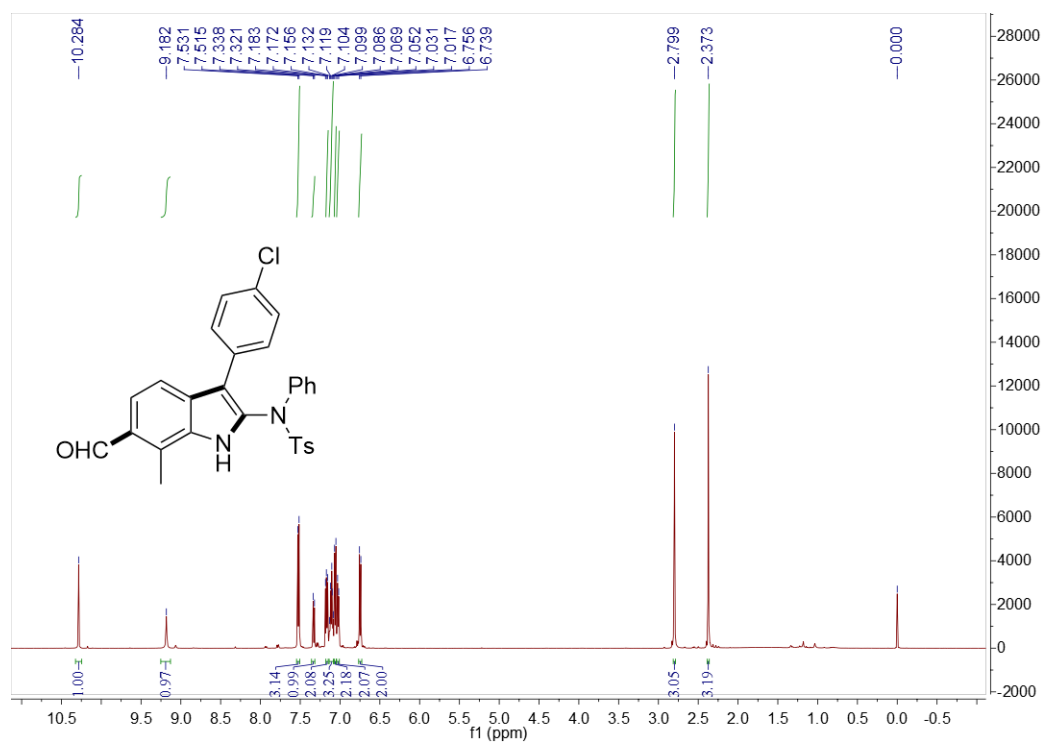

$^{13}\text{C}$  NMR of compound **3n** in  $\text{CDCl}_3$

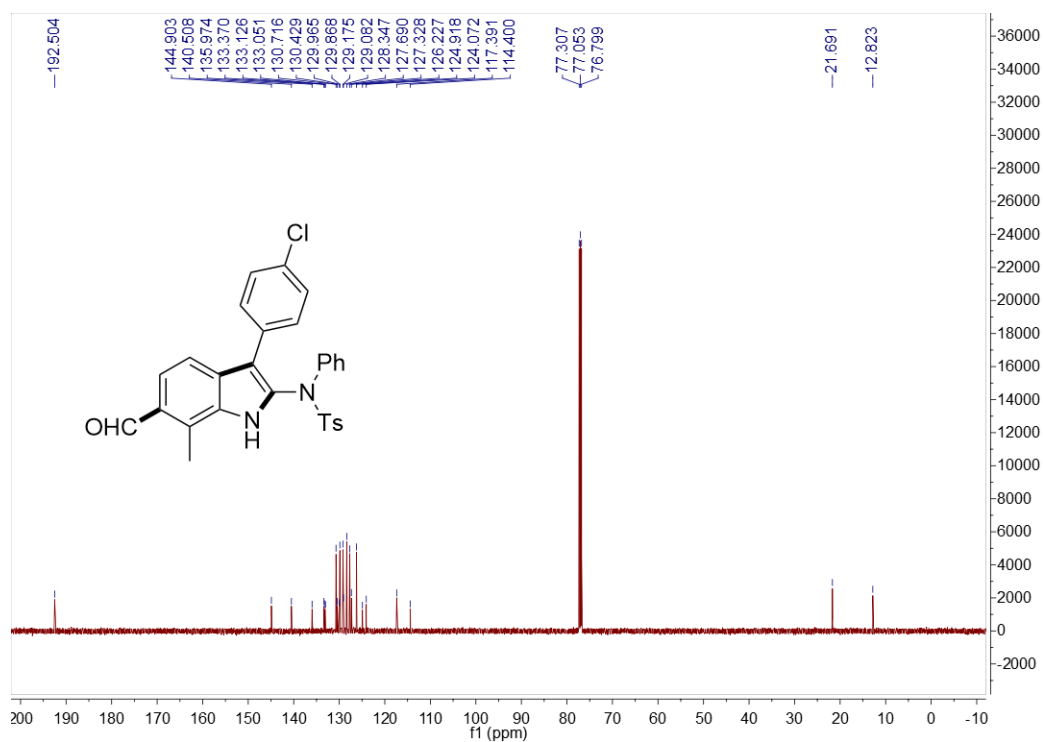

$^1\text{H}$  NMR of compound **3o** in  $\text{DMSO-}d_6$

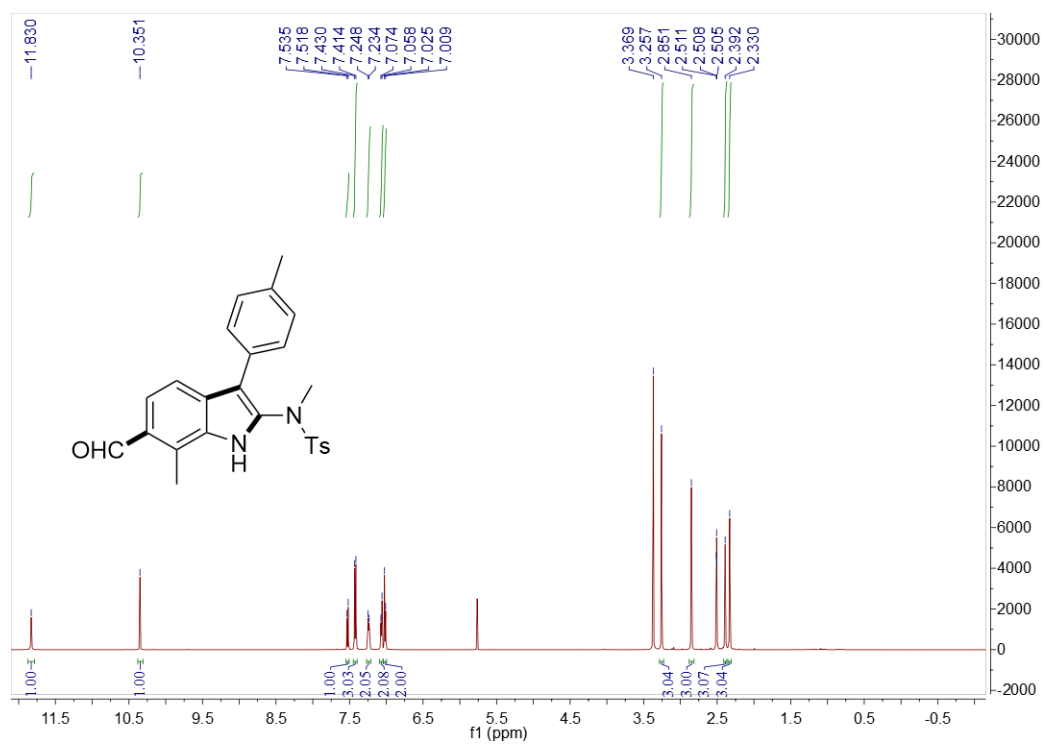

$^{13}\text{C}$  NMR of compound **3o** in  $\text{DMSO-}d_6$

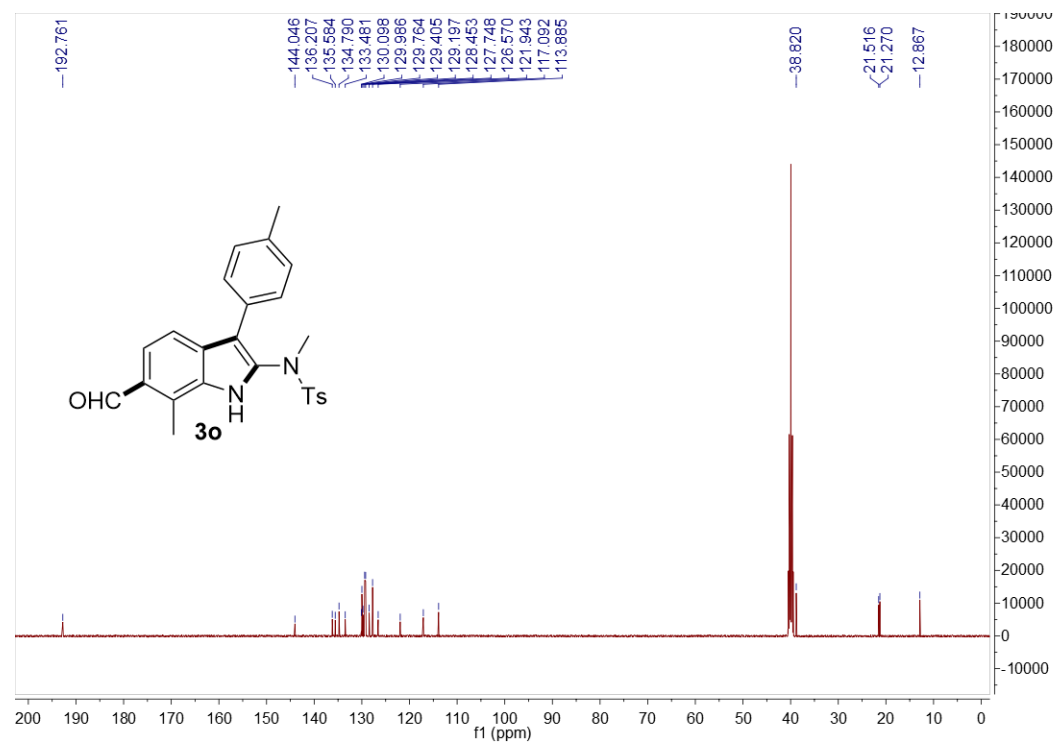

$^1\text{H}$  NMR of compound **3p** in  $\text{DMSO-}d_6$

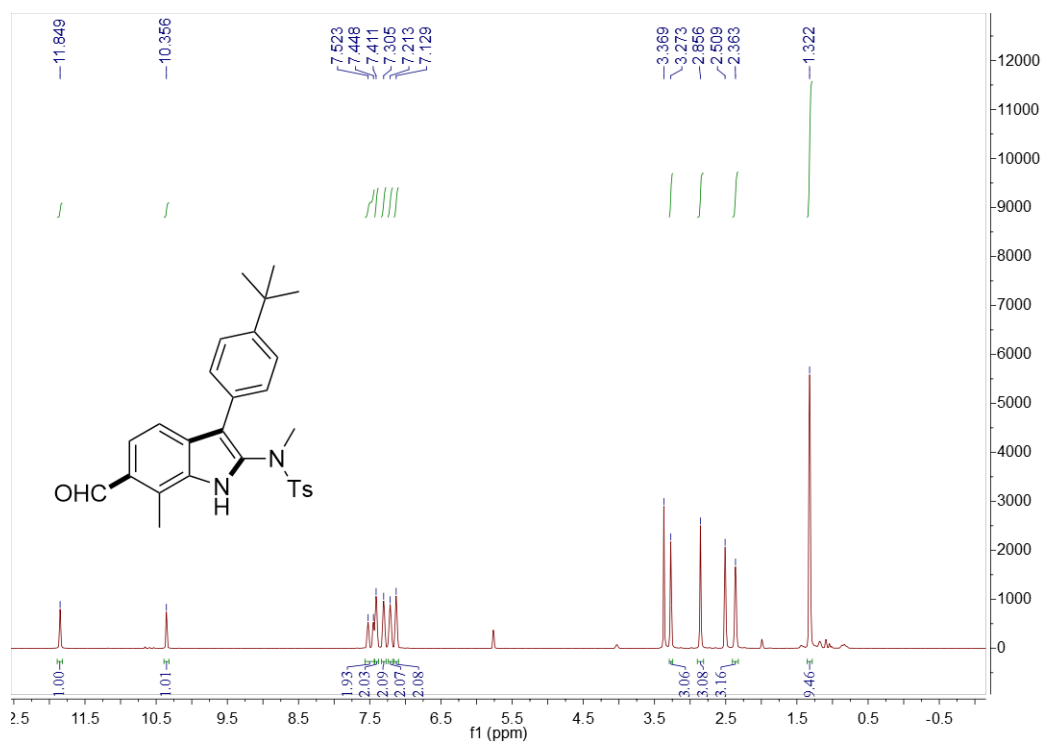

$^{13}\text{C}$  NMR of compound **3p** in  $\text{DMSO-}d_6$

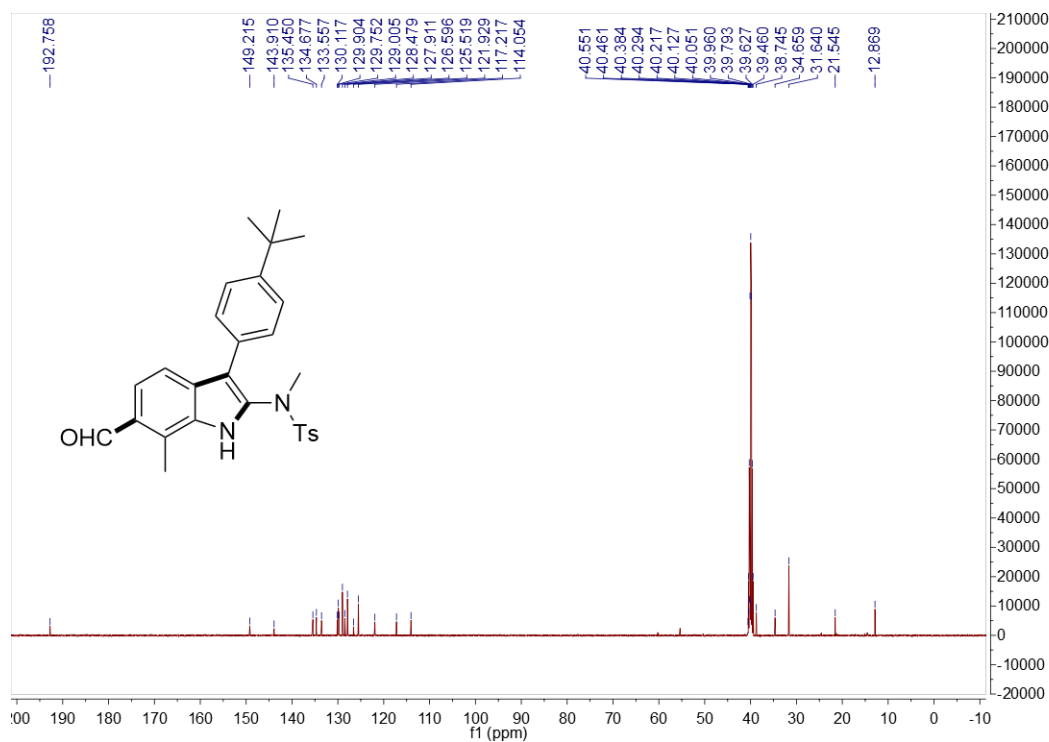

$^1\text{H}$  NMR of compound **3q** in  $\text{DMSO-}d_6$

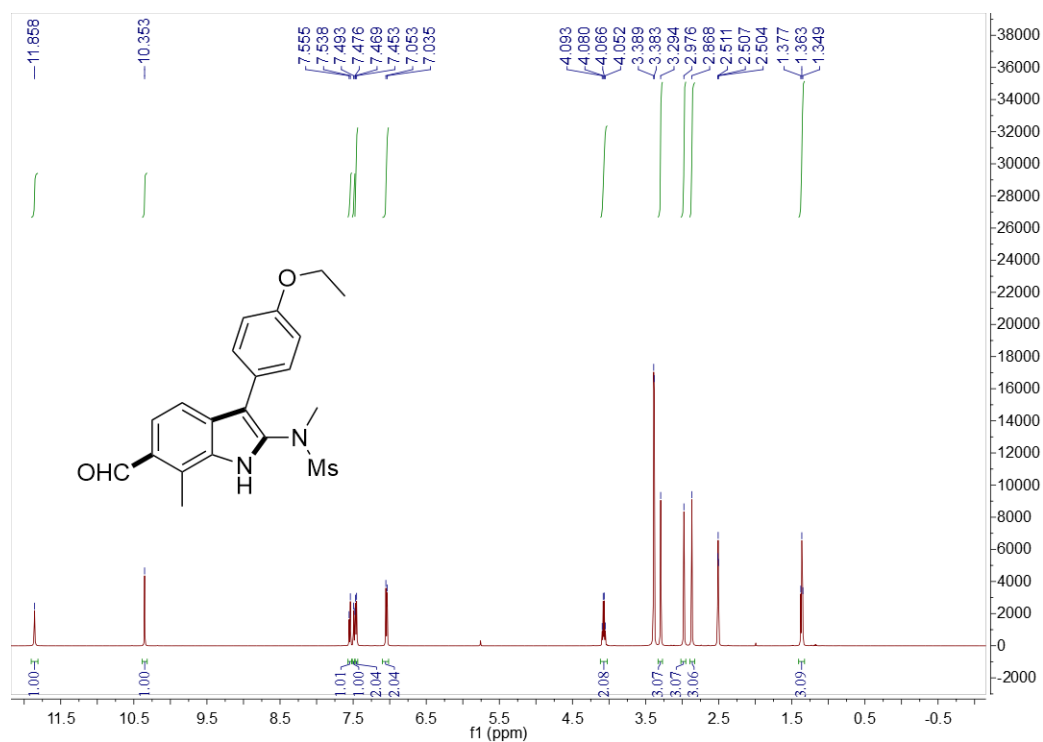

$^{13}\text{C}$  NMR of compound **3q** in  $\text{DMSO-}d_6$

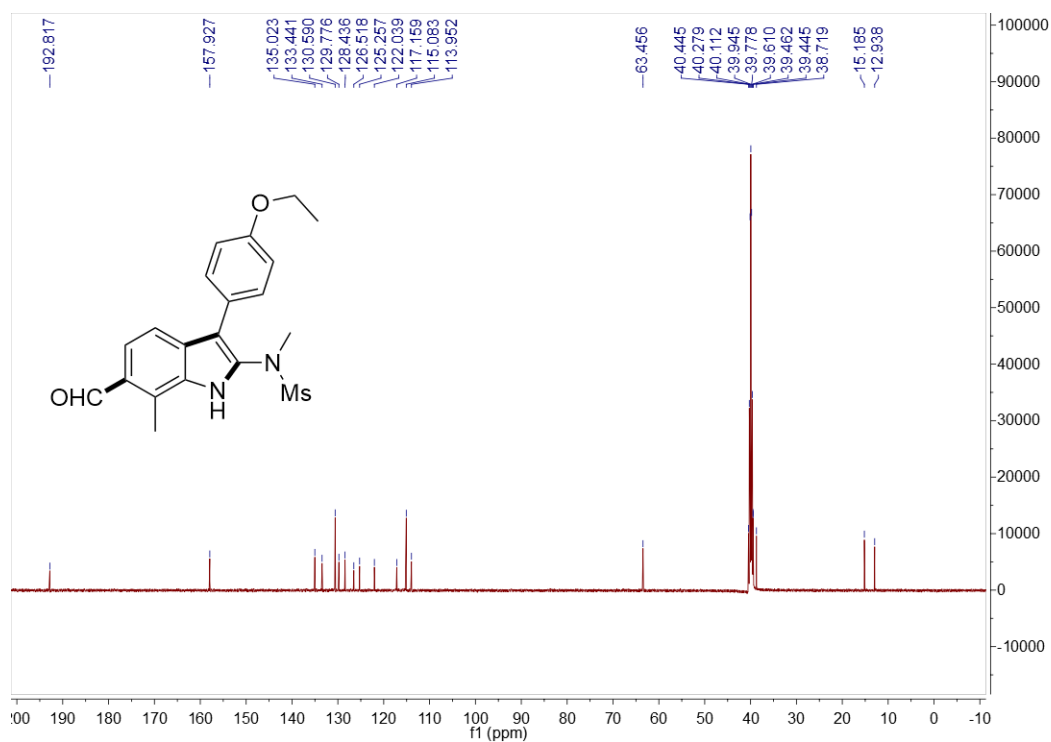

<sup>1</sup>H NMR of compound **3r** in CDCl<sub>3</sub>

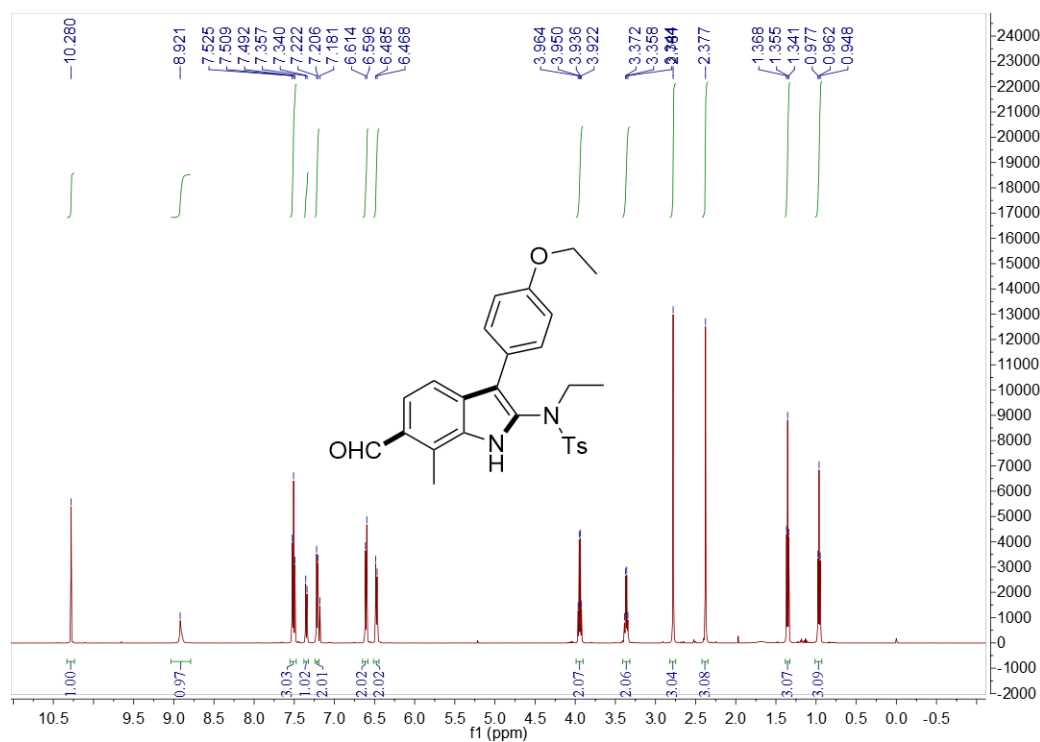

<sup>13</sup>C NMR of compound **3r** in CDCl<sub>3</sub>

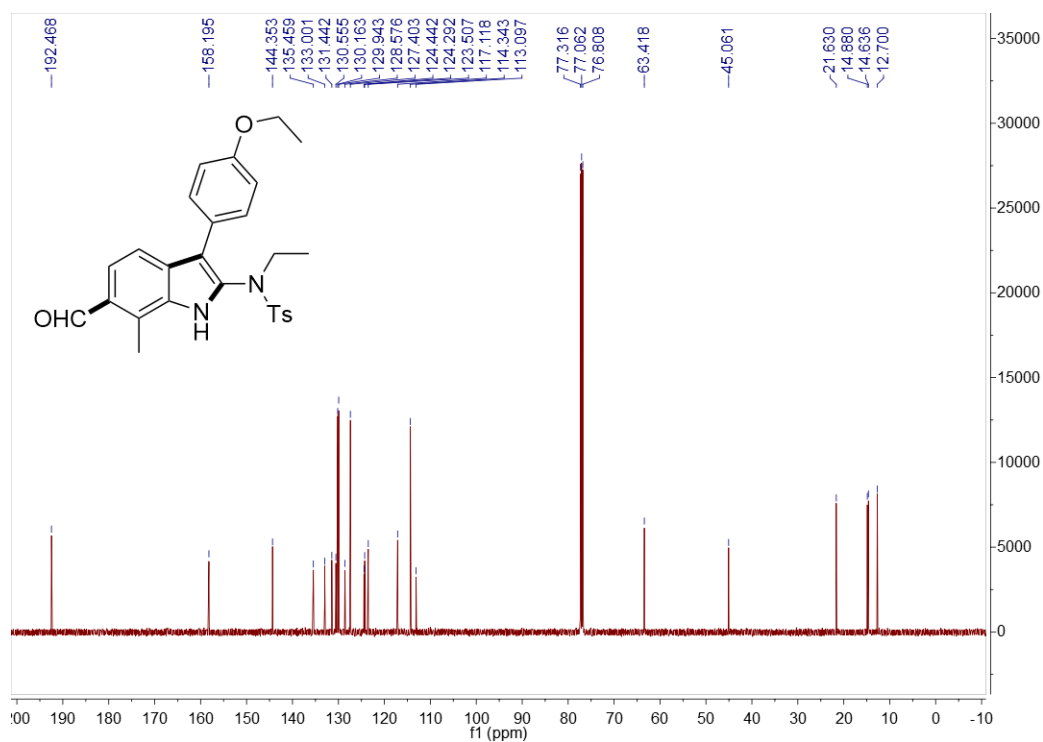



$^1\text{H}$  NMR of compound **3s** in  $\text{DMSO-}d_6$

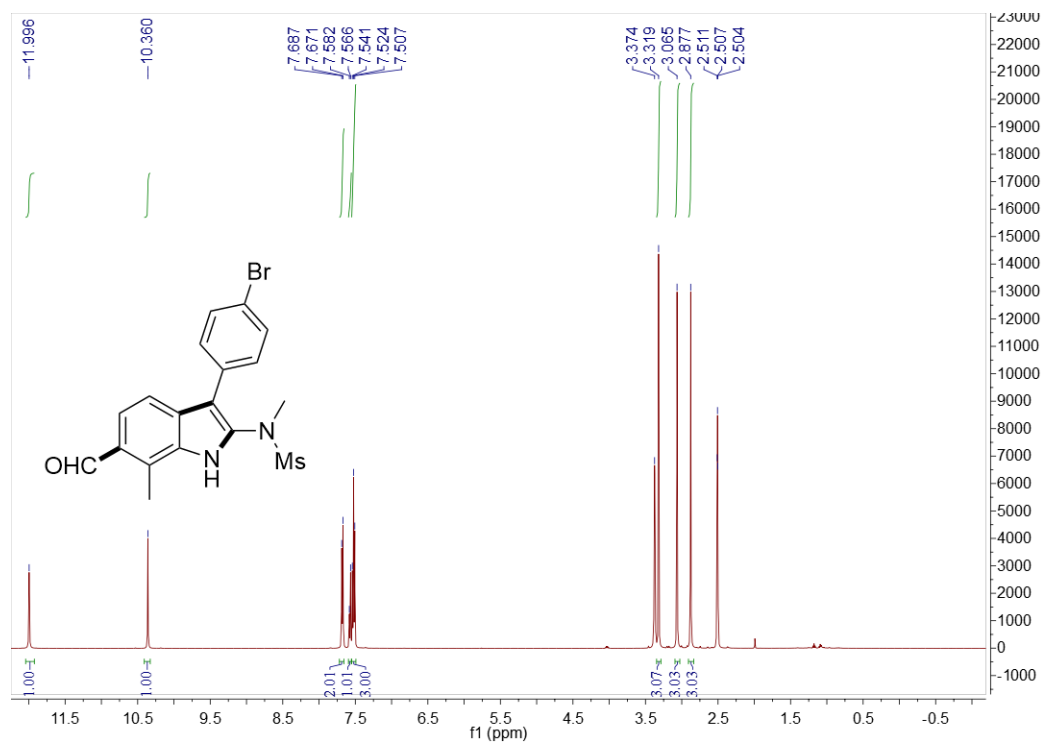

$^{13}\text{C}$  NMR of compound **3s** in  $\text{DMSO-}d_6$

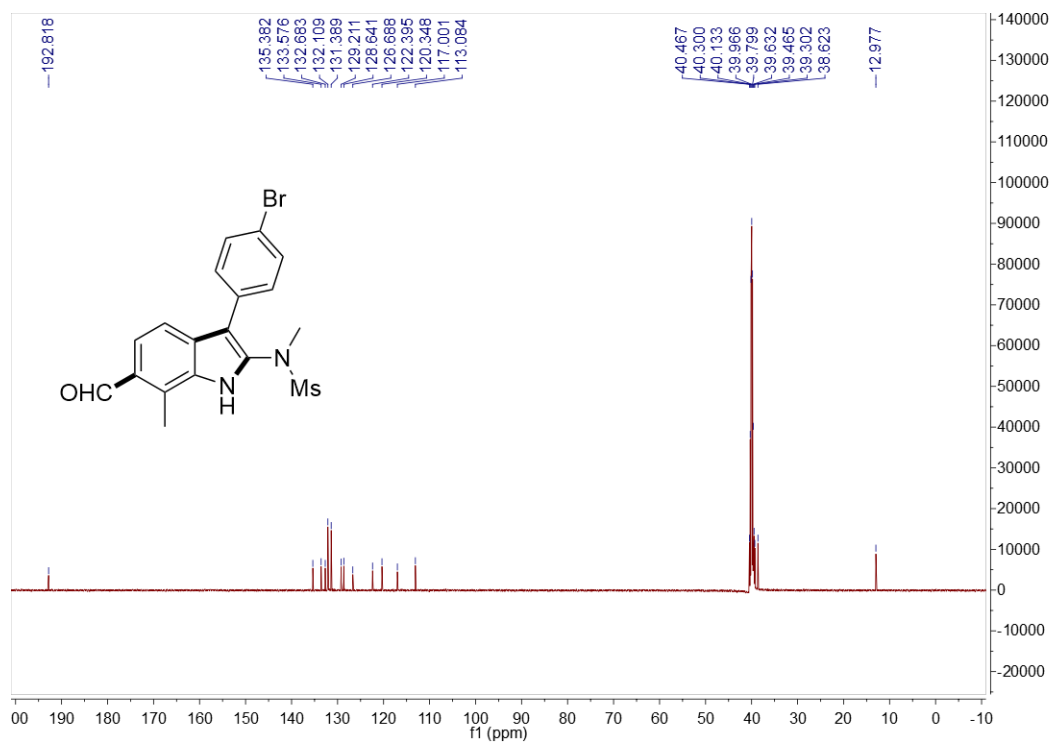

$^1\text{H}$  NMR of compound **3t** in  $\text{DMSO-}d_6$

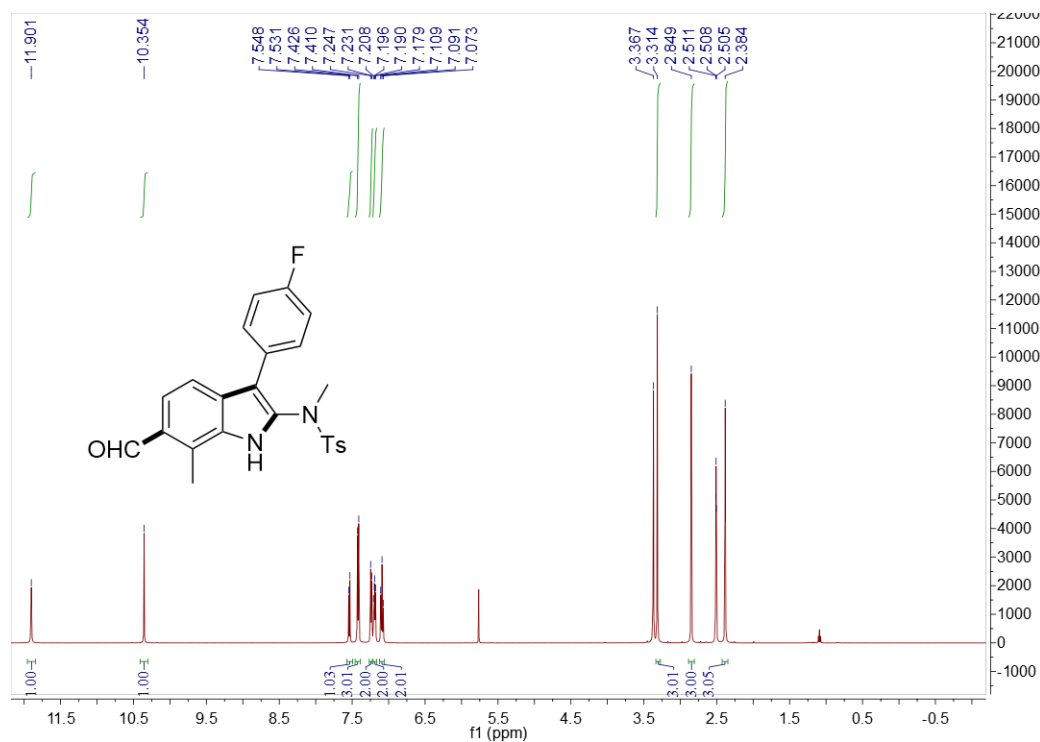

$^{13}\text{C}$  NMR of compound **3t** in  $\text{DMSO-}d_6$

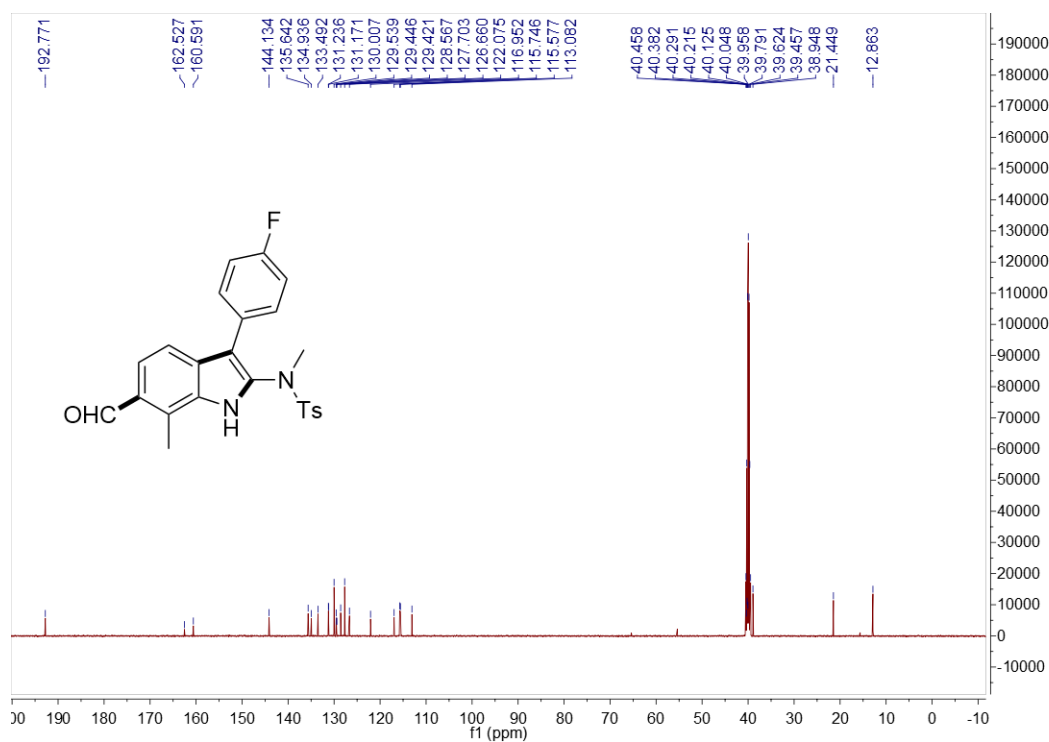

$^1\text{H}$  NMR of compound **3u** in  $\text{DMSO-}d_6$

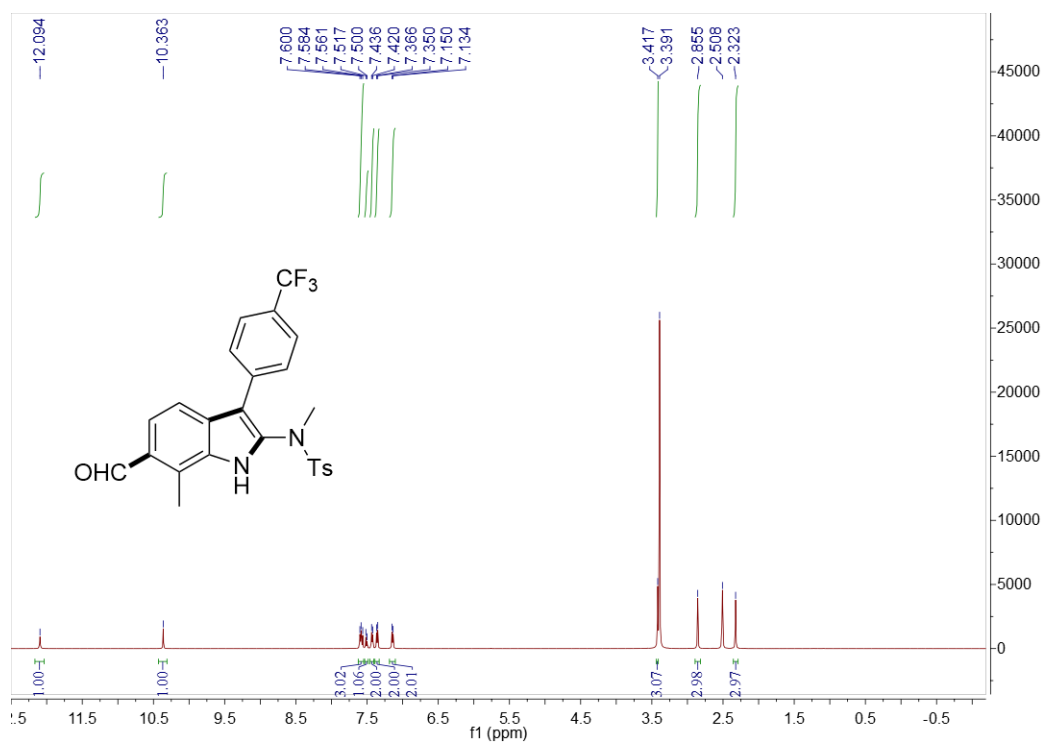

$^{13}\text{C}$  NMR of compound **3u** in  $\text{DMSO-}d_6$

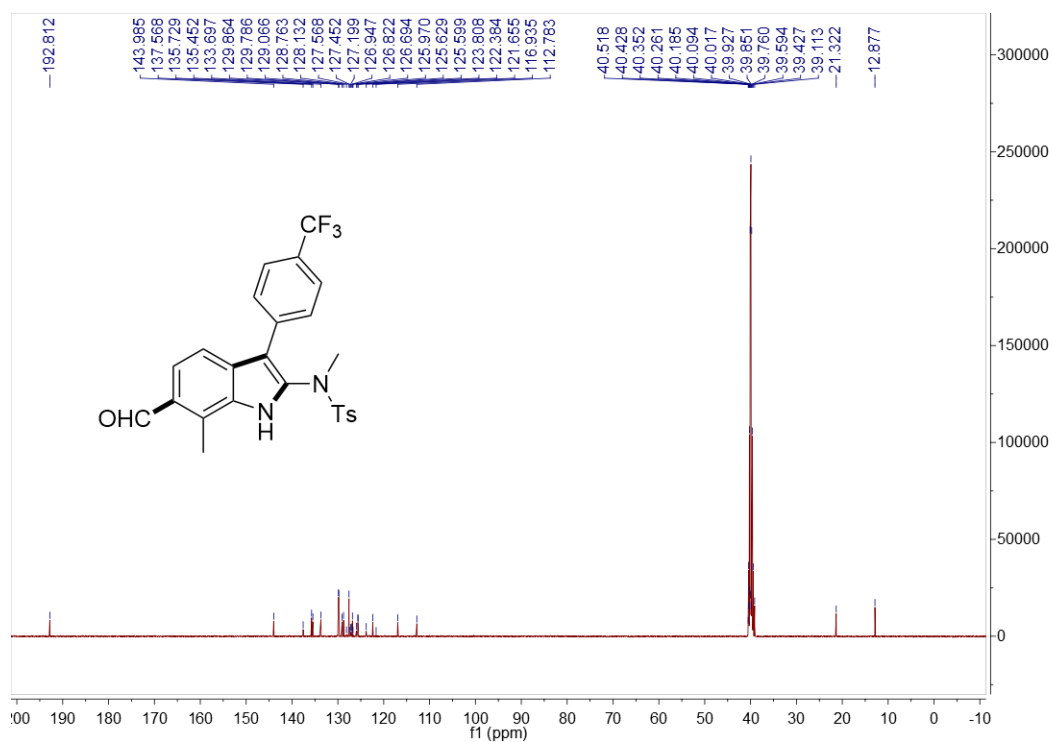

<sup>1</sup>H NMR of compound **3v** in CDCl<sub>3</sub>

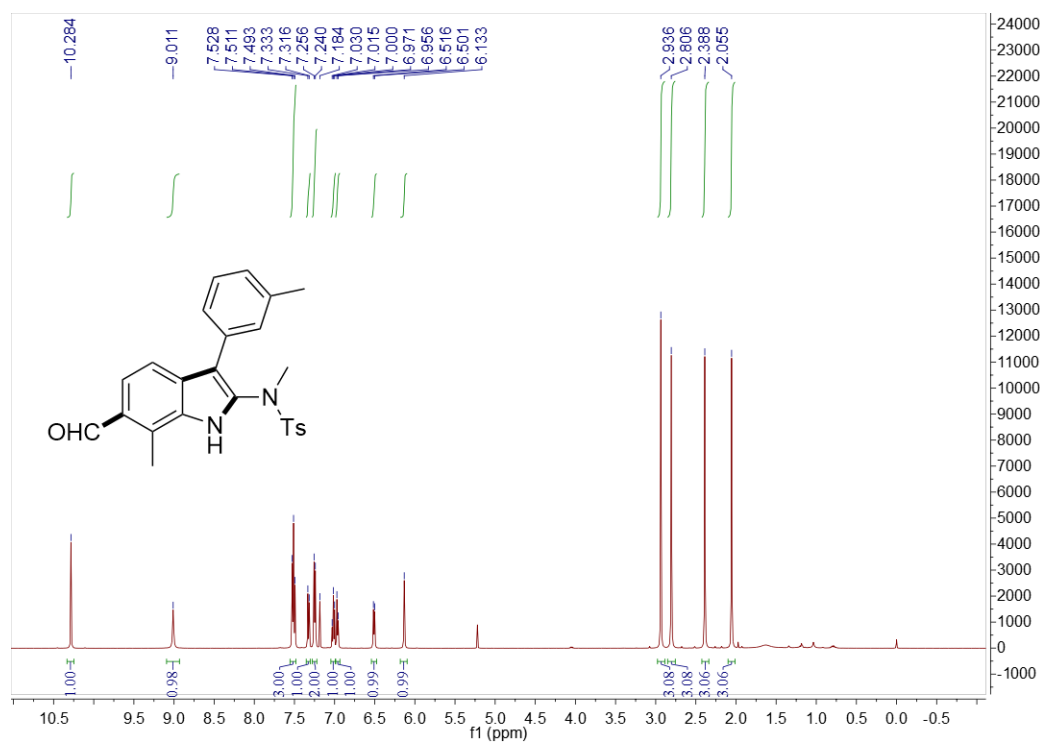

<sup>13</sup>C NMR of compound **3v** in CDCl<sub>3</sub>

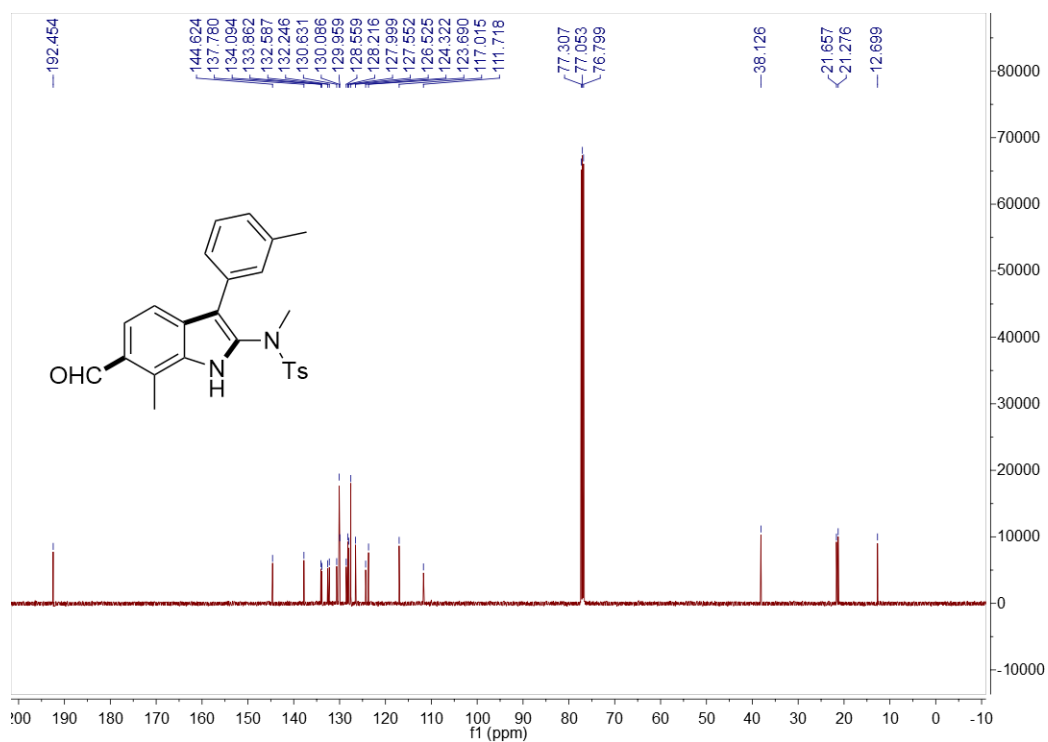

<sup>1</sup>H NMR of compound **3w** in DMSO-*d*<sub>6</sub>

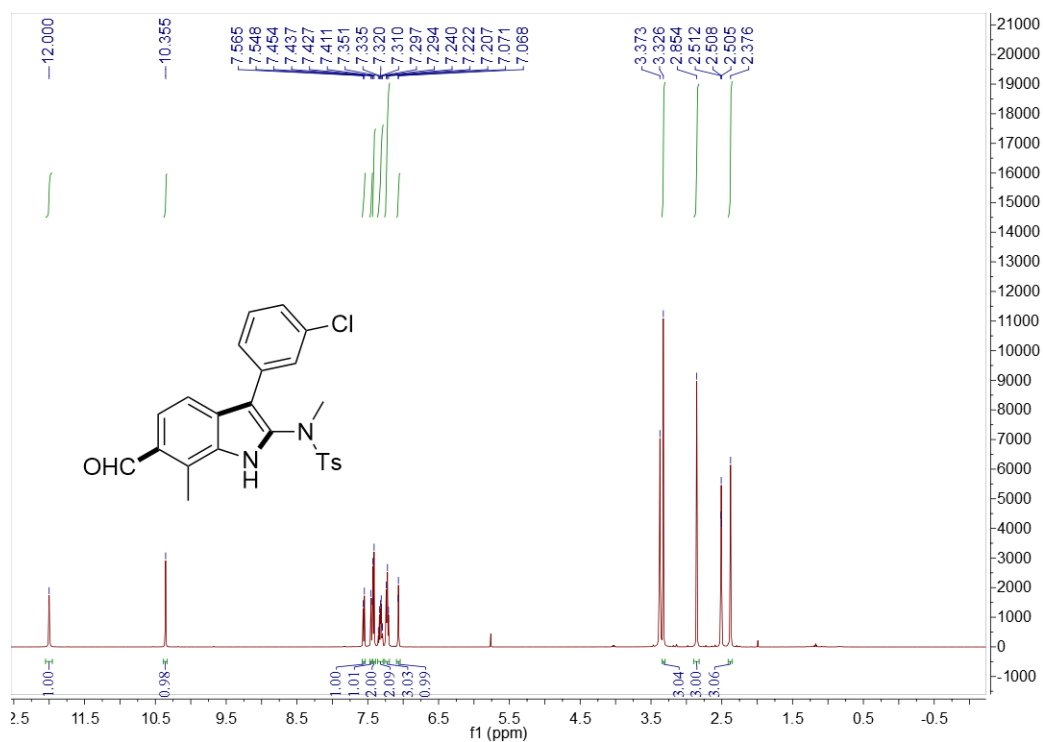

<sup>13</sup>C NMR of compound **3w** in DMSO-*d*<sub>6</sub>

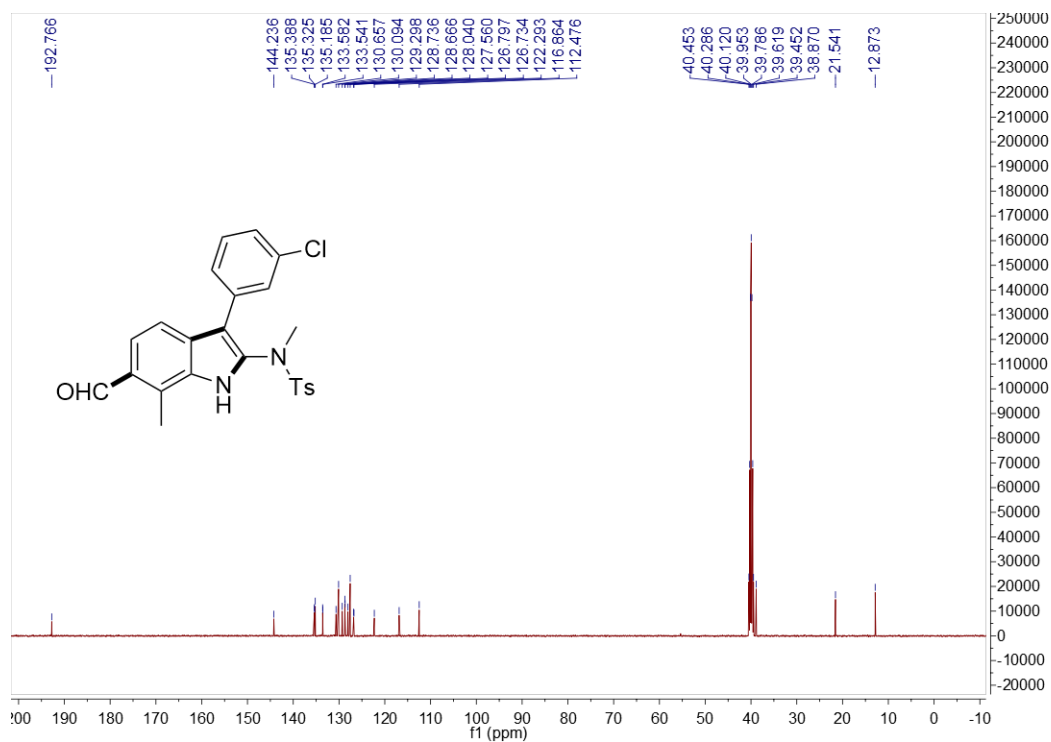

<sup>1</sup>H NMR of compound **3x** in CDCl<sub>3</sub>

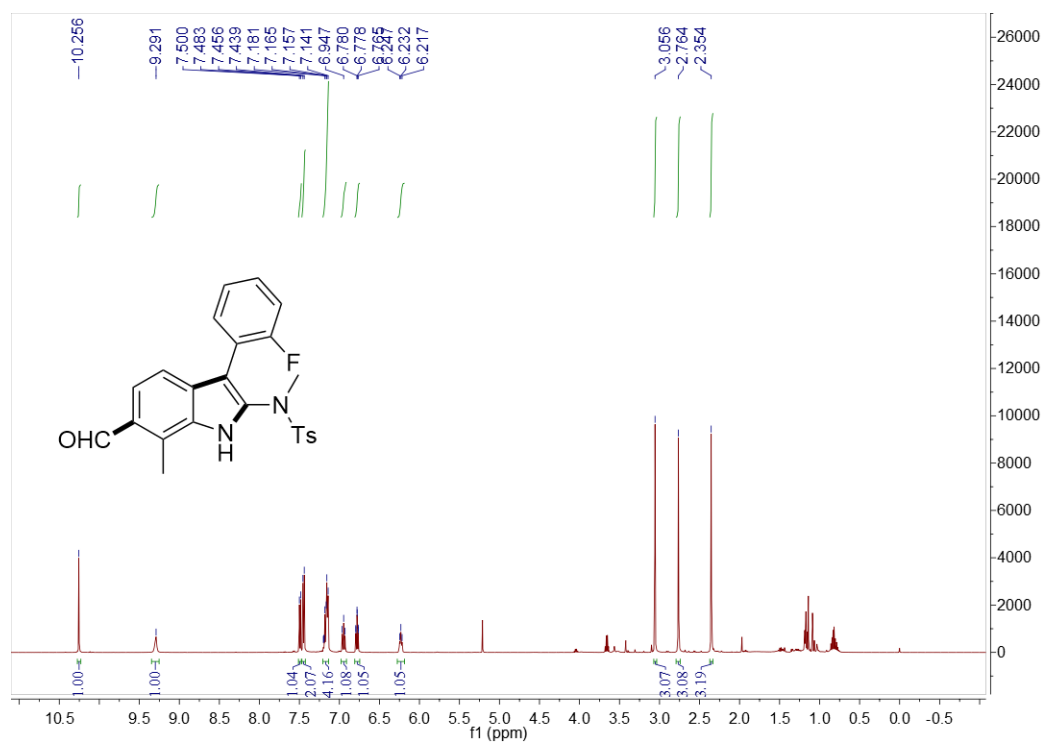

<sup>13</sup>C NMR of compound **3x** in CDCl<sub>3</sub>

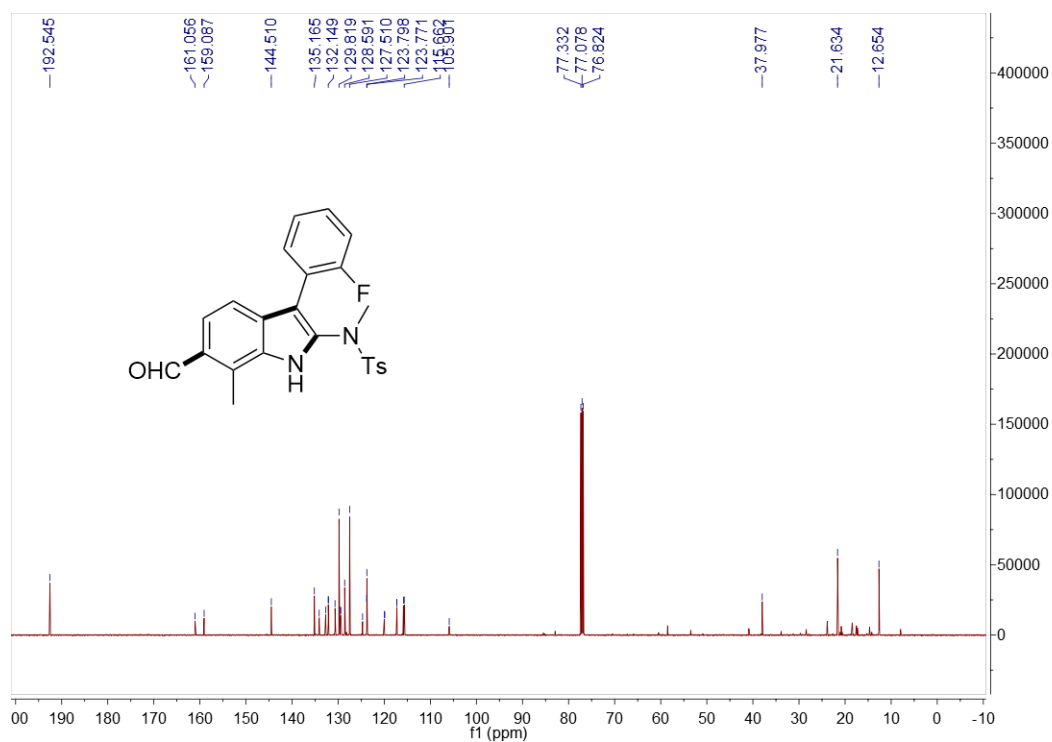

<sup>1</sup>H NMR of compound **3y** in CDCl<sub>3</sub>

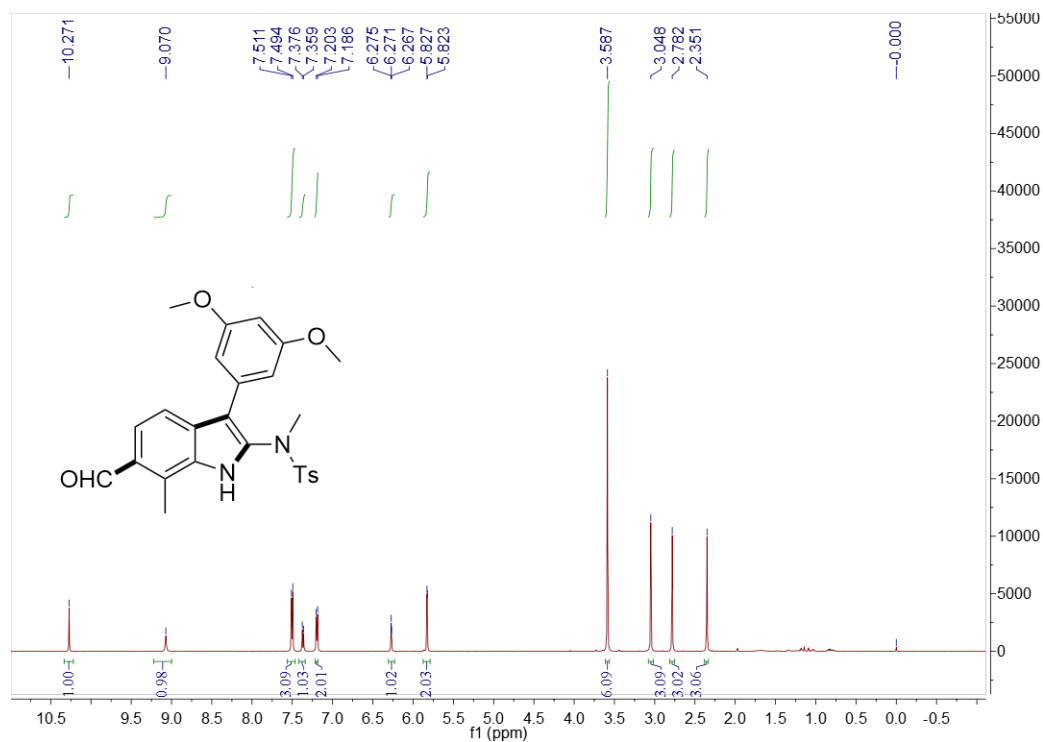

<sup>13</sup>C NMR of compound **3y** in CDCl<sub>3</sub>

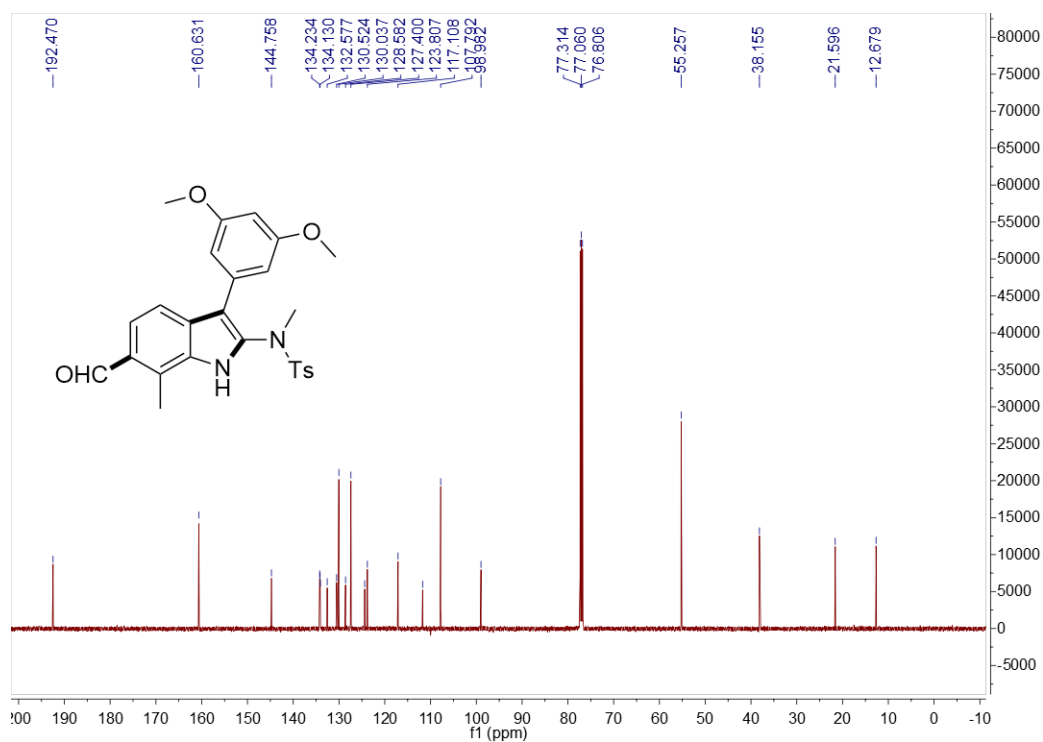





<sup>1</sup>H NMR of compound **3aa** in CDCl<sub>3</sub>

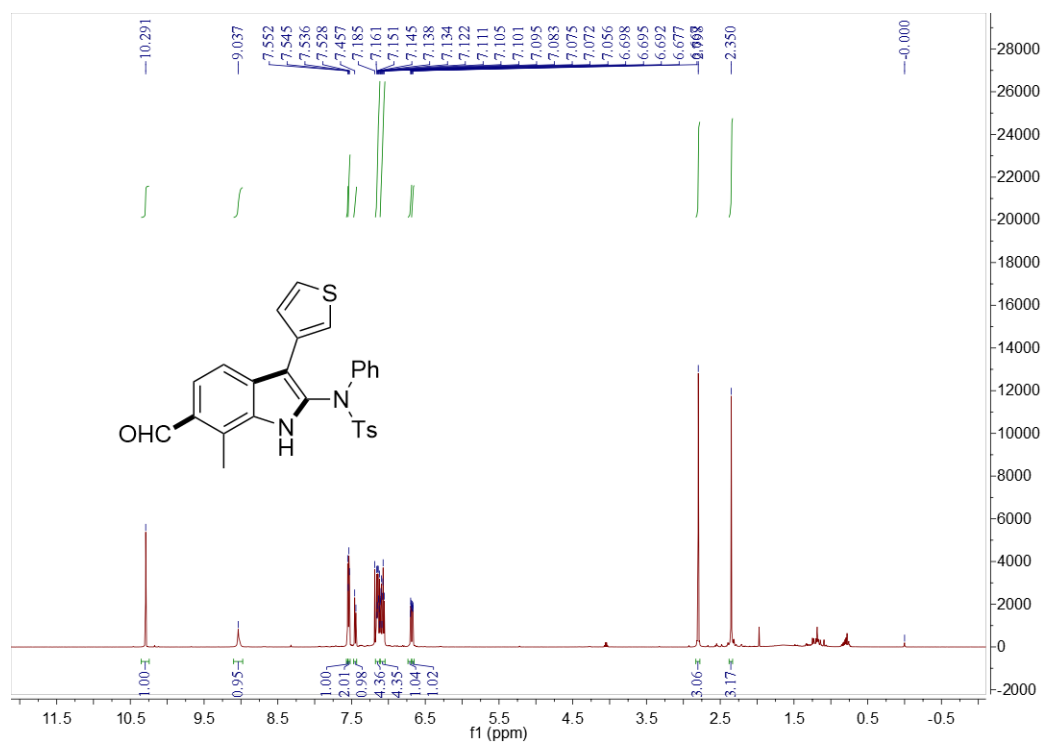

<sup>13</sup>C NMR of compound **3aa** in CDCl<sub>3</sub>

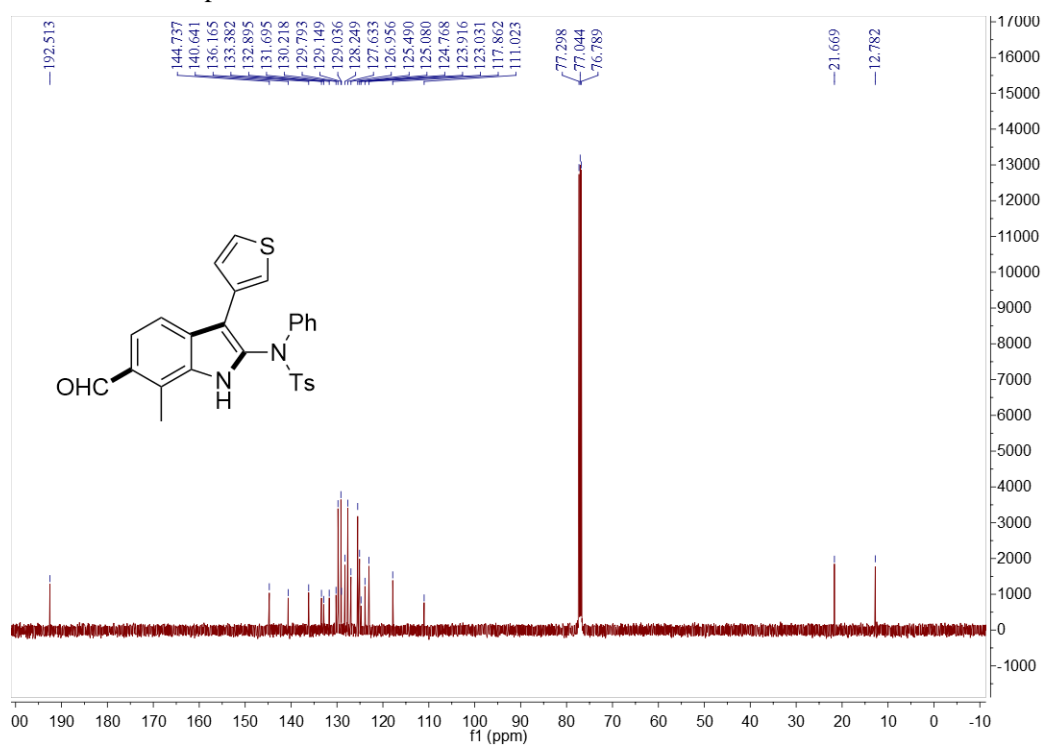

<sup>1</sup>H NMR of compound **3ab** in CDCl<sub>3</sub>

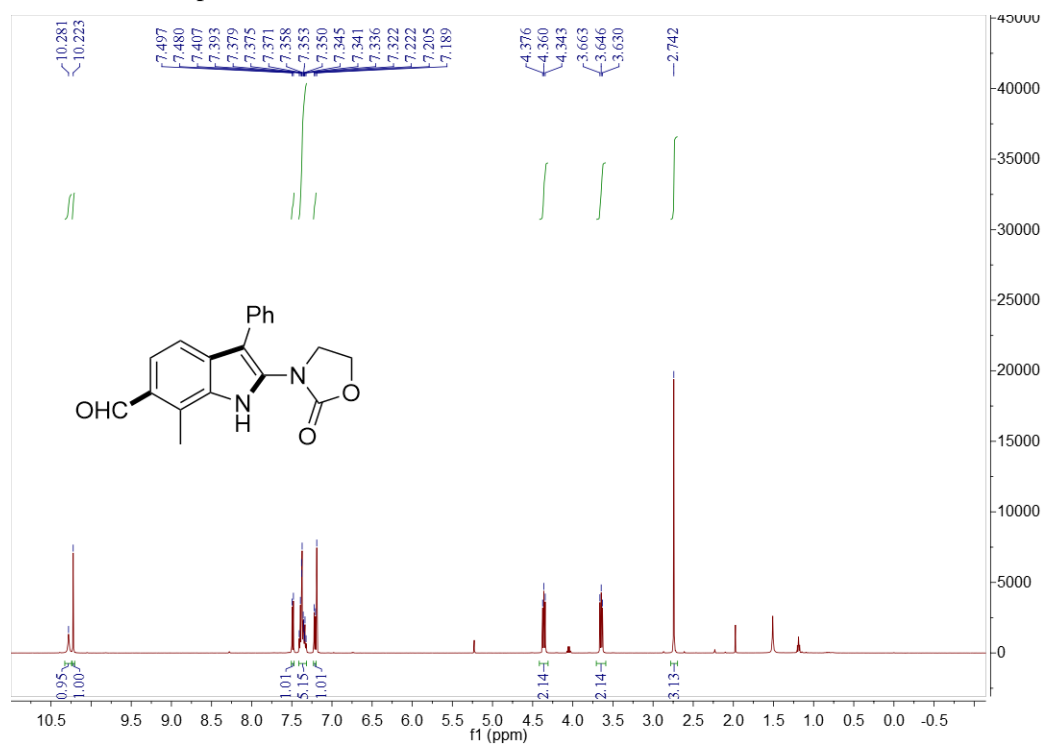

<sup>13</sup>C NMR of compound **3ab** in CDCl<sub>3</sub>

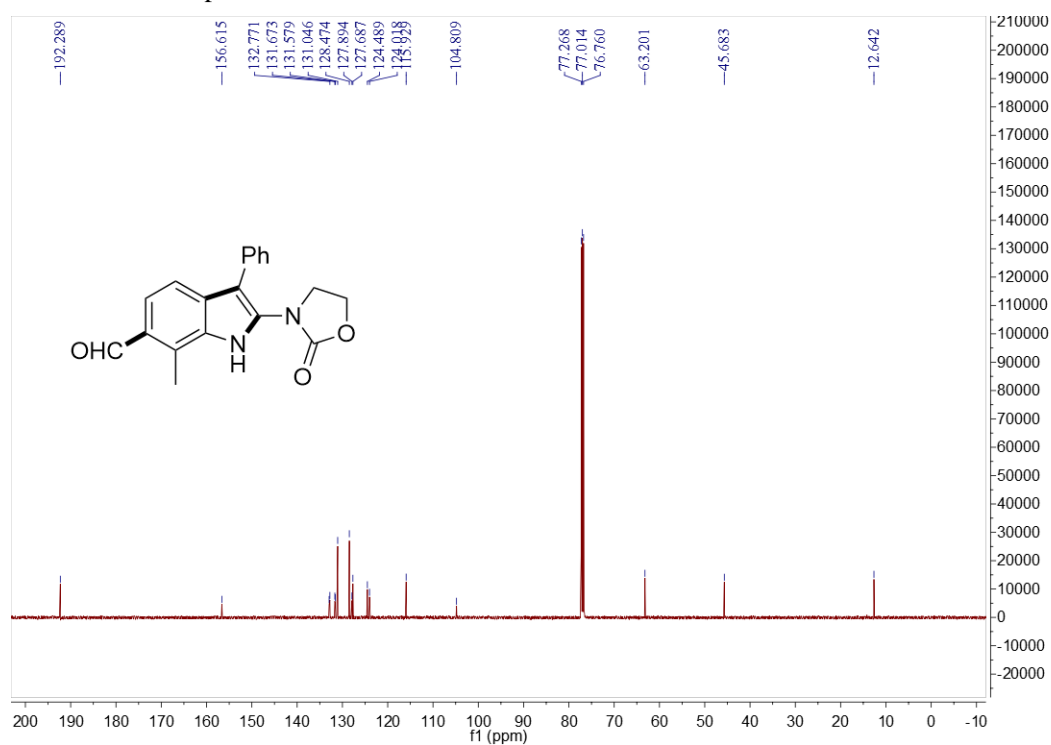

<sup>1</sup>H NMR of compound **3ac** in CDCl<sub>3</sub>

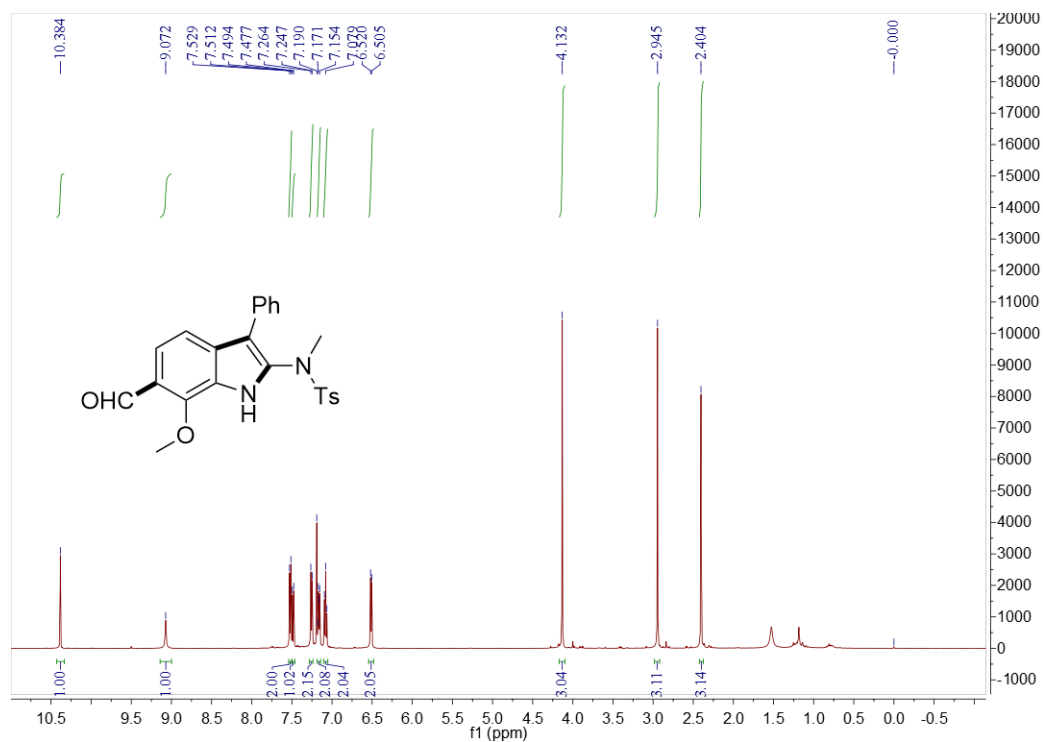

<sup>13</sup>C NMR of compound **3ac** in CDCl<sub>3</sub>

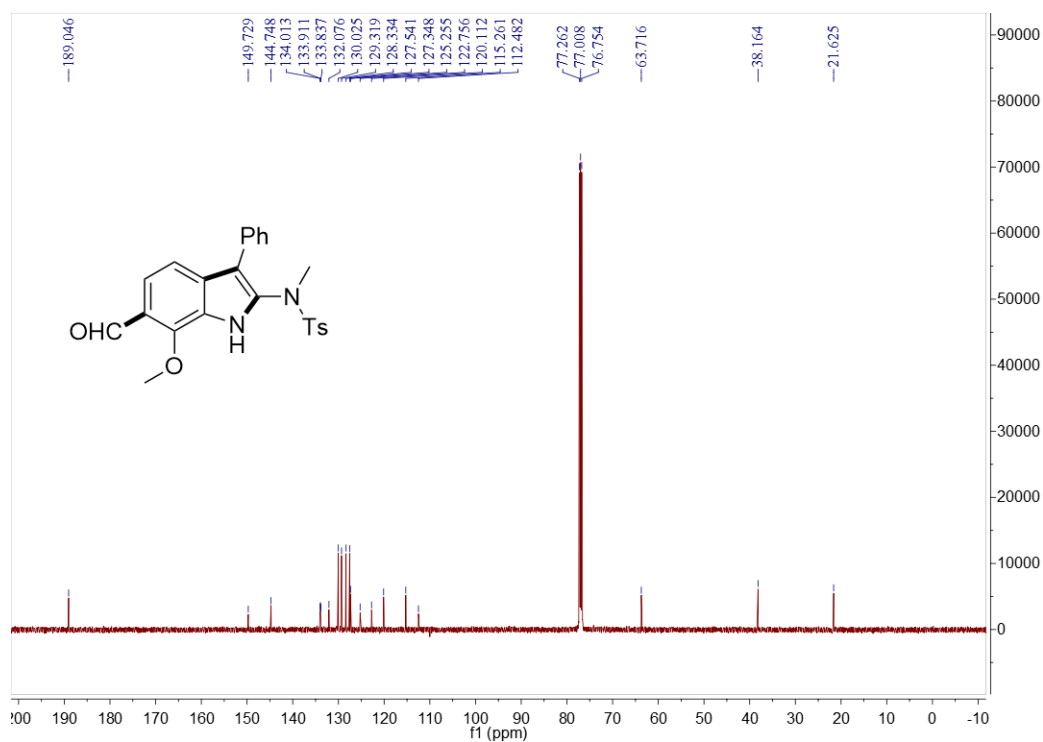

<sup>1</sup>H NMR of compound **3ad** in CDCl<sub>3</sub>

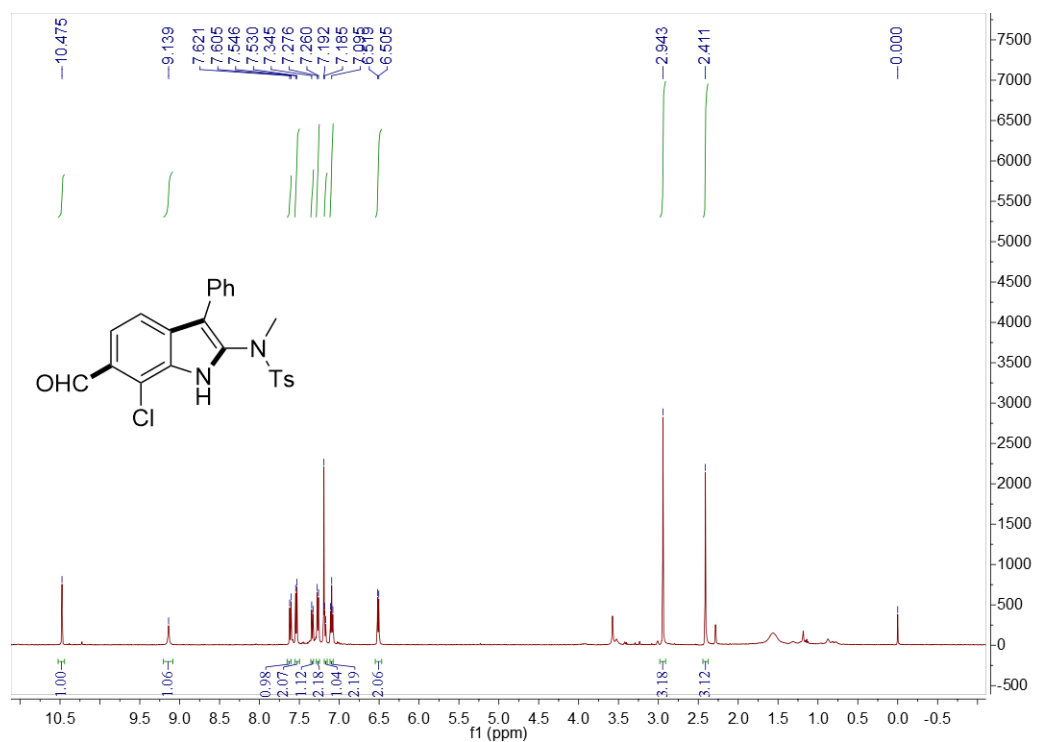

<sup>13</sup>C NMR of compound **3ad** in CDCl<sub>3</sub>

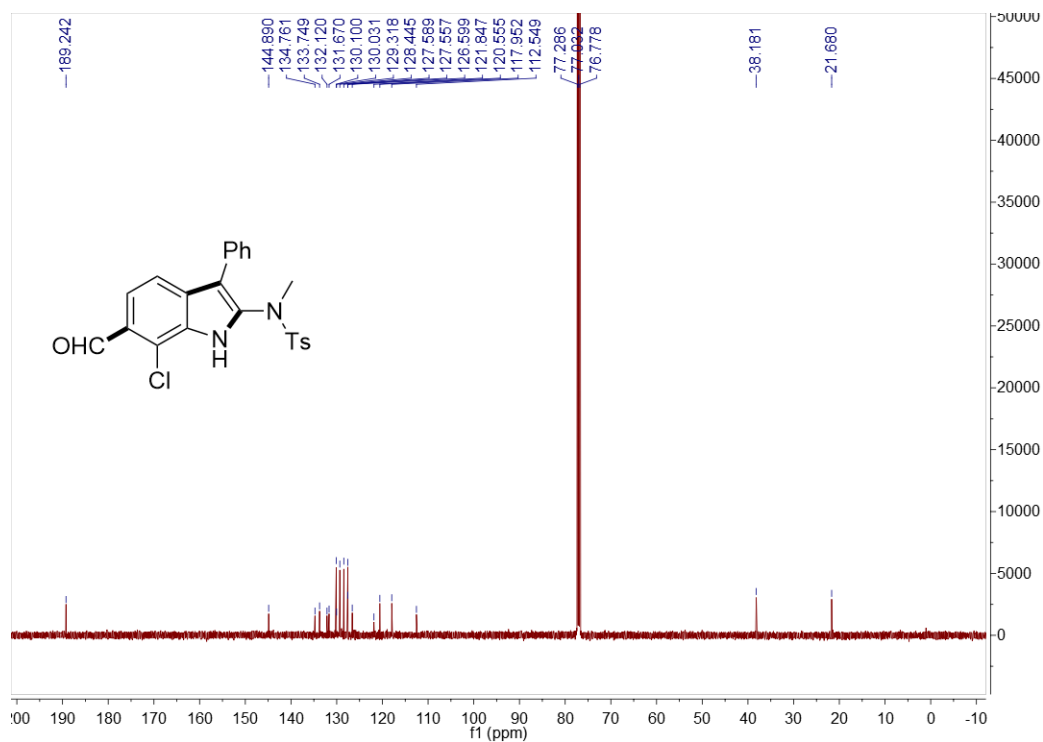

$^1\text{H}$  NMR of compound **3ae** in  $\text{CDCl}_3$

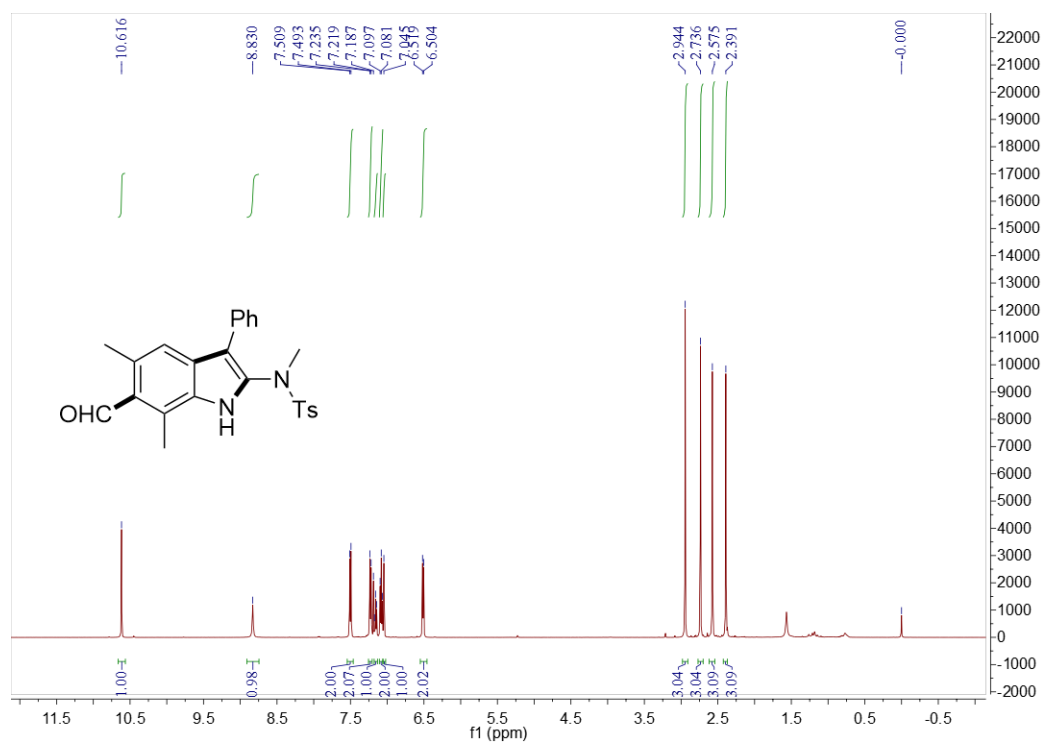

$^{13}\text{C}$  NMR of compound **3ae** in  $\text{CDCl}_3$

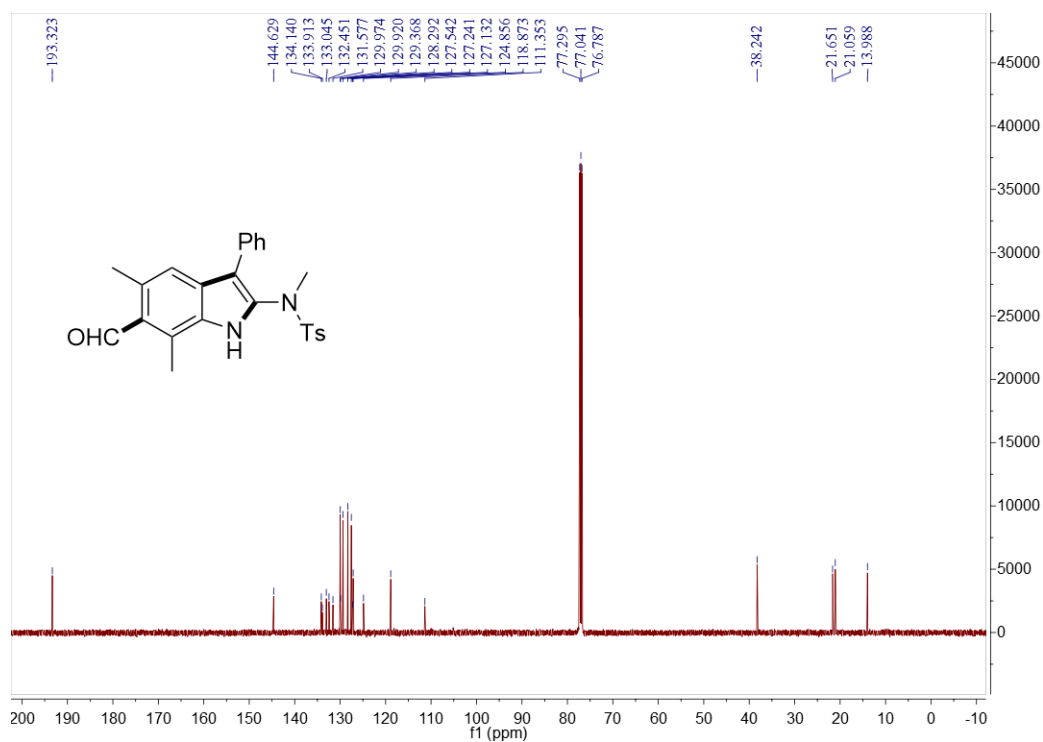

2D NOESY of **3ae** in CDCl<sub>3</sub>

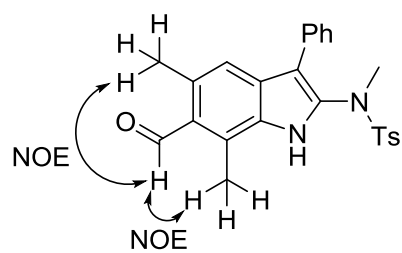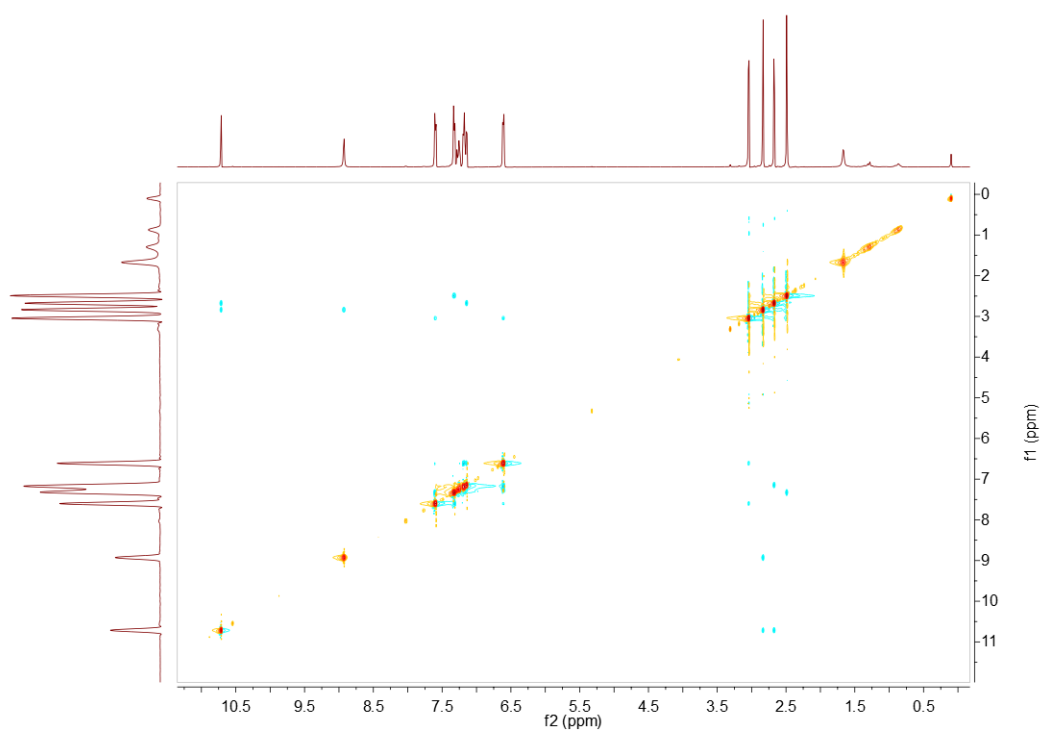

<sup>1</sup>H NMR of compound **3af** in DMSO-*d*<sub>6</sub>

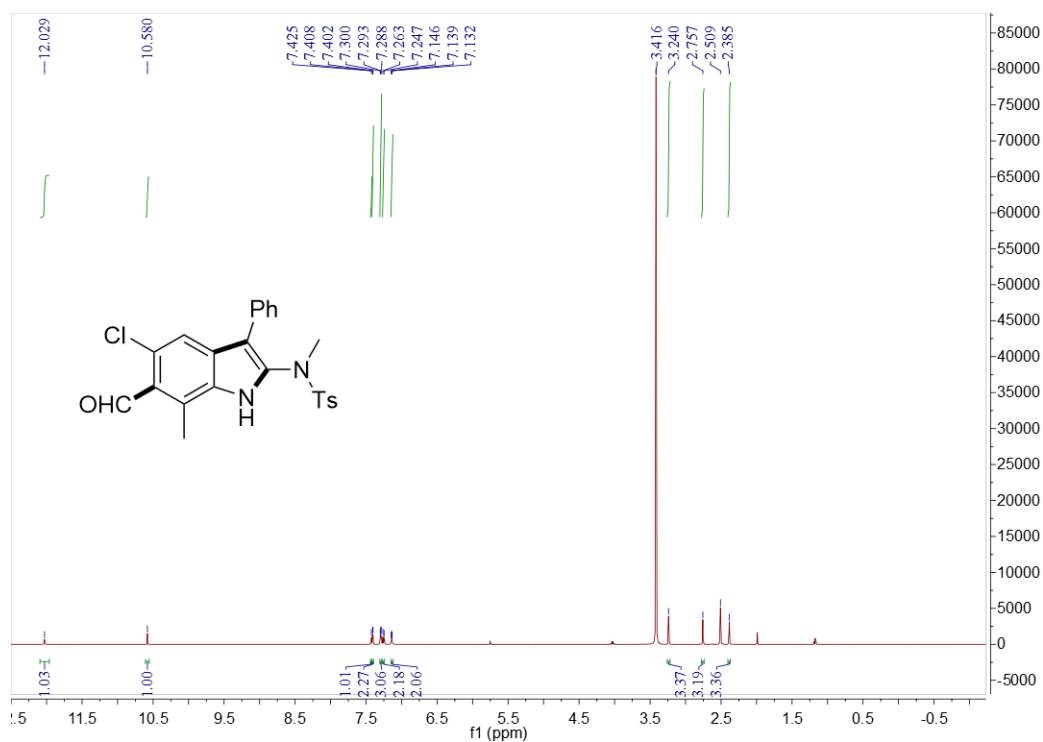

<sup>13</sup>C NMR of compound **3af** in DMSO-*d*<sub>6</sub>

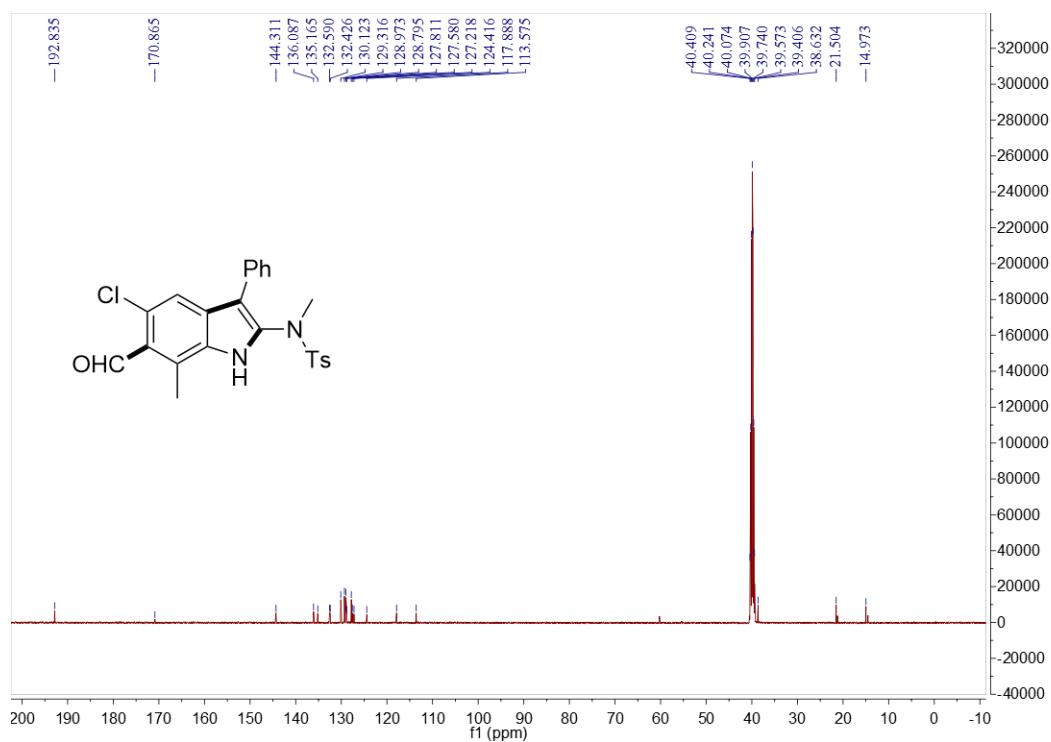

$^1\text{H}$  NMR of compound **4a** in  $\text{DMSO-}d_6$

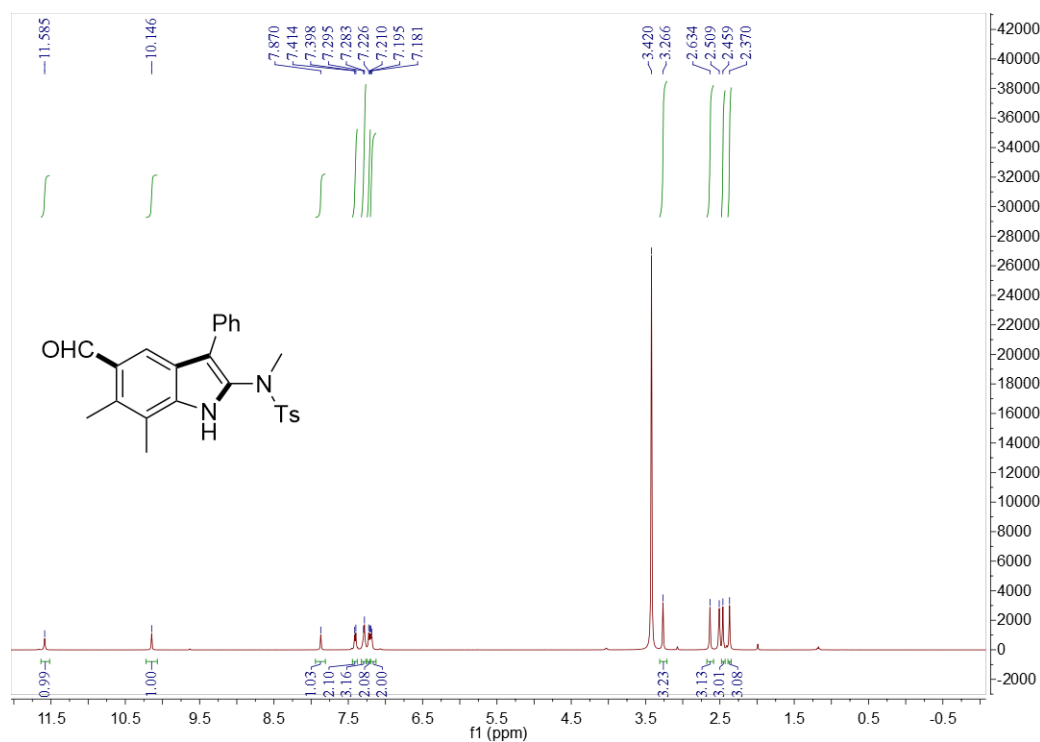

$^{13}\text{C}$  NMR of compound **4a** in  $\text{DMSO-}d_6$

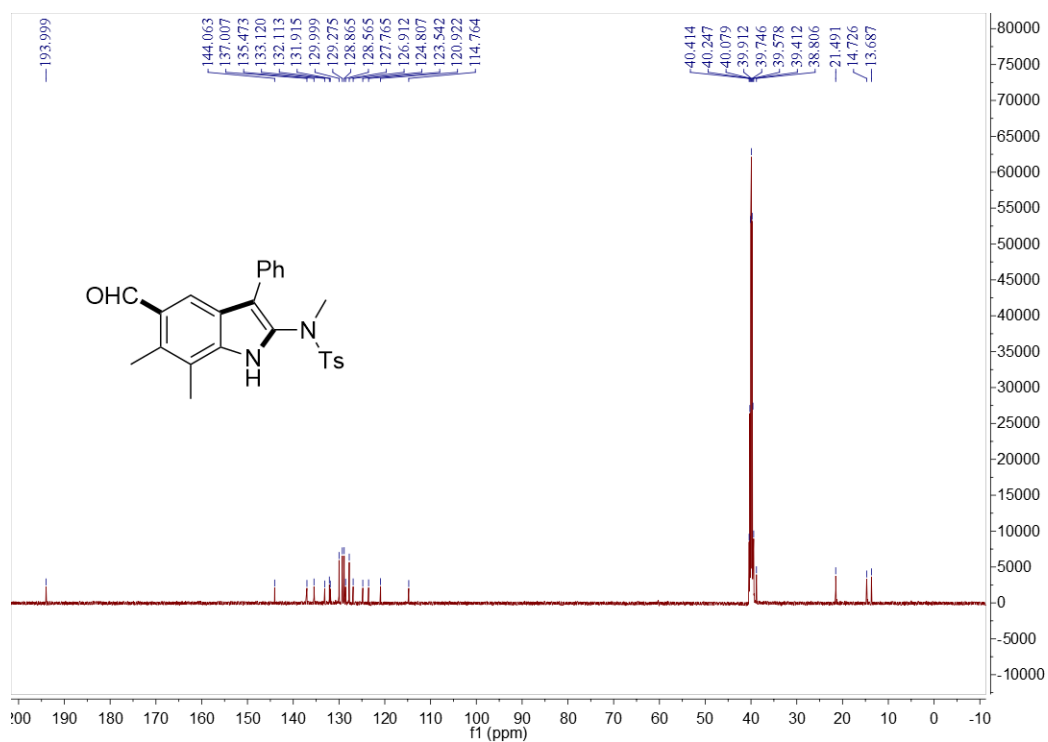



$^1\text{H}$  NMR of compound **4b** in  $\text{DMSO-}d_6$

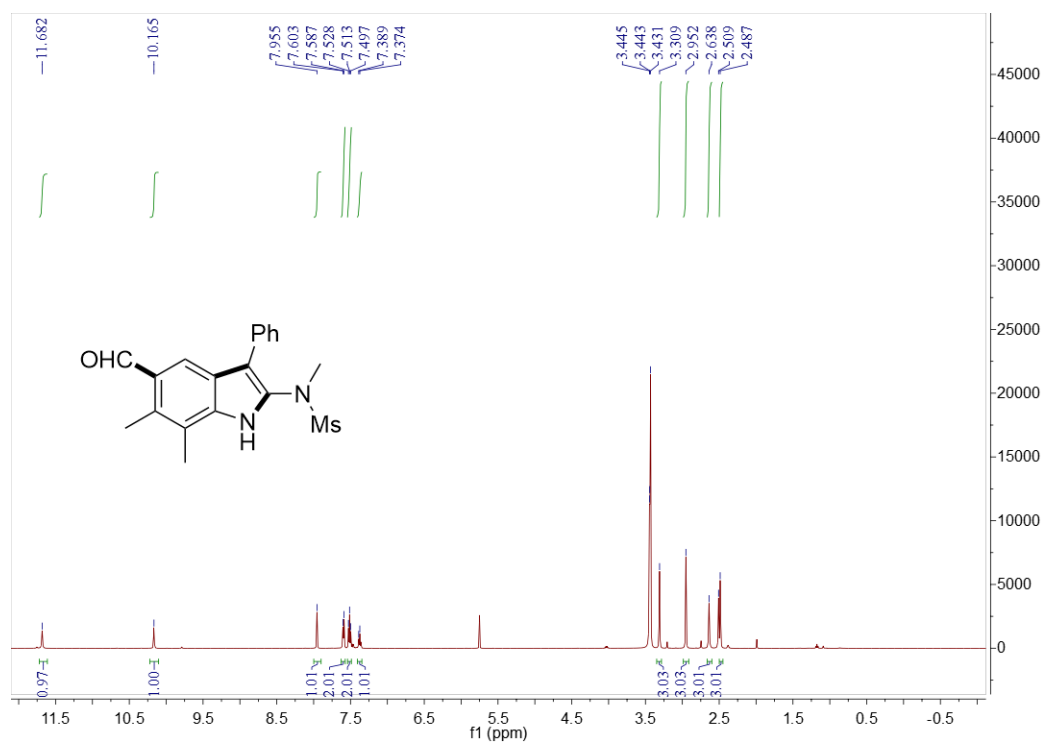

$^{13}\text{C}$  NMR of compound **4b** in  $\text{DMSO-}d_6$

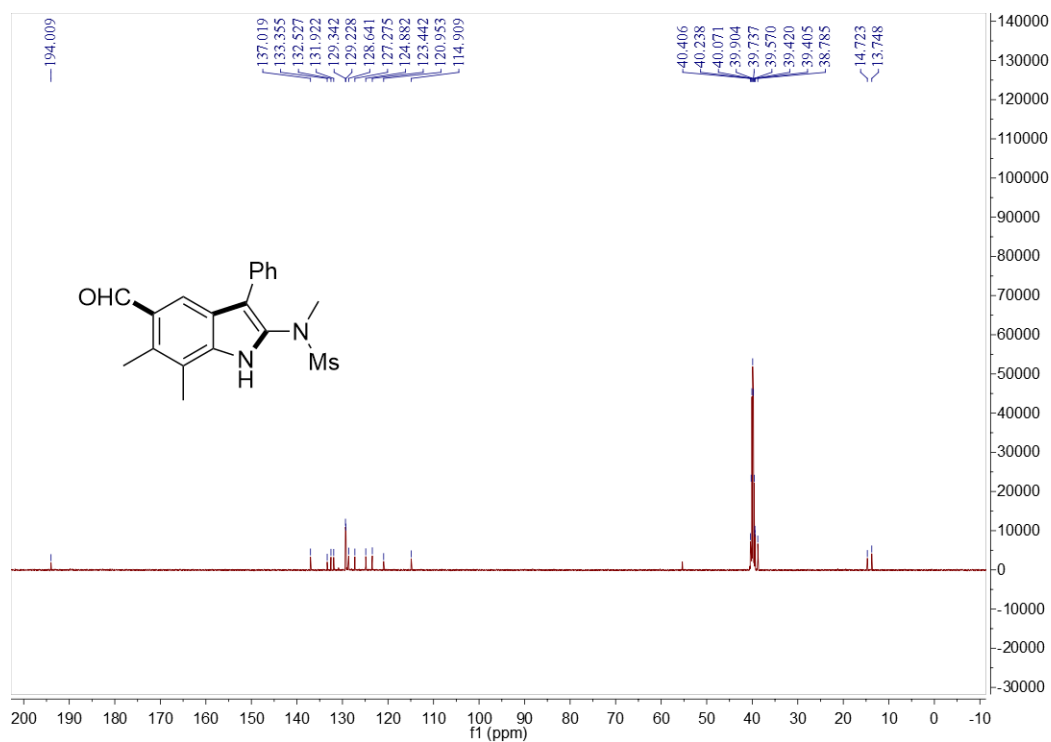

$^1\text{H}$  NMR of compound **4c** in  $\text{DMSO-}d_6$

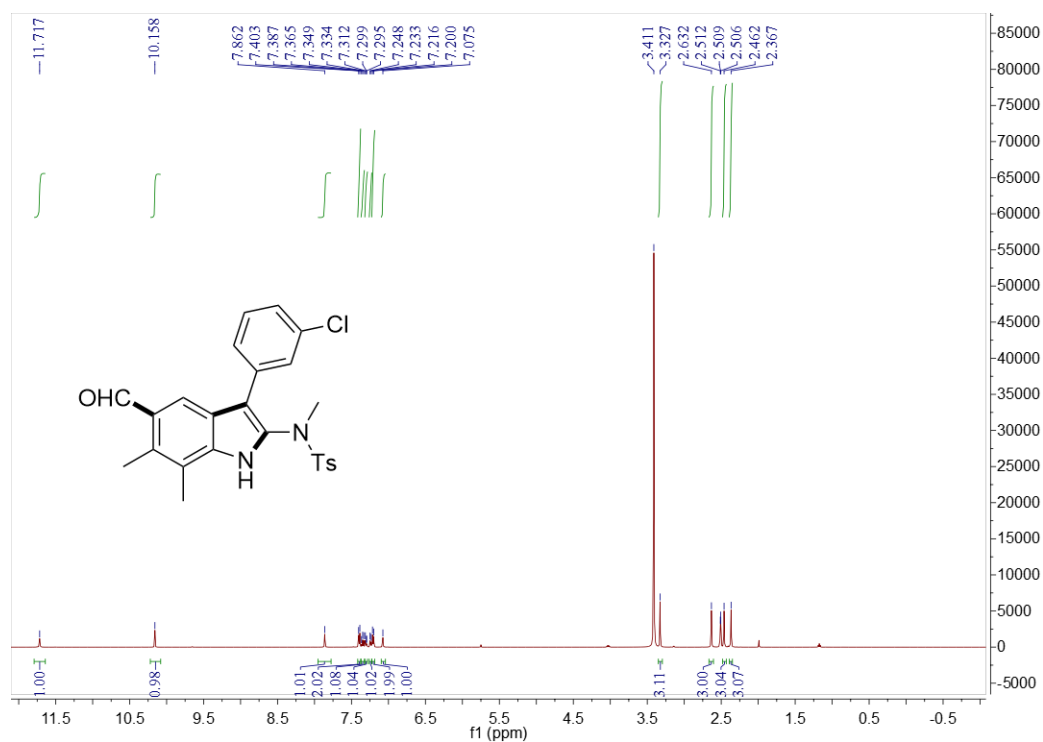

$^{13}\text{C}$  NMR of compound **4c** in  $\text{DMSO-}d_6$

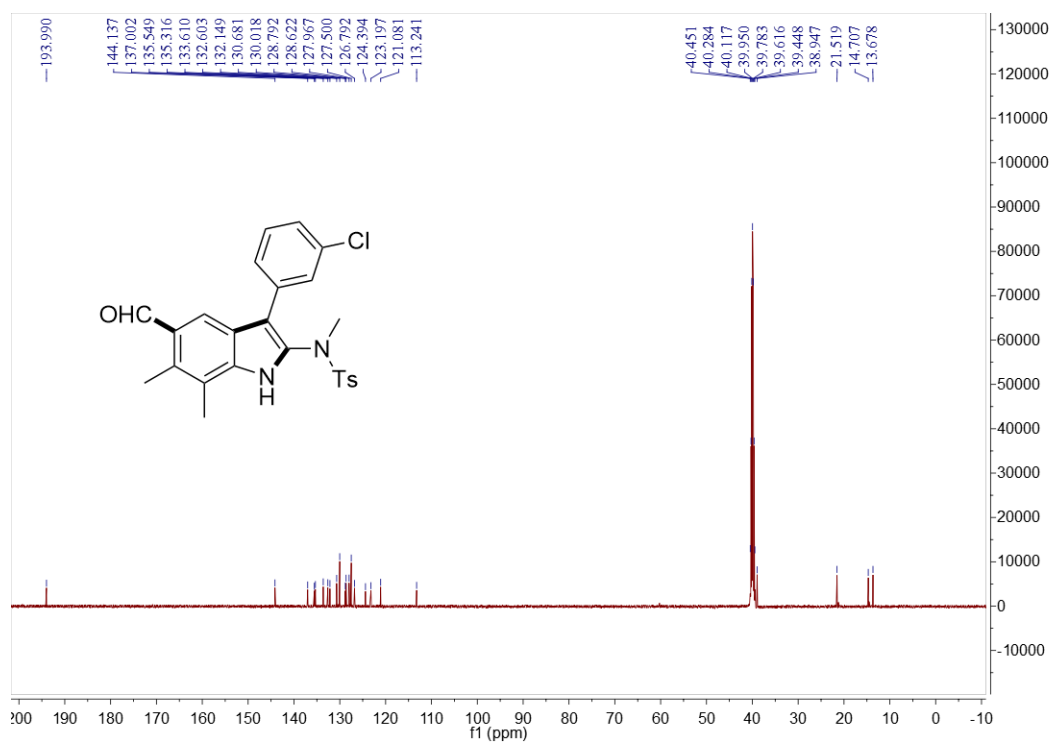

<sup>1</sup>H NMR of compound **4d** in CDCl<sub>3</sub>

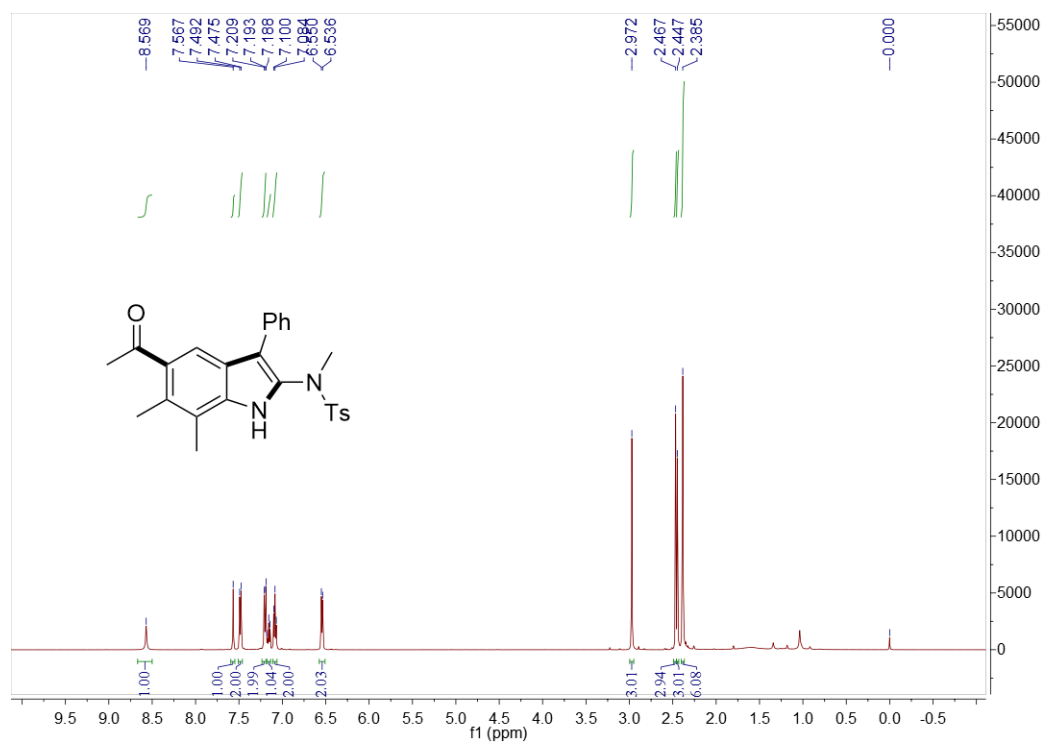

<sup>13</sup>C NMR of compound **4d** in CDCl<sub>3</sub>

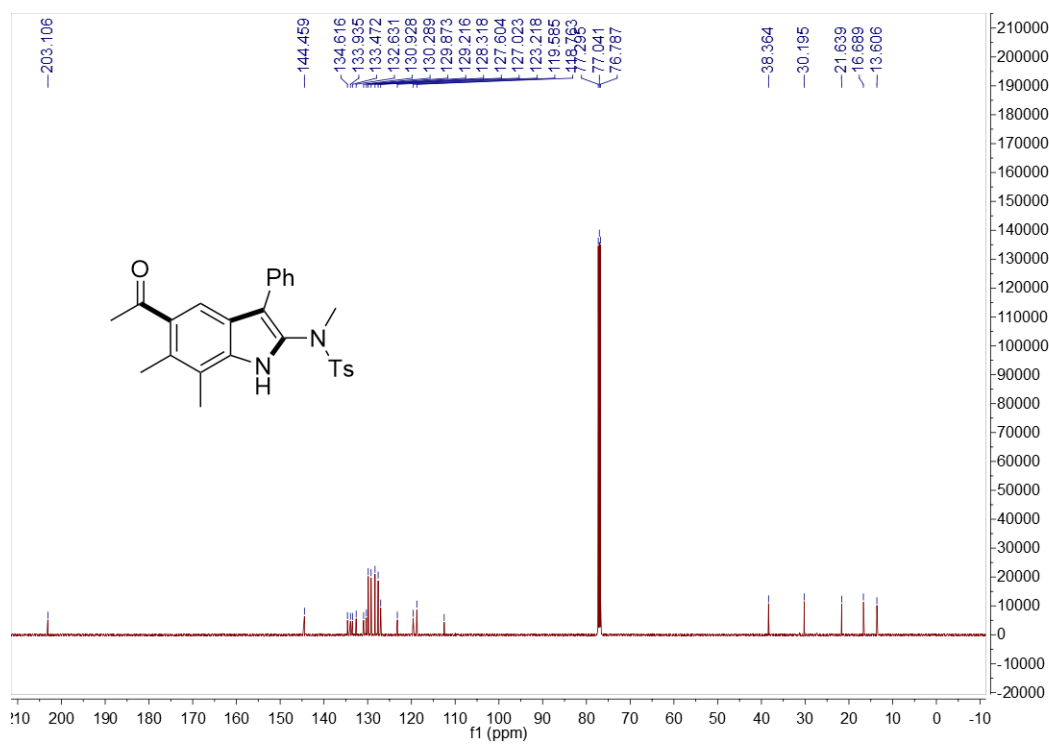

$^1\text{H}$  NMR of compound **4e** in  $\text{DMSO-}d_6$

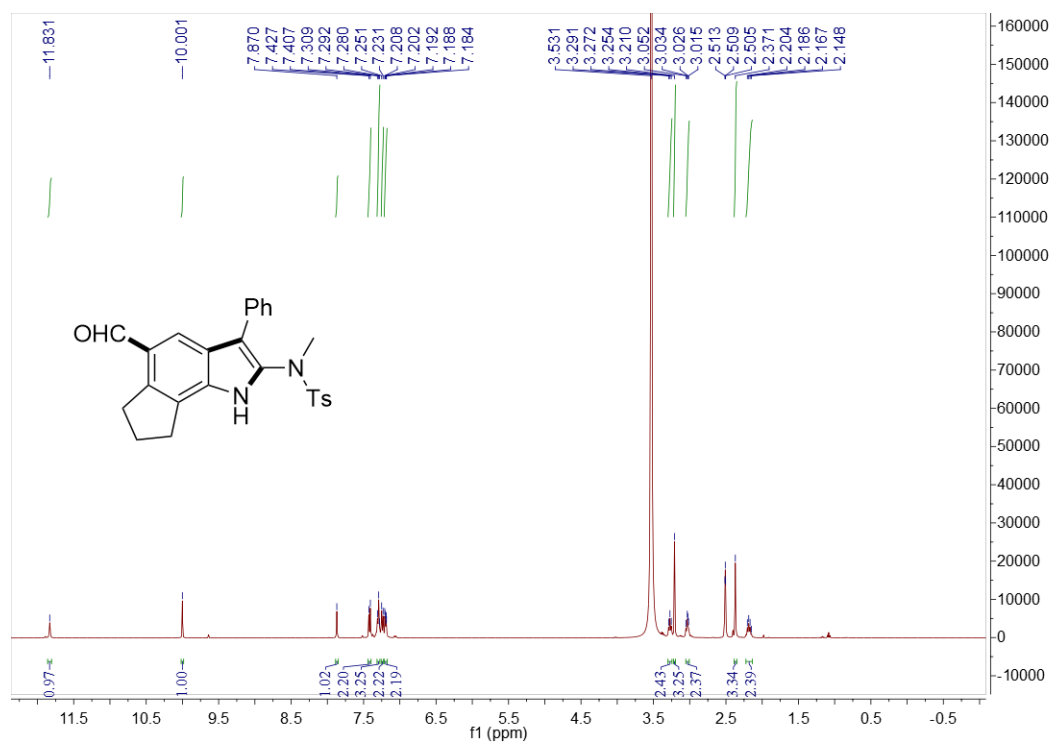

$^{13}\text{C}$  NMR of compound **4e** in  $\text{DMSO-}d_6$

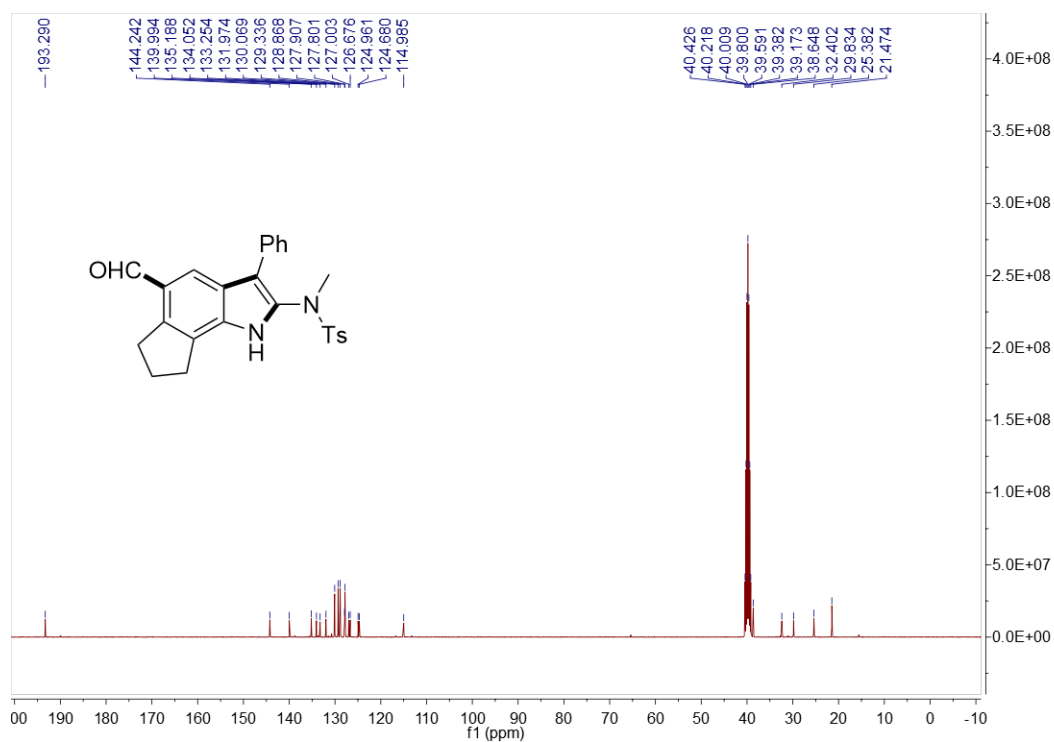

<sup>1</sup>H NMR of compound **5a** in CDCl<sub>3</sub>

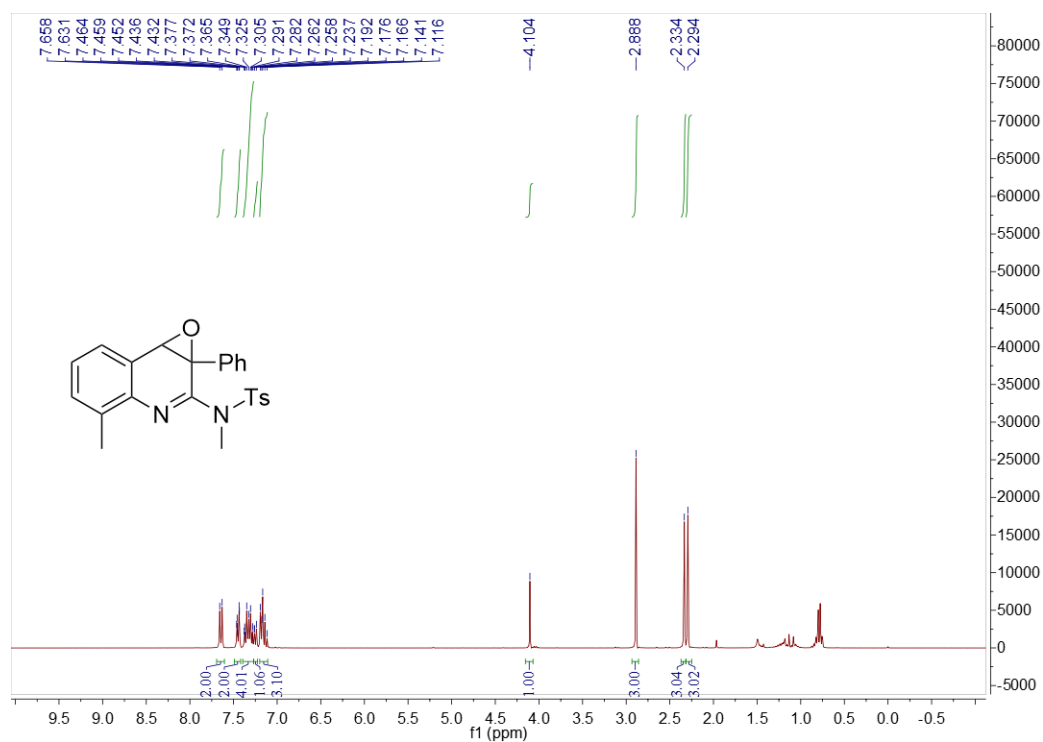

<sup>13</sup>C NMR of compound **5a** in CDCl<sub>3</sub>

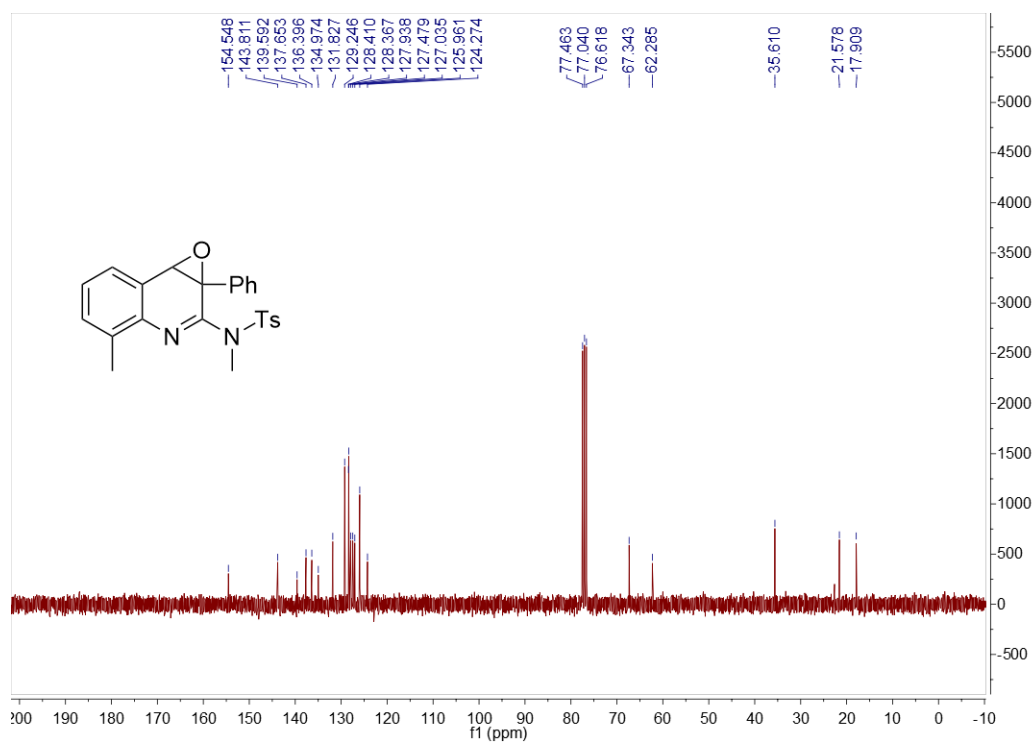

<sup>1</sup>H NMR of compound **5b** in CDCl<sub>3</sub>

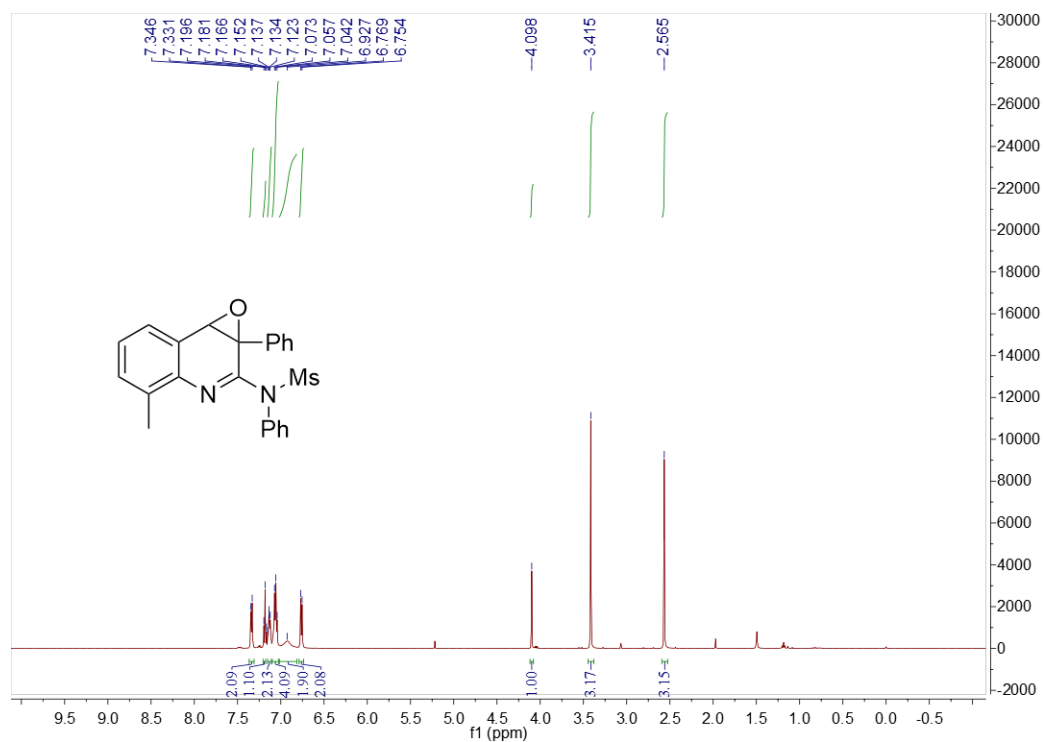

<sup>13</sup>C NMR of compound **5b** in CDCl<sub>3</sub>

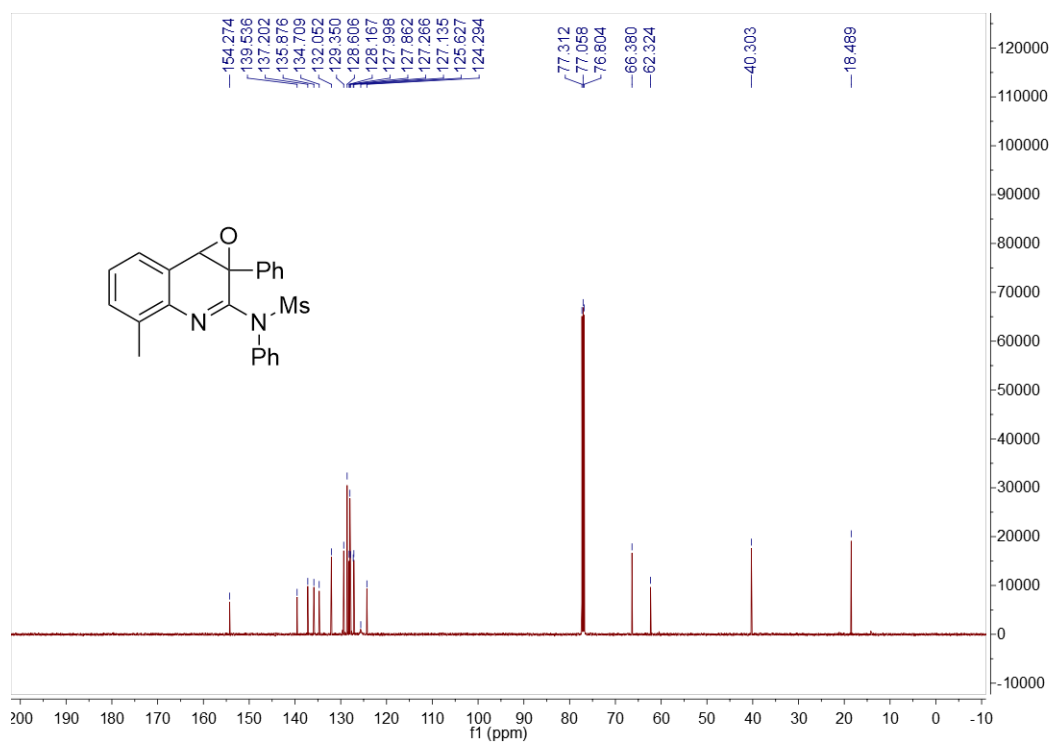

<sup>1</sup>H NMR of compound **5c** in CDCl<sub>3</sub>

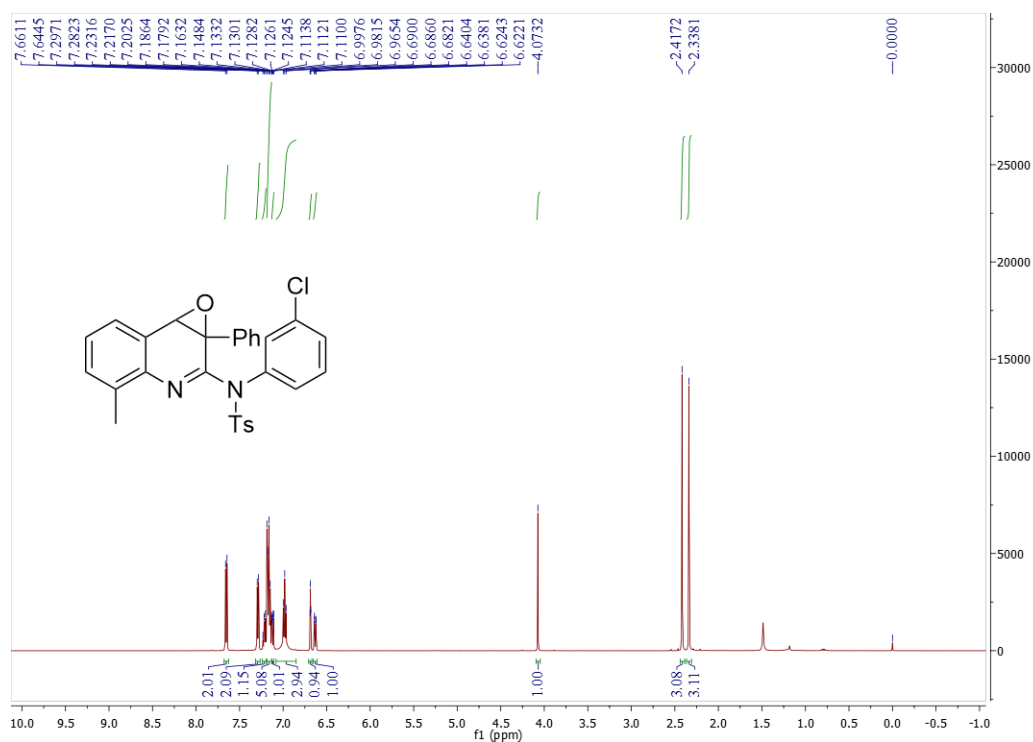

<sup>13</sup>C NMR of compound **5c** in CDCl<sub>3</sub>

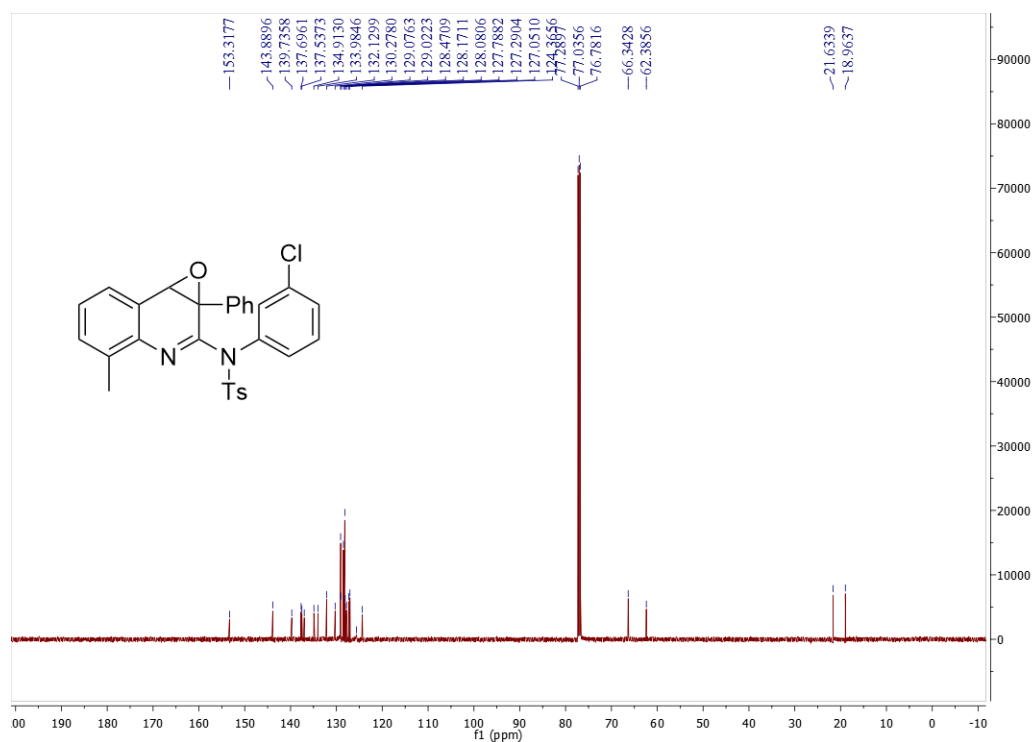

<sup>1</sup>H NMR of compound **5e** in CDCl<sub>3</sub>

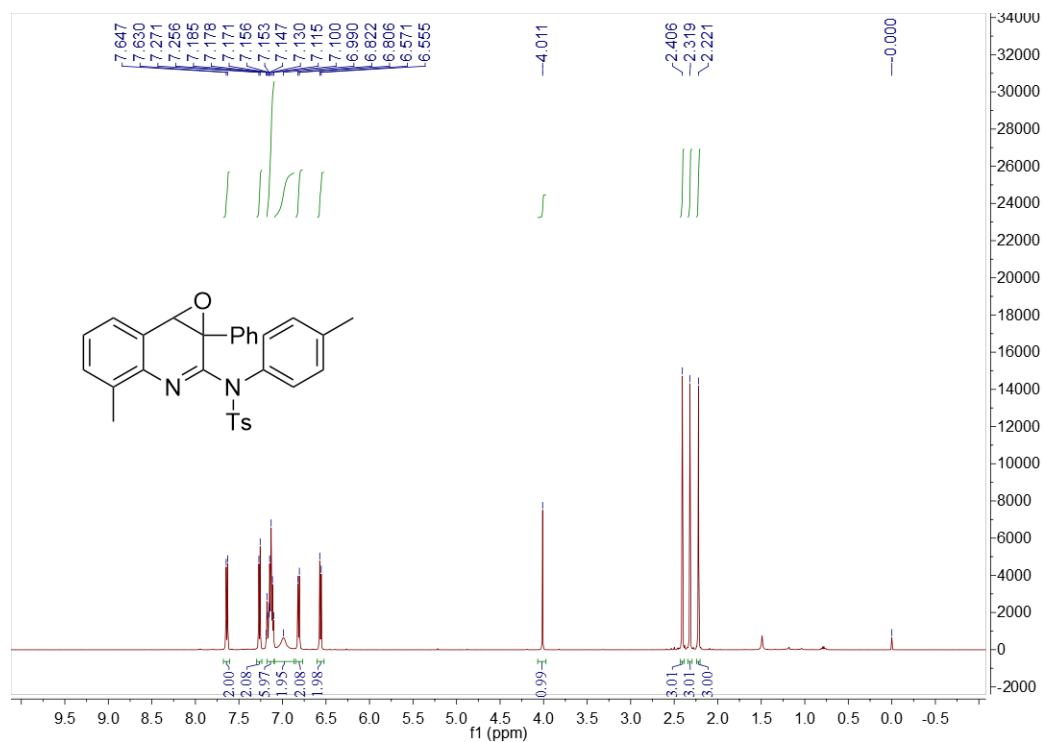

<sup>13</sup>C NMR of compound **5e** in CDCl<sub>3</sub>

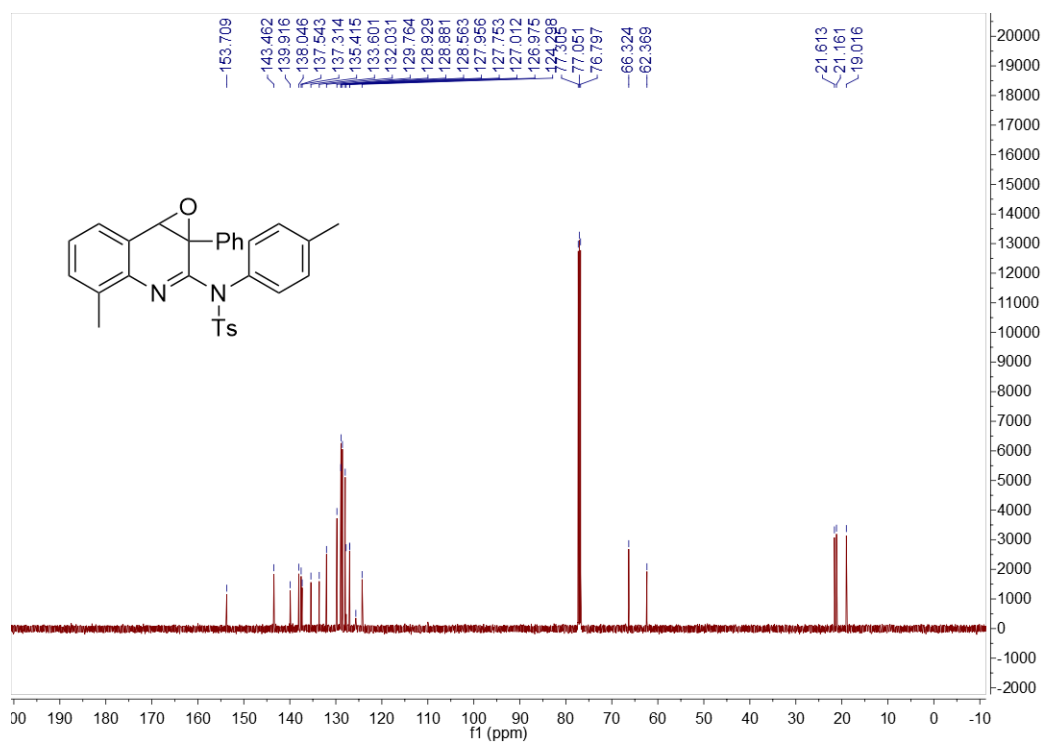



<sup>1</sup>H NMR of compound **5f** in CDCl<sub>3</sub>

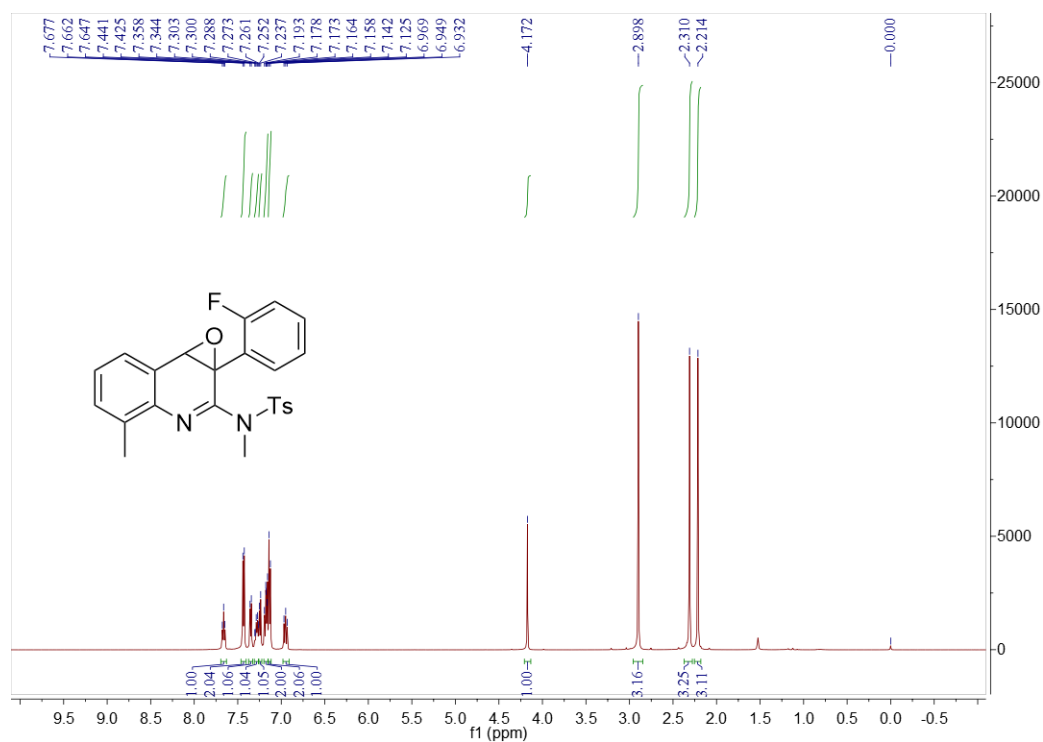

<sup>13</sup>C NMR of compound **5f** in CDCl<sub>3</sub>

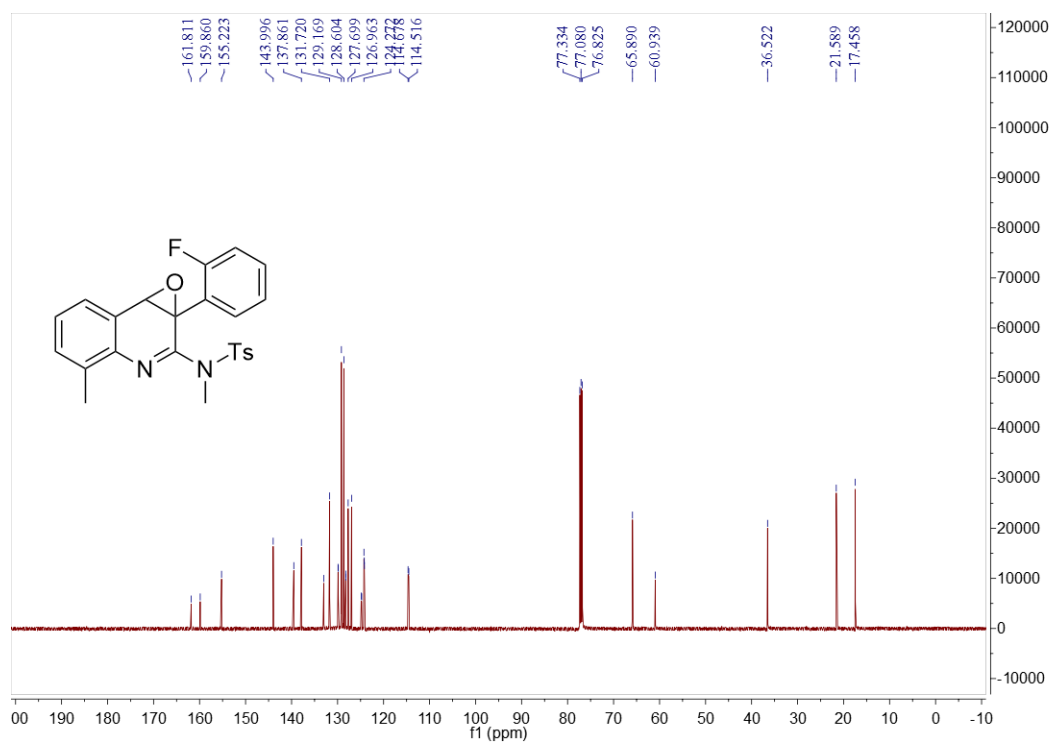

<sup>1</sup>H NMR of compound **5g** in CDCl<sub>3</sub>

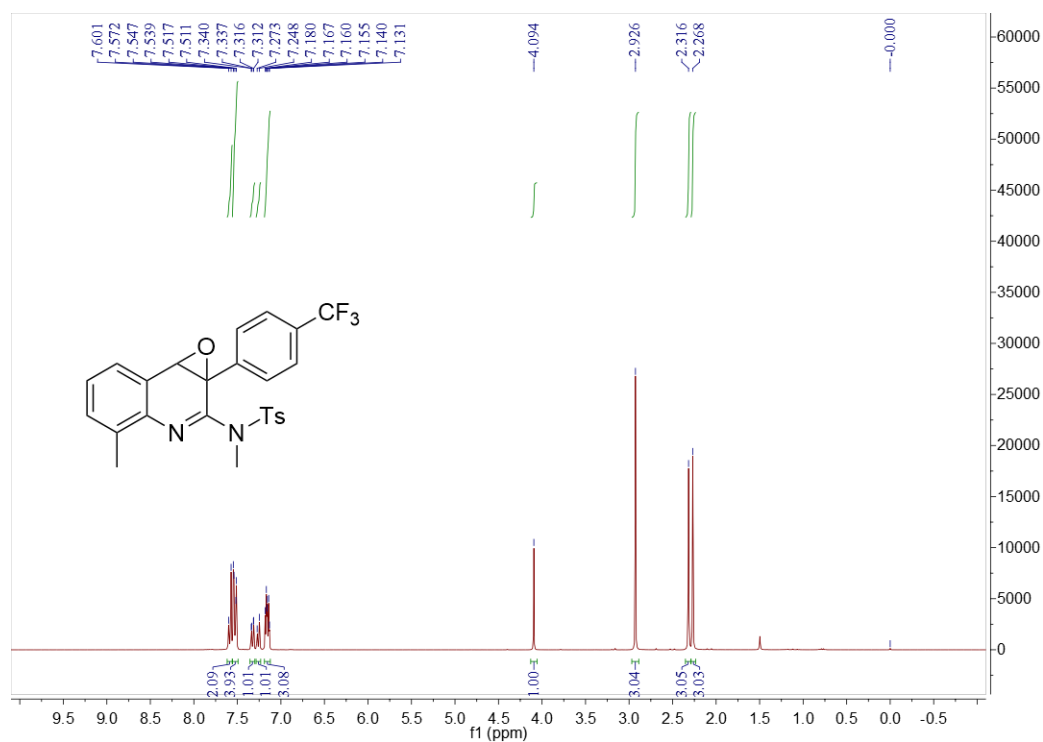

<sup>13</sup>C NMR of compound **5g** in CDCl<sub>3</sub>

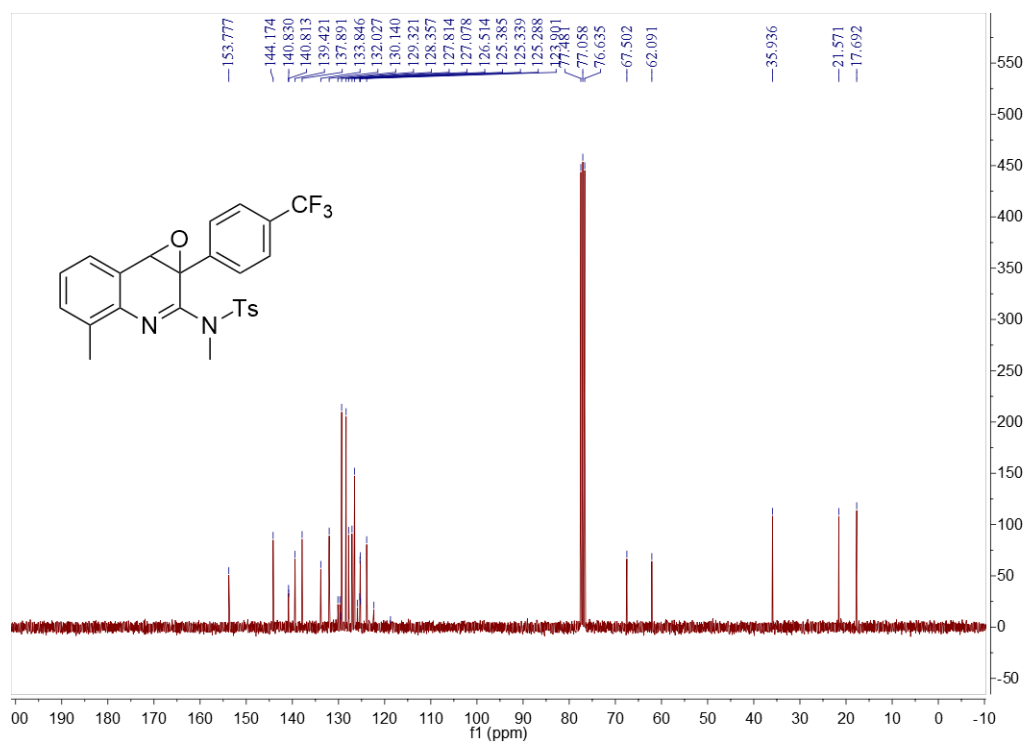

<sup>1</sup>H NMR of compound **5h** in CDCl<sub>3</sub>

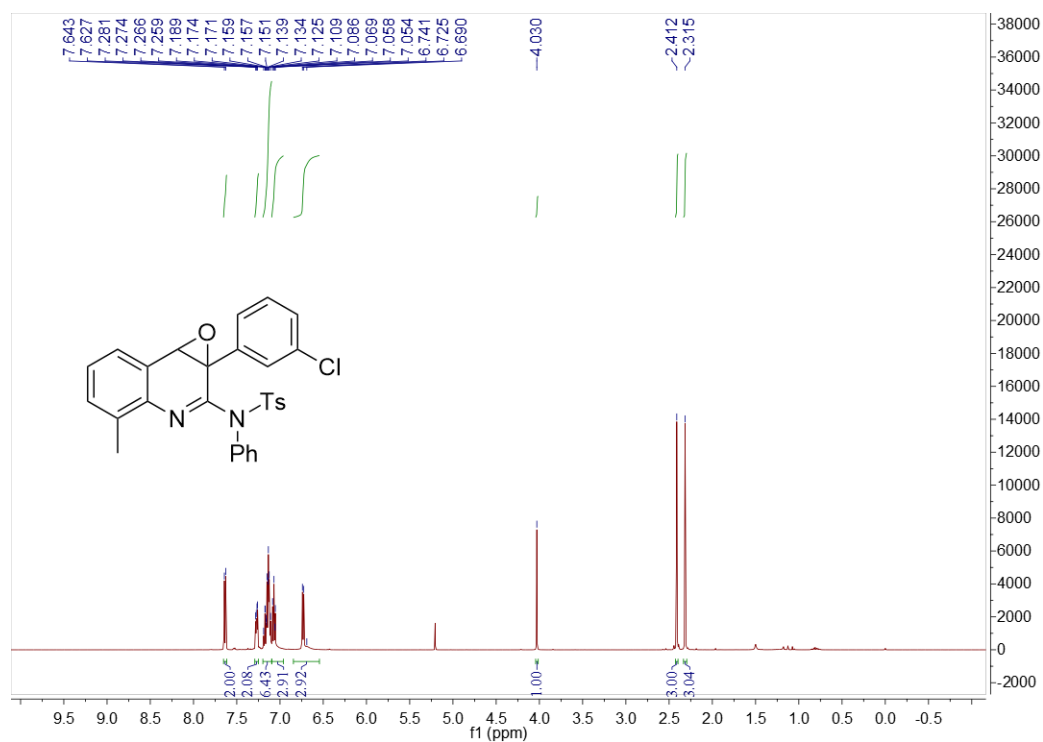

<sup>13</sup>C NMR of compound **5h** in CDCl<sub>3</sub>

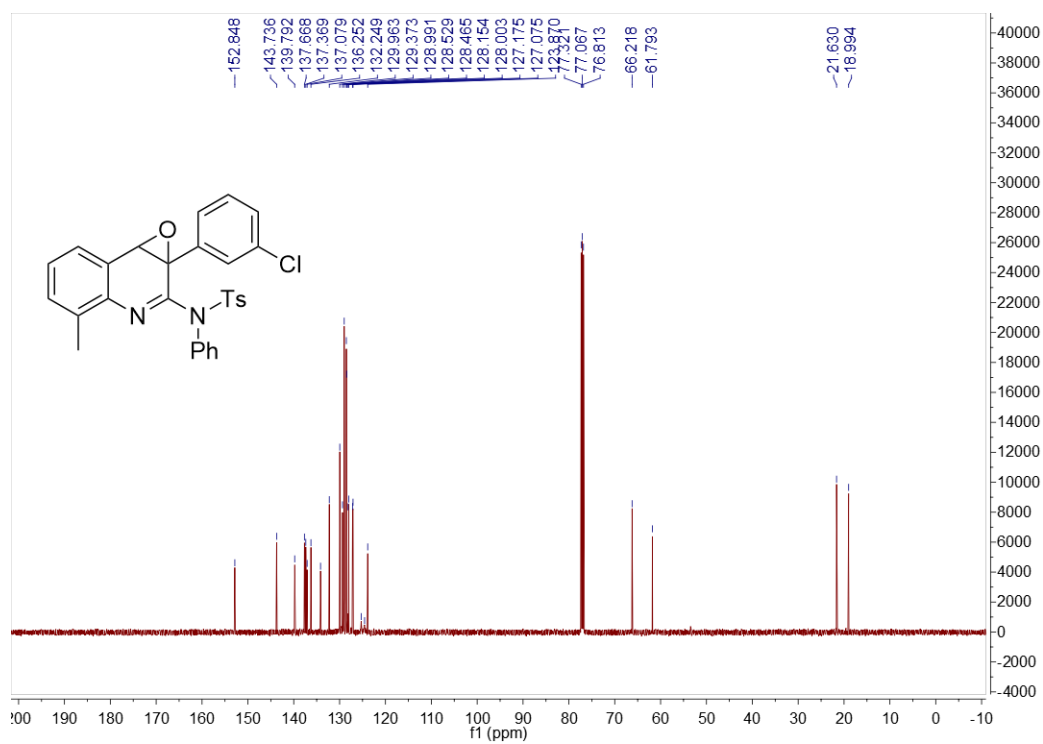

<sup>1</sup>H NMR of compound **5i** in CDCl<sub>3</sub>

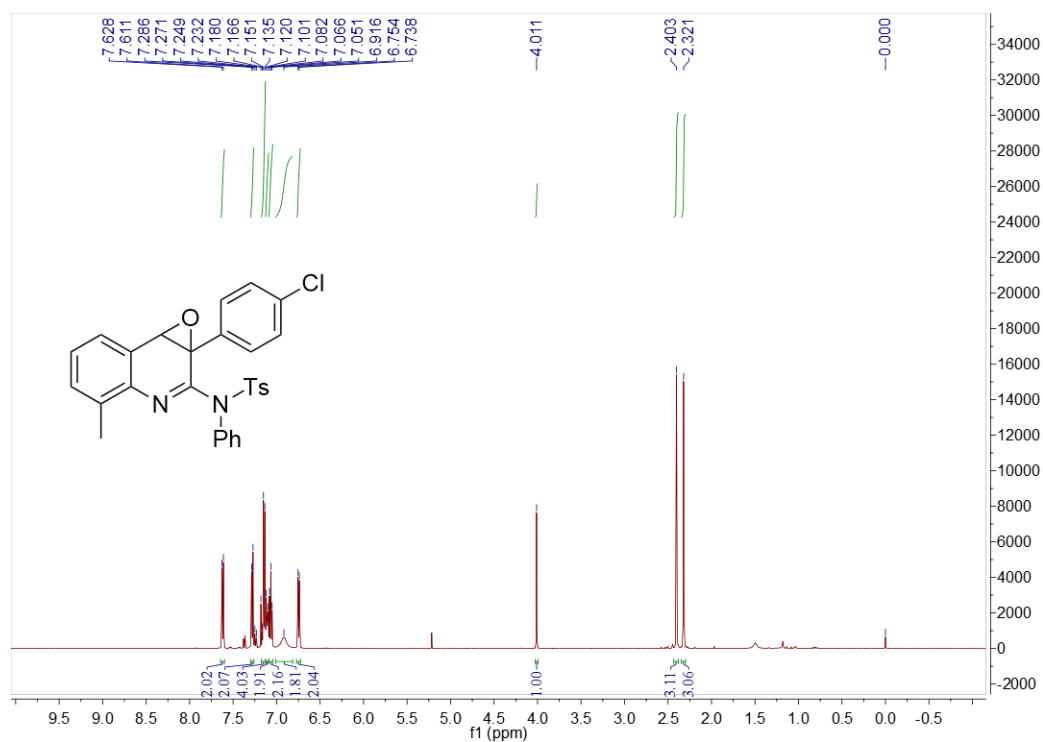

<sup>13</sup>C NMR of compound **5i** in CDCl<sub>3</sub>

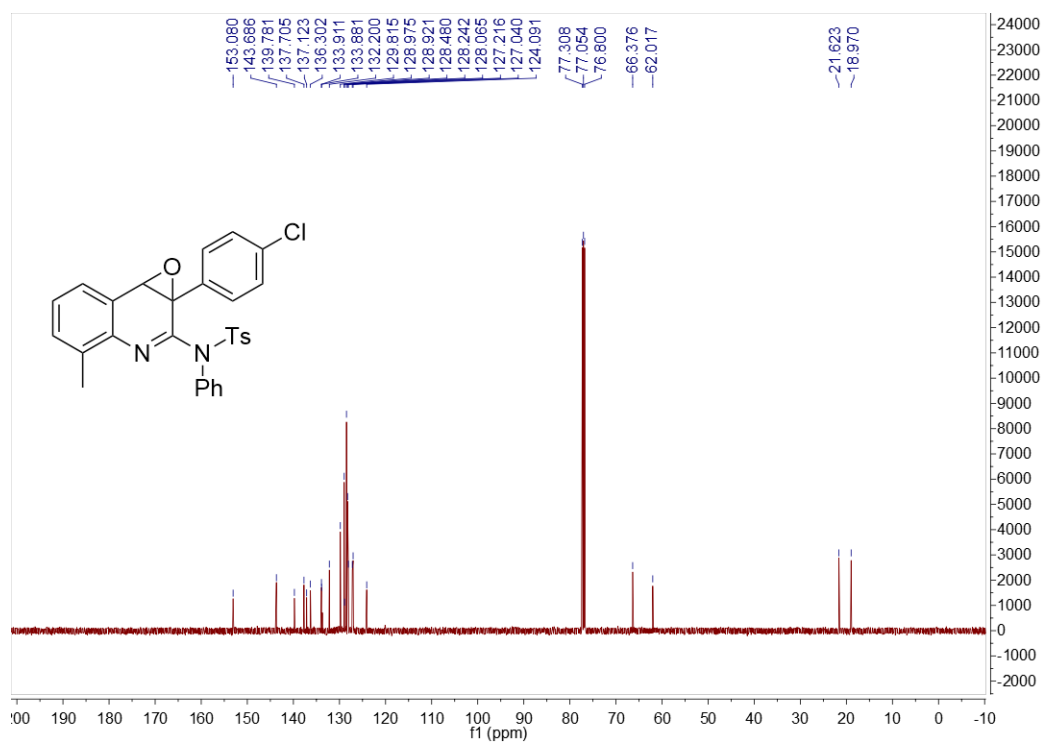

<sup>1</sup>H NMR of compound **5j** in CDCl<sub>3</sub>

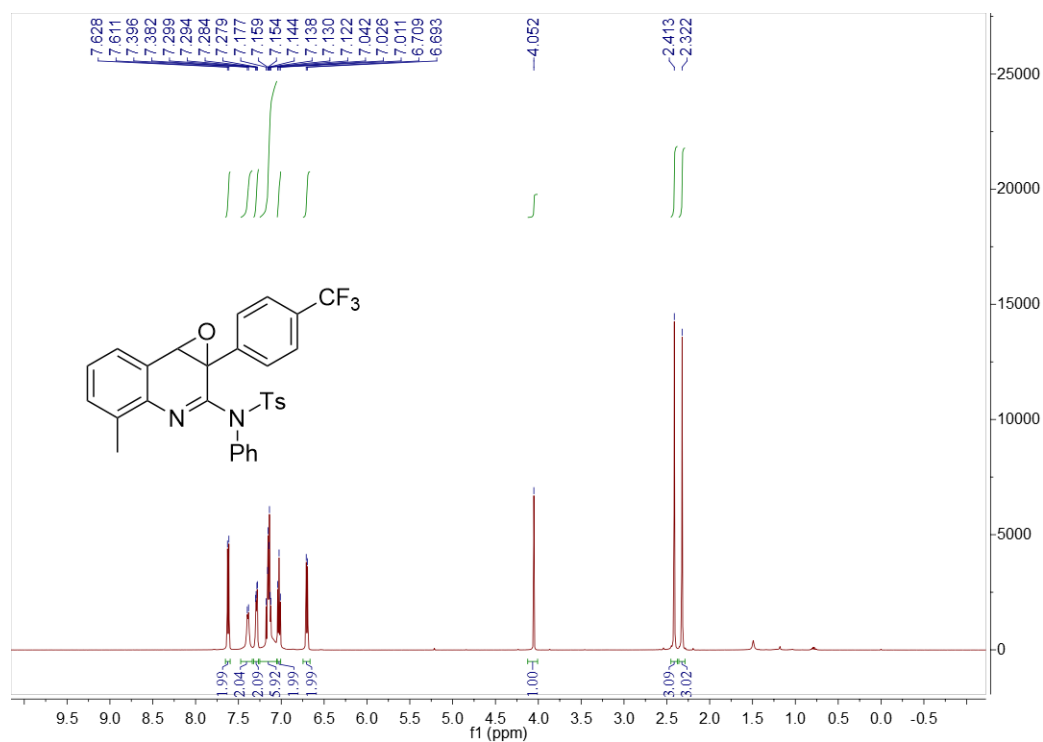

<sup>13</sup>C NMR of compound **5j** in CDCl<sub>3</sub>

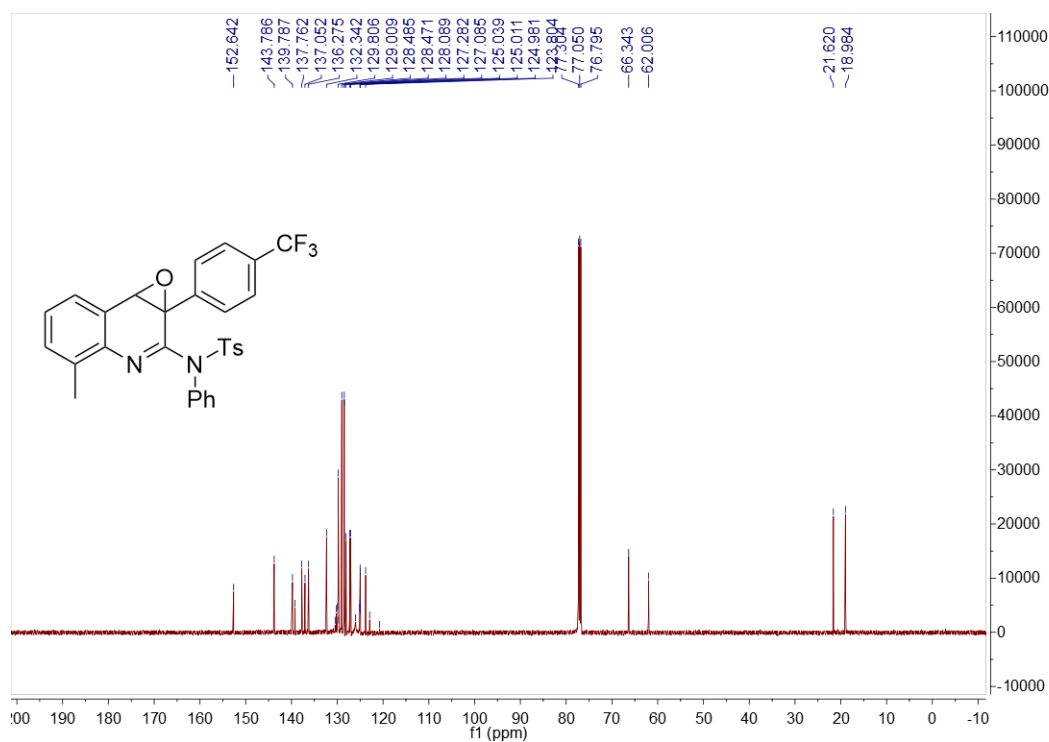

<sup>1</sup>H NMR of compound **5k** in CDCl<sub>3</sub>

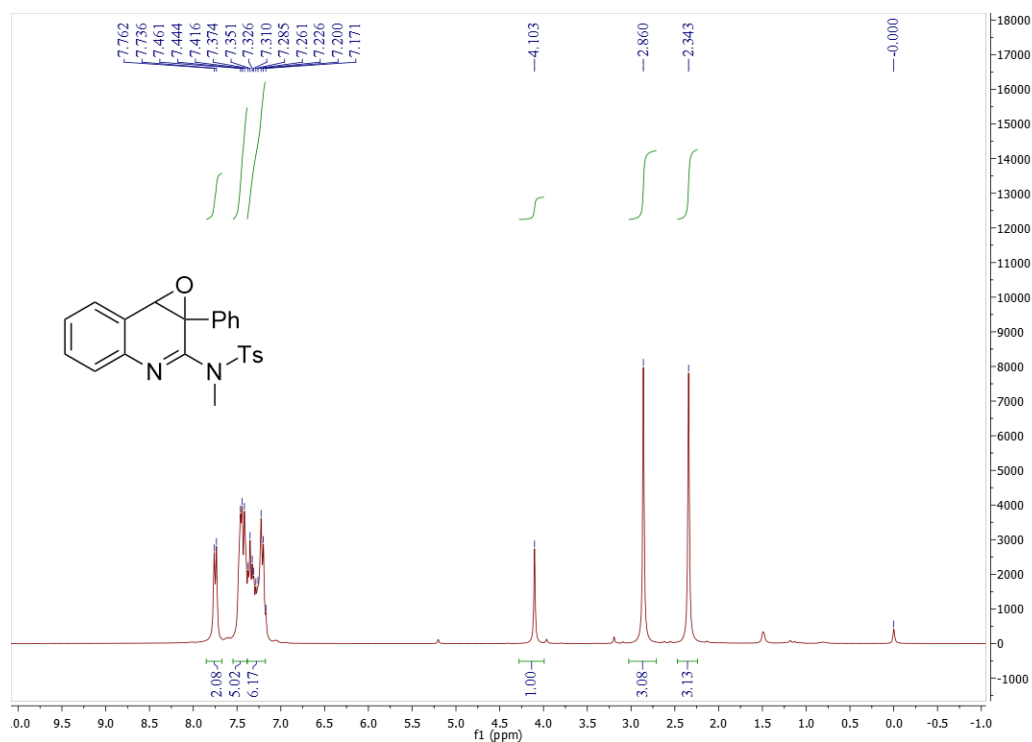

<sup>13</sup>C NMR of compound **5k** in CDCl<sub>3</sub>

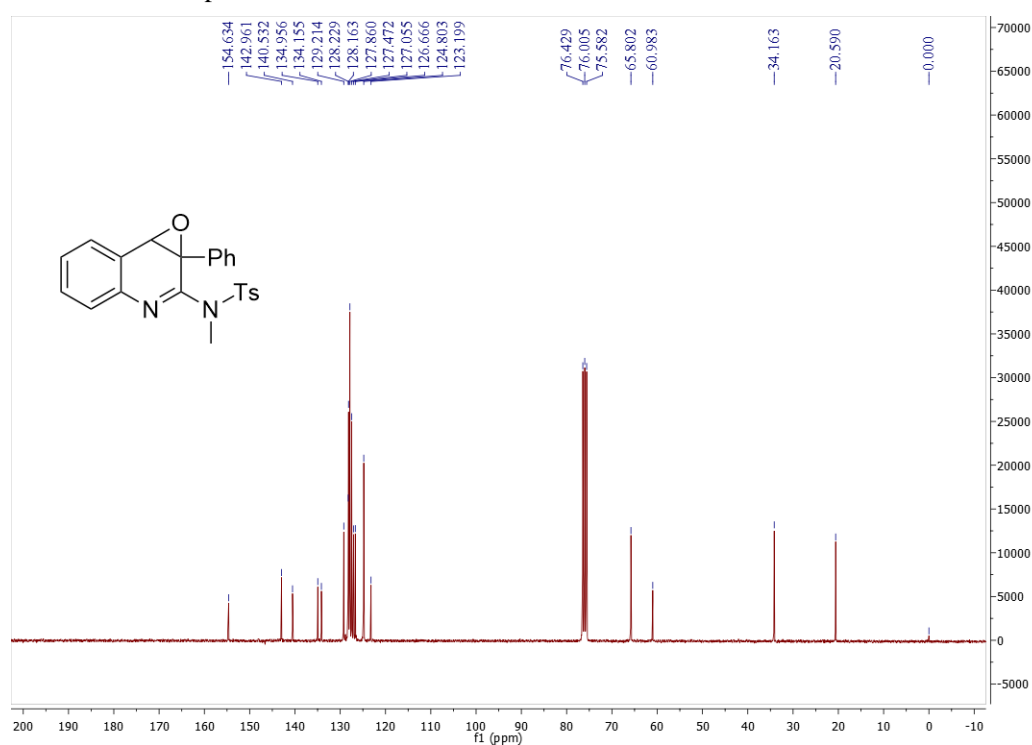

<sup>1</sup>H NMR of compound **51** in CDCl<sub>3</sub>

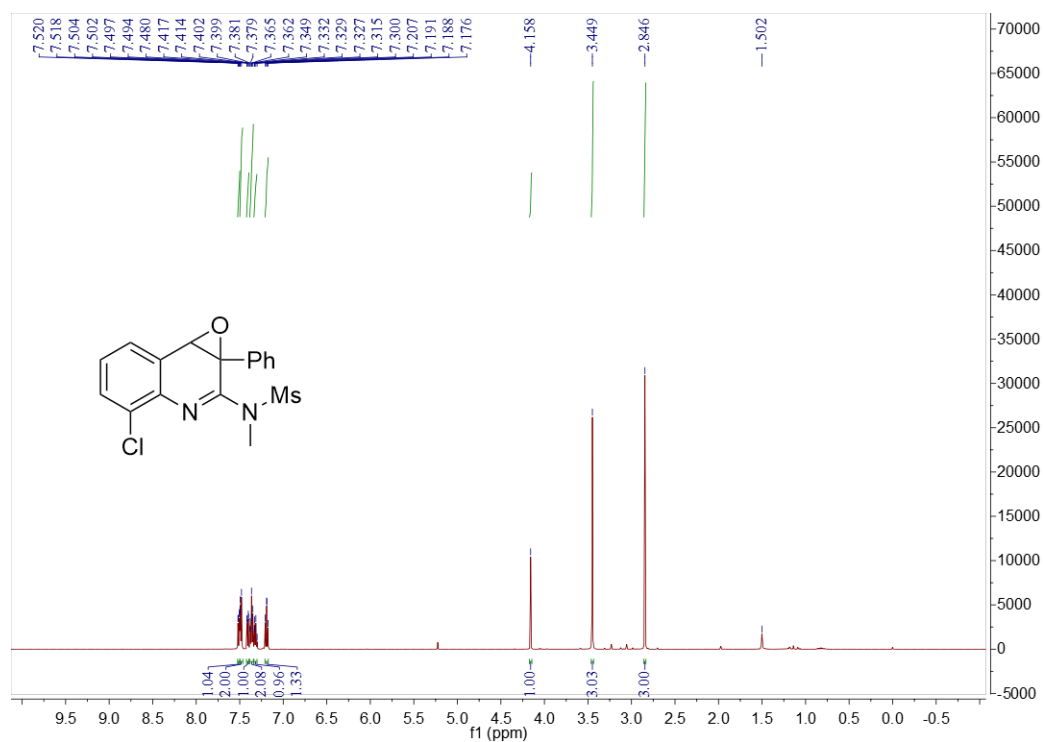

<sup>13</sup>C NMR of compound **51** in CDCl<sub>3</sub>

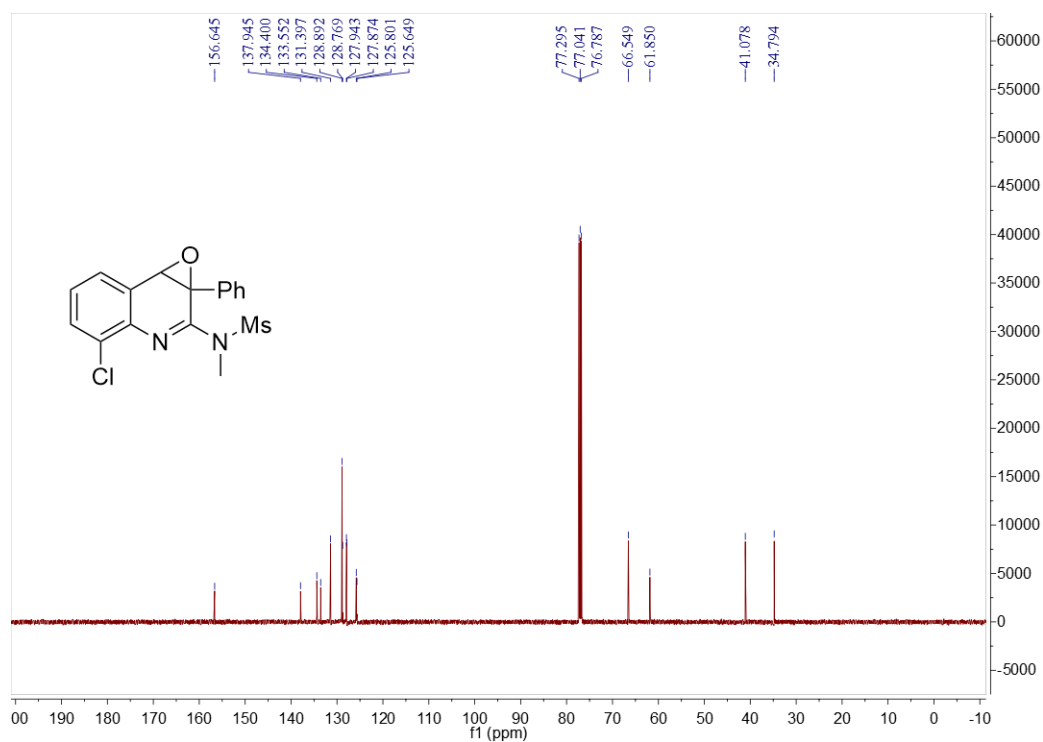

<sup>1</sup>H NMR of compound **5m** in CDCl<sub>3</sub>

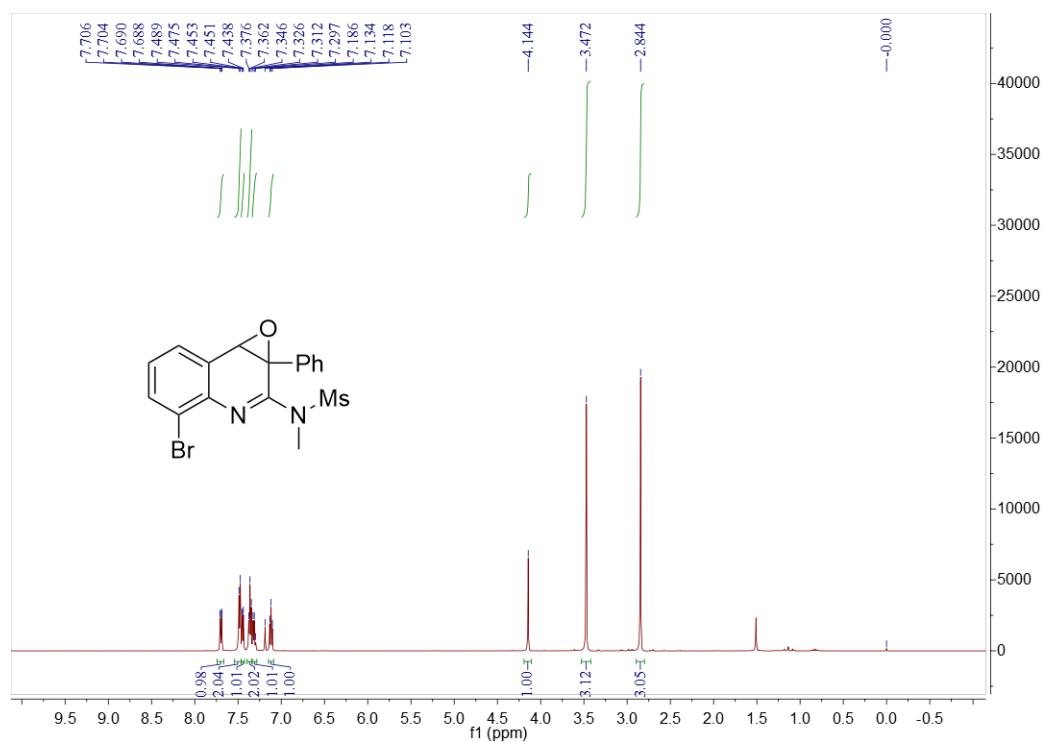

<sup>13</sup>C NMR of compound **5m** in CDCl<sub>3</sub>

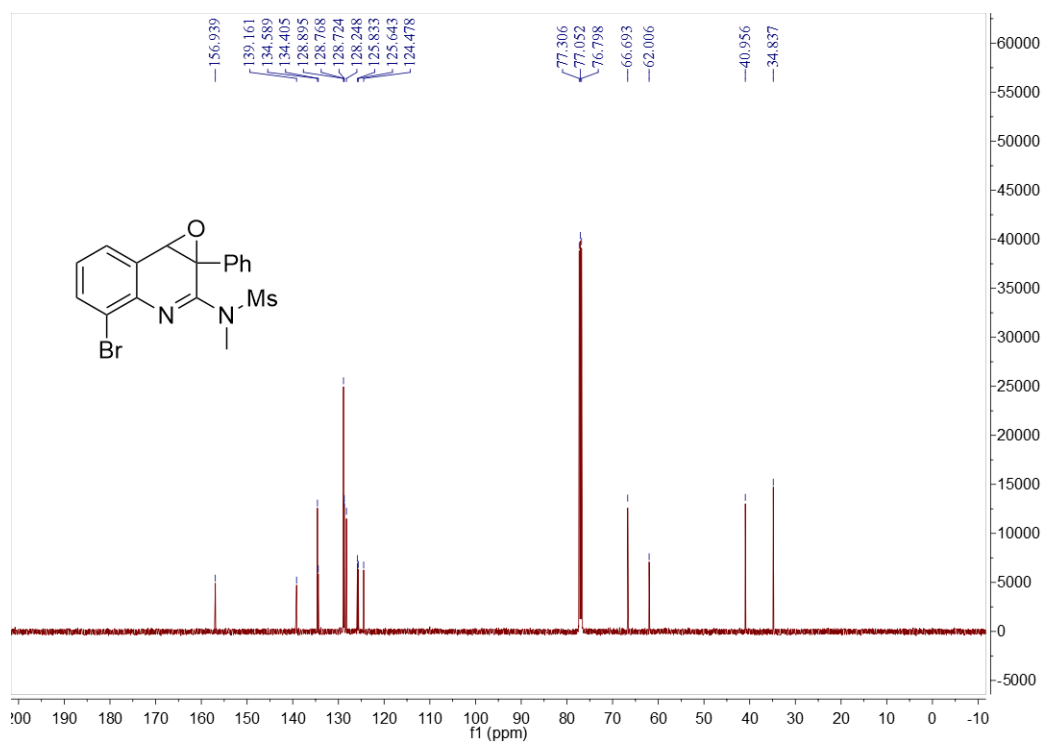



$^1\text{H}$  NMR of compound **6a** in  $\text{CDCl}_3$

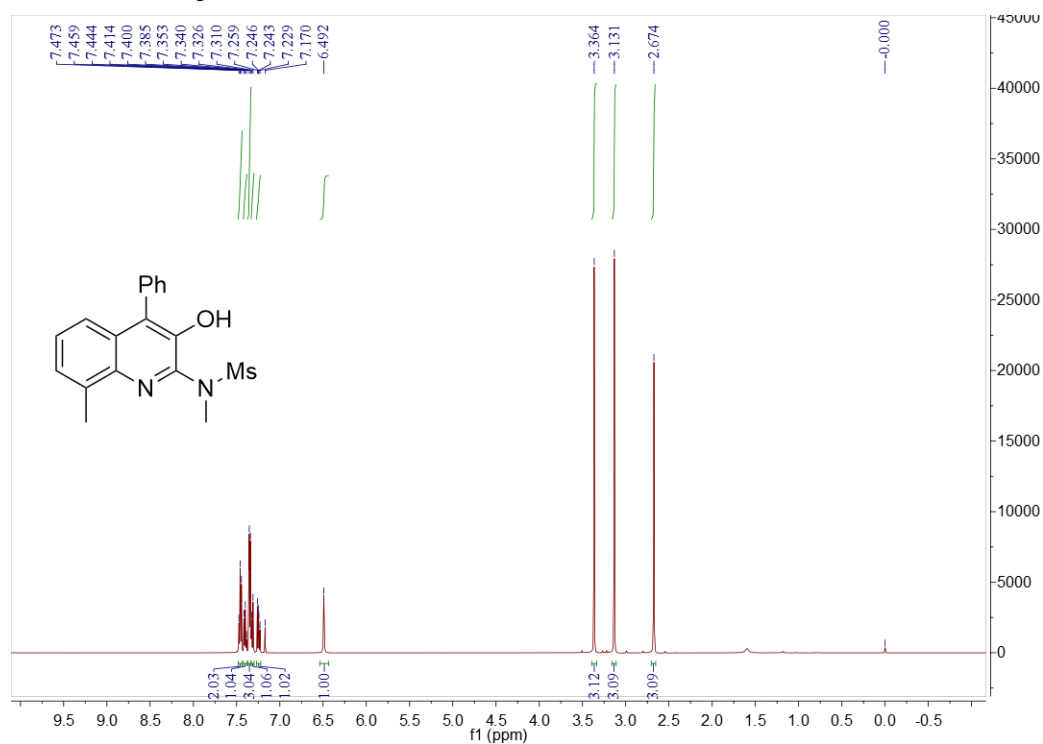

$^{13}\text{C}$  NMR of compound **6a** in  $\text{CDCl}_3$

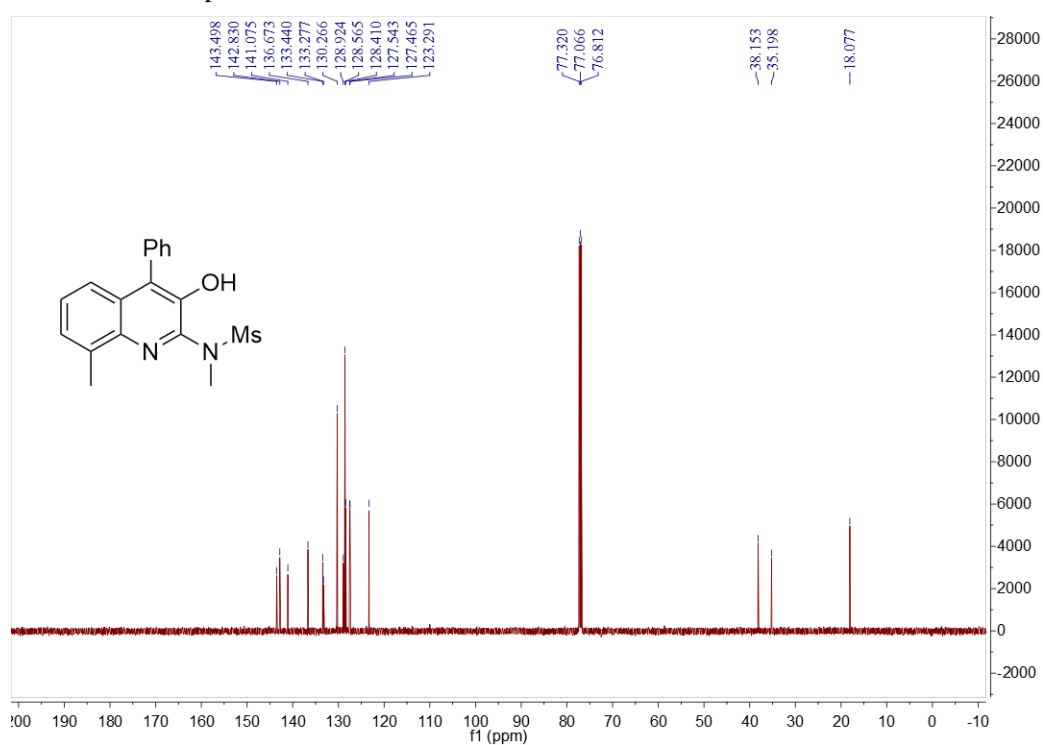

$^1\text{H}$  NMR of compound **6b** in  $\text{CDCl}_3$

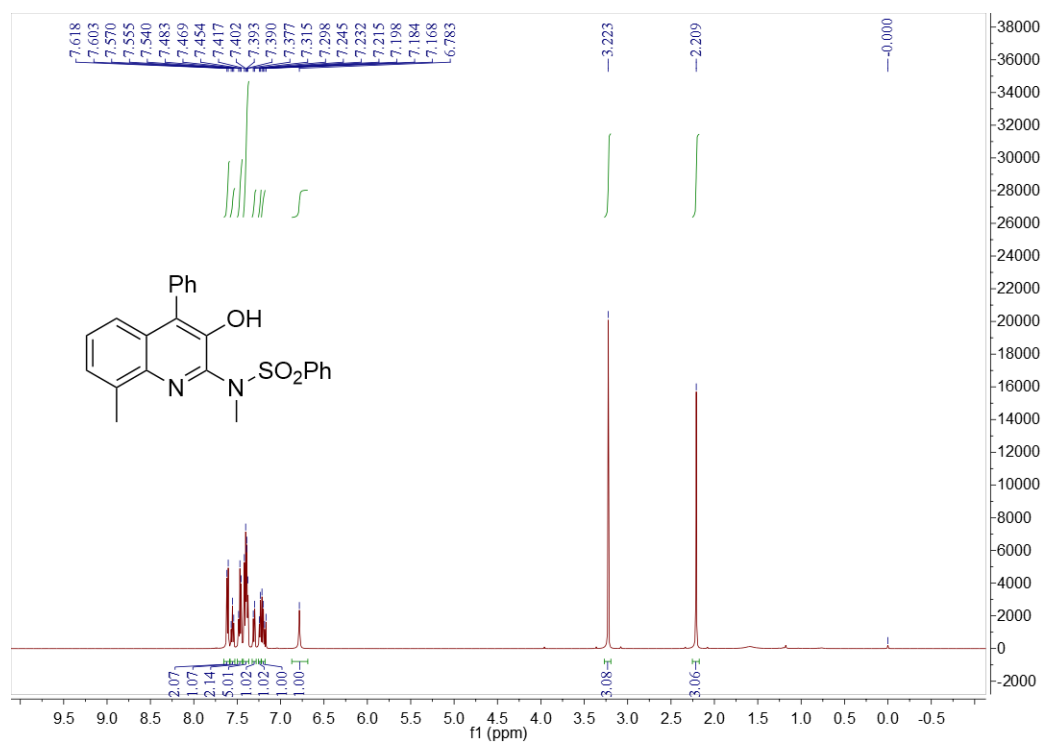

$^{13}\text{C}$  NMR of compound **6b** in  $\text{CDCl}_3$

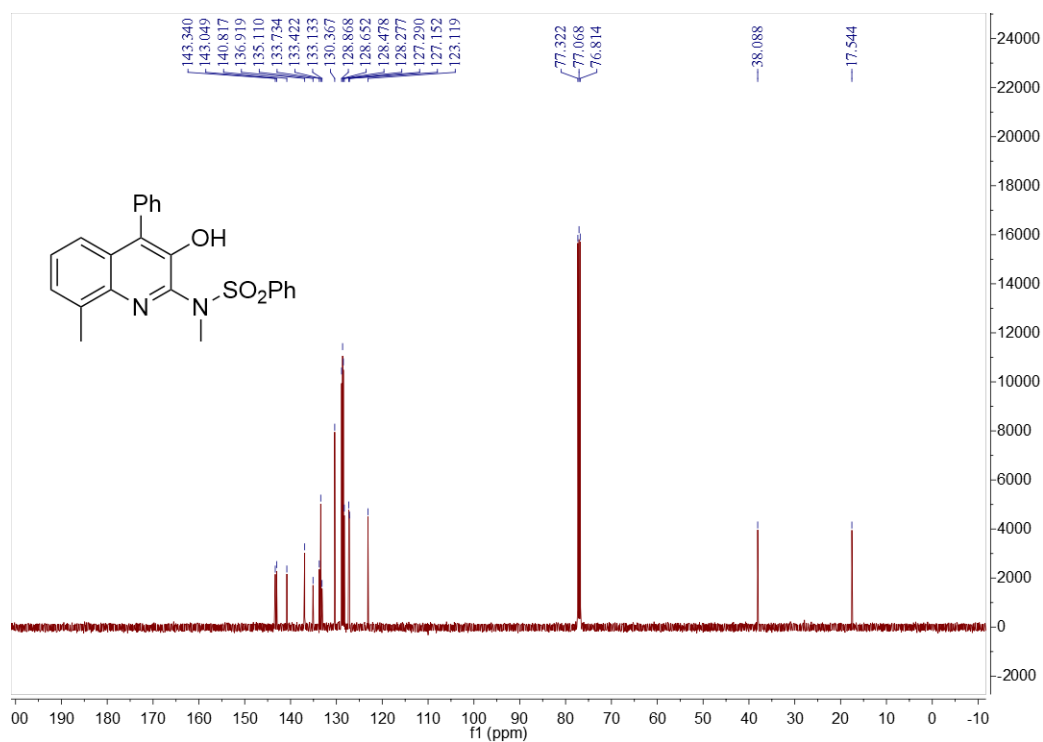

<sup>1</sup>H NMR of compound **6c** in CDCl<sub>3</sub>

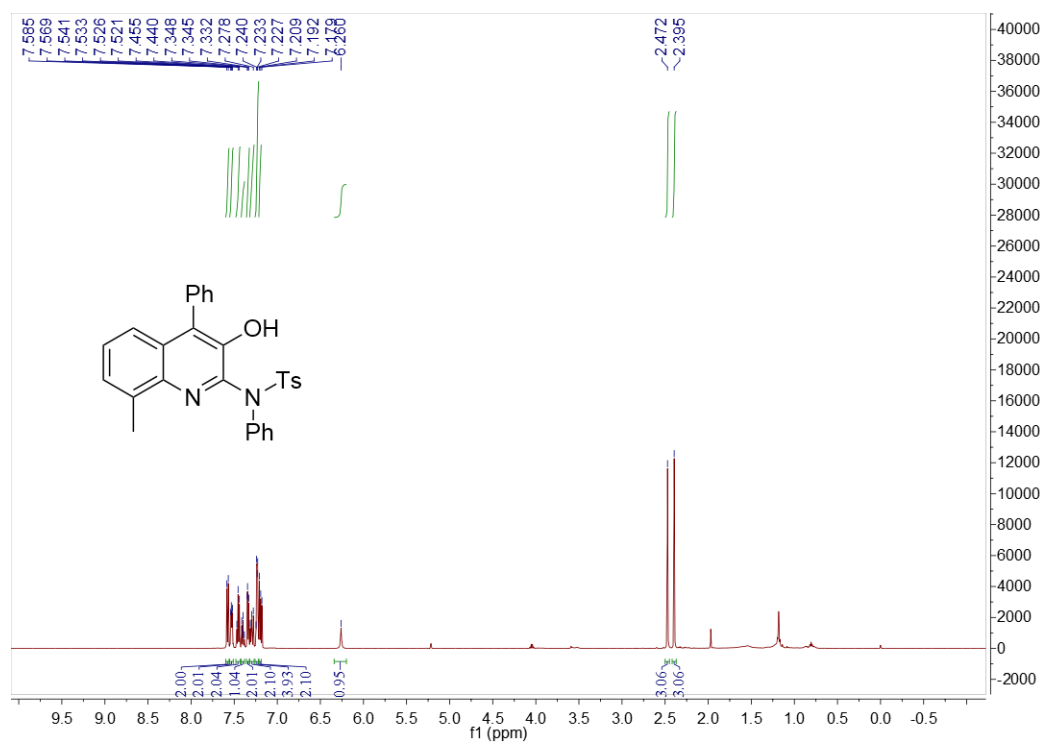

<sup>13</sup>C NMR of compound **6c** in CDCl<sub>3</sub>

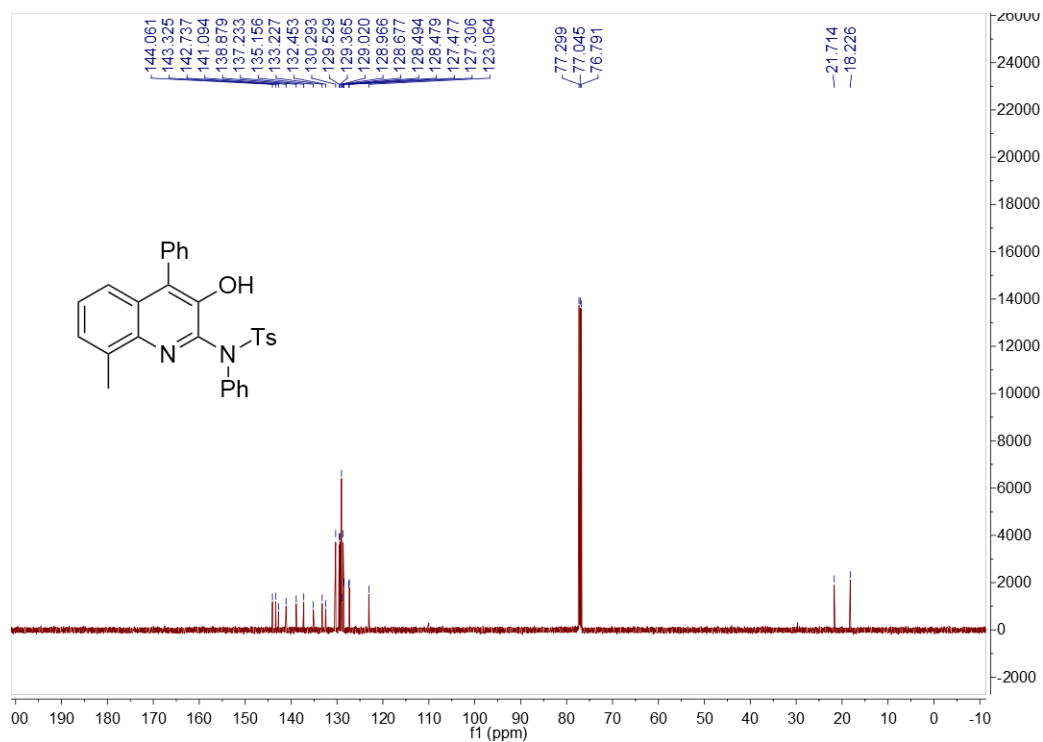

<sup>1</sup>H NMR of compound **6d** in CDCl<sub>3</sub>

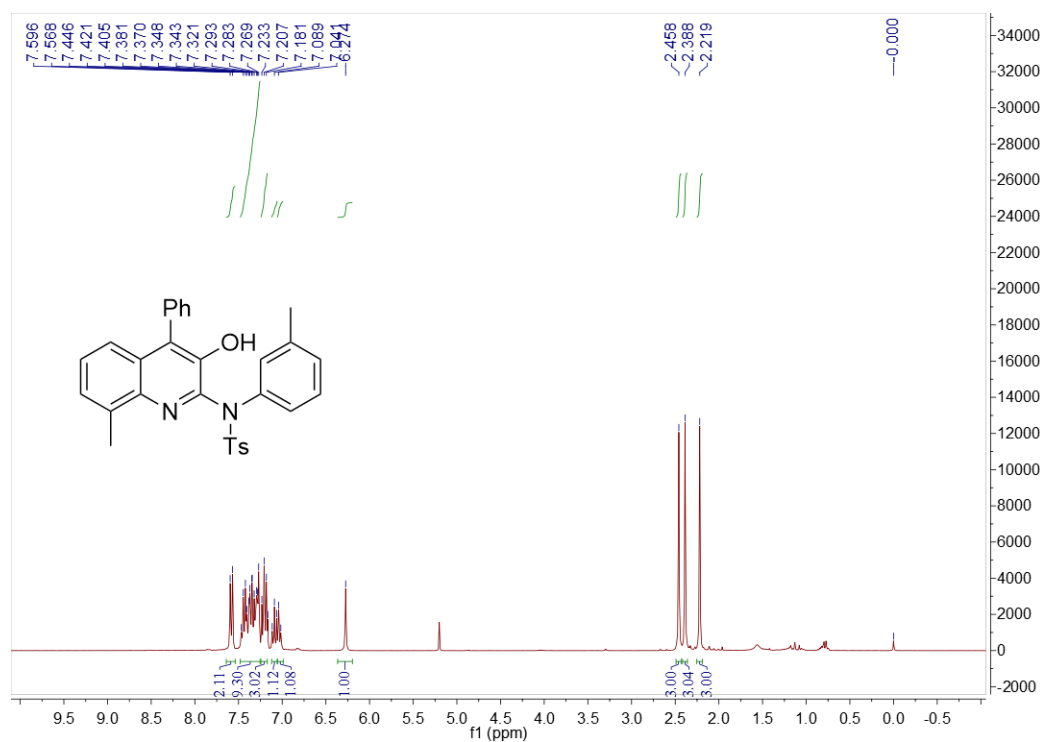

<sup>13</sup>C NMR of compound **6d** in CDCl<sub>3</sub>

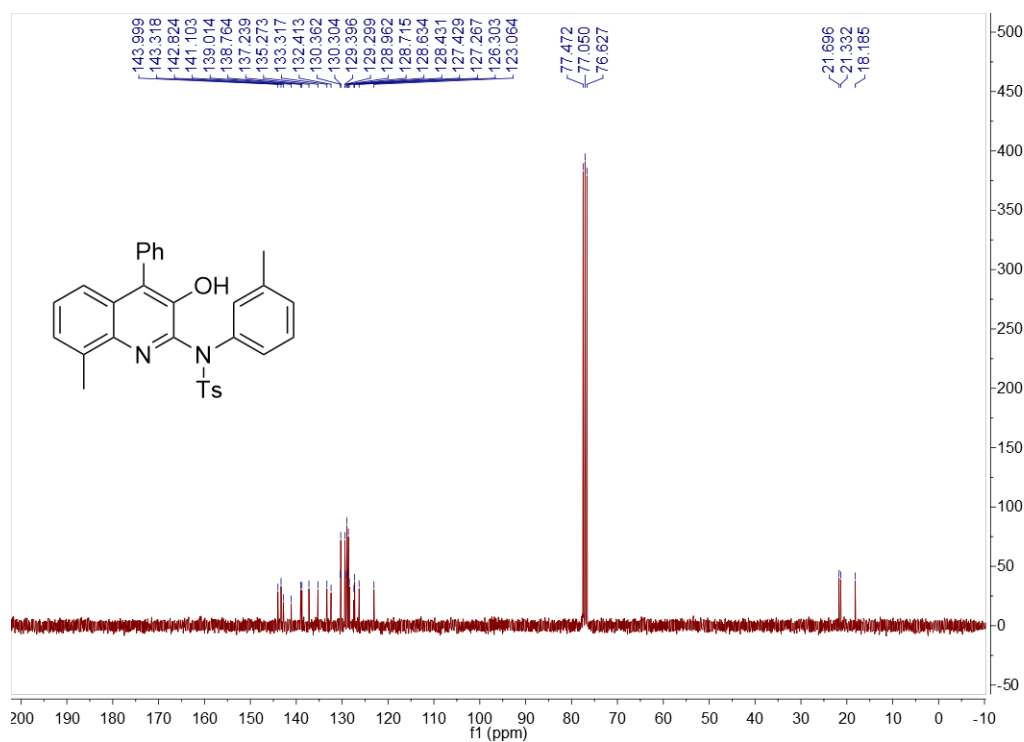

<sup>1</sup>H NMR of compound **6e** in CDCl<sub>3</sub>

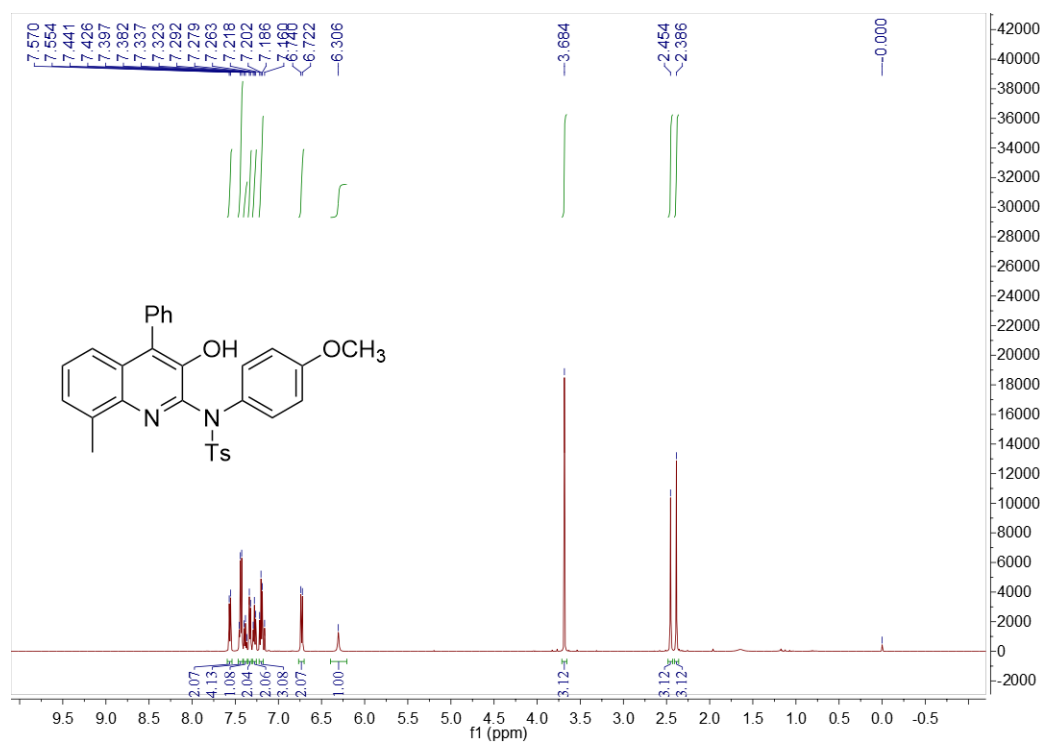

<sup>13</sup>C NMR of compound **6e** in CDCl<sub>3</sub>

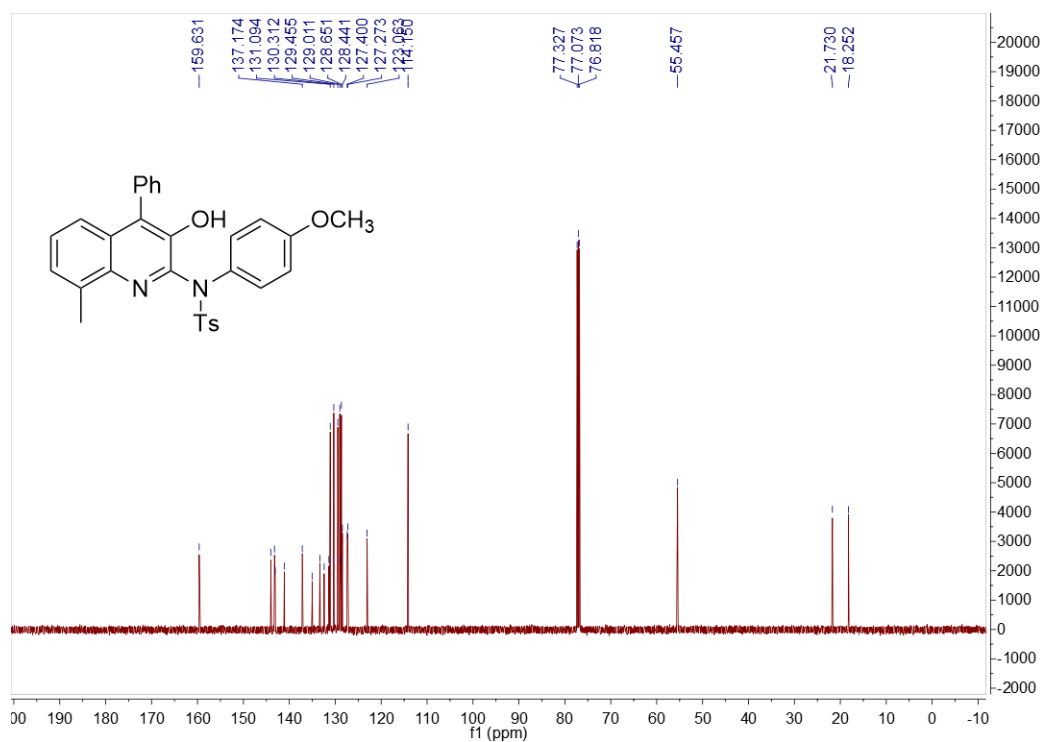

<sup>1</sup>H NMR of compound **6f** in CDCl<sub>3</sub>

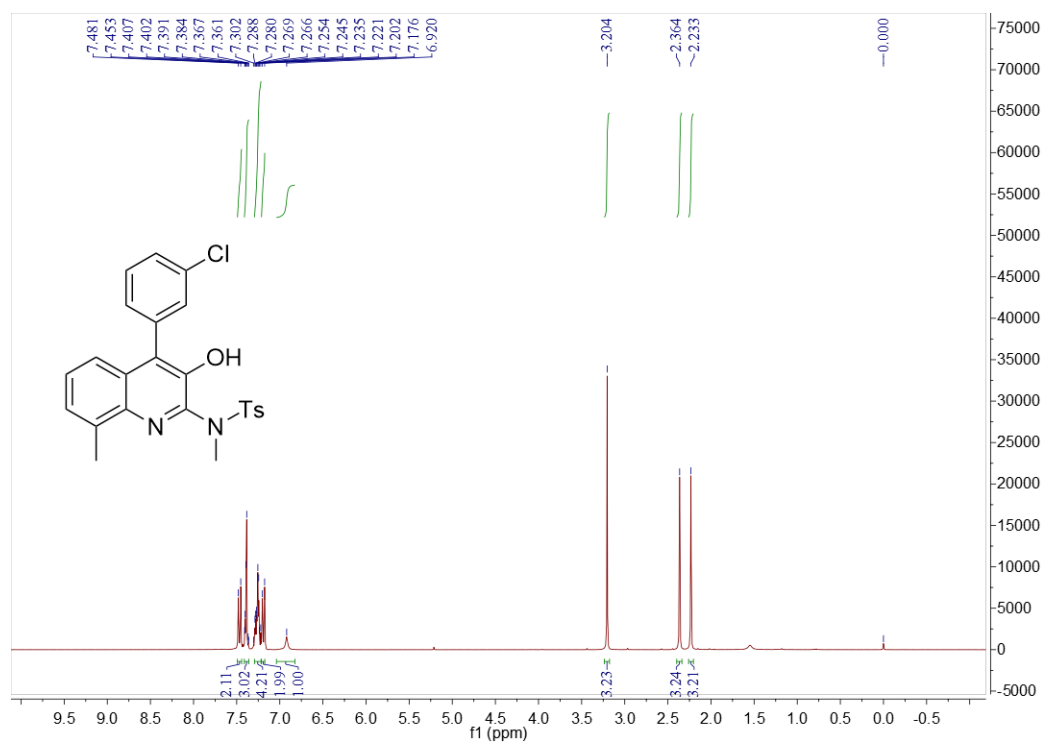

<sup>13</sup>C NMR of compound **6f** in CDCl<sub>3</sub>

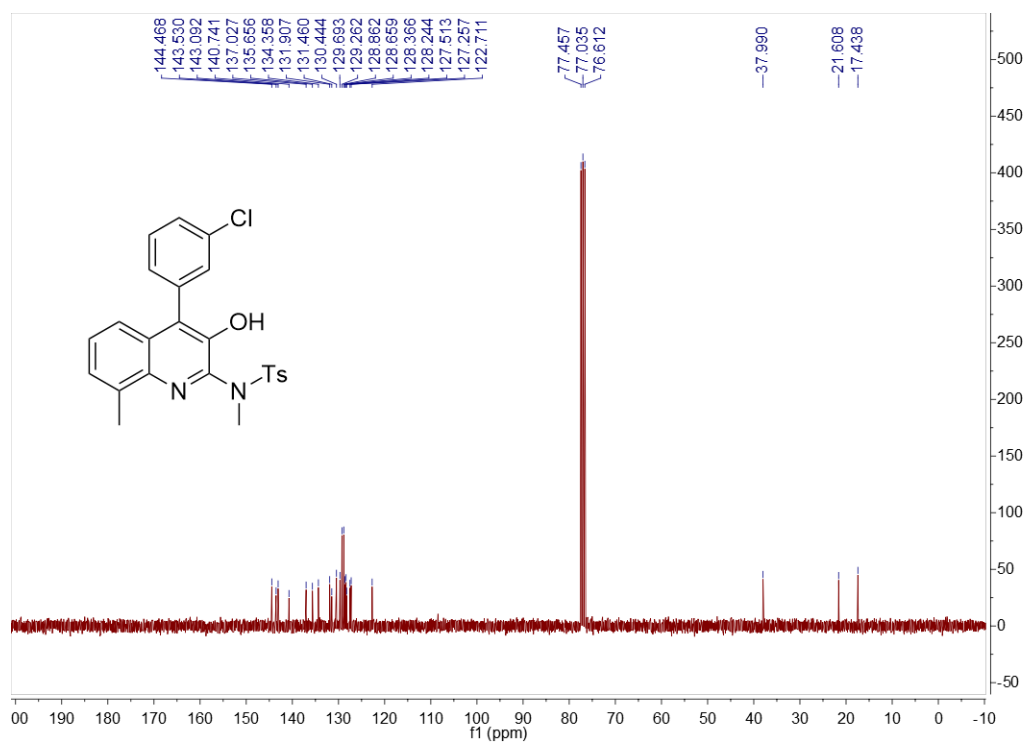

<sup>1</sup>H NMR of compound **6g** in CDCl<sub>3</sub>

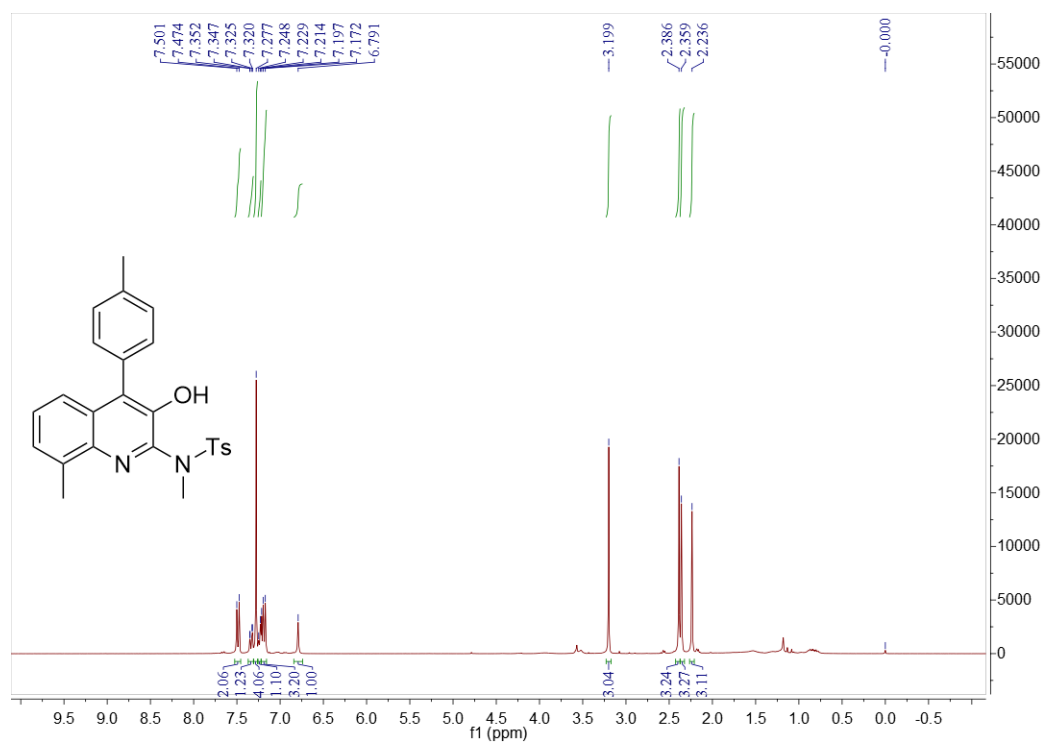

<sup>13</sup>C NMR of compound **6g** in CDCl<sub>3</sub>

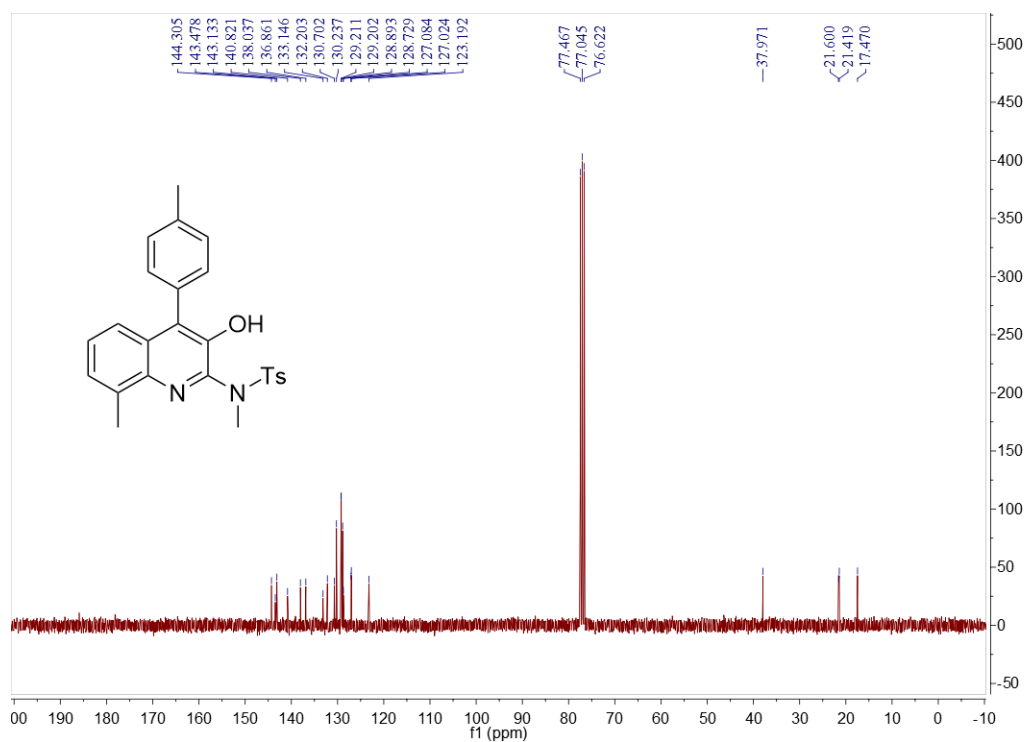

<sup>1</sup>H NMR of compound **6h** in CDCl<sub>3</sub>

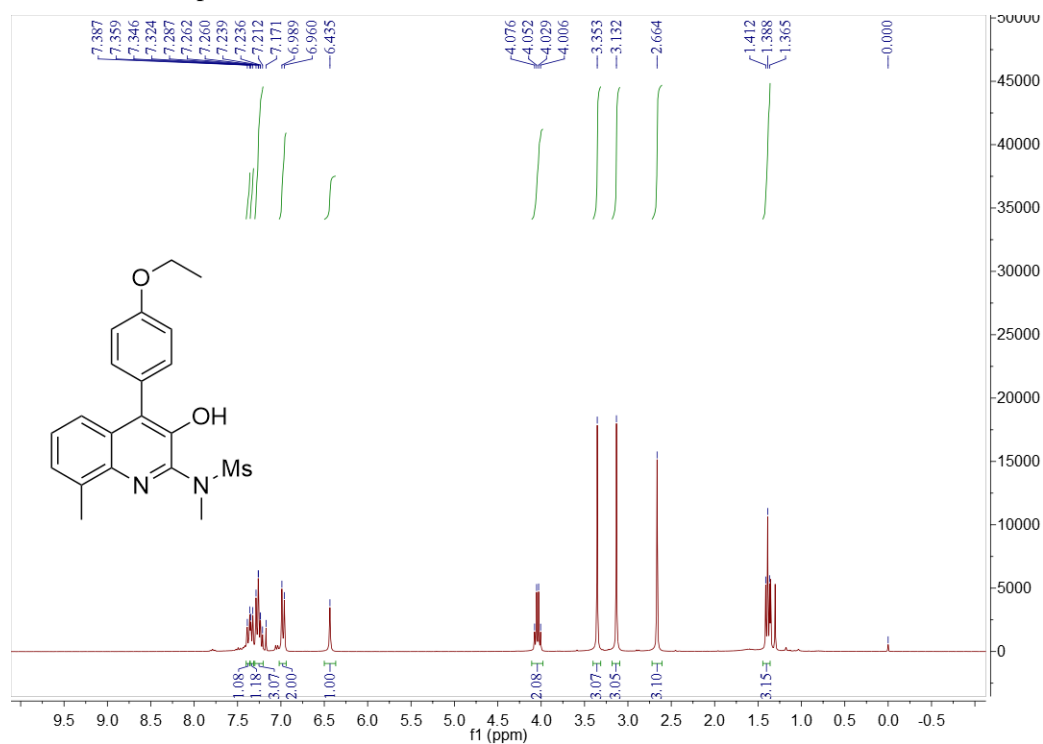

<sup>13</sup>C NMR of compound **6h** in CDCl<sub>3</sub>

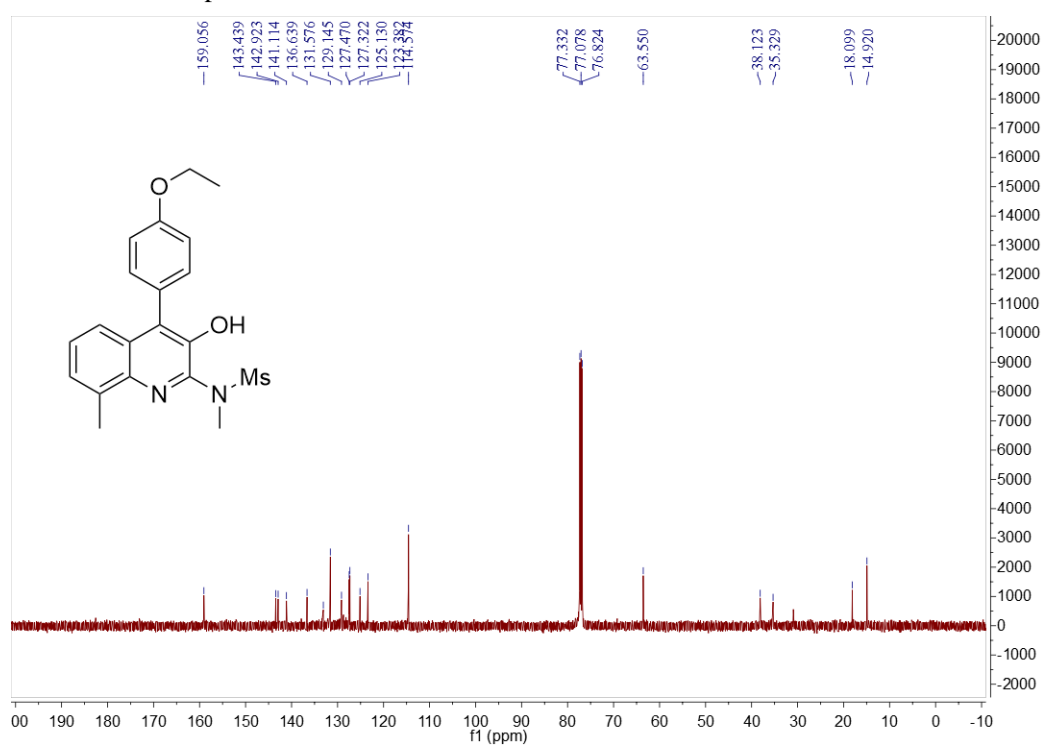



<sup>1</sup>H NMR of compound **6i** in CDCl<sub>3</sub>

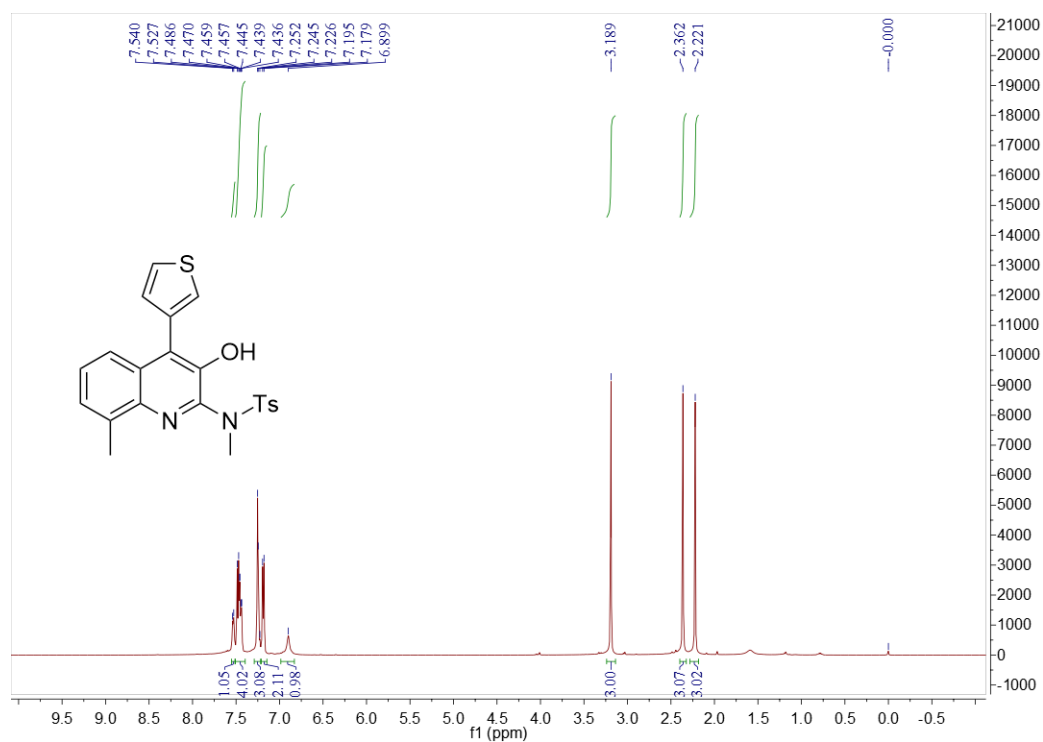

<sup>13</sup>C NMR of compound **6i** in CDCl<sub>3</sub>

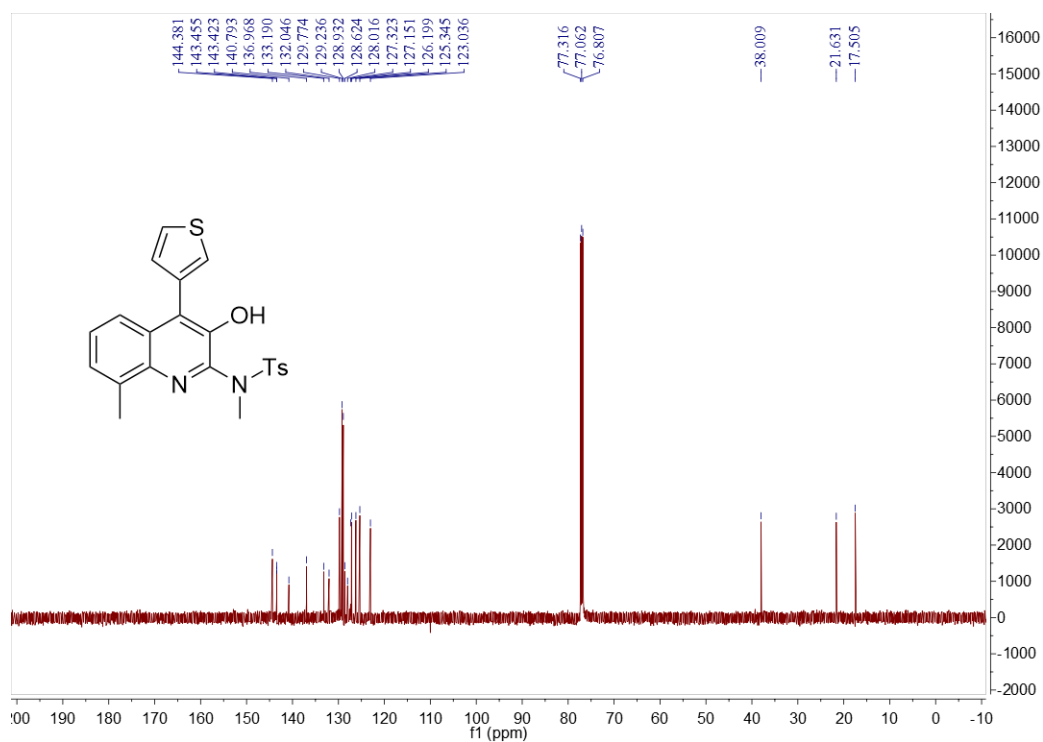

<sup>1</sup>H NMR of compound **6j** in CDCl<sub>3</sub>

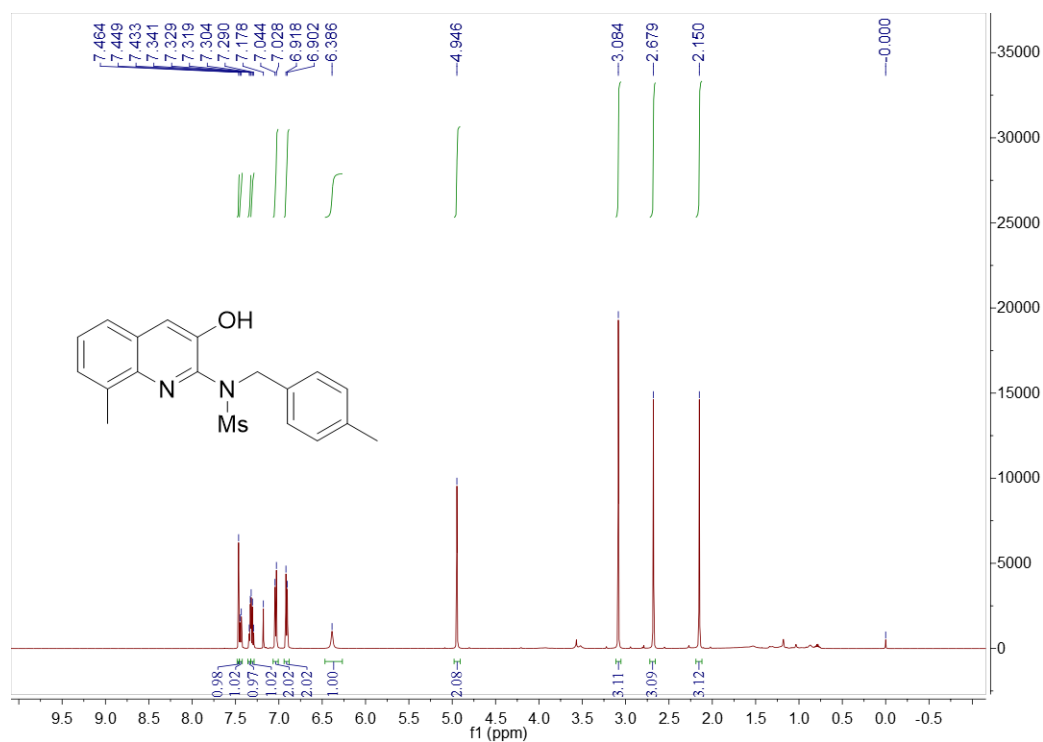

<sup>13</sup>C NMR of compound **6j** in CDCl<sub>3</sub>

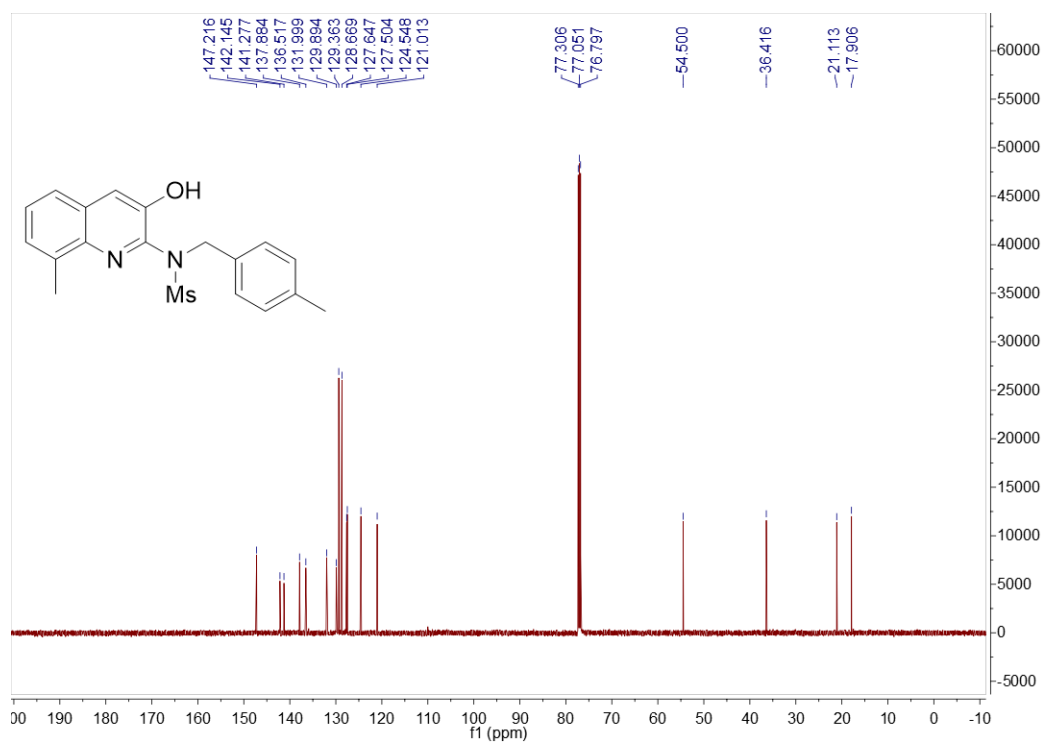

<sup>1</sup>H NMR of compound **6k** in CDCl<sub>3</sub>

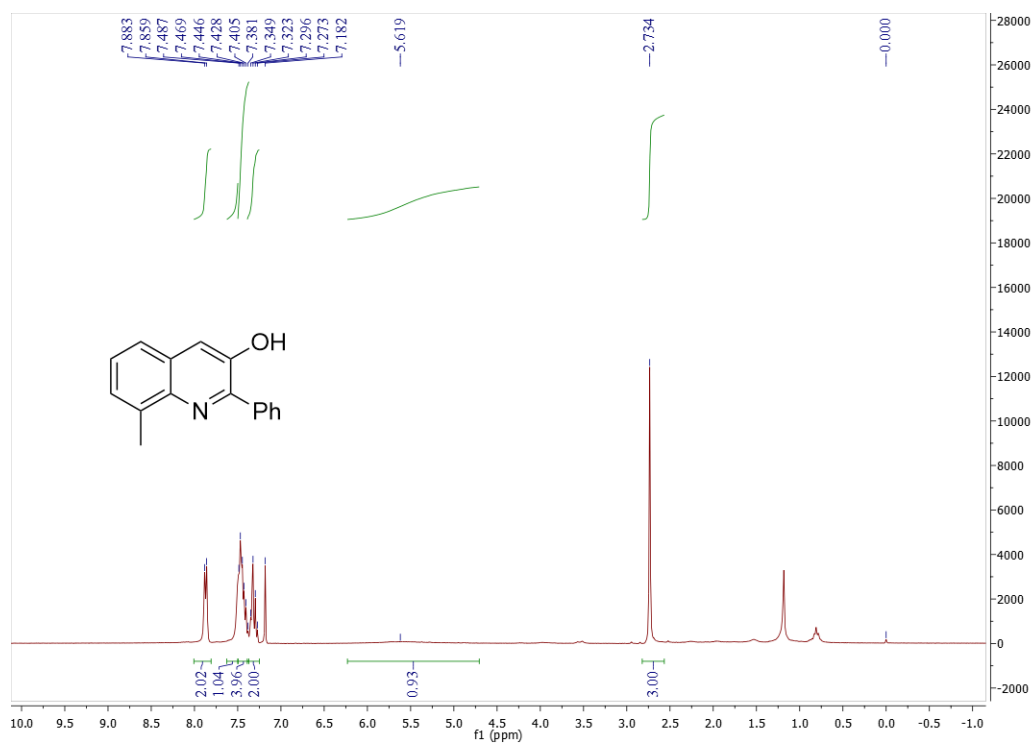

<sup>13</sup>C NMR of compound **6k** in CDCl<sub>3</sub>

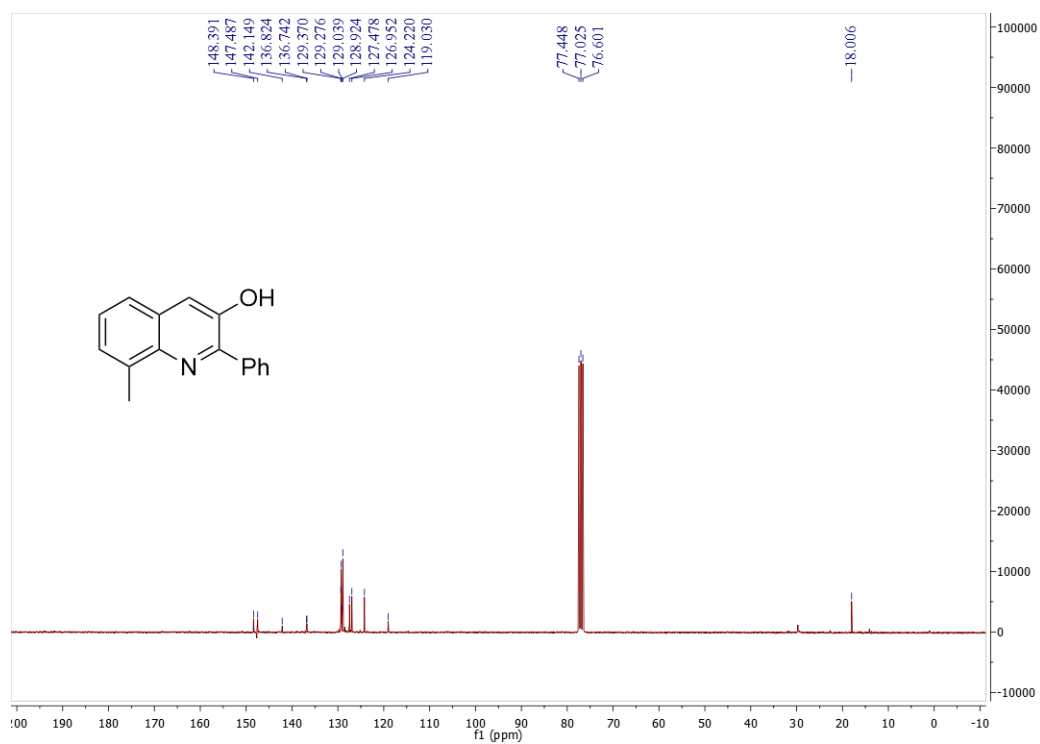

<sup>1</sup>H NMR of compound **6l** in CDCl<sub>3</sub>

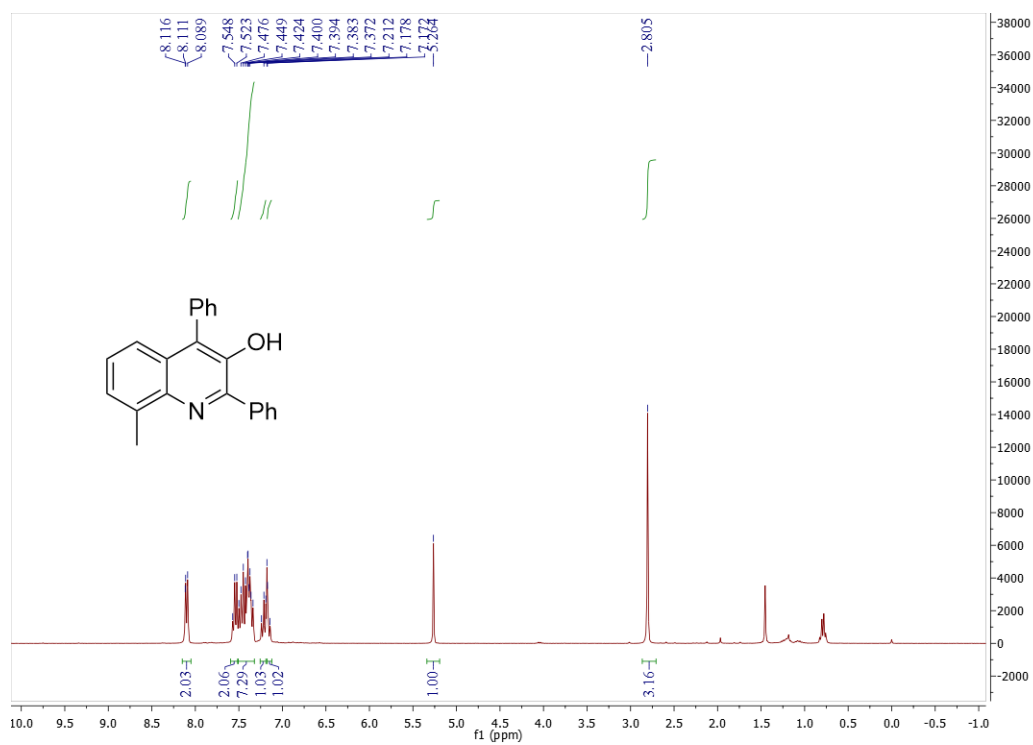

<sup>13</sup>C NMR of compound **6l** in CDCl<sub>3</sub>

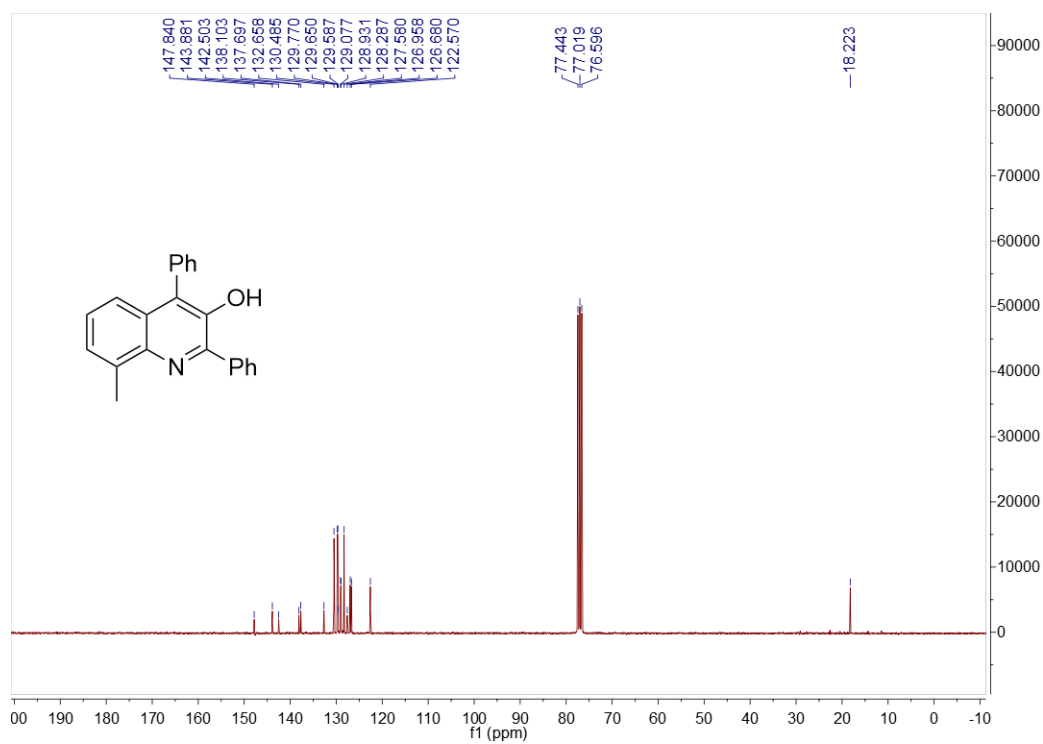

<sup>1</sup>H NMR of compound **7a** in CDCl<sub>3</sub>

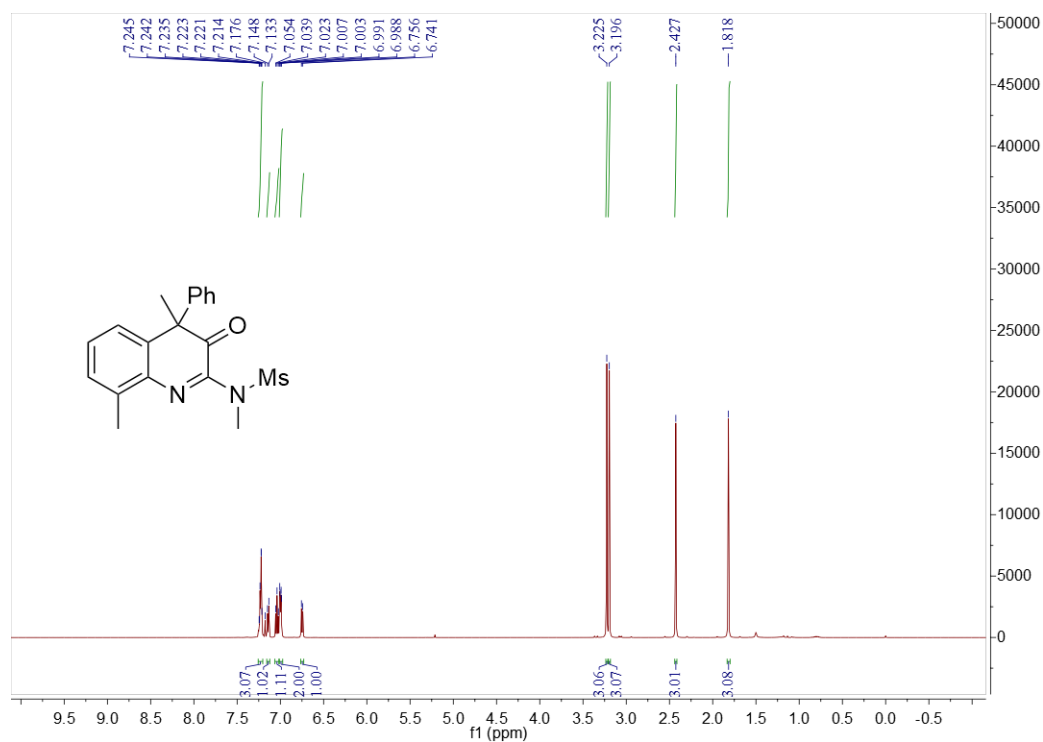

<sup>13</sup>C NMR of compound **7a** in CDCl<sub>3</sub>

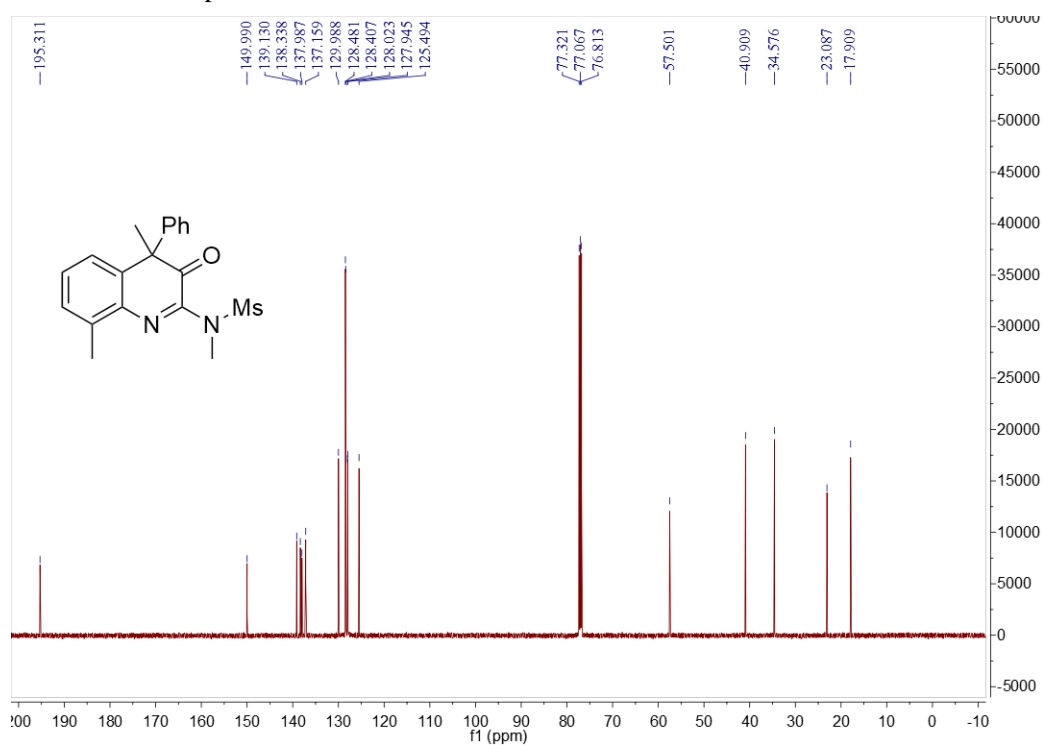

<sup>1</sup>H NMR of compound **7b** in CDCl<sub>3</sub>

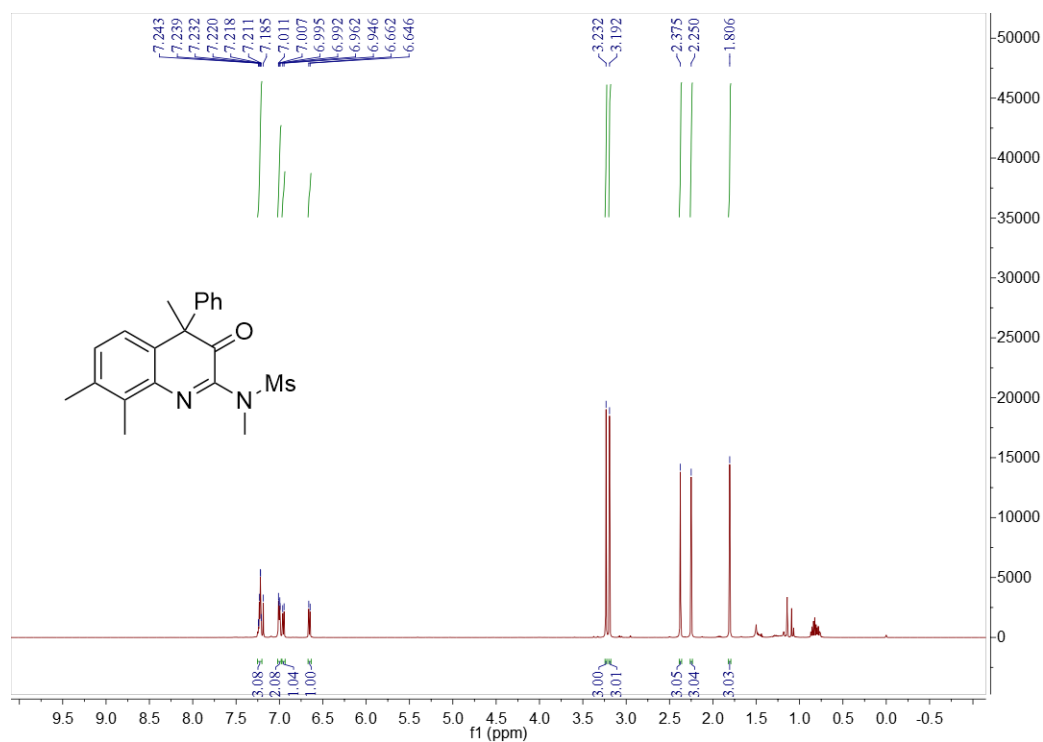

<sup>13</sup>C NMR of compound **7b** in CDCl<sub>3</sub>

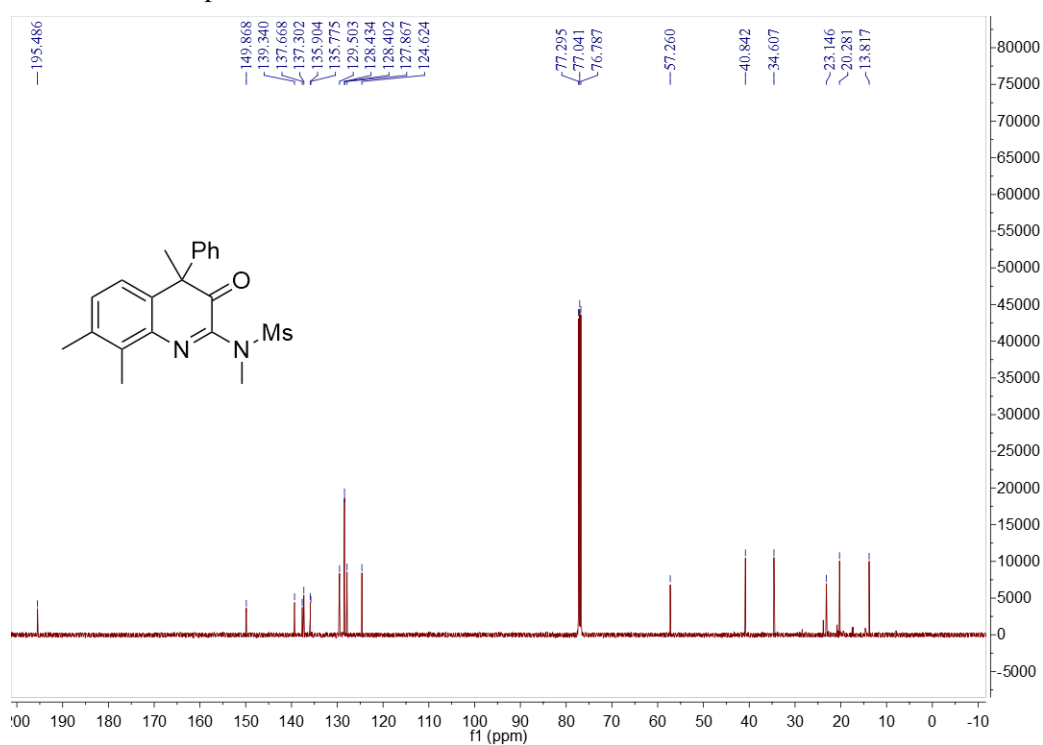

<sup>1</sup>H NMR of compound **3a'** in DMSO-*d*<sub>6</sub>

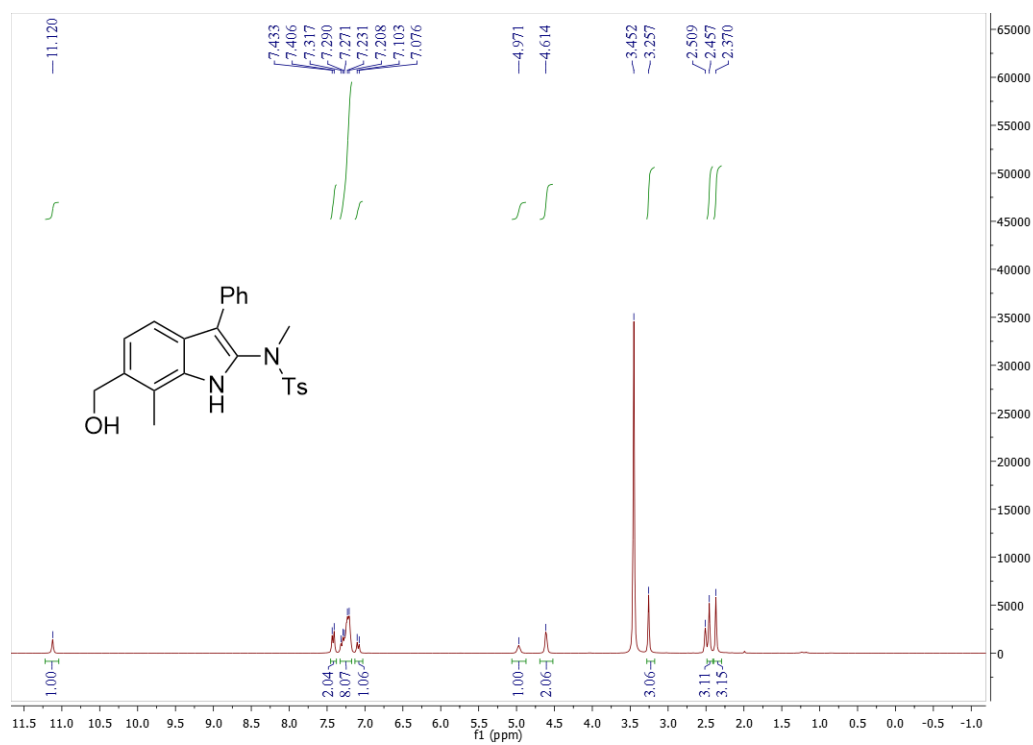

<sup>13</sup>C NMR of compound **3a'** in DMSO-*d*<sub>6</sub>

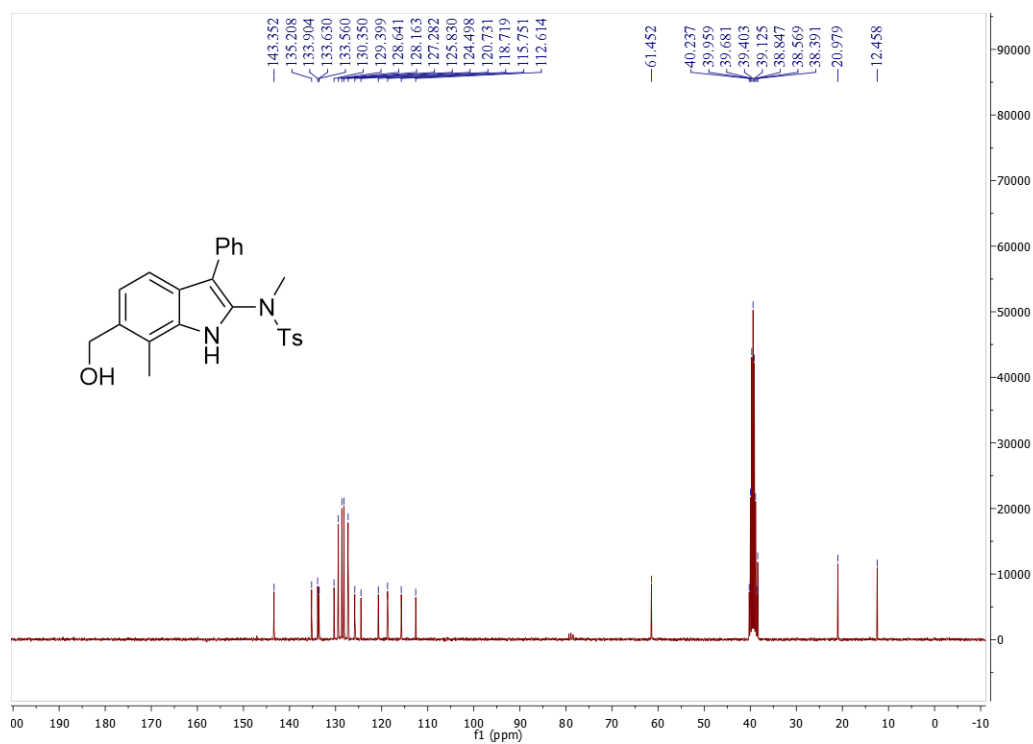

$^1\text{H}$  NMR of compound **3a''** in  $\text{CDCl}_3$

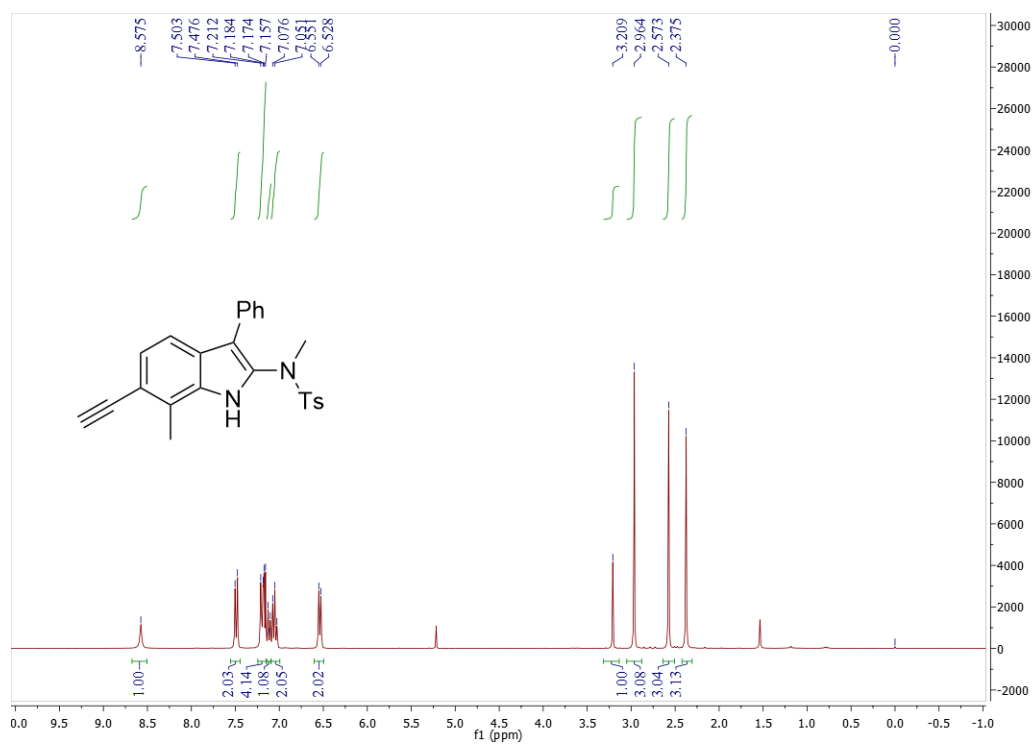

$^{13}\text{C}$  NMR of compound **3a''** in  $\text{CDCl}_3$

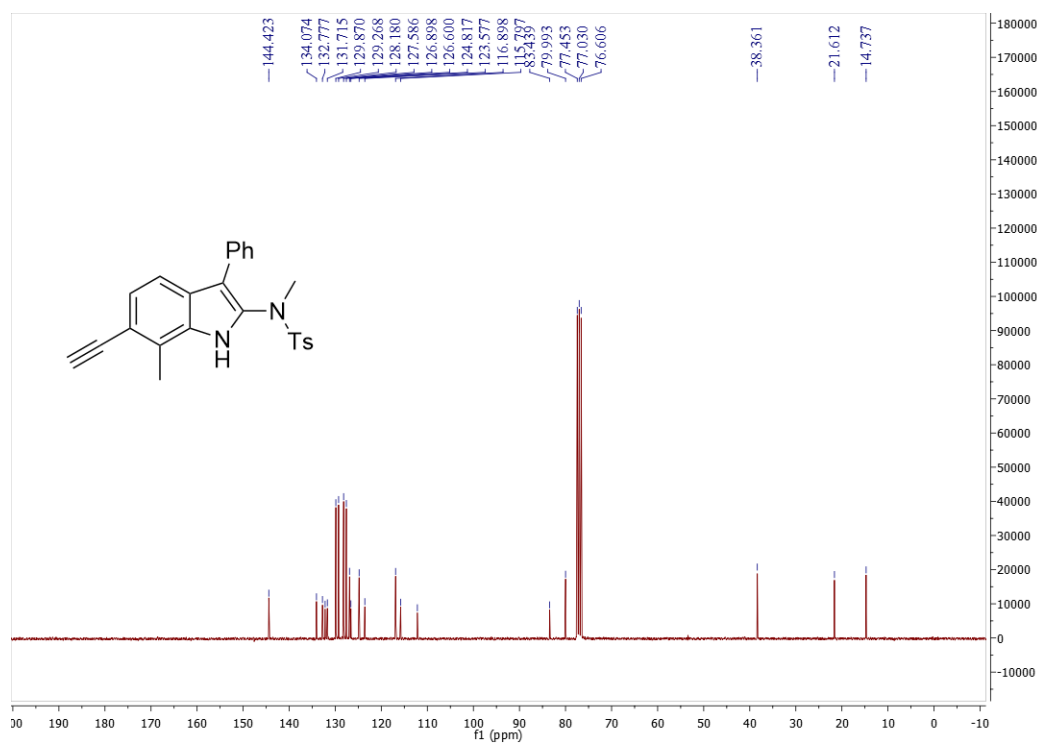



<sup>13</sup>C NMR of compound **3a'''** in CDCl<sub>3</sub>

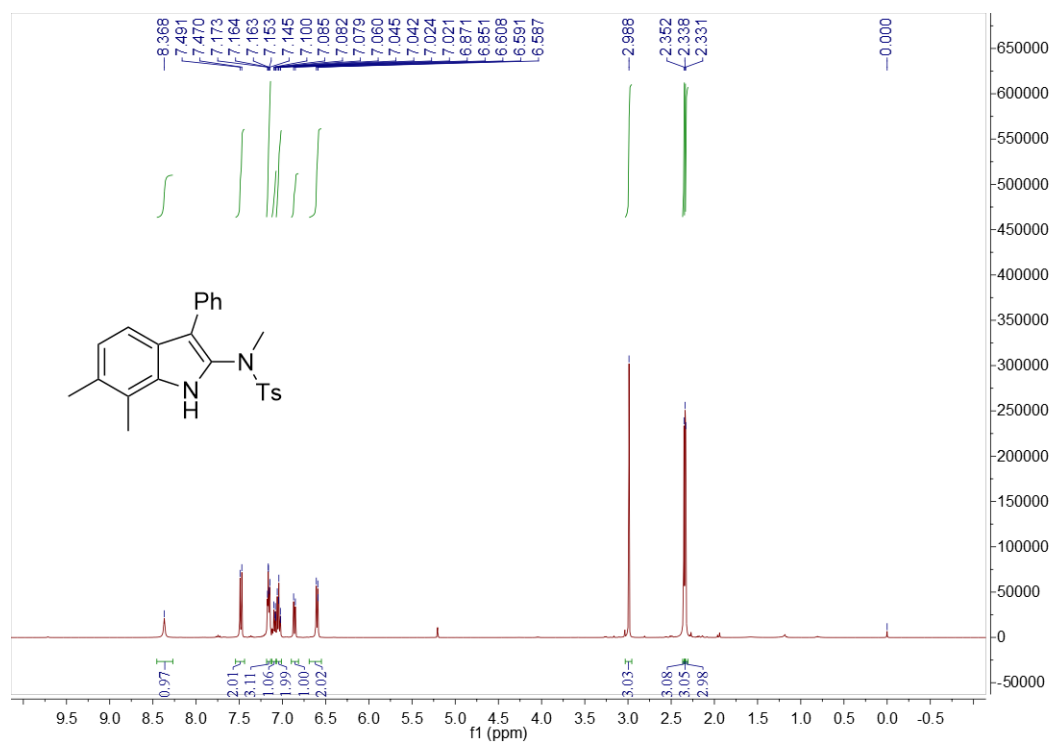

<sup>13</sup>C NMR of compound **3a'''** in CDCl<sub>3</sub>

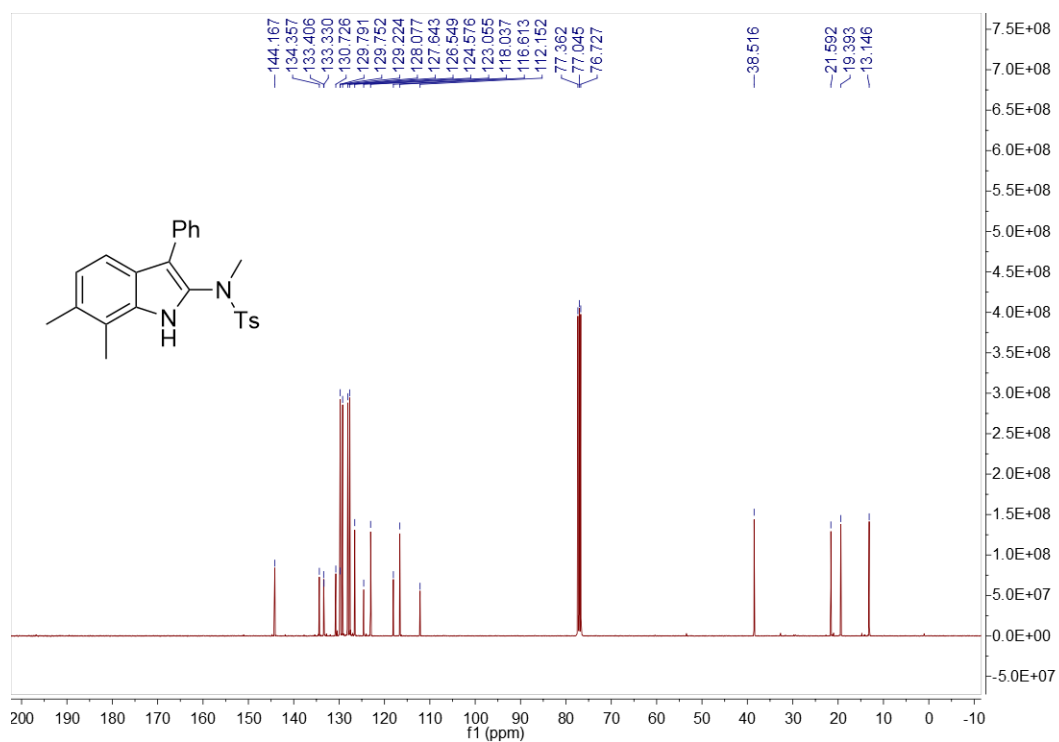

<sup>1</sup>H NMR of compound **8** in CDCl<sub>3</sub>

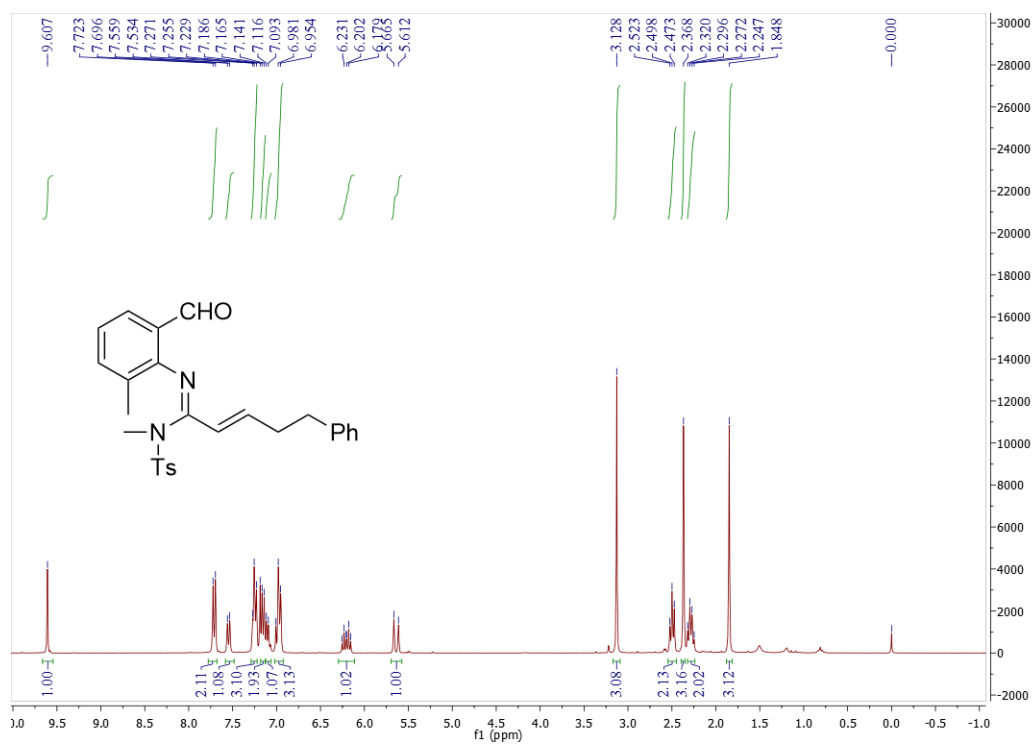

<sup>13</sup>C NMR of compound **8** in CDCl<sub>3</sub>

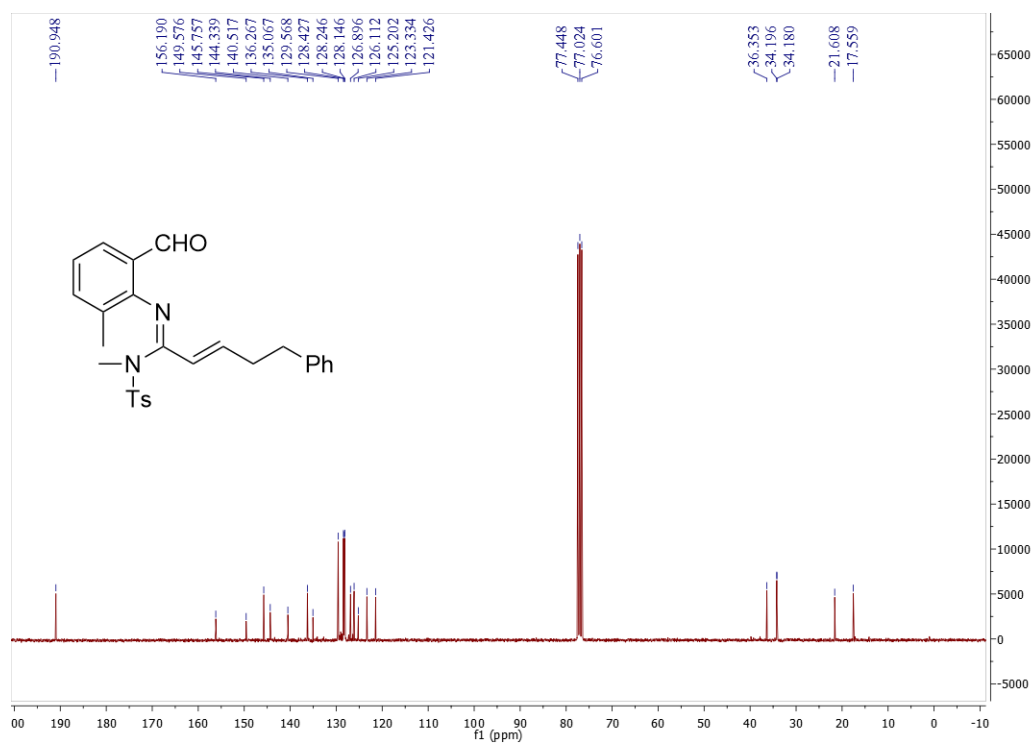

<sup>1</sup>H NMR of compound **9** in CDCl<sub>3</sub>

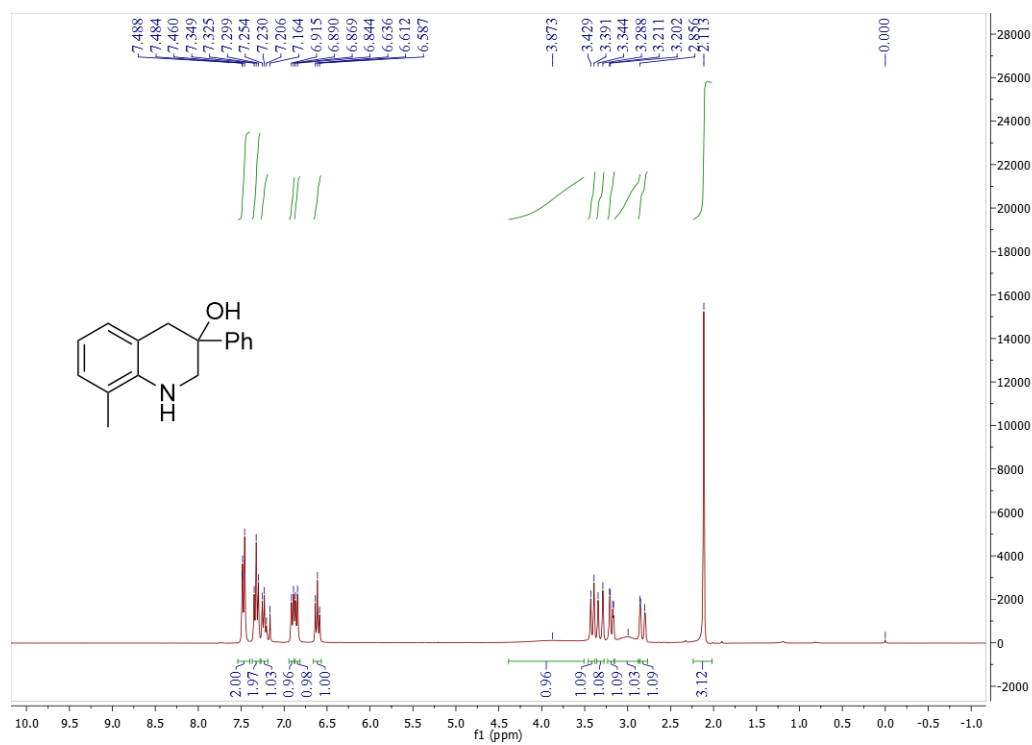

<sup>13</sup>C NMR of compound **9** in CDCl<sub>3</sub>

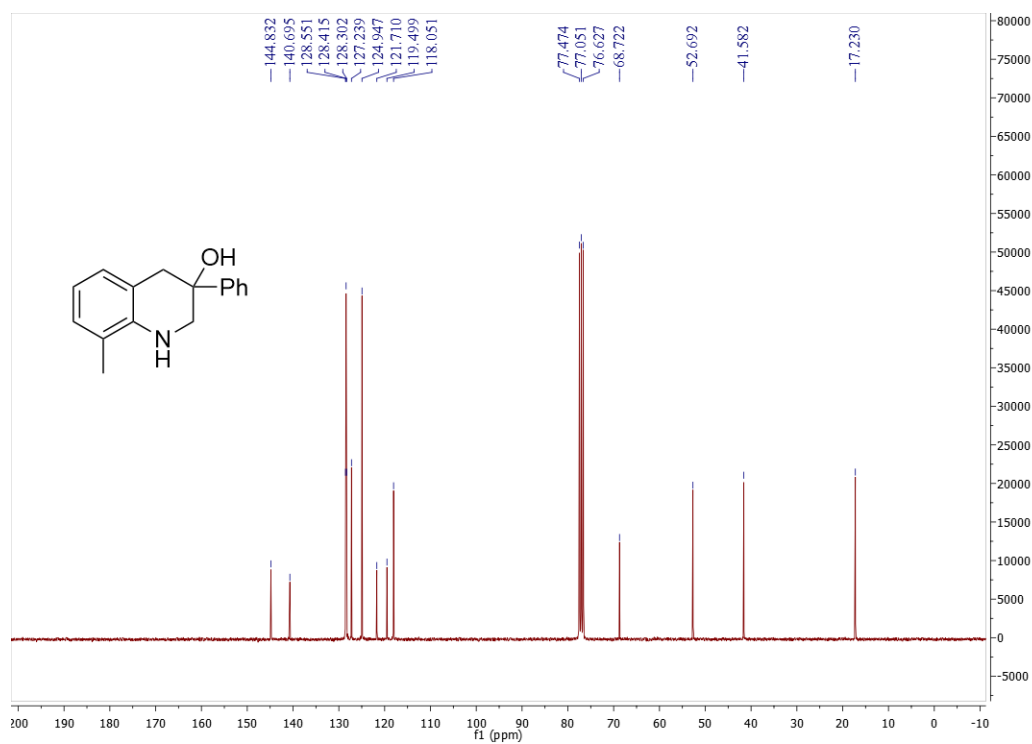

<sup>1</sup>H NMR of compound **10** in CDCl<sub>3</sub>

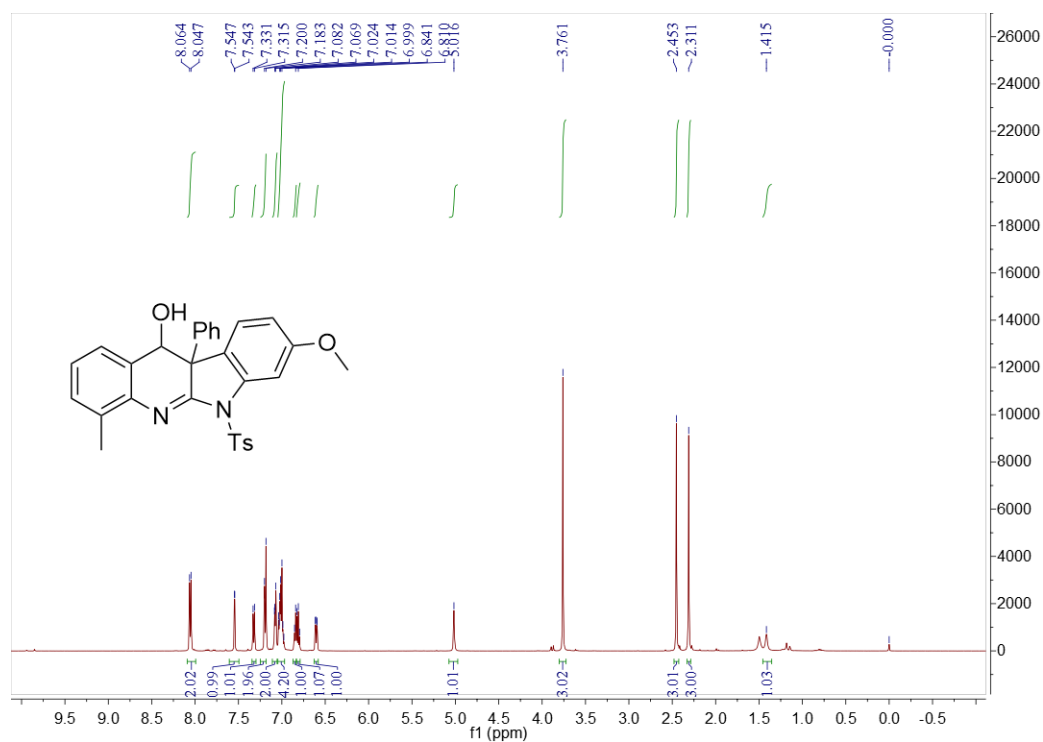

<sup>13</sup>C NMR of compound **10** in CDCl<sub>3</sub>

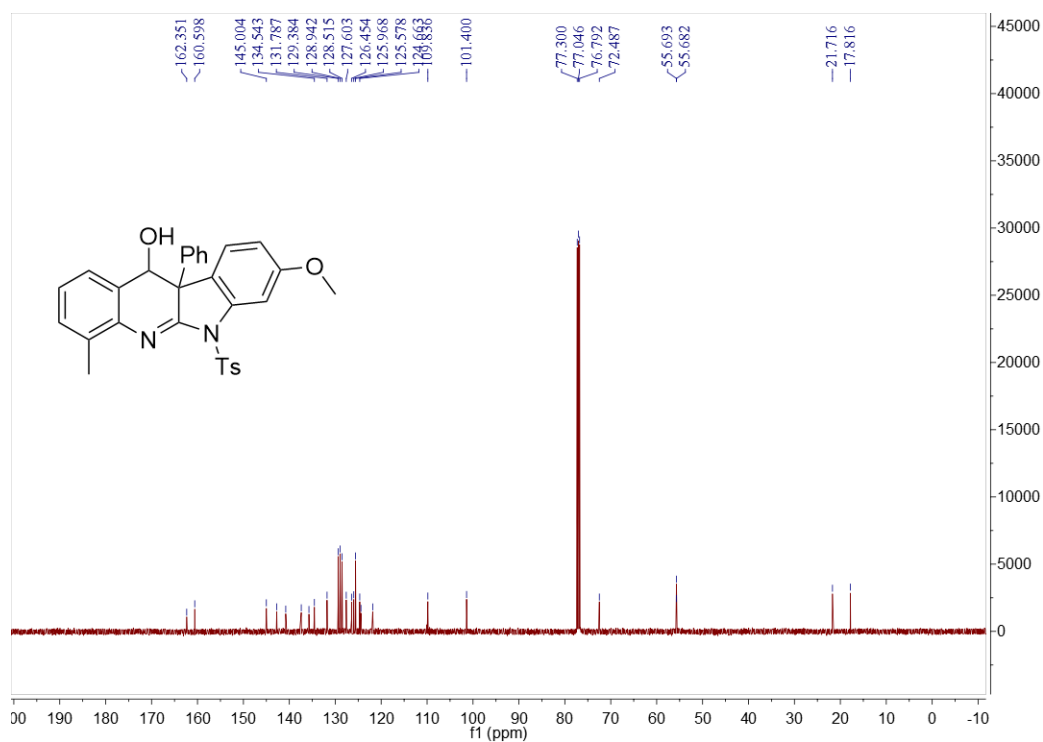

2D NOESY of **10** in DMSO-*d*<sub>6</sub>

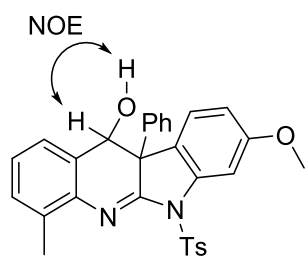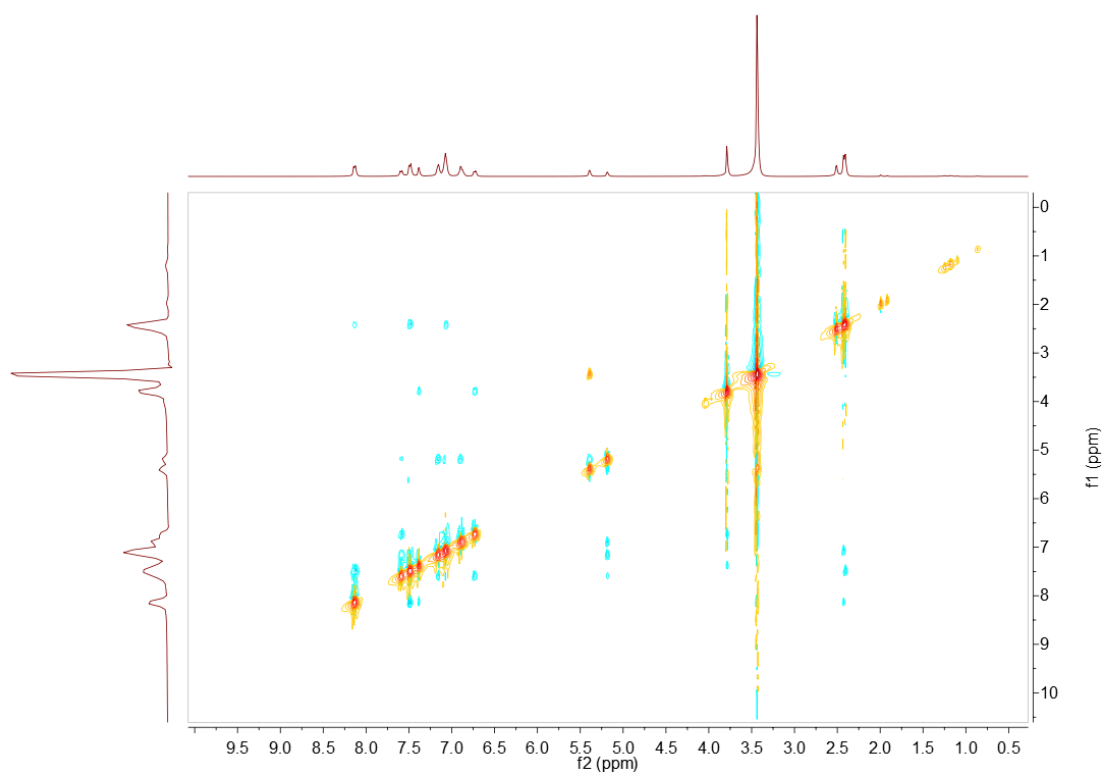

7. Solid state molecular structures of **3y**, **4b**, **5b**, **6a** and **6b**.

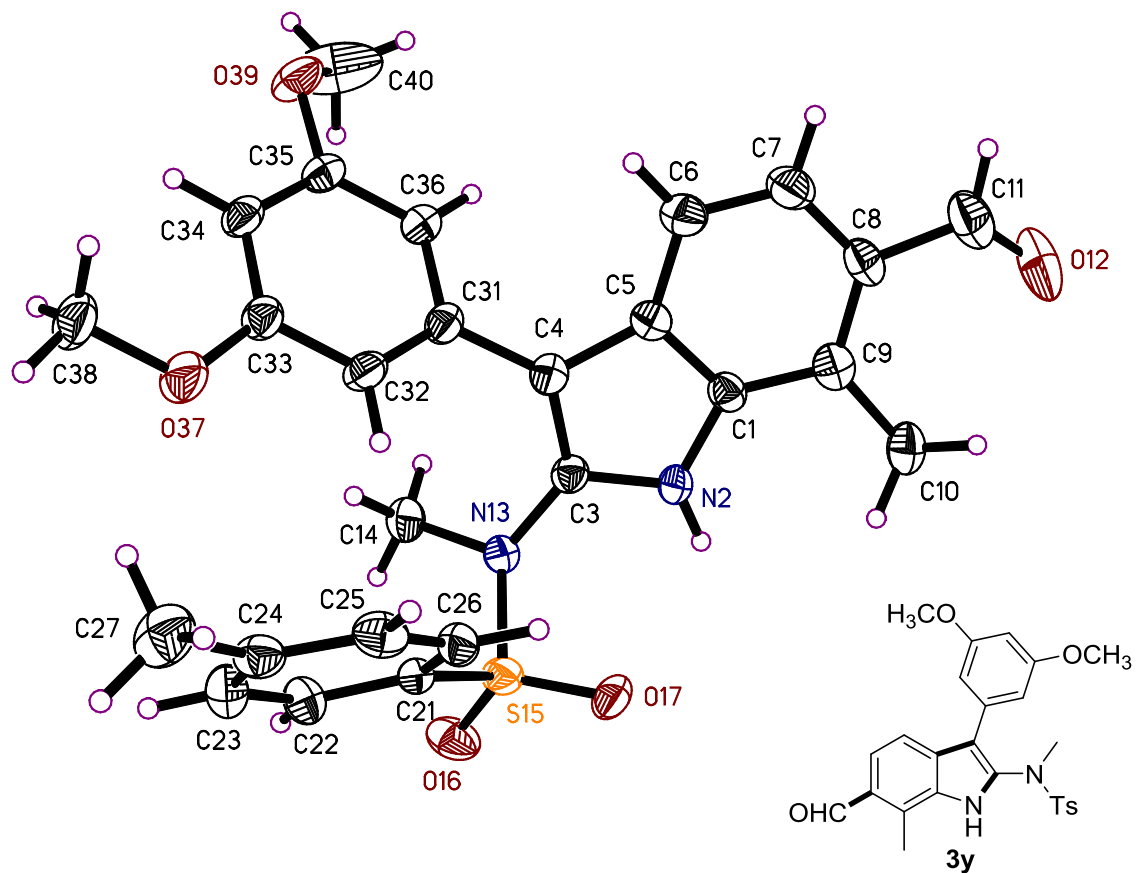

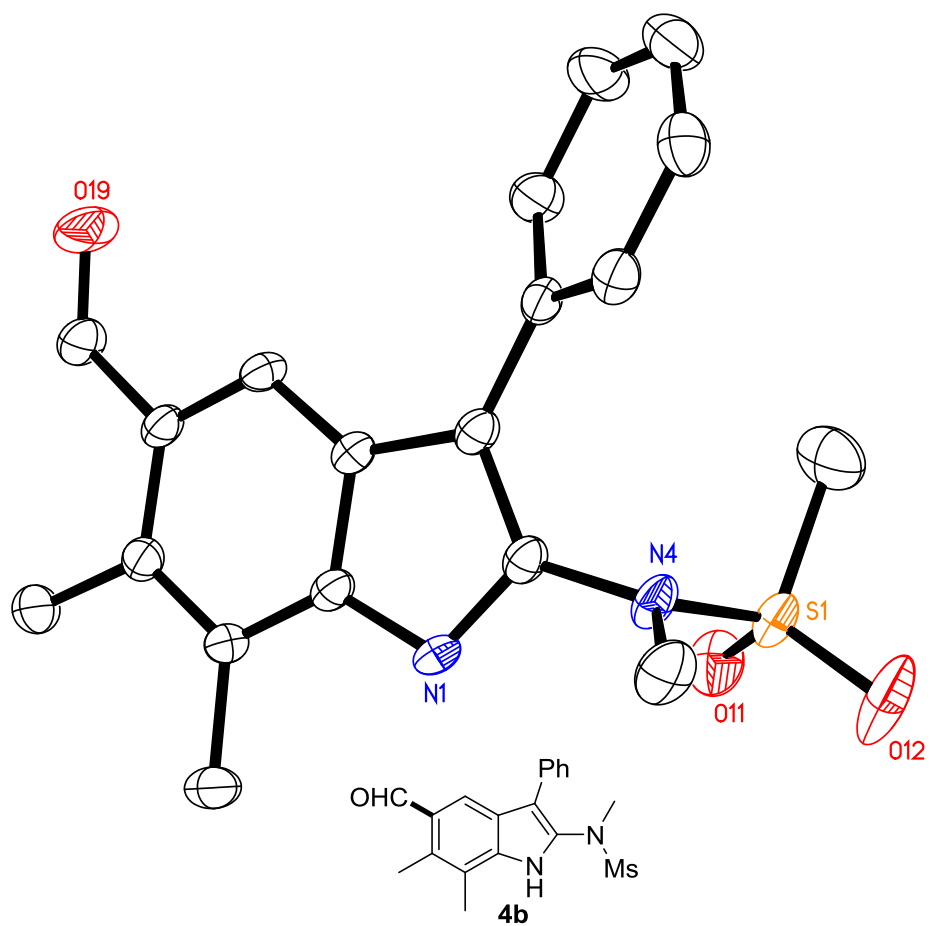

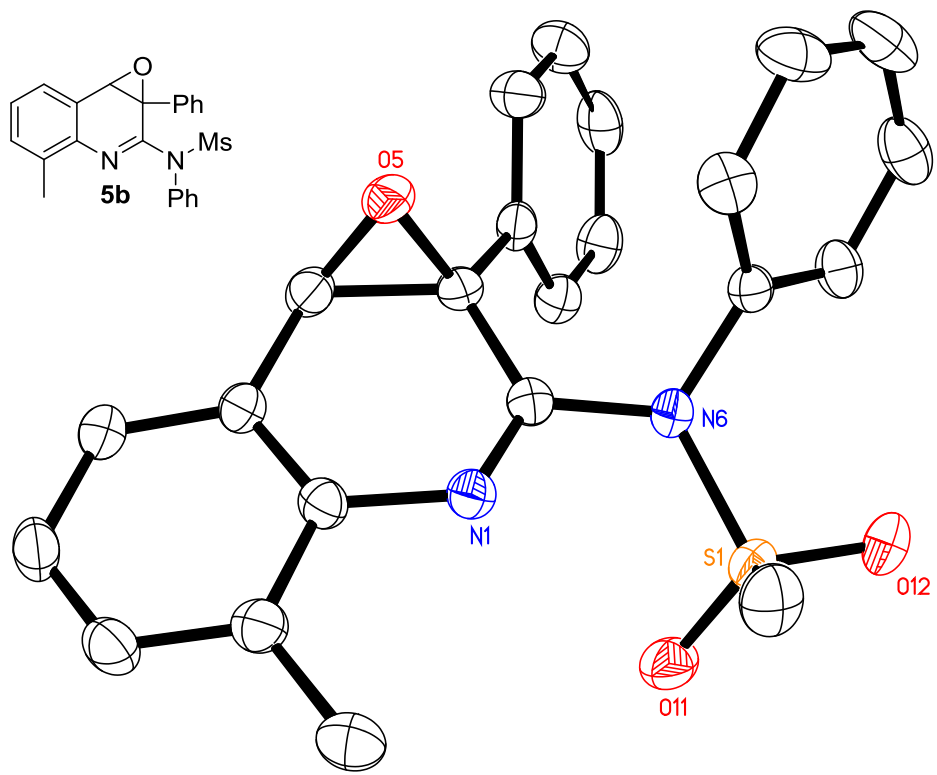



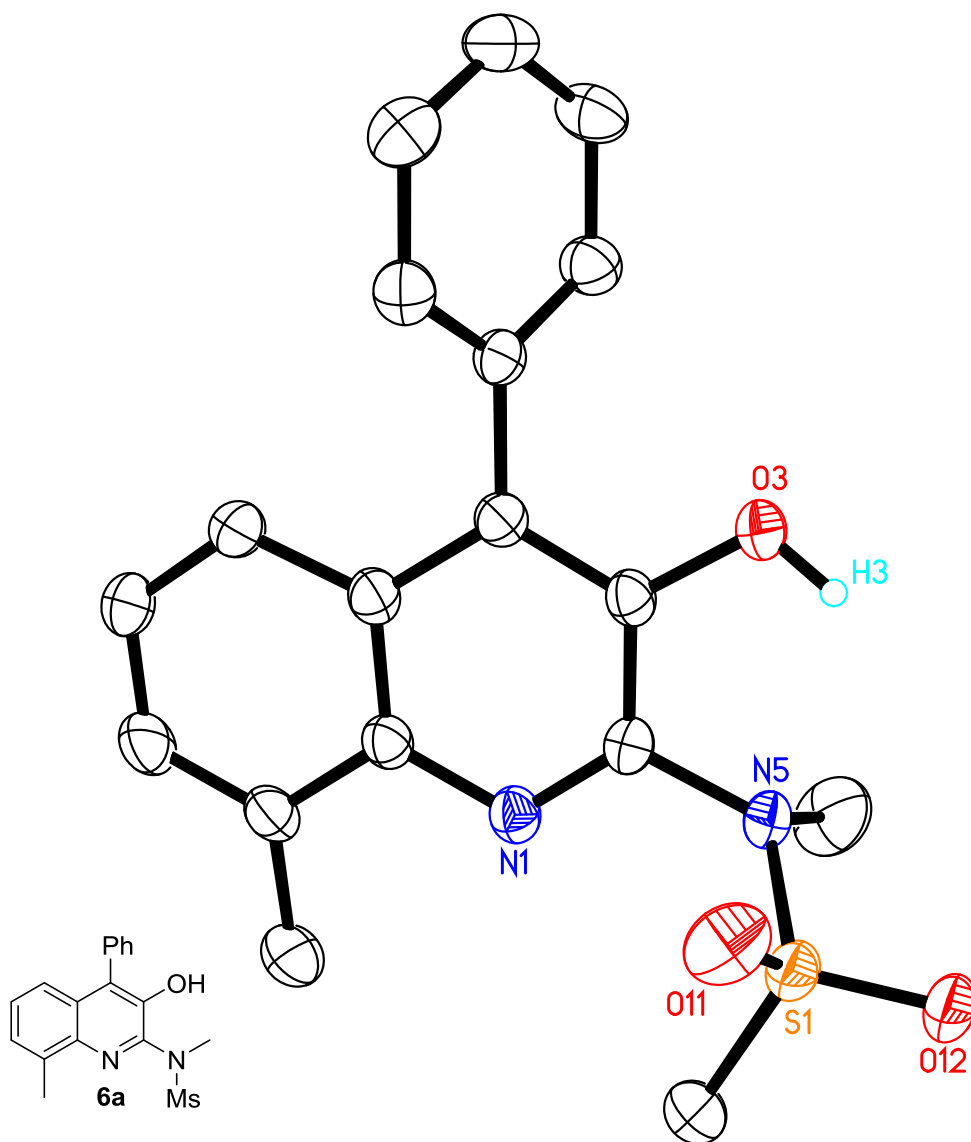

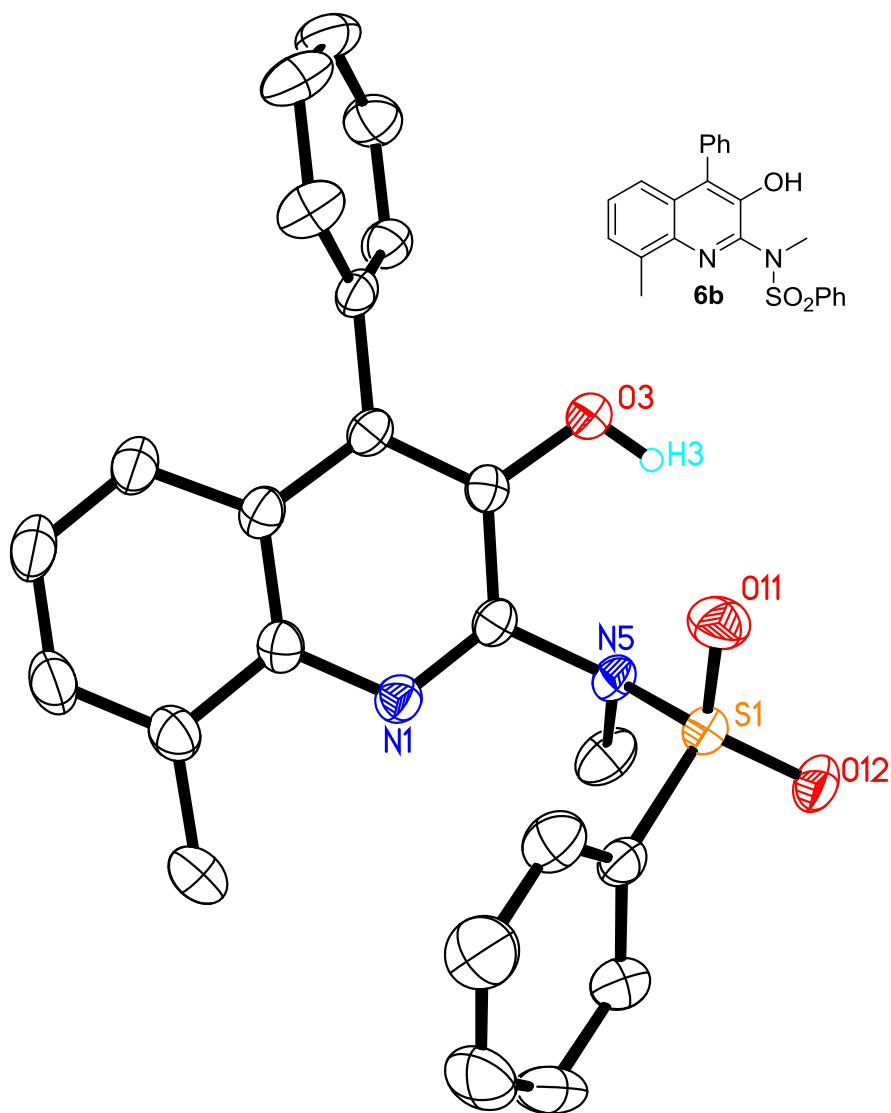

## 8. Computational Details

Gaussian 09<sup>[1]</sup> was used to fully optimize all the structures reported in this paper at the M06 level of theory.<sup>[2]</sup> For all the calculations, solvent effects were considered using the CPCM solvation model with dichloromethane as the solvent.<sup>[3]</sup> The effective core potential of Hay and Wadt with a double- $\xi$  valence basis set (LANL2DZ) was chosen to describe gold.<sup>[4]</sup> The 6-31G(d) basis set was used for other atoms.<sup>[5]</sup> A polarization function was also added for Au ( $\xi_d = 1.050$ ).<sup>[6]</sup> This basis set combination will be referred to as BS1. Frequency calculations were carried out at the same level of theory as those for the structural optimization. Transition structures were located using the Berny algorithm. Intrinsic reaction coordinate (IRC) calculations were used to confirm the connectivity between transition structures and minima.<sup>[7]</sup> To further refine the energies obtained from the CPCM/M06/BS1 level, we carried out single-point energy calculations using the M06 functional method with SMD<sup>[8]</sup> solvation model in dichloromethane along with a larger basis set (BS2) for all the optimized structures. BS2 utilizes the def2-TZVP basis set<sup>[9]</sup> on all atoms. We also employed the D3 empirical dispersion correction for all the single point calculations. Tight convergence criterion and ultrafine integral grid were exploited to increase the accuracy of the single point calculations. In this work, the free energy for each species in solution was calculated using the following formula:

$$G = E(\text{BS2}) + G(\text{BS1}) - E(\text{BS1}) + \Delta G^{1\text{atm} \rightarrow 1\text{M}} \quad (1)$$

where  $\Delta G^{1\text{atm} \rightarrow 1\text{M}} = 1.89$  kcal/mol is the free-energy change for compression of 1 mol of an ideal gas from 1 atm to the 1 M solution phase standard state.<sup>[10]</sup>

[1] Gaussian 09, Revision D.01, M. J. Frisch, G. W. Trucks, H. B. Schlegel, G. E. Scuseria, M. A. Robb, J. R. Cheeseman, G. Scalmani, V. Barone, B. Mennucci, G. A. Petersson, H. Nakatsuji, M. Caricato, X. Li, H. P. Hratchian, A. F. Izmaylov, J. Bloino, G. Zheng, J. L.

- Sonnenberg, M. Hada, M. Ehara, K. Toyota, R. Fukuda, J. Hasegawa, M. Ishida, T. Nakajima, Y. Honda, O. Kitao, H. Nakai, T. Vreven, J. A. Montgomery, Jr., J. E. Peralta, F. Ogliaro, M. Bearpark, J. J. Heyd, E. Brothers, K. N. Kudin, V. N. Staroverov, R. Kobayashi, J. Normand, K. Raghavachari, A. Rendell, J. C. Burant, S. S. Iyengar, J. Tomasi, M. Cossi, N. Rega, J. M. Millam, M. Klene, J. E. Knox, J. B. Cross, V. Bakken, C. Adamo, J. Jaramillo, R. Gomperts, R. E. Stratmann, O. Yazyev, A. J. Austin, R. Cammi, C. Pomelli, J. W. Ochterski, R. L. Martin, K. Morokuma, V. G. Zakrzewski, G. A. Voth, P. Salvador, J. J. Dannenberg, S. Dapprich, A. D. Daniels, Farkas, J. B. Foresman, J. V. Ortiz, J. Cioslowski, D. J. Fox, Gaussian, Inc., Wallingford CT, **2009**.
- [2] Y. Zhao, D. G. Truhlar, *Theor. Chem. Acc.* **2008**, *120*, 215.
- [3] V. Barone, M. Cossi, *J. Phys. Chem. A* **1998**, *102*, 1995.
- [4] a) P. J. Hay, W. R. Wadt, *J. Chem. Phys.* **1985**, *82*, 270; b) W. R. Wadt, P. J. Hay, *J. Chem. Phys.* **1985**, *82*, 284.
- [5] P. C. Hariharan, J. A. Pople, *Theoret. chim. Acta* **1973**, *28*, 213.
- [6] A. Höllwarth, M. Böhme, S. Dapprich, A. Ehlers, A. Gobbi, V. Jonas, K. Köhler, R. Stegmann, A. Veldkamp, G. Frenking, *Phys. Lett.* **1993**, *208*, 237.
- [7] a) K. Fukui, *Acc. Chem. Res.* **1981**, *14*, 363; b) K. Fukui, *J. Phys. Chem.* **1970**, *74*, 4161.
- [8] A. V. Marenich, C. J. Cramer, D. G. Truhlar, *J. Phys. Chem. B* **2009**, *113*, 6378.
- [9] F. Weigend, F. Furche, R. Ahlrichs, *J. Chem. Phys.* **2003**, *119*, 12753.
- [10] J. Ochterski, W. Thermochemistry, Gaussian, Gaussian, Inc., Wallingford, CT, **2000**, pp. 1–19.

Table S1 Cartesian coordinates and total energies for all of the calculated structures.

i

E (M06-D3-CPCM/BS1) = -1491.79362436 au

H (M06-D3-CPCM/BS1) = -1491.684573 au

G (M06-D3-CPCM/BS1) = -1491.737094 au

E (M06-D3-SMD/BS2//M06-D3-CPCM/BS1) = -1492.37326996 au

|    |             |             |             |
|----|-------------|-------------|-------------|
| C  | 3.12286700  | -1.96272700 | 0.00031900  |
| C  | 3.97737400  | -0.86696000 | 0.00059300  |
| C  | 3.44117200  | 0.41794000  | 0.00025700  |
| C  | 2.06861800  | 0.56321900  | -0.00021700 |
| C  | 1.74942200  | -1.75590900 | -0.00009900 |
| H  | 3.50511100  | -2.97891100 | 0.00037800  |
| H  | 5.05456800  | -1.01147200 | 0.00071600  |
| H  | 4.05675100  | 1.31381000  | 0.00039500  |
| H  | 1.02732200  | -2.56897900 | -0.00055900 |
| C  | 1.39897500  | 1.90599800  | -0.00047600 |
| O  | 2.03777200  | 2.93612400  | -0.00062000 |
| O  | 0.08327800  | 1.88233800  | -0.00026700 |
| Au | -0.73214300 | 0.02523200  | 0.00006700  |
| Cl | -2.89849700 | 0.89095900  | 0.00051600  |
| Cl | -1.57965400 | -2.15626400 | -0.00059500 |
| N  | 1.25788100  | -0.51352200 | -0.00000900 |

ii

E (M06-D3-CPCM/BS1) = -1221.37612478 au

H (M06-D3-CPCM/BS1) = -1221.082637 au

G (M06-D3-CPCM/BS1) = -1221.152862 au

E (M06-D3-SMD/BS2//M06-D3-CPCM/BS1) = -1221.78985614 au

|   |             |             |             |
|---|-------------|-------------|-------------|
| C | -5.39738900 | -0.13623600 | 0.07642100  |
| C | -4.20863100 | -0.84071100 | 0.21705500  |
| C | -2.97923500 | -0.16541200 | 0.18573800  |
| C | -2.96784000 | 1.22661500  | 0.00571000  |
| C | -4.15945500 | 1.92323200  | -0.14574800 |
| C | -5.37578600 | 1.24462300  | -0.10798000 |
| H | -6.34662600 | -0.66805200 | 0.10571500  |
| H | -4.21692300 | -1.92070400 | 0.35382700  |
| H | -2.01235800 | 1.74929100  | -0.01363900 |
| H | -4.14030000 | 3.00206000  | -0.28902400 |
| H | -6.30901100 | 1.79312400  | -0.22247000 |
| C | -1.75043800 | -0.87585800 | 0.33122600  |
| C | -0.69168400 | -1.45728100 | 0.45016300  |
| S | 1.64029100  | -1.73986100 | -0.63872300 |
| O | 2.79703900  | -2.56705300 | -0.32970400 |
| O | 0.93278100  | -1.87258500 | -1.90118200 |

|   |            |             |             |
|---|------------|-------------|-------------|
| C | 2.04677700 | -0.04195900 | -0.37551500 |
| C | 3.11283800 | 0.28134800  | 0.46181200  |
| C | 1.24578300 | 0.94621900  | -0.94822500 |
| C | 3.38156400 | 1.61935900  | 0.71699300  |
| H | 3.72775900 | -0.50540800 | 0.89440600  |
| C | 1.53130700 | 2.27671000  | -0.67683300 |
| H | 0.42220500 | 0.67354900  | -1.60479800 |
| C | 2.59942500 | 2.63250900  | 0.15405800  |
| H | 4.21593500 | 1.88580600  | 1.36487200  |
| H | 0.91614700 | 3.05909400  | -1.12065800 |
| C | 2.91418300 | 4.07373100  | 0.41195600  |
| H | 3.57615100 | 4.47300700  | -0.36908500 |
| H | 2.00687200 | 4.68932100  | 0.41164400  |
| H | 3.42548600 | 4.20904700  | 1.37205300  |
| N | 0.48831700 | -2.10042500 | 0.58303400  |
| C | 1.00787000 | -2.27278500 | 1.94948700  |
| H | 0.22314600 | -2.74883200 | 2.54347300  |
| H | 1.87986100 | -2.92935700 | 1.91573400  |
| H | 1.27451100 | -1.30873000 | 2.40546700  |

#### TS<sub>i</sub>

E (M06-D3-CPCM/BS1) = -2713.17253935 au

H (M06-D3-CPCM/BS1) = -2712.769866 au

G (M06-D3-CPCM/BS1) = -2712.869265 au

E (M06-D3-SMD/BS2//M06-D3-CPCM/BS1) = -2714.1549846 au

|   |             |             |             |
|---|-------------|-------------|-------------|
| C | 4.63470900  | -0.45331400 | -1.42864500 |
| C | 4.28273600  | 0.03767900  | -2.68082300 |
| C | 2.93909400  | 0.11972000  | -3.02445700 |
| C | 1.97596300  | -0.28406800 | -2.11569200 |
| C | 3.63291400  | -0.84323400 | -0.55294200 |
| H | 5.67230800  | -0.53518800 | -1.11887500 |
| H | 5.05068900  | 0.35331700  | -3.38283000 |
| H | 2.59657400  | 0.49478500  | -3.98543700 |
| H | 3.84370400  | -1.23838800 | 0.43806300  |
| C | 0.49667000  | -0.20383400 | -2.45352600 |
| O | -0.30735700 | -0.62278300 | -1.54709800 |
| O | 0.18139700  | 0.23728400  | -3.55305100 |
| N | 2.34376600  | -0.75389200 | -0.90725200 |
| C | 3.85055000  | 3.07525600  | -0.11022100 |
| C | 2.54730100  | 2.59641400  | -0.09204800 |
| C | 2.14078500  | 1.72225700  | 0.92750900  |
| C | 3.05567800  | 1.32590900  | 1.91441700  |
| C | 4.35202400  | 1.82323000  | 1.89320900  |
| C | 4.75333300  | 2.69407600  | 0.88155400  |

|    |             |             |             |
|----|-------------|-------------|-------------|
| H  | 4.16267900  | 3.75315900  | -0.90224100 |
| H  | 1.83017000  | 2.88944900  | -0.85864900 |
| H  | 2.73762400  | 0.62790400  | 2.68871500  |
| H  | 5.05608200  | 1.52229600  | 2.66636100  |
| H  | 5.77267800  | 3.07444900  | 0.86402000  |
| C  | 0.79216200  | 1.21843800  | 0.93242400  |
| C  | -0.41997200 | 1.48999600  | 1.06090200  |
| S  | -2.66352700 | 2.29116700  | -0.11874500 |
| O  | -3.33411000 | 3.46029500  | 0.42285500  |
| O  | -1.73028800 | 2.38506400  | -1.22267600 |
| C  | -3.82283700 | 0.99135500  | -0.34261100 |
| C  | -5.12606000 | 1.16122300  | 0.12265000  |
| C  | -3.39628900 | -0.18674600 | -0.95592800 |
| C  | -6.02659600 | 0.11917000  | -0.04498600 |
| H  | -5.42237800 | 2.09168800  | 0.60190600  |
| C  | -4.31775600 | -1.21230400 | -1.10486400 |
| H  | -2.36561700 | -0.29874000 | -1.30077500 |
| C  | -5.63838300 | -1.07588800 | -0.65961700 |
| H  | -7.05037000 | 0.23208500  | 0.30915400  |
| H  | -4.00903000 | -2.14383700 | -1.57834600 |
| C  | -6.62240800 | -2.18588200 | -0.85931200 |
| H  | -7.06391800 | -2.13430400 | -1.86431800 |
| H  | -6.14287100 | -3.16767600 | -0.76857700 |
| H  | -7.44526200 | -2.13156500 | -0.13748800 |
| N  | -1.68930200 | 1.67194900  | 1.22866000  |
| C  | -2.36112400 | 1.54808400  | 2.53270900  |
| H  | -2.60331400 | 2.54301900  | 2.91766400  |
| H  | -3.27459200 | 0.95618900  | 2.40901500  |
| H  | -1.68632300 | 1.02560500  | 3.21327100  |
| Au | 0.80542800  | -1.21059700 | 0.38665400  |
| Cl | -1.08308100 | -1.65968100 | 1.69653700  |
| Cl | 2.02045900  | -3.04068800 | 1.42436100  |

**TS<sub>ii</sub>**

E (M06-D3-CPCM/BS1) = -2713.17067375 au

H (M06-D3-CPCM/BS1) = -2712.768298 au

G (M06-D3-CPCM/BS1) = -2712.869894 au

E (M06-D3-SMD/BS2//M06-D3-CPCM/BS1) = -2714.15336612 au

|   |             |             |             |
|---|-------------|-------------|-------------|
| C | -4.84161100 | -1.43608800 | 0.74392000  |
| C | -4.62875100 | -1.46163300 | 2.11755900  |
| C | -3.33027100 | -1.36853300 | 2.60777500  |
| C | -2.29004500 | -1.24933800 | 1.69928100  |
| C | -3.74425300 | -1.31672900 | -0.10414000 |
| H | -5.84181800 | -1.50387600 | 0.32496400  |

|    |             |             |             |
|----|-------------|-------------|-------------|
| H  | -5.46862900 | -1.55282300 | 2.80216500  |
| H  | -3.10343800 | -1.38164500 | 3.67063300  |
| H  | -3.84829500 | -1.28839500 | -1.18811800 |
| C  | -0.86829900 | -1.12643800 | 2.17190000  |
| O  | 0.07309700  | -1.01915300 | 1.25956600  |
| O  | -0.59954500 | -1.13311000 | 3.35859200  |
| N  | -2.50768000 | -1.22974900 | 0.37882500  |
| C  | -4.16411700 | 2.33565800  | 1.27623800  |
| C  | -2.82427600 | 2.04738900  | 1.05825400  |
| C  | -2.35965100 | 1.84291400  | -0.25097200 |
| C  | -3.25086500 | 1.91877100  | -1.33176500 |
| C  | -4.58790300 | 2.20961200  | -1.09929000 |
| C  | -5.04760900 | 2.41691300  | 0.20071700  |
| H  | -4.52143800 | 2.49609500  | 2.29149200  |
| H  | -2.12275100 | 1.98501000  | 1.88996800  |
| H  | -2.88095000 | 1.74310600  | -2.34023000 |
| H  | -5.27739800 | 2.27406200  | -1.93857700 |
| H  | -6.09753800 | 2.64276800  | 0.37604000  |
| C  | -0.97711400 | 1.53724900  | -0.45503000 |
| C  | 0.22752600  | 1.80630500  | -0.60236800 |
| S  | 2.49138600  | 2.34236500  | 0.66997500  |
| O  | 3.17747400  | 3.58702400  | 0.37121900  |
| O  | 1.56028700  | 2.22932300  | 1.77553000  |
| C  | 3.64264700  | 1.01664400  | 0.65175300  |
| C  | 4.95581700  | 1.27232700  | 0.25822500  |
| C  | 3.21570200  | -0.25532700 | 1.03292300  |
| C  | 5.86312800  | 0.22344700  | 0.26525600  |
| H  | 5.25616300  | 2.27479300  | -0.03801100 |
| C  | 4.14438800  | -1.28514400 | 1.02734100  |
| H  | 2.17978500  | -0.44420000 | 1.31904400  |
| C  | 5.47435600  | -1.06328600 | 0.65317600  |
| H  | 6.89448000  | 0.40405000  | -0.03480300 |
| H  | 3.82932700  | -2.28788300 | 1.31427900  |
| C  | 6.46731800  | -2.18269100 | 0.68739800  |
| H  | 6.88238600  | -2.29972700 | 1.69817300  |
| H  | 6.00328600  | -3.13852700 | 0.41711300  |
| H  | 7.30754600  | -1.99840000 | 0.00834300  |
| N  | 1.50197700  | 2.01990200  | -0.75813500 |
| C  | 2.16972500  | 1.89711700  | -2.06174500 |
| H  | 2.99353300  | 2.61534300  | -2.10858500 |
| H  | 2.54314100  | 0.87330000  | -2.19059500 |
| H  | 1.44300600  | 2.12810400  | -2.84438200 |
| Au | -0.46598600 | -0.91547800 | -0.70567700 |
| Cl | 1.45503600  | -2.25469500 | -1.37426500 |



Cl                    -1.18123000    -0.69911800    -2.92823800

**TS<sub>iii</sub>**

E (M06-D3-CPCM/BS1) = -2713.16917053 au

H (M06-D3-CPCM/BS1) = -2712.766771 au

G (M06-D3-CPCM/BS1) = -2712.867156 au

E (M06-D3-SMD/BS2//M06-D3-CPCM/BS1) = -2714.14850584 au

|   |             |             |             |
|---|-------------|-------------|-------------|
| C | 4.09808200  | -1.55152800 | -1.37445300 |
| C | 3.64305300  | -2.54550600 | -2.23123300 |
| C | 2.32039300  | -2.96807700 | -2.14025200 |
| C | 1.48857100  | -2.38194300 | -1.20579500 |
| C | 3.21642300  | -0.98877600 | -0.46092200 |
| H | 5.12615900  | -1.20219000 | -1.40033200 |
| H | 4.31498000  | -2.99502300 | -2.95809500 |
| H | 1.90652900  | -3.75186200 | -2.76964200 |
| H | 3.51768000  | -0.21564400 | 0.24391800  |
| C | 0.06680700  | -2.84409400 | -1.00352900 |
| O | -0.55483600 | -2.32547600 | 0.00645800  |
| O | -0.41759800 | -3.67596000 | -1.75676800 |
| N | 1.94491300  | -1.39593400 | -0.40534600 |
| C | 3.88139100  | 2.24404500  | -1.94848300 |
| C | 2.57608800  | 1.97402100  | -1.56311600 |
| C | 2.23124400  | 1.99525600  | -0.20181300 |
| C | 3.20635700  | 2.28266600  | 0.76458600  |
| C | 4.50870700  | 2.55598800  | 0.36410900  |
| C | 4.84994600  | 2.53316900  | -0.98720000 |
| H | 4.14584700  | 2.22735000  | -3.00382000 |
| H | 1.80974800  | 1.73989900  | -2.30130200 |
| H | 2.93474300  | 2.26950000  | 1.81794100  |
| H | 5.26413600  | 2.78252800  | 1.11357500  |
| H | 5.87335900  | 2.74126700  | -1.29267400 |
| C | 0.87620200  | 1.68311100  | 0.17429700  |
| C | -0.28798100 | 2.14904800  | 0.13859800  |
| S | -2.46366700 | 2.25387300  | -1.36266500 |
| O | -3.34698800 | 3.40184100  | -1.43789900 |
| O | -1.46727000 | 1.96594600  | -2.37517700 |
| C | -3.36043200 | 0.80966900  | -0.93937700 |
| C | -4.61485200 | 0.93705900  | -0.34273600 |
| C | -2.76759100 | -0.43462600 | -1.15580300 |
| C | -5.28507400 | -0.21767900 | 0.03299600  |
| H | -5.06211100 | 1.91801900  | -0.19642100 |
| C | -3.46226500 | -1.57307200 | -0.77949200 |
| H | -1.78654700 | -0.51031900 | -1.62127400 |
| C | -4.72108800 | -1.48159900 | -0.17542300 |

|    |             |             |             |
|----|-------------|-------------|-------------|
| H  | -6.26972400 | -0.13988600 | 0.49172600  |
| H  | -3.00564400 | -2.54822500 | -0.94316600 |
| C  | -5.43971500 | -2.72140100 | 0.25645900  |
| H  | -5.02098500 | -3.10070200 | 1.19887100  |
| H  | -6.50718800 | -2.53620700 | 0.41981200  |
| H  | -5.33410800 | -3.52234100 | -0.48517300 |
| N  | -1.51208100 | 2.55065800  | 0.11570700  |
| C  | -2.20194300 | 3.18222200  | 1.25263100  |
| H  | -2.53207100 | 4.18288100  | 0.96291700  |
| H  | -3.05941600 | 2.56584900  | 1.54432100  |
| H  | -1.49859600 | 3.23529100  | 2.08572100  |
| Au | 0.52925300  | -0.64569800 | 0.88924100  |
| Cl | -1.25200500 | -0.01899700 | 2.27656100  |
| Cl | 2.25910500  | -0.39474200 | 2.80202700  |

#### TS<sub>iv</sub>

E (M06-D3-CPCM/BS1) = -2713.16618552 au

H (M06-D3-CPCM/BS1) = -2712.763659 au

G (M06-D3-CPCM/BS1) = -2712.862911 au

E (M06-D3-SMD/BS2//M06-D3-CPCM/BS1) = -2714.14810723 au

|   |             |             |             |
|---|-------------|-------------|-------------|
| C | -3.88682700 | -1.14599100 | -2.78417600 |
| C | -2.68995900 | -1.31450200 | -2.10501000 |
| C | -2.69052000 | -1.42813700 | -0.70472400 |
| C | -3.89805500 | -1.36442500 | 0.00295400  |
| C | -5.08976900 | -1.20105500 | -0.69021500 |
| C | -5.08906200 | -1.08860900 | -2.07939900 |
| H | -3.88371400 | -1.05954600 | -3.86890700 |
| H | -1.74311600 | -1.36091600 | -2.64223700 |
| H | -3.88135800 | -1.42745400 | 1.08880000  |
| H | -6.02802000 | -1.15613100 | -0.14072300 |
| H | -6.02700700 | -0.95474100 | -2.61484700 |
| C | -1.42628600 | -1.59407300 | -0.04552700 |
| C | -0.45871400 | -2.33275000 | 0.21917000  |
| S | 1.74673500  | -3.18575900 | -0.89683100 |
| O | 2.59544100  | -4.29330000 | -0.49934200 |
| O | 0.91357600  | -3.22933900 | -2.08330600 |
| C | 2.64848900  | -1.67840600 | -0.86314500 |
| C | 3.86051500  | -1.63303000 | -0.17478200 |
| C | 2.13904100  | -0.56853400 | -1.53551600 |
| C | 4.57905900  | -0.44841300 | -0.17914000 |
| H | 4.23939200  | -2.51774000 | 0.33248600  |
| C | 2.88088800  | 0.60592100  | -1.52805000 |
| H | 1.19570100  | -0.62838000 | -2.07576800 |
| C | 4.10675900  | 0.68109100  | -0.85974000 |

|    |             |             |             |
|----|-------------|-------------|-------------|
| H  | 5.53500800  | -0.39695000 | 0.34072900  |
| H  | 2.50815100  | 1.47676600  | -2.06866800 |
| C  | 4.92129700  | 1.93711800  | -0.87193900 |
| H  | 5.07602900  | 2.31687100  | 0.14764600  |
| H  | 5.91813200  | 1.75288900  | -1.29330900 |
| H  | 4.44489000  | 2.72644500  | -1.46479300 |
| N  | 0.61709500  | -3.02325500 | 0.44539800  |
| C  | 0.95345700  | -3.64175500 | 1.73818800  |
| H  | 0.92631700  | -4.73058800 | 1.64713700  |
| H  | 1.94971800  | -3.31411100 | 2.05140400  |
| H  | 0.21628100  | -3.29875600 | 2.46788600  |
| C  | 2.14850000  | 3.96803900  | -0.02158000 |
| C  | 1.41646100  | 4.64933900  | -0.98766600 |
| C  | 0.16380800  | 4.16982800  | -1.35926100 |
| C  | -0.31329500 | 3.02394800  | -0.74851100 |
| C  | 1.62159500  | 2.80755300  | 0.53589300  |
| H  | 3.12227200  | 4.32327100  | 0.30466700  |
| H  | 1.81508800  | 5.55324500  | -1.44140000 |
| H  | -0.46109900 | 4.66575100  | -2.09769300 |
| H  | 2.14949300  | 2.21804300  | 1.28463700  |
| C  | -1.68022400 | 2.47470600  | -1.03930800 |
| O  | -2.04463400 | 1.42499900  | -0.34037100 |
| O  | -2.40810200 | 2.99385600  | -1.86278100 |
| Au | -0.63248800 | 0.61898900  | 0.88948700  |
| Cl | 1.13138500  | -0.20998600 | 2.19751100  |
| Cl | -2.31129300 | 0.09455600  | 2.78015800  |
| N  | 0.41888500  | 2.36746500  | 0.16570300  |

### iii

E (M06-D3-CPCM/BS1) = -2713.1892791 au

H (M06-D3-CPCM/BS1) = -2712.785237 au

G (M06-D3-CPCM/BS1) = -2712.885953 au

E (M06-D3-SMD/BS2//M06-D3-CPCM/BS1) = -2714.17135705 au

|   |             |             |            |
|---|-------------|-------------|------------|
| C | -4.05991300 | -0.15369000 | 2.91318600 |
| C | -3.81478700 | -1.45589800 | 3.33700800 |
| C | -2.97546500 | -2.26499600 | 2.58599400 |
| C | -2.39507000 | -1.77619400 | 1.42023400 |
| C | -3.45657100 | 0.28960500  | 1.75007700 |
| H | -4.70898900 | 0.51716300  | 3.46797800 |
| H | -4.27543700 | -1.83460800 | 4.24647600 |
| H | -2.74210500 | -3.28773100 | 2.86583800 |
| H | -3.61783700 | 1.29578000  | 1.36927900 |
| C | -1.45371000 | -2.68055800 | 0.59774100 |
| O | -1.22516200 | -3.78839500 | 1.10244100 |

|    |             |             |             |
|----|-------------|-------------|-------------|
| O  | -0.99500900 | -2.18615100 | -0.46340700 |
| Au | -1.86023300 | 0.23684500  | -0.75889200 |
| Cl | -1.03263500 | 1.25932900  | -2.71294500 |
| Cl | -3.91942500 | -0.37340600 | -1.83021600 |
| C  | -0.73283500 | 4.57570700  | 0.71524000  |
| C  | -0.90566200 | 3.26607200  | 0.28461200  |
| C  | 0.01101300  | 2.27489900  | 0.65743800  |
| C  | 1.10029600  | 2.62141300  | 1.47469500  |
| C  | 1.26866600  | 3.92995000  | 1.89812900  |
| C  | 0.35199300  | 4.91044400  | 1.51971400  |
| H  | -1.45084100 | 5.33717000  | 0.41883600  |
| H  | -1.74967300 | 3.01034400  | -0.35468600 |
| H  | 1.81204400  | 1.85554800  | 1.78319700  |
| H  | 2.11592300  | 4.18679600  | 2.53028800  |
| H  | 0.48397800  | 5.93668100  | 1.85641700  |
| C  | -0.14948200 | 0.88887200  | 0.22873500  |
| C  | 0.66474800  | -0.10033700 | 0.40640300  |
| S  | 2.50480800  | -1.50132900 | -0.93718800 |
| O  | 2.51340100  | -2.94900300 | -0.92087900 |
| O  | 1.92736200  | -0.71626500 | -2.00502300 |
| C  | 4.05375900  | -0.85383600 | -0.43457400 |
| C  | 5.01357900  | -1.71332000 | 0.09555200  |
| C  | 4.26759800  | 0.52103600  | -0.55201700 |
| C  | 6.22358800  | -1.17233200 | 0.50773600  |
| H  | 4.81868200  | -2.78088600 | 0.17084500  |
| C  | 5.48173800  | 1.03404600  | -0.12892100 |
| H  | 3.50002500  | 1.16972300  | -0.97143900 |
| C  | 6.47473100  | 0.19895900  | 0.40186600  |
| H  | 6.98983700  | -1.82714900 | 0.91962300  |
| H  | 5.67145800  | 2.10322900  | -0.21232000 |
| C  | 7.78972100  | 0.77236100  | 0.82642400  |
| H  | 8.43279400  | 0.94828200  | -0.04694800 |
| H  | 7.66038300  | 1.73858000  | 1.32860900  |
| H  | 8.32706700  | 0.09742800  | 1.50149500  |
| N  | 1.46752700  | -1.06399900 | 0.51857100  |
| C  | 1.52470900  | -2.00780200 | 1.65203200  |
| H  | 2.57241200  | -2.14801200 | 1.93624800  |
| H  | 0.96884500  | -1.57110900 | 2.48487700  |
| H  | 1.07033000  | -2.95479600 | 1.34344000  |
| N  | -2.64938000 | -0.51464300 | 1.03775500  |

iv

E (M06-D3-CPCM/BS1) = -438.672231293 au

H (M06-D3-CPCM/BS1) = -438.530816 au

G (M06-D3-CPCM/BS1) = -438.57155 au

E (M06-D3-SMD/BS2//M06-D3-CPCM/BS1) = -438.847773279 au

|   |             |             |             |
|---|-------------|-------------|-------------|
| C | -0.83442500 | 0.80867400  | 0.00027100  |
| C | -0.19093500 | -0.47118600 | 0.00022800  |
| C | 1.23539800  | -0.58689000 | 0.00022700  |
| C | 1.92727000  | 0.59298000  | 0.00002500  |
| C | 1.29031200  | 1.87713300  | -0.00018000 |
| C | -0.06756100 | 2.00665100  | -0.00001400 |
| C | -2.16473400 | 0.47692200  | 0.00001200  |
| H | 1.91950700  | 2.76506300  | -0.00048700 |
| H | -0.55019100 | 2.98101100  | -0.00004600 |
| H | -3.08424000 | 1.04847100  | 0.00026100  |
| C | 1.87692500  | -1.93438900 | -0.00003600 |
| H | 1.57209700  | -2.51774900 | 0.87991400  |
| H | 1.57159200  | -2.51737400 | -0.88007500 |
| H | 2.96973800  | -1.85497900 | -0.00030700 |
| N | -1.06421900 | -1.47083600 | -0.00010400 |
| O | -2.29995700 | -0.84832000 | -0.00020000 |
| H | 3.01719300  | 0.55860100  | -0.00014100 |

### TS<sub>iii-v</sub>

E (M06-D3-CPCM/BS1) = -3151.87553508 au

H (M06-D3-CPCM/BS1) = -3151.329051 au

G (M06-D3-CPCM/BS1) = -3151.446092 au

E (M06-D3-SMD/BS2//M06-D3-CPCM/BS1) = -3153.03077892 au

|    |             |             |             |
|----|-------------|-------------|-------------|
| C  | -4.83431200 | 2.21217900  | 0.45370200  |
| C  | -4.44068700 | 2.69633200  | 1.69943000  |
| C  | -3.43502200 | 2.04215700  | 2.39324900  |
| C  | -2.85553200 | 0.89940800  | 1.85168300  |
| C  | -4.21748100 | 1.07957200  | -0.04417500 |
| H  | -5.60586100 | 2.70334500  | -0.13168900 |
| H  | -4.90717200 | 3.58672400  | 2.11485100  |
| H  | -3.06316100 | 2.39882100  | 3.34981500  |
| H  | -4.47247600 | 0.66451600  | -1.01680100 |
| C  | -1.70825000 | 0.17890700  | 2.56027400  |
| O  | -0.91768900 | 0.91994000  | 3.17051200  |
| O  | -1.68436800 | -1.06707700 | 2.41218800  |
| Au | -2.30374000 | -1.20925800 | -0.23642800 |
| Cl | -1.29755400 | -3.01396000 | -1.35330800 |
| Cl | -4.38644700 | -2.42913800 | 0.00436500  |
| C  | -1.70311000 | 2.86982600  | -2.63667900 |
| C  | -1.35843300 | 1.58552400  | -2.23173600 |
| C  | -0.92498300 | 1.35988500  | -0.92003300 |
| C  | -0.86637500 | 2.42436900  | -0.01090600 |

|   |             |             |             |
|---|-------------|-------------|-------------|
| C | -1.22917000 | 3.70193900  | -0.42051700 |
| C | -1.64150500 | 3.92814500  | -1.73205900 |
| H | -2.02851700 | 3.04297200  | -3.66044800 |
| H | -1.41418800 | 0.74722500  | -2.92667800 |
| H | -0.57046100 | 2.23783200  | 1.02379300  |
| H | -1.18770800 | 4.52468700  | 0.29133900  |
| H | -1.92297500 | 4.93057200  | -2.04877400 |
| C | -0.60808700 | -0.00475400 | -0.49448200 |
| C | 0.52762700  | -0.55585200 | -0.16182000 |
| S | 2.31722400  | -2.45672300 | -0.67593300 |
| O | 2.17215400  | -3.82884800 | -0.22525000 |
| O | 2.02049900  | -2.04233200 | -2.03145700 |
| C | 3.88269700  | -1.83256800 | -0.16345700 |
| C | 4.48647100  | -2.36192800 | 0.97790500  |
| C | 4.47632900  | -0.80419900 | -0.89447300 |
| C | 5.69213300  | -1.82301500 | 1.40307900  |
| H | 4.02928600  | -3.19151900 | 1.51328300  |
| C | 5.68406600  | -0.28577900 | -0.45260400 |
| H | 4.00453900  | -0.43161700 | -1.79955100 |
| C | 6.30072800  | -0.77426900 | 0.70466100  |
| H | 6.17694000  | -2.22826200 | 2.29015500  |
| H | 6.16485700  | 0.51104400  | -1.01862600 |
| C | 7.58429400  | -0.17892300 | 1.19230100  |
| H | 8.18787500  | 0.20990100  | 0.36403400  |
| H | 7.38575000  | 0.66134700  | 1.87214700  |
| H | 8.18290600  | -0.91061800 | 1.74692100  |
| N | 1.21078900  | -1.52737500 | 0.35821000  |
| C | 1.22968300  | -1.85035500 | 1.79767000  |
| H | 2.13929900  | -1.45736600 | 2.26622500  |
| H | 0.32528500  | -1.43029300 | 2.25588700  |
| H | 1.19925000  | -2.94031200 | 1.88971300  |
| N | -3.26480200 | 0.44287400  | 0.65816400  |
| C | 2.25416600  | 3.07141200  | -1.32186100 |
| C | 2.19845900  | 2.10930600  | -0.26839200 |
| C | 2.42904900  | 2.46886000  | 1.08856500  |
| C | 2.66862000  | 3.80313100  | 1.30458700  |
| C | 2.70503400  | 4.77933600  | 0.26225200  |
| C | 2.51455300  | 4.43828400  | -1.04644300 |
| C | 1.98968500  | 2.32442000  | -2.44500200 |
| H | 2.90447800  | 5.81436600  | 0.53028900  |
| H | 2.55899100  | 5.17191200  | -1.84682000 |
| H | 1.91852900  | 2.55682200  | -3.50044600 |
| C | 2.40986200  | 1.43746900  | 2.16667500  |
| H | 1.39204500  | 1.05623400  | 2.35649200  |

|   |            |            |             |
|---|------------|------------|-------------|
| H | 3.04667700 | 0.58166700 | 1.89247000  |
| H | 2.78494900 | 1.85064300 | 3.10951300  |
| N | 1.93159600 | 0.89080100 | -0.75212400 |
| O | 1.79212200 | 1.05565500 | -2.11812100 |
| H | 2.85091700 | 4.13529200 | 2.32657800  |

**v**

E (M06-D3-CPCM/BS1) = -3151.90623211 au

H (M06-D3-CPCM/BS1) = -3151.356901 au

G (M06-D3-CPCM/BS1) = -3151.471344 au

E (M06-D3-SMD/BS2//M06-D3-CPCM/BS1) = -3153.0623124 au

|    |             |             |             |
|----|-------------|-------------|-------------|
| C  | -5.01207200 | 2.31213800  | 0.20234000  |
| C  | -4.61839400 | 2.99347200  | 1.35201400  |
| C  | -3.57696500 | 2.48669300  | 2.11277100  |
| C  | -2.96260100 | 1.29639900  | 1.73611500  |
| C  | -4.35498100 | 1.14282400  | -0.13345800 |
| H  | -5.81385500 | 2.67723900  | -0.43264800 |
| H  | -5.11420700 | 3.91765700  | 1.64030500  |
| H  | -3.20601800 | 2.99194900  | 2.99997700  |
| H  | -4.61224500 | 0.57557400  | -1.02509500 |
| C  | -1.80281700 | 0.72399800  | 2.54692500  |
| O  | -1.06161200 | 1.57140600  | 3.07783400  |
| O  | -1.73371800 | -0.52732700 | 2.56221500  |
| Au | -2.36890500 | -1.07636100 | -0.11195400 |
| Cl | -1.43616100 | -2.86199000 | -1.33405100 |
| Cl | -4.41921700 | -2.32798900 | 0.34009800  |
| C  | -1.91956800 | 2.70472600  | -2.89428200 |
| C  | -1.59558200 | 1.46584300  | -2.35696400 |
| C  | -1.04968700 | 1.37694900  | -1.06921100 |
| C  | -0.85020100 | 2.54430400  | -0.32139000 |
| C  | -1.17852200 | 3.78149900  | -0.86622700 |
| C  | -1.71043500 | 3.86503700  | -2.15071700 |
| H  | -2.33635200 | 2.76572400  | -3.89771600 |
| H  | -1.75199600 | 0.55173900  | -2.93147800 |
| H  | -0.47567100 | 2.47174000  | 0.70210400  |
| H  | -1.02522800 | 4.68467100  | -0.27842300 |
| H  | -1.96788300 | 4.83519500  | -2.57133300 |
| C  | -0.70373200 | 0.05452700  | -0.52673100 |
| C  | 0.57083200  | -0.32531100 | -0.32413400 |
| S  | 2.26697800  | -2.35044700 | -0.67832400 |
| O  | 2.18253400  | -3.72422800 | -0.20819400 |
| O  | 2.06307400  | -2.00927100 | -2.07911900 |
| C  | 3.82081300  | -1.66872100 | -0.16293300 |
| C  | 4.28506400  | -1.93242900 | 1.12518700  |

|   |             |             |             |
|---|-------------|-------------|-------------|
| C | 4.52553600  | -0.83488800 | -1.02613200 |
| C | 5.44778900  | -1.31199900 | 1.55954700  |
| H | 3.74990500  | -2.61989200 | 1.77851400  |
| C | 5.69166400  | -0.22859100 | -0.57547300 |
| H | 4.16727800  | -0.67615700 | -2.04170000 |
| C | 6.15685400  | -0.43953400 | 0.72545100  |
| H | 5.81711300  | -1.50779000 | 2.56558900  |
| H | 6.25061400  | 0.42472400  | -1.24519900 |
| C | 7.38035500  | 0.26599100  | 1.22258600  |
| H | 8.06951800  | 0.50377100  | 0.40396600  |
| H | 7.11000300  | 1.21564700  | 1.70655800  |
| H | 7.91783600  | -0.33348500 | 1.96660100  |
| N | 1.13184300  | -1.46832700 | 0.25052300  |
| C | 0.52209600  | -2.17035800 | 1.38575600  |
| H | 1.31156200  | -2.57580900 | 2.02792500  |
| H | -0.07246100 | -1.44868900 | 1.95735300  |
| H | -0.12609800 | -2.98893900 | 1.05168700  |
| N | -3.36629500 | 0.65079800  | 0.63327400  |
| C | 2.99412600  | 2.30290900  | -1.15726700 |
| C | 2.42599000  | 1.47407300  | -0.14605200 |
| C | 2.76756600  | 1.60840000  | 1.21998400  |
| C | 3.72790800  | 2.57085800  | 1.46292300  |
| C | 4.32655700  | 3.38963600  | 0.46692800  |
| C | 3.96746700  | 3.28142900  | -0.84654000 |
| C | 2.39710900  | 1.88964800  | -2.32845700 |
| H | 5.07516700  | 4.11617000  | 0.77195800  |
| H | 4.40089800  | 3.90064000  | -1.62608800 |
| H | 2.48787600  | 2.20039100  | -3.36213400 |
| C | 2.15780000  | 0.79927300  | 2.31789900  |
| H | 1.07754600  | 0.98926800  | 2.43359900  |
| H | 2.29307100  | -0.27482000 | 2.14200700  |
| H | 2.63764400  | 1.04755900  | 3.27064500  |
| N | 1.57757700  | 0.61408500  | -0.76316100 |
| O | 1.56540700  | 0.89220900  | -2.10970100 |
| H | 4.04206400  | 2.71424800  | 2.49634100  |

**TS<sub>v-vi</sub>**

E (M06-D3-CPCM/BS1) = -3151.8806838 au

H (M06-D3-CPCM/BS1) = -3151.334648 au

G (M06-D3-CPCM/BS1) = -3151.454329 au

E (M06-D3-SMD/BS2//M06-D3-CPCM/BS1) = -3153.03084324 au

|   |             |             |            |
|---|-------------|-------------|------------|
| C | -4.59231600 | 0.17998600  | 2.69423600 |
| C | -4.58734100 | -1.05731500 | 3.32971300 |
| C | -3.84771400 | -2.09300200 | 2.78006000 |



|    |             |             |             |
|----|-------------|-------------|-------------|
| C  | -3.11531600 | -1.88935900 | 1.61469400  |
| C  | -3.84337500 | 0.33378200  | 1.54132600  |
| H  | -5.16808300 | 1.01886600  | 3.07405200  |
| H  | -5.16289800 | -1.21232500 | 4.23956100  |
| H  | -3.81285700 | -3.08607200 | 3.21753900  |
| H  | -3.82097400 | 1.27861800  | 1.00074800  |
| C  | -2.33247500 | -3.06473400 | 0.99605400  |
| O  | -2.42260600 | -4.13227100 | 1.61711800  |
| O  | -1.69305700 | -2.81011700 | -0.05564000 |
| Au | -2.11869800 | -0.36784700 | -0.81624500 |
| Cl | -1.10039300 | 0.20435900  | -2.87089400 |
| Cl | -4.02593800 | -1.42825100 | -1.93530100 |
| C  | -3.00570700 | 4.00764400  | -0.08878600 |
| C  | -2.33013000 | 2.87068200  | -0.50909600 |
| C  | -1.46495700 | 2.19958800  | 0.37414800  |
| C  | -1.31703400 | 2.67724400  | 1.68875800  |
| C  | -2.01909200 | 3.79796600  | 2.10689900  |
| C  | -2.86011000 | 4.46740100  | 1.21963500  |
| H  | -3.65701000 | 4.53325100  | -0.78349700 |
| H  | -2.44518300 | 2.50330000  | -1.52845200 |
| H  | -0.67971300 | 2.13442700  | 2.38535700  |
| H  | -1.91246200 | 4.14954600  | 3.13077100  |
| H  | -3.40802600 | 5.34739800  | 1.54978600  |
| C  | -0.79552100 | 0.97101500  | -0.01237900 |
| C  | 0.57209800  | 0.80870100  | 0.08363600  |
| S  | 2.09674000  | -1.01352500 | -1.22827700 |
| O  | 1.39434600  | -2.15540400 | -1.79657700 |
| O  | 2.39371600  | 0.15776500  | -2.04218400 |
| C  | 3.59198000  | -1.60767400 | -0.48825400 |
| C  | 3.68575800  | -2.94059800 | -0.09402800 |
| C  | 4.64998800  | -0.72161000 | -0.29812200 |
| C  | 4.85488000  | -3.37959900 | 0.51339200  |
| H  | 2.85520900  | -3.62246900 | -0.26611500 |
| C  | 5.80965200  | -1.17956600 | 0.31038600  |
| H  | 4.57134800  | 0.30966500  | -0.63839800 |
| C  | 5.92946000  | -2.51044800 | 0.72494900  |
| H  | 4.93764200  | -4.41899600 | 0.82918500  |
| H  | 6.64257300  | -0.49309000 | 0.46384400  |
| C  | 7.19587100  | -3.00235200 | 1.35508100  |
| H  | 7.71644700  | -2.20064700 | 1.89191900  |
| H  | 7.00383000  | -3.82260900 | 2.05659600  |
| H  | 7.88737000  | -3.38418600 | 0.59114000  |
| N  | 1.24268100  | -0.43272000 | 0.11751000  |
| C  | 0.80474100  | -1.45692400 | 1.07764500  |

|   |             |             |             |
|---|-------------|-------------|-------------|
| H | 1.68341500  | -1.91287200 | 1.55310500  |
| H | 0.21133700  | -0.95895700 | 1.85330200  |
| H | 0.18500400  | -2.22178600 | 0.59831600  |
| N | -3.11828200 | -0.67709100 | 1.03574700  |
| C | 3.30721500  | 2.89603400  | -0.57164800 |
| C | 2.61130500  | 2.15464900  | 0.40812000  |
| C | 3.24775800  | 1.78805000  | 1.60787900  |
| C | 4.57682600  | 2.18415400  | 1.73090600  |
| C | 5.27962700  | 2.90321600  | 0.75083400  |
| C | 4.64477400  | 3.28018600  | -0.41262300 |
| C | 2.40674600  | 3.17149800  | -1.62470300 |
| H | 6.32007200  | 3.16565200  | 0.92194800  |
| H | 5.15002700  | 3.84889200  | -1.18920200 |
| H | 2.61769300  | 3.80188100  | -2.49470900 |
| C | 2.56703800  | 1.03353900  | 2.70440000  |
| H | 1.52004400  | 1.33608600  | 2.82651900  |
| H | 2.58079600  | -0.04673700 | 2.50768700  |
| H | 3.07677200  | 1.20131000  | 3.65889800  |
| N | 1.27437500  | 1.97415300  | 0.11769400  |
| O | 1.25885900  | 2.68207500  | -1.50210700 |
| H | 5.09529700  | 1.91461300  | 2.65096600  |

**vi**

E (M06-D3-CPCM/BS1) = -3151.92141169 au

H (M06-D3-CPCM/BS1) = -3151.373597 au

G (M06-D3-CPCM/BS1) = -3151.492578 au

E (M06-D3-SMD/BS2//M06-D3-CPCM/BS1) = -3153.07528497 au

|    |             |             |             |
|----|-------------|-------------|-------------|
| C  | -2.39093700 | -3.56093200 | 2.42059300  |
| C  | -2.13190600 | -4.57071100 | 1.49736300  |
| C  | -1.89311000 | -4.23249700 | 0.17401900  |
| C  | -1.89759100 | -2.89571500 | -0.21321100 |
| C  | -2.39838000 | -2.24877800 | 1.98358000  |
| H  | -2.59004200 | -3.77810700 | 3.46576800  |
| H  | -2.12138500 | -5.61212700 | 1.81050700  |
| H  | -1.69536900 | -4.97183200 | -0.59636200 |
| H  | -2.60597000 | -1.42291000 | 2.66151100  |
| C  | -1.60108500 | -2.51728300 | -1.67864000 |
| O  | -1.55379400 | -3.47181400 | -2.46199400 |
| O  | -1.43154500 | -1.29073800 | -1.89582500 |
| Au | -2.30134200 | 0.08716000  | 0.07713500  |
| Cl | -2.61948800 | 2.40004900  | -0.29219600 |
| Cl | -4.56876700 | -0.40877100 | -0.56248700 |
| C  | -0.99950300 | 2.12187700  | 4.03766800  |
| C  | -1.26130600 | 1.59607700  | 2.79418400  |

|   |             |             |             |
|---|-------------|-------------|-------------|
| C | -0.19251000 | 1.13186700  | 1.96739700  |
| C | 1.14538100  | 1.22635400  | 2.46228800  |
| C | 1.39159600  | 1.75367700  | 3.70923800  |
| C | 0.32294600  | 2.20188000  | 4.49310400  |
| H | -1.81310300 | 2.47831800  | 4.66301400  |
| H | -2.28366900 | 1.54307300  | 2.42476400  |
| H | 1.97416500  | 0.89182000  | 1.84144900  |
| H | 2.41039400  | 1.82334900  | 4.08040200  |
| H | 0.52246800  | 2.62262000  | 5.47657300  |
| C | -0.42241200 | 0.51270200  | 0.73546200  |
| C | 0.70339500  | 0.21051500  | -0.18148000 |
| S | 2.24014900  | -1.70724900 | -1.39824000 |
| O | 1.95172900  | -3.13245000 | -1.41536900 |
| O | 2.08098100  | -0.90989100 | -2.59745800 |
| C | 3.83936800  | -1.45828800 | -0.68952500 |
| C | 4.60490300  | -2.56070300 | -0.32330300 |
| C | 4.28552500  | -0.15307000 | -0.48793300 |
| C | 5.85421500  | -2.34233600 | 0.24544300  |
| H | 4.22522200  | -3.56767700 | -0.48101700 |
| C | 5.52794800  | 0.03956000  | 0.09512100  |
| H | 3.65869800  | 0.69831000  | -0.75023700 |
| C | 6.33263900  | -1.04726800 | 0.46059100  |
| H | 6.46760700  | -3.19463200 | 0.53544900  |
| H | 5.88120900  | 1.05479000  | 0.27562900  |
| C | 7.68560900  | -0.81782500 | 1.06012700  |
| H | 8.42157800  | -0.57946300 | 0.27979300  |
| H | 7.67520900  | 0.02768000  | 1.75880400  |
| H | 8.04761100  | -1.70399300 | 1.59369100  |
| N | 1.19935300  | -1.07972200 | -0.16797700 |
| C | 1.08046100  | -1.95808600 | 1.00051600  |
| H | 2.05771100  | -2.08106400 | 1.48766500  |
| H | 0.39505900  | -1.51505600 | 1.72680200  |
| H | 0.69363300  | -2.93686600 | 0.70389100  |
| N | -2.14289200 | -1.94461800 | 0.69886300  |
| C | 1.33929700  | 3.54862100  | -0.57408700 |
| C | 0.79915300  | 2.42578400  | -1.24998300 |
| C | -0.02410700 | 2.62506800  | -2.37759600 |
| C | -0.37546300 | 3.92880700  | -2.72160300 |
| C | 0.06620700  | 5.03622400  | -2.00261700 |
| C | 0.93389700  | 4.83787000  | -0.94387900 |
| C | 2.42496500  | 3.48277500  | 0.40344900  |
| H | -0.23868900 | 6.03918300  | -2.29153000 |
| H | 1.34656200  | 5.68782000  | -0.39991500 |
| H | 2.66236400  | 4.47397600  | 0.85525200  |

|   |             |            |             |
|---|-------------|------------|-------------|
| C | -0.51792400 | 1.46713200 | -3.18163500 |
| H | 0.28902100  | 0.75410500 | -3.39420300 |
| H | -1.29037700 | 0.89284000 | -2.65181300 |
| H | -0.94644500 | 1.81293400 | -4.12939400 |
| N | 1.16866900  | 1.13388000 | -0.92020000 |
| O | 3.08786200  | 2.50529000 | 0.70614500  |
| H | -1.02488900 | 4.07176200 | -3.58542800 |

**TS<sub>vi-vii</sub>**

E (M06-D3-CPCM/BS1) = -3151.91569182 au

H (M06-D3-CPCM/BS1) = -3151.369193 au

G (M06-D3-CPCM/BS1) = -3151.485008 au

E (M06-D3-SMD/BS2//M06-D3-CPCM/BS1) = -3153.06860366 au

|    |             |             |             |
|----|-------------|-------------|-------------|
| C  | 1.35267200  | 1.76803500  | 3.50913800  |
| C  | 0.70167700  | 0.91468200  | 4.39733000  |
| C  | 0.46027100  | -0.39680400 | 4.01913000  |
| C  | 0.88372400  | -0.84728000 | 2.77288100  |
| C  | 1.72318000  | 1.28159700  | 2.26937400  |
| H  | 1.57504800  | 2.80020300  | 3.76509600  |
| H  | 0.39086500  | 1.27299400  | 5.37586700  |
| H  | -0.04823800 | -1.10591600 | 4.66635600  |
| H  | 2.23879700  | 1.89936900  | 1.53726900  |
| C  | 0.71053300  | -2.31864100 | 2.37725100  |
| O  | -0.32322100 | -2.85987000 | 2.79196800  |
| O  | 1.64905600  | -2.78135500 | 1.68146800  |
| Au | 2.13694000  | -0.71168100 | 0.05726900  |
| Cl | 3.01465300  | -1.62992200 | -1.92867300 |
| Cl | 4.37480800  | -0.50949900 | 0.93362000  |
| C  | -0.74343400 | -4.22540700 | -1.13491000 |
| C  | -0.01000500 | -3.09954400 | -0.80176800 |
| C  | -0.50166100 | -1.80967300 | -1.11466600 |
| C  | -1.72018200 | -1.70456700 | -1.84347600 |
| C  | -2.42694700 | -2.83395100 | -2.19130000 |
| C  | -1.94643200 | -4.09647200 | -1.82502800 |
| H  | -0.37272300 | -5.20980500 | -0.86112300 |
| H  | 0.90965500  | -3.20488600 | -0.22986200 |
| H  | -2.06183400 | -0.72586400 | -2.16768600 |
| H  | -3.35052500 | -2.74312300 | -2.75848400 |
| H  | -2.51231800 | -4.98597600 | -2.09491200 |
| C  | 0.21028400  | -0.63347100 | -0.74091200 |
| C  | -0.49667900 | 0.66633100  | -0.48787400 |
| S  | -2.85324200 | 1.87862500  | -0.30662600 |
| O  | -2.68450000 | 2.86939800  | 0.74939200  |
| O  | -2.66792500 | 2.22729000  | -1.70751900 |

|   |             |             |             |
|---|-------------|-------------|-------------|
| C | -4.43328400 | 1.10875000  | -0.11214200 |
| C | -5.16455100 | 1.32992500  | 1.05061300  |
| C | -4.92309000 | 0.30239300  | -1.13938600 |
| C | -6.40751900 | 0.72357100  | 1.18459600  |
| H | -4.76103800 | 1.96552900  | 1.83617200  |
| C | -6.16298800 | -0.29655200 | -0.98373700 |
| H | -4.34858100 | 0.16117000  | -2.05304700 |
| C | -6.92178700 | -0.09575900 | 0.17663500  |
| H | -6.98971000 | 0.88735900  | 2.09046800  |
| H | -6.55782700 | -0.93077900 | -1.77692600 |
| C | -8.26784500 | -0.73635200 | 0.31552000  |
| H | -9.00841400 | -0.22680500 | -0.31607000 |
| H | -8.24448400 | -1.78568200 | -0.00368900 |
| H | -8.62997600 | -0.69741300 | 1.34881000  |
| N | -1.82041500 | 0.52257900  | -0.02083400 |
| C | -2.00317100 | -0.12390700 | 1.28647400  |
| H | -3.05664000 | -0.38473000 | 1.42151500  |
| H | -1.43317600 | -1.05880100 | 1.32806500  |
| H | -1.67664300 | 0.53938700  | 2.10198500  |
| N | 1.47594800  | 0.00666000  | 1.92123800  |
| C | 1.91009200  | 1.74033100  | -2.20466400 |
| C | 1.20400500  | 2.27102400  | -1.09507300 |
| C | 1.71605100  | 3.42138100  | -0.45053400 |
| C | 2.97868600  | 3.88562500  | -0.81245200 |
| C | 3.70416900  | 3.32218400  | -1.86286400 |
| C | 3.13788400  | 2.29444200  | -2.59266000 |
| C | 1.34971800  | 0.73028300  | -3.07620900 |
| H | 4.67929000  | 3.72024400  | -2.13135700 |
| H | 3.64410100  | 1.88469900  | -3.46654400 |
| H | 1.76181800  | 0.69896000  | -4.10284600 |
| C | 0.89836200  | 4.15039700  | 0.57259500  |
| H | 0.02350700  | 4.61371600  | 0.09526500  |
| H | 0.49532900  | 3.49196500  | 1.35078700  |
| H | 1.48786200  | 4.94094500  | 1.04996400  |
| N | -0.02182100 | 1.84481100  | -0.61423000 |
| O | 0.44705500  | -0.05520500 | -2.79075000 |
| H | 3.38854300  | 4.74233700  | -0.27843000 |

**vii**

E (M06-D3-CPCM/BS1) = -3151.93603726 au

H (M06-D3-CPCM/BS1) = -3151.389368 au

G (M06-D3-CPCM/BS1) = -3151.501422 au

E (M06-D3-SMD/BS2//M06-D3-CPCM/BS1) = -3153.08718236 au

|   |            |            |            |
|---|------------|------------|------------|
| C | 0.11712000 | 0.69502700 | 3.61811000 |
|---|------------|------------|------------|

|    |             |             |             |
|----|-------------|-------------|-------------|
| C  | -0.34021400 | -0.44882900 | 4.26262400  |
| C  | -0.13180800 | -1.68322900 | 3.66561800  |
| C  | 0.50858100  | -1.76917400 | 2.43468800  |
| C  | 0.74443600  | 0.55724200  | 2.39298100  |
| H  | -0.00151400 | 1.68441500  | 4.05052100  |
| H  | -0.84126100 | -0.37776700 | 5.22522400  |
| H  | -0.44367800 | -2.61786100 | 4.12194200  |
| H  | 1.13379500  | 1.41753200  | 1.85685800  |
| C  | 0.76584600  | -3.15958500 | 1.81760800  |
| O  | 0.33161800  | -4.11086500 | 2.47793700  |
| O  | 1.38881900  | -3.16595500 | 0.72629000  |
| Au | 2.05606200  | -0.77966900 | 0.03009100  |
| Cl | 3.52231600  | -0.96442300 | -1.80800300 |
| Cl | 3.94901000  | -1.05908800 | 1.55960900  |
| C  | -0.81422300 | -3.57129600 | -2.53880500 |
| C  | -0.02739200 | -2.62340900 | -1.88643000 |
| C  | -0.35044100 | -1.27231200 | -1.97681800 |
| C  | -1.43751200 | -0.87721200 | -2.77216000 |
| C  | -2.21853000 | -1.82413100 | -3.41747100 |
| C  | -1.91155100 | -3.17875300 | -3.29483400 |
| H  | -0.56072100 | -4.62571100 | -2.44935200 |
| H  | 0.80718800  | -2.94895200 | -1.27021200 |
| H  | -1.67530300 | 0.18146800  | -2.88080600 |
| H  | -3.06664000 | -1.50347700 | -4.01973500 |
| H  | -2.52559200 | -3.92438300 | -3.79637400 |
| C  | 0.45428400  | -0.17213300 | -1.32846400 |
| C  | -0.32900400 | 0.88276100  | -0.56607400 |
| S  | -2.63180400 | 1.89106700  | 0.33242900  |
| O  | -2.35377400 | 2.20022100  | 1.72818300  |
| O  | -2.53934700 | 2.90752300  | -0.70184800 |
| C  | -4.20493700 | 1.10204600  | 0.20515100  |
| C  | -4.90353400 | 0.76652800  | 1.35946900  |
| C  | -4.71146000 | 0.82905600  | -1.06601800 |
| C  | -6.13890300 | 0.14354800  | 1.23224100  |
| H  | -4.48181500 | 0.98811500  | 2.33772200  |
| C  | -5.94011000 | 0.19774500  | -1.16920700 |
| H  | -4.14763700 | 1.10425900  | -1.95616300 |
| C  | -6.67139000 | -0.15074100 | -0.02544200 |
| H  | -6.69918400 | -0.12535600 | 2.12670500  |
| H  | -6.34786600 | -0.03071800 | -2.15331800 |
| C  | -8.00855400 | -0.81027300 | -0.15935600 |
| H  | -8.77915800 | -0.07439500 | -0.42743700 |
| H  | -8.00169300 | -1.56899500 | -0.95135300 |
| H  | -8.31943700 | -1.28826700 | 0.77620100  |

|   |             |             |             |
|---|-------------|-------------|-------------|
| N | -1.60616400 | 0.56001000  | -0.15760100 |
| C | -1.98814000 | -0.75312200 | 0.38648700  |
| H | -2.81774100 | -1.19118500 | -0.17833100 |
| H | -1.13804800 | -1.43364300 | 0.34072000  |
| H | -2.26922700 | -0.63947600 | 1.44243400  |
| N | 0.90210000  | -0.64240800 | 1.80974900  |
| C | 2.19625600  | 2.36585500  | -1.59126000 |
| C | 1.28755300  | 2.68300100  | -0.53470600 |
| C | 1.58491700  | 3.80004500  | 0.28385500  |
| C | 2.77746400  | 4.48269100  | 0.07855200  |
| C | 3.68031900  | 4.15492100  | -0.94558200 |
| C | 3.37064400  | 3.13097800  | -1.80266400 |
| C | 1.90179200  | 1.40391400  | -2.55913300 |
| H | 4.59203100  | 4.73162900  | -1.07385800 |
| H | 4.01994400  | 2.87644100  | -2.63881400 |
| H | 2.40287000  | 1.43969100  | -3.52932500 |
| C | 0.60955300  | 4.25439600  | 1.32407600  |
| H | -0.37208100 | 4.44946500  | 0.87419600  |
| H | 0.43643000  | 3.49648900  | 2.09829400  |
| H | 0.96421200  | 5.16695500  | 1.81438300  |
| N | 0.10408100  | 2.06014900  | -0.26187300 |
| O | 1.01899300  | 0.47442000  | -2.50972300 |
| H | 3.00257100  | 5.32987800  | 0.72563000  |

### TS<sub>vi-ix</sub>

E (M06-D3-CPCM/BS1) = -3151.90341325 au

H (M06-D3-CPCM/BS1) = -3151.357196 au

G (M06-D3-CPCM/BS1) = -3151.471857 au

E (M06-D3-SMD/BS2//M06-D3-CPCM/BS1) = -3153.05341021 au

|    |             |             |             |
|----|-------------|-------------|-------------|
| C  | -0.99662600 | 2.98921700  | -3.14744400 |
| C  | -1.06388800 | 4.08732600  | -2.29355600 |
| C  | -1.44293000 | 3.89414900  | -0.97403100 |
| C  | -1.74862100 | 2.61530500  | -0.51810700 |
| C  | -1.28134000 | 1.73595100  | -2.63758100 |
| H  | -0.72356300 | 3.09191400  | -4.19342700 |
| H  | -0.83440900 | 5.08474400  | -2.66121200 |
| H  | -1.53713300 | 4.71032000  | -0.26405700 |
| H  | -1.23546200 | 0.84217300  | -3.25745500 |
| C  | -2.29773600 | 2.41539600  | 0.90703600  |
| O  | -2.22587300 | 3.41265500  | 1.63940700  |
| O  | -2.77376600 | 1.28061800  | 1.15126300  |
| Au | -2.16245400 | -0.38205700 | -0.70552700 |
| Cl | -2.87129000 | -2.61296200 | -0.38615800 |
| Cl | -4.32114000 | 0.10824100  | -1.68942300 |

|   |             |             |             |
|---|-------------|-------------|-------------|
| C | 0.68919100  | -3.06525200 | -3.04307900 |
| C | -0.04056400 | -2.28306200 | -2.16377400 |
| C | 0.57742100  | -1.64028000 | -1.06413600 |
| C | 1.97405800  | -1.84028100 | -0.90098400 |
| C | 2.69529200  | -2.62927400 | -1.77586400 |
| C | 2.05670800  | -3.24620400 | -2.85199000 |
| H | 0.18600300  | -3.53824800 | -3.88280200 |
| H | -1.10707400 | -2.16364400 | -2.33404700 |
| H | 2.49911800  | -1.36487600 | -0.07883400 |
| H | 3.76468300  | -2.75837000 | -1.62232600 |
| H | 2.62699700  | -3.86287300 | -3.54342400 |
| C | -0.16849600 | -0.81364000 | -0.13364000 |
| C | 0.50110600  | 0.25438500  | 0.66139300  |
| S | 2.76634900  | 1.74102900  | 1.11351000  |
| O | 2.76942900  | 3.13275300  | 0.69285600  |
| O | 2.55752300  | 1.36645100  | 2.49557400  |
| C | 4.23040100  | 0.94754600  | 0.52119200  |
| C | 5.02671600  | 1.58887100  | -0.42385500 |
| C | 4.55995400  | -0.31122000 | 1.02627900  |
| C | 6.17400800  | 0.94852500  | -0.87378100 |
| H | 4.75132000  | 2.57375200  | -0.79571200 |
| C | 5.70846500  | -0.93214200 | 0.55797200  |
| H | 3.92295600  | -0.79749600 | 1.76544600  |
| C | 6.53097300  | -0.31426700 | -0.39233000 |
| H | 6.80638100  | 1.43789500  | -1.61339700 |
| H | 5.97978700  | -1.91584200 | 0.93968800  |
| C | 7.78372400  | -0.98654400 | -0.86090200 |
| H | 8.61311500  | -0.78376900 | -0.16915100 |
| H | 7.66187300  | -2.07523400 | -0.90688000 |
| H | 8.08874200  | -0.62795000 | -1.85054400 |
| N | 1.53829700  | 0.97275000  | 0.12194000  |
| C | 1.72699600  | 1.23008000  | -1.30706100 |
| H | 2.66775300  | 0.79633700  | -1.66834300 |
| H | 0.91226100  | 0.78122800  | -1.87342300 |
| H | 1.72725000  | 2.31191200  | -1.48147900 |
| N | -1.62351400 | 1.56916600  | -1.34707900 |
| C | -0.49522200 | -1.78012700 | 1.95680200  |
| C | -0.63875800 | -0.42264100 | 2.44165800  |
| C | -1.56879200 | -0.11358800 | 3.46917400  |
| C | -2.47624700 | -1.10058000 | 3.80038100  |
| C | -2.45965300 | -2.38529200 | 3.21305800  |
| C | -1.47814800 | -2.73499000 | 2.31890100  |
| C | 0.84829900  | -2.40146500 | 1.82208000  |
| H | -3.18712000 | -3.12552300 | 3.53810600  |



|   |             |             |            |
|---|-------------|-------------|------------|
| H | -1.37347400 | -3.76301000 | 1.97726700 |
| H | 0.80512100  | -3.42224000 | 1.38019700 |
| C | -1.58336500 | 1.23496900  | 4.10511600 |
| H | -0.56467300 | 1.55360600  | 4.36061000 |
| H | -1.99669400 | 1.99032400  | 3.42169500 |
| H | -2.18683700 | 1.21865600  | 5.01977300 |
| N | 0.08502000  | 0.55038500  | 1.87155200 |
| O | 1.89218400  | -1.90501900 | 2.18227700 |
| H | -3.23552400 | -0.87848500 | 4.54960900 |

**ix**

E (M06-D3-CPCM/BS1) = -3151.94162062 au

H (M06-D3-CPCM/BS1) = -3151.395214 au

G (M06-D3-CPCM/BS1) = -3151.508921 au

E (M06-D3-SMD/BS2//M06-D3-CPCM/BS1) = -3153.09258636 au

|    |             |             |             |
|----|-------------|-------------|-------------|
| C  | 3.60343100  | 3.18284400  | -1.08157800 |
| C  | 4.63653200  | 3.18731700  | -0.15065600 |
| C  | 4.82862600  | 2.06552200  | 0.64060500  |
| C  | 3.97592200  | 0.97314500  | 0.52371900  |
| C  | 2.79869100  | 2.06093300  | -1.17112300 |
| H  | 3.42110500  | 4.02508100  | -1.74242500 |
| H  | 5.29040500  | 4.05107900  | -0.05494800 |
| H  | 5.63143400  | 1.99177200  | 1.36811700  |
| H  | 2.00754300  | 1.99959900  | -1.91276200 |
| C  | 4.18457900  | -0.24085000 | 1.44492200  |
| O  | 5.26814500  | -0.27353000 | 2.03760500  |
| O  | 3.21620800  | -1.04572100 | 1.51220100  |
| Au | 1.76028900  | -0.73604300 | -0.62337600 |
| Cl | 0.61255700  | -2.74020800 | -1.11279400 |
| Cl | 3.63961400  | -1.50020500 | -1.99666300 |
| C  | 1.43948700  | 2.93377800  | 2.32213500  |
| C  | 1.17442900  | 1.65403100  | 1.85675900  |
| C  | 0.20369200  | 1.42857500  | 0.86947200  |
| C  | -0.53596400 | 2.52690600  | 0.41455700  |
| C  | -0.27243700 | 3.80986500  | 0.88261000  |
| C  | 0.72400000  | 4.02267800  | 1.82830400  |
| H  | 2.21520100  | 3.07972100  | 3.07169600  |
| H  | 1.76731400  | 0.81866300  | 2.22616600  |
| H  | -1.36398500 | 2.38477600  | -0.27597100 |
| H  | -0.86374600 | 4.64398400  | 0.51037000  |
| H  | 0.93441800  | 5.02758200  | 2.18838900  |
| C  | -0.05360400 | 0.01970700  | 0.42179300  |
| C  | -1.20632100 | -0.25234400 | -0.51869200 |
| S  | -3.08066500 | 0.16614400  | -2.41966800 |

|   |             |             |             |
|---|-------------|-------------|-------------|
| O | -3.09697900 | 1.20898200  | -3.43293800 |
| O | -3.24379600 | -1.22153100 | -2.80393200 |
| C | -4.16500700 | 0.61613300  | -1.10612700 |
| C | -4.27969100 | 1.96719500  | -0.78201900 |
| C | -4.87518800 | -0.36704900 | -0.42375300 |
| C | -5.11489500 | 2.32934400  | 0.26415500  |
| H | -3.73016000 | 2.72170600  | -1.34273700 |
| C | -5.70882100 | 0.01974000  | 0.61539300  |
| H | -4.76407600 | -1.41140100 | -0.70353100 |
| C | -5.83769200 | 1.36534600  | 0.97631200  |
| H | -5.21235800 | 3.37986900  | 0.53451600  |
| H | -6.27046900 | -0.73707100 | 1.16221200  |
| C | -6.75581300 | 1.77070300  | 2.08676800  |
| H | -7.76415500 | 1.97370600  | 1.69993100  |
| H | -6.85050300 | 0.97954000  | 2.83948200  |
| H | -6.40866100 | 2.68436400  | 2.58290900  |
| N | -1.47938000 | 0.40000900  | -1.66493300 |
| C | -0.47027000 | 1.08691300  | -2.46804800 |
| H | -0.96573900 | 1.55103300  | -3.32239600 |
| H | 0.00577700  | 1.87793600  | -1.88223200 |
| H | 0.27248300  | 0.36324200  | -2.83061200 |
| N | 2.96850400  | 1.00199000  | -0.36552700 |
| C | -0.41450900 | -0.97280400 | 1.54613100  |
| C | -1.49292600 | -1.78551000 | 0.95568700  |
| C | -1.94574900 | -2.96304800 | 1.59112200  |
| C | -1.14504500 | -3.43792600 | 2.61031700  |
| C | 0.09434600  | -2.83704900 | 2.99409400  |
| C | 0.51675000  | -1.67455100 | 2.43418000  |
| C | -1.49290500 | -0.24772700 | 2.57898600  |
| H | 0.71389200  | -3.34919300 | 3.72570000  |
| H | 1.48442000  | -1.24046200 | 2.67147800  |
| H | -1.53664000 | -0.76848500 | 3.55561700  |
| C | -3.15724200 | -3.67203200 | 1.08679400  |
| H | -4.05807500 | -3.06163800 | 1.23691100  |
| H | -3.07324600 | -3.86015700 | 0.00832000  |
| H | -3.30044100 | -4.62847500 | 1.59944600  |
| N | -2.01994700 | -1.23651500 | -0.13888700 |
| O | -2.14631200 | 0.68970100  | 2.25314700  |
| H | -1.44160800 | -4.36096400 | 3.10834900  |

**TS<sub>ix</sub>**

E (M06-D3-CPCM/BS1) = -3151.91478887 au

H (M06-D3-CPCM/BS1) = -3151.368951 au

G (M06-D3-CPCM/BS1) = -3151.48708 au

E (M06-D3-SMD/BS2//M06-D3-CPCM/BS1) = -3153.06522416 au

|    |             |             |             |
|----|-------------|-------------|-------------|
| C  | -1.28635000 | -4.39094300 | 0.45820700  |
| C  | -2.62211400 | -4.62483500 | 0.76692200  |
| C  | -3.55006500 | -3.62445900 | 0.52247000  |
| C  | -3.13580300 | -2.39520800 | 0.02063900  |
| C  | -0.93326900 | -3.15745800 | -0.05937000 |
| H  | -0.52275600 | -5.15015000 | 0.59896500  |
| H  | -2.93560600 | -5.58291800 | 1.17508100  |
| H  | -4.61266500 | -3.75497900 | 0.70446700  |
| H  | 0.09029700  | -2.95453000 | -0.36191500 |
| C  | -4.18178000 | -1.29148800 | -0.21633300 |
| O  | -5.35406600 | -1.67859500 | -0.25788800 |
| O  | -3.72460100 | -0.11951700 | -0.31052900 |
| Au | -1.24689500 | -0.33135700 | -1.13380500 |
| Cl | -0.62903200 | 1.55119600  | -2.41781600 |
| Cl | -1.92669700 | -1.46761600 | -3.19844900 |
| C  | -1.92057600 | -1.55559100 | 3.43389500  |
| C  | -1.80436500 | -0.72226800 | 2.33108300  |
| C  | -0.54862400 | -0.26240800 | 1.89477400  |
| C  | 0.58188000  | -0.64076700 | 2.63281700  |
| C  | 0.46184600  | -1.47925700 | 3.73748500  |
| C  | -0.78359000 | -1.94610400 | 4.13966300  |
| H  | -2.90511100 | -1.90808400 | 3.73561000  |
| H  | -2.69426000 | -0.45320800 | 1.76396200  |
| H  | 1.56913400  | -0.27365800 | 2.35950800  |
| H  | 1.35622100  | -1.76107100 | 4.28925000  |
| H  | -0.87164800 | -2.60464900 | 5.00102500  |
| C  | -0.46350100 | 0.66762900  | 0.71976500  |
| C  | 0.90075500  | 1.22764100  | 0.33520700  |
| S  | 3.47739100  | 1.36067500  | -0.32188500 |
| O  | 3.31894000  | 1.72399400  | -1.72217900 |
| O  | 3.73377200  | 2.35975500  | 0.69938100  |
| C  | 4.69687000  | 0.09458700  | -0.18225900 |
| C  | 5.18468800  | -0.51659000 | -1.33306500 |
| C  | 5.14570700  | -0.26455300 | 1.08843600  |
| C  | 6.14662000  | -1.50943300 | -1.20117200 |
| H  | 4.81085300  | -0.21939800 | -2.31065800 |
| C  | 6.09980900  | -1.26399500 | 1.19641100  |
| H  | 4.74783800  | 0.22910300  | 1.97358700  |
| C  | 6.61528900  | -1.89651800 | 0.05760500  |
| H  | 6.53965100  | -1.99799300 | -2.09177300 |
| H  | 6.45823800  | -1.56253800 | 2.18087400  |
| C  | 7.66689800  | -2.95344700 | 0.19134000  |
| H  | 7.50761600  | -3.56652600 | 1.08638300  |

|   |             |             |             |
|---|-------------|-------------|-------------|
| H | 7.68969100  | -3.61347300 | -0.68313200 |
| H | 8.66277800  | -2.49871800 | 0.28534200  |
| N | 2.03534200  | 0.47627600  | 0.16585700  |
| C | 1.94772900  | -0.91101100 | -0.28831000 |
| H | 2.83782200  | -1.46642400 | 0.01581100  |
| H | 1.09814600  | -1.37481900 | 0.21367800  |
| H | 1.82291700  | -0.97006900 | -1.38044100 |
| N | -1.83353800 | -2.17680600 | -0.23092400 |
| C | -1.23919300 | 1.95760600  | 0.79207400  |
| C | -0.34219100 | 2.97764900  | 0.38149100  |
| C | -0.77103700 | 4.28784500  | 0.14254600  |
| C | -2.13963600 | 4.54650900  | 0.27885000  |
| C | -3.05766200 | 3.56433000  | 0.64106700  |
| C | -2.63063500 | 2.26563500  | 0.93371400  |
| C | -1.69014900 | 2.43618900  | 2.68149900  |
| H | -4.10994100 | 3.81173600  | 0.74856400  |
| H | -3.35195400 | 1.47124800  | 1.11636800  |
| H | -1.92206600 | 1.46759300  | 3.15312500  |
| C | 0.20079900  | 5.32141000  | -0.30920100 |
| H | 1.03812800  | 5.40800900  | 0.39465800  |
| H | 0.63578600  | 5.03090400  | -1.27572700 |
| H | -0.27451600 | 6.30101300  | -0.41944500 |
| N | 0.93344500  | 2.52312200  | 0.18236100  |
| O | -1.36040100 | 3.46698000  | 3.12802000  |
| H | -2.49673200 | 5.55592100  | 0.07909600  |

### TS<sub>ix-x</sub>

E (M06-D3-CPCM/BS1) = -3151.92784731 au

H (M06-D3-CPCM/BS1) = -3151.382429 au

G (M06-D3-CPCM/BS1) = -3151.499312 au

E (M06-D3-SMD/BS2//M06-D3-CPCM/BS1) = -3153.07604059 au

|    |             |             |             |
|----|-------------|-------------|-------------|
| C  | 0.94076900  | -4.14504200 | -0.65775500 |
| C  | 0.39894000  | -4.83585600 | 0.42240300  |
| C  | -0.71930000 | -4.32143600 | 1.05991400  |
| C  | -1.28450600 | -3.12811900 | 0.62043500  |
| C  | 0.34833700  | -2.95768300 | -1.04722500 |
| H  | 1.80962700  | -4.51262600 | -1.19575800 |
| H  | 0.84348200  | -5.77033700 | 0.75747700  |
| H  | -1.19660400 | -4.81639600 | 1.90060200  |
| H  | 0.73010800  | -2.37557600 | -1.88346600 |
| C  | -2.55570500 | -2.58933000 | 1.30744100  |
| O  | -2.93059700 | -3.23138000 | 2.29515100  |
| O  | -3.07213100 | -1.56813100 | 0.78108700  |
| Au | -1.55344600 | -0.65412900 | -1.11185900 |

|    |             |             |             |
|----|-------------|-------------|-------------|
| Cl | -2.38905600 | 1.27352100  | -2.21554300 |
| Cl | -2.48757300 | -2.04051000 | -2.89676100 |
| C  | -0.14336700 | -1.32982300 | 3.76596500  |
| C  | -0.67676900 | -0.49016700 | 2.79418600  |
| C  | -0.03297100 | -0.30779300 | 1.56077500  |
| C  | 1.17091300  | -0.99838800 | 1.34085300  |
| C  | 1.69592500  | -1.84173800 | 2.30832000  |
| C  | 1.04318200  | -2.01261700 | 3.52854100  |
| H  | -0.66944700 | -1.45180700 | 4.71026200  |
| H  | -1.61290400 | 0.01784400  | 3.01095900  |
| H  | 1.68460300  | -0.89041500 | 0.38879800  |
| H  | 2.62127700  | -2.37882800 | 2.10083500  |
| H  | 1.45675300  | -2.67663700 | 4.28463400  |
| C  | -0.62550400 | 0.58483800  | 0.51929300  |
| C  | 0.26509300  | 1.52376400  | -0.23532500 |
| S  | 2.76902800  | 2.15252500  | -0.03611900 |
| O  | 3.00542100  | 3.34105600  | -0.84508300 |
| O  | 2.36808500  | 2.28665100  | 1.36606200  |
| C  | 4.17936600  | 1.09933600  | -0.14935900 |
| C  | 5.06247500  | 1.26091000  | -1.21473700 |
| C  | 4.39032800  | 0.13317900  | 0.83320000  |
| C  | 6.16481200  | 0.42096600  | -1.30058300 |
| H  | 4.89141700  | 2.03710400  | -1.95782400 |
| C  | 5.49830000  | -0.69366700 | 0.72771800  |
| H  | 3.69907700  | 0.03725500  | 1.66842300  |
| C  | 6.39849600  | -0.56420600 | -0.33670600 |
| H  | 6.86130000  | 0.53354200  | -2.13042300 |
| H  | 5.67477900  | -1.45359300 | 1.48857000  |
| C  | 7.60600800  | -1.44511100 | -0.42110700 |
| H  | 7.40958600  | -2.43752200 | 0.00129200  |
| H  | 7.94419200  | -1.56796600 | -1.45638700 |
| H  | 8.44163600  | -1.01161700 | 0.14576800  |
| N  | 1.54231300  | 1.17235400  | -0.73720000 |
| C  | 1.60829400  | 1.09669300  | -2.20747800 |
| H  | 2.60374500  | 0.74566500  | -2.49974600 |
| H  | 0.87183200  | 0.35995200  | -2.54816600 |
| H  | 1.39448500  | 2.06719300  | -2.67456100 |
| N  | -0.72506600 | -2.46874500 | -0.40300100 |
| C  | -1.73334900 | 1.51436600  | 0.88418800  |
| C  | -1.40057000 | 2.77850200  | 0.29360300  |
| C  | -2.28804500 | 3.87752700  | 0.29134100  |
| C  | -3.48835200 | 3.67597800  | 0.95024000  |
| C  | -3.84222900 | 2.42864500  | 1.50764900  |
| C  | -3.00879100 | 1.32844500  | 1.44777600  |

|   |             |            |             |
|---|-------------|------------|-------------|
| C | -0.68546200 | 2.72891700 | 2.28736200  |
| H | -4.82217100 | 2.32599600 | 1.96828400  |
| H | -3.33058400 | 0.34111700 | 1.77274900  |
| H | 0.37861500  | 2.49843900 | 2.04157100  |
| C | -1.93201000 | 5.13473100 | -0.42237100 |
| H | -0.95227900 | 5.51302500 | -0.10512800 |
| H | -1.86058700 | 4.94528400 | -1.50290500 |
| H | -2.68362600 | 5.91248200 | -0.25506000 |
| N | -0.18158000 | 2.73474100 | -0.37156300 |
| O | -1.27575100 | 3.19231000 | 3.16808400  |
| H | -4.20356400 | 4.49557900 | 1.00172200  |

**x**

E (M06-D3-CPCM/BS1) = -3151.93304872 au

H (M06-D3-CPCM/BS1) = -3151.386175 au

G (M06-D3-CPCM/BS1) = -3151.504241 au

E (M06-D3-SMD/BS2//M06-D3-CPCM/BS1) = -3153.08220195 au

|    |             |             |             |
|----|-------------|-------------|-------------|
| C  | 0.96860400  | -4.19376700 | -0.52320700 |
| C  | 0.38396100  | -4.87287400 | 0.54160000  |
| C  | -0.75792700 | -4.35011100 | 1.12848300  |
| C  | -1.30204100 | -3.15978600 | 0.65492700  |
| C  | 0.39205900  | -3.01153000 | -0.95025400 |
| H  | 1.85781500  | -4.56755800 | -1.02225500 |
| H  | 0.81336600  | -5.80424300 | 0.90397000  |
| H  | -1.26825800 | -4.83459900 | 1.95568400  |
| H  | 0.80904100  | -2.44442900 | -1.77966400 |
| C  | -2.59678600 | -2.61264800 | 1.28515200  |
| O  | -2.99211500 | -3.21874700 | 2.28747100  |
| O  | -3.11198100 | -1.62252400 | 0.70063500  |
| Au | -1.50306900 | -0.70135000 | -1.12108300 |
| Cl | -2.25020500 | 1.25945300  | -2.24249300 |
| Cl | -2.34891500 | -2.09033200 | -2.95473400 |
| C  | -0.25561900 | -1.20908400 | 3.83776400  |
| C  | -0.77710100 | -0.41998100 | 2.81841900  |
| C  | -0.10132600 | -0.28123900 | 1.59763100  |
| C  | 1.12180800  | -0.95530600 | 1.43828200  |
| C  | 1.63898700  | -1.74087500 | 2.45712600  |
| C  | 0.95193500  | -1.87470000 | 3.66315200  |
| H  | -0.80298000 | -1.30020200 | 4.77352100  |
| H  | -1.72076600 | 0.09311900  | 2.98803000  |
| H  | 1.65939800  | -0.87660900 | 0.49621700  |
| H  | 2.58165300  | -2.26480600 | 2.30078000  |
| H  | 1.35737900  | -2.49500400 | 4.45981500  |
| C  | -0.66738800 | 0.56197000  | 0.50015200  |

|   |             |             |             |
|---|-------------|-------------|-------------|
| C | 0.27238300  | 1.53717700  | -0.17919600 |
| S | 2.79221200  | 2.20307100  | -0.09076500 |
| O | 3.01794300  | 3.30817600  | -1.01425900 |
| O | 2.44838100  | 2.46506900  | 1.30438300  |
| C | 4.18008600  | 1.11353000  | -0.16055000 |
| C | 5.06471900  | 1.20418700  | -1.23140400 |
| C | 4.37009800  | 0.18936600  | 0.86659800  |
| C | 6.15092900  | 0.33882300  | -1.27605900 |
| H | 4.90558100  | 1.94526500  | -2.01208500 |
| C | 5.46007200  | -0.66421700 | 0.80179800  |
| H | 3.67504100  | 0.14606600  | 1.70352600  |
| C | 6.36414600  | -0.60320200 | -0.26652500 |
| H | 6.84916700  | 0.39726900  | -2.10999300 |
| H | 5.62046800  | -1.39210500 | 1.59697900  |
| C | 7.54984400  | -1.51666700 | -0.30386900 |
| H | 8.34607200  | -1.14625500 | 0.35654500  |
| H | 7.28939000  | -2.52407500 | 0.04283300  |
| H | 7.96912100  | -1.59479900 | -1.31318400 |
| N | 1.54308000  | 1.17341100  | -0.67646200 |
| C | 1.59761400  | 0.94591700  | -2.13021200 |
| H | 2.57779400  | 0.53332900  | -2.39180900 |
| H | 0.83147800  | 0.21069200  | -2.40054000 |
| H | 1.41217100  | 1.87380100  | -2.68843600 |
| N | -0.70552000 | -2.51287400 | -0.35629400 |
| C | -1.80769400 | 1.46082100  | 0.79992500  |
| C | -1.35288600 | 2.81284800  | 0.49248700  |
| C | -2.31655500 | 3.86869500  | 0.25165100  |
| C | -3.58011800 | 3.64662800  | 0.75323800  |
| C | -3.93089300 | 2.39661800  | 1.29264300  |
| C | -3.08720800 | 1.27691200  | 1.27354800  |
| C | -0.81002600 | 3.22042300  | 2.11489200  |
| H | -4.94256300 | 2.26973800  | 1.67423100  |
| H | -3.45906100 | 0.28177400  | 1.51408000  |
| H | 0.29869600  | 3.25397400  | 2.04736900  |
| C | -1.88628800 | 5.11181600  | -0.42762200 |
| H | -0.99355000 | 5.54189000  | 0.04742700  |
| H | -1.59373200 | 4.87791100  | -1.46201500 |
| H | -2.68248200 | 5.86155900  | -0.43884900 |
| N | -0.12348100 | 2.75789300  | -0.22693500 |
| O | -1.51585300 | 3.38839500  | 3.03835200  |
| H | -4.33204600 | 4.43034200  | 0.69025100  |

**TS**<sub>x-xi</sub>

E (M06-D3-CPCM/BS1) = -3151.92605241 au

H (M06-D3-CPCM/BS1) = -3151.380591 au

G (M06-D3-CPCM/BS1) = -3151.498344 au

E (M06-D3-SMD/BS2//M06-D3-CPCM/BS1) = -3153.07947379 au

|    |             |             |             |
|----|-------------|-------------|-------------|
| C  | 0.35033100  | -4.39277100 | -0.20234400 |
| C  | -0.30647900 | -4.87207900 | 0.92718900  |
| C  | -1.36185900 | -4.14304000 | 1.45312200  |
| C  | -1.74532600 | -2.94485200 | 0.85743400  |
| C  | -0.06741400 | -3.19367800 | -0.74980400 |
| H  | 1.17301800  | -4.93393200 | -0.66045800 |
| H  | -0.00150600 | -5.81043200 | 1.38508500  |
| H  | -1.92378700 | -4.46808300 | 2.32374200  |
| H  | 0.40476000  | -2.77930000 | -1.63814400 |
| C  | -2.95239100 | -2.16860000 | 1.41339800  |
| O  | -3.40801200 | -2.59164900 | 2.48235200  |
| O  | -3.34793300 | -1.20262900 | 0.70771200  |
| Au | -1.60152800 | -0.65436600 | -1.15591500 |
| Cl | -1.96513700 | 1.28555900  | -2.47587800 |
| Cl | -2.66058500 | -2.06770000 | -2.86251000 |
| C  | -0.39825000 | -0.95528000 | 3.79303300  |
| C  | -0.83678000 | -0.19689200 | 2.71352100  |
| C  | -0.13746000 | -0.19306500 | 1.49711400  |
| C  | 1.02483900  | -0.97874300 | 1.41254700  |
| C  | 1.46519000  | -1.72995400 | 2.49199900  |
| C  | 0.75377400  | -1.72524800 | 3.69077300  |
| H  | -0.96843000 | -0.93902000 | 4.71944100  |
| H  | -1.73622600 | 0.40116600  | 2.83248300  |
| H  | 1.58814100  | -1.02590800 | 0.48513600  |
| H  | 2.36703000  | -2.33205600 | 2.38818300  |
| H  | 1.09679000  | -2.31846500 | 4.53589900  |
| C  | -0.62703300 | 0.61963500  | 0.33211900  |
| C  | 0.45975600  | 1.47028900  | -0.31770200 |
| S  | 3.05173300  | 2.01310700  | -0.45863300 |
| O  | 3.32407400  | 2.81511000  | -1.64289000 |
| O  | 2.82593600  | 2.63878300  | 0.83520000  |
| C  | 4.29701600  | 0.77408600  | -0.29374600 |
| C  | 5.18313700  | 0.53870800  | -1.34023000 |
| C  | 4.35590900  | 0.04558700  | 0.89444900  |
| C  | 6.14431500  | -0.45286400 | -1.18828800 |
| H  | 5.11769700  | 1.12314900  | -2.25567200 |
| C  | 5.31872000  | -0.94280400 | 1.02188300  |
| H  | 3.65607300  | 0.25248700  | 1.70288500  |
| C  | 6.22588000  | -1.20480900 | -0.01312400 |
| H  | 6.84479500  | -0.64931200 | -1.99893800 |
| H  | 5.37566600  | -1.52321900 | 1.94246600  |



|   |             |             |             |
|---|-------------|-------------|-------------|
| C | 7.27783600  | -2.25693000 | 0.15265000  |
| H | 6.89551600  | -3.12143900 | 0.70851300  |
| H | 7.65688300  | -2.60548800 | -0.81462100 |
| H | 8.13347700  | -1.86345200 | 0.71874100  |
| N | 1.67914700  | 0.99964600  | -0.75275600 |
| C | 1.81678500  | 0.05922500  | -1.87216700 |
| H | 2.41450500  | -0.81595800 | -1.59000000 |
| H | 0.82135500  | -0.26093400 | -2.19563000 |
| H | 2.28611100  | 0.56691400  | -2.72427100 |
| N | -1.07786700 | -2.49022700 | -0.21201700 |
| C | -1.62986700 | 1.68528100  | 0.63469800  |
| C | -1.01354300 | 2.91774100  | 0.28620800  |
| C | -1.67587300 | 4.17333700  | 0.42118300  |
| C | -2.98677600 | 4.13143800  | 0.94674300  |
| C | -3.56718100 | 2.93165700  | 1.30385000  |
| C | -2.91056800 | 1.69119700  | 1.13438500  |
| C | -0.47541600 | 3.70181200  | 2.05238500  |
| H | -4.57566400 | 2.93205000  | 1.71111100  |
| H | -3.42237500 | 0.75157000  | 1.34687600  |
| H | 0.49856400  | 4.13459000  | 1.75487700  |
| C | -1.07162900 | 5.41718500  | -0.13628800 |
| H | 0.00859300  | 5.47795400  | 0.04658600  |
| H | -1.19277200 | 5.41387700  | -1.22830000 |
| H | -1.55657200 | 6.31160600  | 0.26634300  |
| N | 0.22714000  | 2.75260900  | -0.30524700 |
| O | -0.93888900 | 3.35659200  | 3.06302200  |
| H | -3.52961300 | 5.06599900  | 1.07070100  |

xi

E (M06-D3-CPCM/BS1) = -3151.94495538 au

H (M06-D3-CPCM/BS1) = -3151.396872 au

G (M06-D3-CPCM/BS1) = -3151.515944 au

E (M06-D3-SMD/BS2//M06-D3-CPCM/BS1) = -3153.093973 au

|   |             |             |             |
|---|-------------|-------------|-------------|
| C | -1.96381300 | -4.14266100 | 1.23587800  |
| C | -3.34504300 | -4.17437100 | 1.39842000  |
| C | -4.10859300 | -3.16182600 | 0.83895900  |
| C | -3.49146300 | -2.11449400 | 0.16275400  |
| C | -1.40525700 | -3.09074800 | 0.53221400  |
| H | -1.32078900 | -4.92239700 | 1.63318700  |
| H | -3.81841500 | -4.98750900 | 1.94391700  |
| H | -5.19228800 | -3.14164900 | 0.90453900  |
| H | -0.33502700 | -3.05197600 | 0.34599100  |
| C | -4.35435900 | -0.97650600 | -0.40930700 |
| O | -5.56192900 | -1.22386200 | -0.49669100 |

|    |             |             |             |
|----|-------------|-------------|-------------|
| O  | -3.73458900 | 0.08410400  | -0.69263800 |
| Au | -1.22576600 | -0.53394700 | -1.08393300 |
| Cl | -0.09647600 | 1.01456600  | -2.47208700 |
| Cl | -1.83191400 | -1.90319200 | -3.03460400 |
| C  | -2.45049500 | -0.88712300 | 3.53155900  |
| C  | -2.15457500 | -0.22518400 | 2.35101100  |
| C  | -0.82642100 | -0.05603200 | 1.92812000  |
| C  | 0.19500000  | -0.53145900 | 2.76179400  |
| C  | -0.10408700 | -1.18657000 | 3.95311300  |
| C  | -1.42473600 | -1.37818900 | 4.33860500  |
| H  | -3.49070100 | -1.02145000 | 3.82254600  |
| H  | -2.96625300 | 0.12789300  | 1.71887300  |
| H  | 1.24183100  | -0.37357200 | 2.51046800  |
| H  | 0.70903300  | -1.54225900 | 4.58251900  |
| H  | -1.65672500 | -1.89793600 | 5.26584400  |
| C  | -0.55303900 | 0.65301300  | 0.62879200  |
| C  | 0.90003700  | 1.05087900  | 0.40594100  |
| S  | 3.55783400  | 1.04933100  | 0.04456000  |
| O  | 3.51732800  | 1.68459800  | -1.25835800 |
| O  | 3.79729300  | 1.79716700  | 1.26314000  |
| C  | 4.62922100  | -0.34114900 | -0.01132700 |
| C  | 4.93255000  | -0.91337400 | -1.24541800 |
| C  | 5.14146400  | -0.84514100 | 1.18425500  |
| C  | 5.76970800  | -2.01874900 | -1.27267800 |
| H  | 4.51725400  | -0.49949600 | -2.16204000 |
| C  | 5.97411000  | -1.95202100 | 1.13011200  |
| H  | 4.88802500  | -0.37761700 | 2.13351500  |
| C  | 6.29980500  | -2.55215000 | -0.09270400 |
| H  | 6.01798700  | -2.48062100 | -2.22710900 |
| H  | 6.38354900  | -2.36211100 | 2.05227800  |
| C  | 7.22115800  | -3.73016500 | -0.13617900 |
| H  | 8.26780600  | -3.39818500 | -0.17859700 |
| H  | 7.11641700  | -4.35542400 | 0.75803500  |
| H  | 7.04004300  | -4.35130300 | -1.02060000 |
| N  | 1.95175500  | 0.24182900  | 0.28202100  |
| C  | 1.83074700  | -1.19085500 | 0.02499600  |
| H  | 2.67189400  | -1.72904800 | 0.46664700  |
| H  | 0.92405600  | -1.55191800 | 0.51147000  |
| H  | 1.78529900  | -1.38378500 | -1.05601500 |
| N  | -2.15384800 | -2.09108700 | 0.04099300  |
| C  | -1.18805800 | 2.00973400  | 0.50884800  |
| C  | -0.11865800 | 2.92932900  | 0.38944700  |
| C  | -0.32781800 | 4.37775500  | 0.19633100  |
| C  | -1.74829000 | 4.78795900  | 0.32242300  |

|   |             |            |             |
|---|-------------|------------|-------------|
| C | -2.74416400 | 3.88370100 | 0.42156100  |
| C | -2.47512000 | 2.47225400 | 0.49226300  |
| C | 0.61886300  | 5.21585600 | 1.07043000  |
| H | -3.78087800 | 4.20857200 | 0.45487800  |
| H | -3.31275100 | 1.77676600 | 0.48420800  |
| H | 1.57981300  | 4.70935000 | 1.30643900  |
| C | 0.15105400  | 4.70832200 | -1.26009000 |
| H | 1.20692900  | 4.43258300 | -1.37111900 |
| H | -0.44397600 | 4.13092500 | -1.97723800 |
| H | 0.02069100  | 5.77979400 | -1.44660000 |
| N | 1.09050800  | 2.37880800 | 0.35651500  |
| O | 0.36844800  | 6.34267400 | 1.40356800  |
| H | -1.94968200 | 5.85699100 | 0.28586400  |

**TS**<sub>xi-xii</sub>

E (M06-D3-CPCM/BS1) = -3151.91938638 au

H (M06-D3-CPCM/BS1) = -3151.37418 au

G (M06-D3-CPCM/BS1) = -3151.489179 au

E (M06-D3-SMD/BS2//M06-D3-CPCM/BS1) = -3153.07225723 au

|    |             |             |             |
|----|-------------|-------------|-------------|
| C  | -1.56261200 | -4.02059700 | 1.55841300  |
| C  | -2.92754300 | -4.15986200 | 1.78636800  |
| C  | -3.80249600 | -3.27565800 | 1.17473100  |
| C  | -3.31271600 | -2.25388300 | 0.36795800  |
| C  | -1.13175700 | -2.99695200 | 0.73359800  |
| H  | -0.83449100 | -4.69344000 | 2.00176600  |
| H  | -3.30220900 | -4.95420800 | 2.42794400  |
| H  | -4.87965000 | -3.33946600 | 1.29616400  |
| H  | -0.07409500 | -2.86557100 | 0.51837300  |
| C  | -4.29881500 | -1.25741800 | -0.26430100 |
| O  | -5.48788000 | -1.59325100 | -0.22134900 |
| O  | -3.78685600 | -0.20232300 | -0.72586200 |
| Au | -1.24718200 | -0.63170100 | -1.15572200 |
| Cl | -0.31295300 | 0.87088200  | -2.72821000 |
| Cl | -1.86407000 | -2.21289400 | -2.93947900 |
| C  | -2.05838400 | -0.68004100 | 3.58206100  |
| C  | -1.89463700 | -0.06248500 | 2.35285500  |
| C  | -0.62613900 | 0.05022700  | 1.75824300  |
| C  | 0.47535600  | -0.45735900 | 2.46278100  |
| C  | 0.30899600  | -1.07100900 | 3.70071900  |
| C  | -0.95523200 | -1.19288000 | 4.26361700  |
| H  | -3.05603000 | -0.76486900 | 4.00864100  |
| H  | -2.77353900 | 0.30092700  | 1.82615700  |
| H  | 1.48206900  | -0.36208700 | 2.06372500  |
| H  | 1.18244300  | -1.45197200 | 4.22606400  |

|   |             |             |             |
|---|-------------|-------------|-------------|
| H | -1.08321300 | -1.67749300 | 5.22934900  |
| C | -0.49218200 | 0.70100600  | 0.40870600  |
| C | 0.91584400  | 1.19569900  | 0.06431200  |
| S | 3.54553400  | 1.27839100  | -0.34096700 |
| O | 3.54331300  | 1.66974600  | -1.74226000 |
| O | 3.71724700  | 2.25169400  | 0.72216800  |
| C | 4.71074800  | -0.02220500 | -0.09563700 |
| C | 5.29725600  | -0.63530800 | -1.19789800 |
| C | 5.02211100  | -0.40237900 | 1.21003400  |
| C | 6.21619300  | -1.65404800 | -0.98116300 |
| H | 5.03432900  | -0.31825800 | -2.20498900 |
| C | 5.93458900  | -1.42729300 | 1.40209200  |
| H | 4.55229100  | 0.09607300  | 2.05661500  |
| C | 6.54542900  | -2.06421000 | 0.31363600  |
| H | 6.68531900  | -2.14403600 | -1.83327000 |
| H | 6.18557200  | -1.74252500 | 2.41423700  |
| C | 7.54998800  | -3.15009100 | 0.54292500  |
| H | 7.25810000  | -3.79473000 | 1.38072800  |
| H | 7.68043600  | -3.77512900 | -0.34750100 |
| H | 8.53113000  | -2.72324700 | 0.79289800  |
| N | 2.03698300  | 0.42073100  | -0.03043900 |
| C | 2.00435700  | -0.97359000 | -0.47520400 |
| H | 2.72196700  | -1.57747100 | 0.08682300  |
| H | 1.00718300  | -1.37292700 | -0.29148400 |
| H | 2.20292300  | -1.04541500 | -1.55362700 |
| N | -1.98906500 | -2.12871600 | 0.17564300  |
| C | -1.24281200 | 1.99091900  | 0.26436100  |
| C | -0.26860100 | 2.98340900  | 0.06206100  |
| C | -0.61246400 | 4.34697800  | -0.00646200 |
| C | -2.01709000 | 4.65539200  | 0.08419500  |
| C | -2.98265400 | 3.64323700  | 0.16345400  |
| C | -2.59978700 | 2.31093200  | 0.27174300  |
| C | -1.19658600 | 4.81477400  | 1.82196000  |
| H | -4.03481100 | 3.91273000  | 0.18058600  |
| H | -3.35364300 | 1.52531400  | 0.28262100  |
| H | -0.92564100 | 5.88070900  | 1.89350700  |
| C | 0.40562600  | 5.38730200  | -0.33576800 |
| H | 1.33572300  | 5.23272200  | 0.22201100  |
| H | 0.64966900  | 5.31934200  | -1.40448300 |
| H | 0.02803100  | 6.40064300  | -0.15410100 |
| N | 1.00212200  | 2.49404800  | -0.06803100 |
| O | -1.34361200 | 4.00793300  | 2.66202600  |
| H | -2.32353500 | 5.69020400  | -0.07488000 |

xii

E (M06-D3-CPCM/BS1) = -3151.93301301 au

H (M06-D3-CPCM/BS1) = -3151.38556 au

G (M06-D3-CPCM/BS1) = -3151.507434 au

E (M06-D3-SMD/BS2//M06-D3-CPCM/BS1) = -3153.08475425 au

|    |             |             |             |
|----|-------------|-------------|-------------|
| C  | -0.82774800 | -4.45037600 | 1.09507600  |
| C  | -2.14615600 | -4.79253000 | 1.37653900  |
| C  | -3.16238300 | -3.96278600 | 0.92944200  |
| C  | -2.85693000 | -2.79028700 | 0.24659600  |
| C  | -0.58242800 | -3.28427500 | 0.39235700  |
| H  | 0.00559200  | -5.07685600 | 1.39897100  |
| H  | -2.37573500 | -5.70316200 | 1.92507400  |
| H  | -4.21325900 | -4.18567300 | 1.08800900  |
| H  | 0.43111600  | -3.00599300 | 0.11719300  |
| C  | -4.00029000 | -1.86656100 | -0.20683300 |
| O  | -5.12577500 | -2.37664400 | -0.19565300 |
| O  | -3.66026300 | -0.69081300 | -0.50784600 |
| Au | -1.13198000 | -0.71138800 | -1.12979000 |
| Cl | -0.58615800 | 1.06528600  | -2.58594000 |
| Cl | -1.56380300 | -2.16421100 | -3.04841200 |
| C  | -1.72327100 | -1.46022700 | 3.56516700  |
| C  | -1.70315200 | -0.71246700 | 2.39859500  |
| C  | -0.49435100 | -0.24220400 | 1.85878600  |
| C  | 0.69017000  | -0.52554500 | 2.55495300  |
| C  | 0.66573800  | -1.27267400 | 3.72841600  |
| C  | -0.53642000 | -1.74836500 | 4.23727500  |
| H  | -2.67448200 | -1.82513400 | 3.94815400  |
| H  | -2.63689800 | -0.53602400 | 1.87236000  |
| H  | 1.64540200  | -0.15105100 | 2.19500400  |
| H  | 1.60030400  | -1.47681600 | 4.24691800  |
| H  | -0.55250600 | -2.33669100 | 5.15233900  |
| C  | -0.48286000 | 0.56314800  | 0.59031000  |
| C  | 0.82162400  | 1.25962500  | 0.20011600  |
| S  | 3.39357900  | 1.64584000  | -0.35887000 |
| O  | 3.29428400  | 1.95989900  | -1.77771600 |
| O  | 3.47617800  | 2.69407600  | 0.64267600  |
| C  | 4.73999800  | 0.53317200  | -0.10003800 |
| C  | 5.40665000  | -0.00576000 | -1.19553700 |
| C  | 5.11524800  | 0.23210000  | 1.20894600  |
| C  | 6.47379600  | -0.86548200 | -0.96817800 |
| H  | 5.08739300  | 0.24292300  | -2.20551400 |
| C  | 6.17743700  | -0.63457300 | 1.41238000  |
| H  | 4.58040600  | 0.66979400  | 2.05041500  |
| C  | 6.87247500  | -1.19161000 | 0.33108500  |

|   |             |             |             |
|---|-------------|-------------|-------------|
| H | 7.00625800  | -1.29622700 | -1.81514300 |
| H | 6.48072300  | -0.88613000 | 2.42809700  |
| C | 8.03566600  | -2.10322100 | 0.57051500  |
| H | 8.94737900  | -1.52367800 | 0.77127400  |
| H | 7.86664900  | -2.74768000 | 1.44155100  |
| H | 8.23622800  | -2.73936400 | -0.29892900 |
| N | 2.03983700  | 0.62290100  | 0.06353300  |
| C | 2.09265300  | -0.74252300 | -0.46032700 |
| H | 3.06681400  | -1.18781700 | -0.24723000 |
| H | 1.35252400  | -1.33783000 | 0.07708500  |
| H | 1.89354200  | -0.77520600 | -1.54124200 |
| N | -1.57459200 | -2.46426200 | 0.01288000  |
| C | -1.41455500 | 1.71657500  | 0.52772900  |
| C | -0.62119600 | 2.85610300  | 0.23328500  |
| C | -1.14983500 | 4.12042300  | 0.15625300  |
| C | -2.60717600 | 4.26587000  | 0.35454200  |
| C | -3.37995200 | 3.04989400  | 0.64942900  |
| C | -2.81073700 | 1.81790700  | 0.72124600  |
| C | -2.99966200 | 5.43390500  | 1.30368500  |
| H | -4.44794500 | 3.17788600  | 0.81064600  |
| H | -3.42737200 | 0.93526600  | 0.84944100  |
| H | -2.22080100 | 6.21474600  | 1.41859500  |
| C | -0.30751100 | 5.30598500  | -0.12857500 |
| H | -0.02825200 | 5.81301600  | 0.80937400  |
| H | 0.62360300  | 5.00677900  | -0.61871600 |
| H | -0.83085600 | 6.04299400  | -0.74952200 |
| N | 0.71223300  | 2.53794700  | 0.03452000  |
| O | -4.06941800 | 5.49903400  | 1.83716600  |
| H | -3.00877100 | 4.65589900  | -0.60984700 |

**TS<sub>xi-xii'</sub>**

E (M06-D3-CPCM/BS1) = -3151.89949985 au

H (M06-D3-CPCM/BS1) = -3151.35285 au

G (M06-D3-CPCM/BS1) = -3151.470777 au

E (M06-D3-SMD/BS2//M06-D3-CPCM/BS1) = -3153.05000491 au

|   |             |             |             |
|---|-------------|-------------|-------------|
| C | -1.49797500 | -4.40497600 | 0.65924500  |
| C | -2.84957300 | -4.59010300 | 0.93040200  |
| C | -3.73929200 | -3.57231000 | 0.62420000  |
| C | -3.27452300 | -2.37598700 | 0.08767700  |
| C | -1.09389100 | -3.20359400 | 0.10505800  |
| H | -0.76114100 | -5.17747100 | 0.85828000  |
| H | -3.20356300 | -5.52275200 | 1.36374900  |
| H | -4.80933600 | -3.66196200 | 0.78560900  |
| H | -0.05240400 | -3.03511400 | -0.15630100 |

|    |             |             |             |
|----|-------------|-------------|-------------|
| C  | -4.27526800 | -1.24431700 | -0.20482400 |
| O  | -5.46375800 | -1.58469500 | -0.21834900 |
| O  | -3.77164900 | -0.10053800 | -0.36617500 |
| Au | -1.27846600 | -0.41550500 | -1.07462100 |
| Cl | -0.47344200 | 1.43543300  | -2.31365200 |
| Cl | -1.97646900 | -1.52547700 | -3.15590900 |
| C  | -1.90305900 | -1.67671800 | 3.51667600  |
| C  | -1.80117700 | -0.79300500 | 2.45448200  |
| C  | -0.55077600 | -0.43581400 | 1.92173400  |
| C  | 0.59546400  | -0.97779300 | 2.52199800  |
| C  | 0.49092800  | -1.85891600 | 3.59411600  |
| C  | -0.75477000 | -2.21850800 | 4.09312000  |
| H  | -2.88754800 | -1.94707600 | 3.89408200  |
| H  | -2.70979300 | -0.41290100 | 1.99509400  |
| H  | 1.58774000  | -0.70167600 | 2.17276100  |
| H  | 1.39787500  | -2.26054900 | 4.04155600  |
| H  | -0.83416100 | -2.91232800 | 4.92747200  |
| C  | -0.47647400 | 0.51866000  | 0.76515600  |
| C  | 0.90185400  | 1.09361200  | 0.44015500  |
| S  | 3.49689100  | 1.27282300  | -0.12816100 |
| O  | 3.39942800  | 1.85669900  | -1.45765500 |
| O  | 3.73019900  | 2.09471600  | 1.04581500  |
| C  | 4.69041500  | -0.02532900 | -0.14727600 |
| C  | 5.20901400  | -0.46047300 | -1.36281600 |
| C  | 5.08380800  | -0.59078400 | 1.06534100  |
| C  | 6.14459700  | -1.48664600 | -1.35671900 |
| H  | 4.87748400  | -0.00429700 | -2.29324500 |
| C  | 6.01239200  | -1.61958700 | 1.04659000  |
| H  | 4.66384300  | -0.23122300 | 2.00339900  |
| C  | 6.55668800  | -2.07933200 | -0.15964100 |
| H  | 6.56071100  | -1.83979200 | -2.29932300 |
| H  | 6.32718000  | -2.07829300 | 1.98319000  |
| C  | 7.57870100  | -3.17312000 | -0.15938300 |
| H  | 8.58100600  | -2.76640900 | 0.03405100  |
| H  | 7.37464000  | -3.91219400 | 0.62445800  |
| H  | 7.61617000  | -3.69066900 | -1.12458100 |
| N  | 2.02498800  | 0.35617300  | 0.16657200  |
| C  | 1.92415200  | -0.93738900 | -0.50969100 |
| H  | 2.80848200  | -1.54356500 | -0.30168300 |
| H  | 1.06816900  | -1.46957100 | -0.09405300 |
| H  | 1.79352900  | -0.81437000 | -1.59470600 |
| N  | -1.96121100 | -2.21029800 | -0.14196100 |
| C  | -1.24882600 | 1.79394200  | 0.91225600  |
| C  | -0.31807600 | 2.81693700  | 0.76282400  |

|   |             |            |             |
|---|-------------|------------|-------------|
| C | -0.70012900 | 4.18163600 | 0.84695800  |
| C | -2.08143800 | 4.47330500 | 1.08505600  |
| C | -3.00494600 | 3.41062500 | 1.26329100  |
| C | -2.60031400 | 2.09582000 | 1.16191500  |
| C | 0.33658500  | 5.24787600 | 1.03876100  |
| H | -4.04232600 | 3.64972000 | 1.47794100  |
| H | -3.34346300 | 1.30655000 | 1.22078400  |
| H | 1.34557000  | 4.86545100 | 1.28779500  |
| C | -1.68980300 | 4.63141900 | -0.71523900 |
| H | -0.79829400 | 5.11193600 | -1.12440300 |
| H | -1.89622200 | 3.66260600 | -1.17155500 |
| H | -2.51580900 | 5.34031500 | -0.81752900 |
| N | 0.95689300  | 2.39724200 | 0.48609600  |
| O | 0.07577400  | 6.42266000 | 0.94575200  |
| H | -2.34166000 | 5.48878000 | 1.37679600  |

**xii'**

E (M06-D3-CPCM/BS1) = -3151.93490443 au

H (M06-D3-CPCM/BS1) = -3151.38668 au

G (M06-D3-CPCM/BS1) = -3151.506293 au

E (M06-D3-SMD/BS2//M06-D3-CPCM/BS1) = -3153.08450227 au

|    |             |             |             |
|----|-------------|-------------|-------------|
| C  | -1.23971200 | -4.50180000 | 0.51896400  |
| C  | -2.57800900 | -4.76936300 | 0.78738200  |
| C  | -3.52333000 | -3.79207900 | 0.51772100  |
| C  | -3.12627000 | -2.55482300 | 0.02214700  |
| C  | -0.90305300 | -3.26213900 | 0.00589900  |
| H  | -0.46103900 | -5.23957800 | 0.68800700  |
| H  | -2.87857800 | -5.73443800 | 1.18873400  |
| H  | -4.58665100 | -3.94520500 | 0.67665700  |
| H  | 0.12548500  | -3.03069900 | -0.25649500 |
| C  | -4.18783800 | -1.47031000 | -0.23185800 |
| O  | -5.35462200 | -1.87403500 | -0.26867200 |
| O  | -3.74494000 | -0.29507200 | -0.34181000 |
| Au | -1.25698600 | -0.44051600 | -1.06159300 |
| Cl | -0.62086000 | 1.51419200  | -2.22598700 |
| Cl | -1.84043600 | -1.52046900 | -3.16561900 |
| C  | -1.76689500 | -1.92343200 | 3.47889300  |
| C  | -1.71991200 | -1.00110900 | 2.44574000  |
| C  | -0.49338400 | -0.53294000 | 1.94652600  |
| C  | 0.68408700  | -1.00410800 | 2.54622200  |
| C  | 0.63295500  | -1.92794700 | 3.58521200  |
| C  | -0.58832300 | -2.39690700 | 4.05321300  |
| H  | -2.73282100 | -2.27979100 | 3.83174200  |
| H  | -2.65046400 | -0.68111700 | 1.98582500  |



|   |             |             |             |
|---|-------------|-------------|-------------|
| H | 1.65592900  | -0.64183100 | 2.21920200  |
| H | 1.56217700  | -2.27650600 | 4.03110100  |
| H | -0.62515900 | -3.12350400 | 4.86212400  |
| C | -0.45296300 | 0.46785300  | 0.82817000  |
| C | 0.88923300  | 1.11312300  | 0.48472700  |
| S | 3.45748600  | 1.41306400  | -0.14082400 |
| O | 3.30455400  | 1.97471900  | -1.47438400 |
| O | 3.66599300  | 2.25779600  | 1.02095000  |
| C | 4.71749000  | 0.17953300  | -0.16603400 |
| C | 5.25922400  | -0.22005000 | -1.38369700 |
| C | 5.15370700  | -0.35661400 | 1.04536900  |
| C | 6.26433400  | -1.17832100 | -1.38082000 |
| H | 4.89439800  | 0.21270400  | -2.31282000 |
| C | 6.15153700  | -1.31817900 | 1.02314700  |
| H | 4.71501900  | -0.02530400 | 1.98524200  |
| C | 6.72287400  | -1.73843400 | -0.18504900 |
| H | 6.70074600  | -1.50155300 | -2.32492700 |
| H | 6.50178900  | -1.75276500 | 1.95866100  |
| C | 7.82239700  | -2.75419900 | -0.18776400 |
| H | 8.79127200  | -2.27575000 | 0.01174600  |
| H | 7.67114300  | -3.51091700 | 0.59122400  |
| H | 7.90094800  | -3.26177400 | -1.15576600 |
| N | 2.03754700  | 0.42519800  | 0.18925700  |
| C | 1.97644000  | -0.86374600 | -0.50162900 |
| H | 2.90346100  | -1.41910700 | -0.34422100 |
| H | 1.17467300  | -1.45223500 | -0.05318500 |
| H | 1.78953500  | -0.73683700 | -1.57807000 |
| N | -1.82463800 | -2.30914900 | -0.20184200 |
| C | -1.29001300 | 1.67602800  | 0.96694600  |
| C | -0.40941400 | 2.80229500  | 0.77732300  |
| C | -0.86668000 | 4.08711500  | 0.87258100  |
| C | -2.31090100 | 4.33539500  | 1.04826200  |
| C | -3.12431000 | 3.14649400  | 1.31127200  |
| C | -2.64812400 | 1.86205900  | 1.25791700  |
| C | 0.05748700  | 5.22675700  | 0.77644200  |
| H | -4.18745100 | 3.31068000  | 1.48394500  |
| H | -3.33100200 | 1.02519600  | 1.34304600  |
| H | 1.11902100  | 4.96339500  | 0.60176800  |
| C | -2.89892100 | 4.98871200  | -0.25149800 |
| H | -2.36553000 | 5.92546600  | -0.43567900 |
| H | -2.76415400 | 4.31078900  | -1.10207200 |
| H | -3.96463400 | 5.19789400  | -0.11820300 |
| N | 0.88011600  | 2.41242500  | 0.50919100  |
| O | -0.31334200 | 6.37974000  | 0.88987900  |

|   |             |            |            |
|---|-------------|------------|------------|
| H | -2.46857400 | 5.08353200 | 1.84444200 |
|---|-------------|------------|------------|

**TS<sub>xii</sub>**

E (M06-D3-CPCM/BS1) = -3151.9244875 au

H (M06-D3-CPCM/BS1) = -3151.378334 au

G (M06-D3-CPCM/BS1) = -3151.494583 au

E (M06-D3-SMD/BS2//M06-D3-CPCM/BS1) = -3153.07734639 au

|    |             |             |             |
|----|-------------|-------------|-------------|
| C  | 0.96103200  | -4.28709700 | 0.10291900  |
| C  | 0.25193300  | -4.80539800 | 1.18239900  |
| C  | -0.93081300 | -4.19323200 | 1.56705400  |
| C  | -1.39237300 | -3.07454800 | 0.87891300  |
| C  | 0.46157500  | -3.16903500 | -0.53917400 |
| H  | 1.88640600  | -4.73679300 | -0.24495300 |
| H  | 0.61672500  | -5.68280100 | 1.71175900  |
| H  | -1.53514700 | -4.55289900 | 2.39457300  |
| H  | 0.97198500  | -2.73058800 | -1.39394500 |
| C  | -2.73258000 | -2.43476000 | 1.27827500  |
| O  | -3.21673600 | -2.83542800 | 2.34327200  |
| O  | -3.19230000 | -1.58690300 | 0.46639200  |
| Au | -1.33450100 | -0.87327700 | -1.23890200 |
| Cl | -1.83756700 | 0.93010600  | -2.69219100 |
| Cl | -1.99487800 | -2.50002300 | -2.96038400 |
| C  | -0.59900200 | -0.86215600 | 3.75443000  |
| C  | -1.02448100 | -0.19683000 | 2.61045200  |
| C  | -0.19941800 | -0.09571400 | 1.48040100  |
| C  | 1.07261600  | -0.69009100 | 1.54768500  |
| C  | 1.49650300  | -1.35250100 | 2.68989400  |
| C  | 0.66273100  | -1.44234000 | 3.80328600  |
| H  | -1.26880800 | -0.92851700 | 4.60916000  |
| H  | -2.01944600 | 0.23961900  | 2.60747400  |
| H  | 1.73718300  | -0.65653900 | 0.68883700  |
| H  | 2.48499700  | -1.81012100 | 2.70404700  |
| H  | 0.99467400  | -1.96469600 | 4.69814900  |
| C  | -0.67125700 | 0.60317400  | 0.23652100  |
| C  | 0.35765300  | 1.56567700  | -0.35114300 |
| S  | 2.90386900  | 2.35055400  | -0.38563000 |
| O  | 3.16646700  | 3.14345900  | -1.57889500 |
| O  | 2.56819200  | 2.98459400  | 0.87782400  |
| C  | 4.24509500  | 1.22967400  | -0.12866900 |
| C  | 5.18267700  | 1.01901500  | -1.13509700 |
| C  | 4.32904000  | 0.56918900  | 1.09703700  |
| C  | 6.21634300  | 0.11945900  | -0.90622700 |
| H  | 5.10175700  | 1.55219800  | -2.08017200 |
| C  | 5.36548900  | -0.32777700 | 1.30256000  |

|   |             |             |             |
|---|-------------|-------------|-------------|
| H | 3.59274300  | 0.76059200  | 1.87618900  |
| C | 6.32215800  | -0.56540600 | 0.30757900  |
| H | 6.95615700  | -0.05694400 | -1.68602800 |
| H | 5.44156300  | -0.85349500 | 2.25415300  |
| C | 7.45103800  | -1.51734500 | 0.55486500  |
| H | 7.13278100  | -2.36442800 | 1.17416900  |
| H | 7.86317300  | -1.90769100 | -0.38260000 |
| H | 8.27016400  | -1.01701600 | 1.08982600  |
| N | 1.64288000  | 1.21756000  | -0.71714800 |
| C | 1.92253100  | 0.27284600  | -1.80653800 |
| H | 2.51514300  | -0.58271400 | -1.45870600 |
| H | 0.97698300  | -0.07630500 | -2.23167500 |
| H | 2.46182900  | 0.78888200  | -2.61032700 |
| N | -0.67799800 | -2.57920200 | -0.14140500 |
| C | -1.81656700 | 1.54790400  | 0.40924900  |
| C | -1.32412300 | 2.83678300  | 0.08349200  |
| C | -2.10628900 | 3.98781700  | 0.15636400  |
| C | -3.41693900 | 3.80159700  | 0.63318100  |
| C | -3.93793600 | 2.49308500  | 0.91209700  |
| C | -3.13830400 | 1.35262800  | 0.76619900  |
| C | -3.34819100 | 3.47136500  | 2.52819000  |
| H | -4.99669900 | 2.39335600  | 1.14711100  |
| H | -3.53785500 | 0.34818500  | 0.91935500  |
| H | -4.26377200 | 3.93256000  | 2.92405000  |
| C | -1.56178100 | 5.32644700  | -0.19723800 |
| H | -2.31190500 | 6.11321500  | -0.06998000 |
| H | -0.68740600 | 5.56693800  | 0.42158600  |
| H | -1.21792300 | 5.33538500  | -1.23956100 |
| N | -0.02054500 | 2.80996600  | -0.36727700 |
| O | -2.34366700 | 3.17913800  | 3.05983400  |
| H | -4.10624500 | 4.64745100  | 0.63424600  |

**TS**<sub>xii-xiv</sub>

E (M06-D3-CPCM/BS1) = -3590.62497477 au

H (M06-D3-CPCM/BS1) = -3589.93832 au

G (M06-D3-CPCM/BS1) = -3590.073818 au

E (M06-D3-SMD/BS2//M06-D3-CPCM/BS1) = -3591.95031494 au

|   |             |            |             |
|---|-------------|------------|-------------|
| C | -1.68471300 | 4.88019000 | -0.42902200 |
| C | -0.68385500 | 5.79673300 | -0.12518800 |
| C | 0.62333400  | 5.34816400 | -0.01689300 |
| C | 0.91225400  | 3.99707100 | -0.17606400 |
| C | -1.33599900 | 3.55175500 | -0.59664100 |
| H | -2.72178400 | 5.18012700 | -0.54733200 |
| H | -0.92137600 | 6.84917100 | 0.01225700  |

|    |             |             |             |
|----|-------------|-------------|-------------|
| H  | 1.45535000  | 6.01419600  | 0.19131700  |
| H  | -2.08487900 | 2.81286500  | -0.86903100 |
| C  | 2.36064400  | 3.51379100  | -0.00792300 |
| O  | 3.22415500  | 4.39678700  | -0.05205400 |
| O  | 2.49452200  | 2.27545700  | 0.18705000  |
| Au | 0.40164100  | 1.06372000  | -0.80738000 |
| Cl | 0.80708100  | -1.15984400 | -1.48459000 |
| Cl | 1.00673100  | 1.86285100  | -3.05334400 |
| C  | -0.73555800 | 3.48372700  | 3.16267800  |
| C  | -0.16607400 | 2.45300400  | 2.43254100  |
| C  | -0.94395400 | 1.38769500  | 1.94804000  |
| C  | -2.31356700 | 1.38538300  | 2.25395600  |
| C  | -2.88147100 | 2.41849100  | 2.99326500  |
| C  | -2.10047800 | 3.47439800  | 3.44655300  |
| H  | -0.10811900 | 4.30478500  | 3.50483700  |
| H  | 0.89065200  | 2.50513100  | 2.18690200  |
| H  | -2.95028100 | 0.56540000  | 1.93045200  |
| H  | -3.94614700 | 2.38840100  | 3.21617400  |
| H  | -2.54826100 | 4.28418400  | 4.01893000  |
| C  | -0.30996300 | 0.28417400  | 1.15020500  |
| C  | -1.15202300 | -0.96734300 | 0.90187600  |
| S  | -3.17676700 | -2.53130400 | 0.18312500  |
| O  | -2.54052000 | -3.26607300 | -0.90232900 |
| O  | -3.26322800 | -3.09051800 | 1.52112300  |
| C  | -4.80072200 | -2.05170500 | -0.31783000 |
| C  | -5.19635300 | -2.23972700 | -1.63814100 |
| C  | -5.65788400 | -1.50038900 | 0.63375300  |
| C  | -6.48217300 | -1.86627400 | -2.00736100 |
| H  | -4.50317200 | -2.66654300 | -2.36003300 |
| C  | -6.93378400 | -1.12691600 | 0.24149400  |
| H  | -5.32614200 | -1.36578000 | 1.66214800  |
| C  | -7.36494900 | -1.30703400 | -1.07911300 |
| H  | -6.80746600 | -2.00687100 | -3.03741600 |
| H  | -7.61503600 | -0.68915100 | 0.97030000  |
| C  | -8.75643100 | -0.92643300 | -1.47961300 |
| H  | -9.46294300 | -1.73328700 | -1.24023100 |
| H  | -9.09716300 | -0.03145600 | -0.94553300 |
| H  | -8.82884600 | -0.73741500 | -2.55667500 |
| N  | -2.40518900 | -0.96990000 | 0.31636600  |
| C  | -2.72196600 | -0.01515700 | -0.74667800 |
| H  | -3.80445000 | 0.09300200  | -0.84495500 |
| H  | -2.33185100 | 0.95983400  | -0.45091000 |
| H  | -2.28158800 | -0.31290700 | -1.70916700 |
| N  | -0.07378200 | 3.12453500  | -0.44231400 |

|   |             |             |             |
|---|-------------|-------------|-------------|
| C | 0.90650600  | -0.34611000 | 1.74555300  |
| C | 0.62969300  | -1.73011900 | 1.84401800  |
| C | 1.52752900  | -2.63212000 | 2.38064900  |
| C | 2.84559700  | -2.10783300 | 2.71734300  |
| C | 3.05154400  | -0.67512900 | 2.71417200  |
| C | 2.12438800  | 0.18796200  | 2.19320900  |
| C | 3.73542600  | -2.88806100 | 3.65735800  |
| H | 4.01703700  | -0.31690700 | 3.06695700  |
| H | 2.36510900  | 1.23834600  | 2.07515100  |
| H | 3.40904700  | -3.92608000 | 3.87359900  |
| C | 1.20745500  | -4.08027400 | 2.47967500  |
| H | 1.14890000  | -4.39920300 | 3.53039300  |
| H | 0.24502400  | -4.28783400 | 2.00443100  |
| H | 1.97856200  | -4.69558000 | 1.99732100  |
| N | -0.61687000 | -2.06213700 | 1.33396800  |
| O | 4.74552800  | -2.42988100 | 4.12960200  |
| H | 3.36228600  | -2.31613700 | 1.63837800  |
| C | 3.62660300  | -2.92608600 | -2.18326900 |
| C | 4.02599400  | -2.07867500 | -1.10171900 |
| C | 4.62652900  | -0.80575000 | -1.32919700 |
| C | 4.77563000  | -0.45805300 | -2.64605300 |
| C | 4.37030500  | -1.29154300 | -3.73654000 |
| C | 3.80593900  | -2.51635600 | -3.53169300 |
| C | 3.09260400  | -4.01806000 | -1.54878200 |
| H | 4.52787200  | -0.92855200 | -4.74985400 |
| H | 3.50075900  | -3.15596700 | -4.35558300 |
| H | 2.64446800  | -4.94231400 | -1.89032700 |
| C | 5.02221900  | 0.07262200  | -0.18880800 |
| H | 4.15977400  | 0.64745100  | 0.18467300  |
| H | 5.43214000  | -0.51408100 | 0.64488500  |
| H | 5.78061300  | 0.79969400  | -0.50207900 |
| N | 3.75315500  | -2.64915300 | 0.06927800  |
| O | 3.16017600  | -3.85953400 | -0.23023800 |
| H | 5.22978400  | 0.50589700  | -2.87729800 |

**xiii**

E (M06-D3-CPCM/BS1) = -439.091933076 au

H (M06-D3-CPCM/BS1) = -438.937242 au

G (M06-D3-CPCM/BS1) = -438.979156 au

E (M06-D3-SMD/BS2//M06-D3-CPCM/BS1) = -439.277365218 au

|   |             |             |             |
|---|-------------|-------------|-------------|
| H | 1.19461700  | -2.35299200 | -0.00025300 |
| C | 0.77451600  | 0.85057500  | -0.00020700 |
| C | 0.15527300  | -0.43342600 | -0.00011600 |
| C | -1.24359300 | -0.61658700 | -0.00002300 |

|   |             |             |             |
|---|-------------|-------------|-------------|
| C | -1.96123900 | 0.55892800  | 0.00010300  |
| C | -1.37081700 | 1.85646600  | 0.00006100  |
| C | -0.01589900 | 2.02733800  | -0.00007900 |
| C | 2.12567200  | 0.58376300  | 0.00011500  |
| H | -2.02721300 | 2.72249200  | 0.00019800  |
| H | 0.44770500  | 3.00898900  | -0.00023900 |
| H | 3.01270300  | 1.20432200  | 0.00010500  |
| C | -1.85576800 | -1.97841400 | 0.00001800  |
| H | -1.55308500 | -2.55413600 | -0.88518300 |
| H | -1.55384100 | -2.55371700 | 0.88576400  |
| H | -2.94801100 | -1.91139900 | -0.00043900 |
| N | 1.14421400  | -1.33924800 | -0.00012400 |
| O | 2.35216300  | -0.72145200 | 0.00019100  |
| H | -3.04854800 | 0.49093200  | 0.00016000  |

**xiv**

E (M06-D3-CPCM/BS1) = -3151.55534713 au

H (M06-D3-CPCM/BS1) = -3151.018746 au

G (M06-D3-CPCM/BS1) = -3151.135951 au

E (M06-D3-SMD/BS2//M06-D3-CPCM/BS1) = -3152.69726132 au

|    |             |             |             |
|----|-------------|-------------|-------------|
| C  | -2.27382000 | 3.71444700  | -0.29279200 |
| C  | -1.80939900 | 4.57098700  | 0.70129000  |
| C  | -0.51752400 | 4.41178200  | 1.17758800  |
| C  | 0.29619300  | 3.40564700  | 0.66285300  |
| C  | -1.42593900 | 2.72783100  | -0.76210000 |
| H  | -3.27505400 | 3.80346500  | -0.70442100 |
| H  | -2.44989900 | 5.35776600  | 1.09413900  |
| H  | -0.09300600 | 5.04996100  | 1.94677600  |
| H  | -1.73679400 | 2.03342900  | -1.54021700 |
| C  | 1.74614300  | 3.26916600  | 1.16666400  |
| O  | 2.03648600  | 3.99271200  | 2.12974400  |
| O  | 2.47145900  | 2.45639800  | 0.53841100  |
| Au | 1.03698100  | 1.06626100  | -1.15617300 |
| Cl | 2.18291200  | -0.57108300 | -2.44671200 |
| Cl | 1.29053700  | 2.70683600  | -3.02177600 |
| C  | 0.11303500  | 1.29216000  | 3.83222700  |
| C  | 0.75145900  | 0.66015000  | 2.77102600  |
| C  | 0.04312600  | 0.27738000  | 1.62240500  |
| C  | -1.33651100 | 0.54920200  | 1.58587900  |
| C  | -1.97298900 | 1.17520600  | 2.64701700  |
| C  | -1.25098000 | 1.55457000  | 3.77788700  |
| H  | 0.69292200  | 1.58039500  | 4.70693500  |
| H  | 1.81577500  | 0.45752200  | 2.84593800  |
| H  | -1.90805300 | 0.28520600  | 0.69945600  |

|   |             |             |             |
|---|-------------|-------------|-------------|
| H | -3.04092200 | 1.38443800  | 2.58145600  |
| H | -1.74977800 | 2.05152300  | 4.60783700  |
| C | 0.73616400  | -0.39264700 | 0.48064600  |
| C | 0.02965900  | -1.59214600 | -0.11650800 |
| S | -2.27304600 | -2.84002000 | 0.08320900  |
| O | -2.27318500 | -3.99491900 | -0.81045800 |
| O | -1.86158000 | -2.98396500 | 1.47334800  |
| C | -3.88501700 | -2.10727100 | 0.03688300  |
| C | -4.74440500 | -2.37957200 | -1.02338700 |
| C | -4.27259300 | -1.27666800 | 1.08766000  |
| C | -6.00256800 | -1.78884100 | -1.03667400 |
| H | -4.43297000 | -3.05069900 | -1.82152100 |
| C | -5.53157500 | -0.69711800 | 1.05611800  |
| H | -3.59448100 | -1.09645500 | 1.92008500  |
| C | -6.41279700 | -0.94190000 | -0.00408300 |
| H | -6.68186700 | -1.99158700 | -1.86397800 |
| H | -5.84405400 | -0.04469300 | 1.87159000  |
| C | -7.77878000 | -0.32754400 | -0.00987000 |
| H | -8.46218400 | -0.89002600 | 0.64131600  |
| H | -7.75560800 | 0.70320000  | 0.36448400  |
| H | -8.21449800 | -0.32068300 | -1.01544600 |
| N | -1.31830900 | -1.57746400 | -0.56456000 |
| C | -1.47519600 | -1.41822200 | -2.01847200 |
| H | -2.53714900 | -1.29599900 | -2.25840600 |
| H | -0.94688700 | -0.50982500 | -2.32826600 |
| H | -1.05885700 | -2.27556000 | -2.56552200 |
| N | -0.18114200 | 2.58142400  | -0.27957300 |
| C | 2.08707300  | -0.98089000 | 0.71442500  |
| C | 2.00474100  | -2.33582500 | 0.35189500  |
| C | 3.08274600  | -3.21096200 | 0.43925100  |
| C | 4.29268400  | -2.64996100 | 0.90196800  |
| C | 4.38561200  | -1.29075900 | 1.23064000  |
| C | 3.29431600  | -0.43635600 | 1.13852500  |
| C | 5.50272500  | -3.47503000 | 1.03883900  |
| H | 5.35394400  | -0.91673800 | 1.55861600  |
| H | 3.38565200  | 0.63222700  | 1.32909300  |
| H | 5.38832300  | -4.54416600 | 0.75498400  |
| C | 2.92900300  | -4.64867800 | 0.04295300  |
| H | 3.15245000  | -5.32925600 | 0.87478100  |
| H | 1.90160200  | -4.83883800 | -0.28125400 |
| H | 3.59814200  | -4.91702400 | -0.78504600 |
| N | 0.73569100  | -2.66588800 | -0.15244000 |
| O | 6.57815200  | -3.06210500 | 1.43254300  |

**xv**

E (M06-D3-CPCM/BS1) = -3590.68005358 au

H (M06-D3-CPCM/BS1) = -3589.986629 au

G (M06-D3-CPCM/BS1) = -3590.123840 au

E (M06-D3-SMD/BS2//M06-D3-CPCM/BS1) = -3592.00730159 au

|    |             |             |             |
|----|-------------|-------------|-------------|
| Au | 1.86591500  | -0.80938500 | -1.29388000 |
| Cl | 0.17170000  | -2.33160700 | -1.97912000 |
| Cl | 2.96135300  | -1.01157500 | -3.51265200 |
| C  | 3.16216900  | 0.86209200  | 3.27762500  |
| C  | 2.44107500  | -0.04611000 | 2.51195200  |
| C  | 1.58382100  | 0.38623100  | 1.48836900  |
| C  | 1.47374900  | 1.77057200  | 1.27241800  |
| C  | 2.19107000  | 2.67654700  | 2.03964000  |
| C  | 3.04267200  | 2.22782800  | 3.04745400  |
| H  | 3.82441800  | 0.49192100  | 4.05761100  |
| H  | 2.54934700  | -1.10675300 | 2.71889200  |
| H  | 0.83733800  | 2.14985100  | 0.47729600  |
| H  | 2.08801600  | 3.74229300  | 1.83979600  |
| H  | 3.60915500  | 2.93912800  | 3.64521200  |
| C  | 0.83757600  | -0.60270800 | 0.65003700  |
| C  | -0.62908200 | -0.27705600 | 0.40447300  |
| S  | -2.43270600 | 1.71127500  | 0.66485600  |
| O  | -3.57371500 | 1.68180000  | -0.24648600 |
| O  | -2.54668300 | 1.14111800  | 1.99820300  |
| C  | -1.86923100 | 3.38001100  | 0.78779500  |
| C  | -2.18448700 | 4.29428600  | -0.21523300 |
| C  | -1.12152300 | 3.75230100  | 1.90416200  |
| C  | -1.72917900 | 5.60033500  | -0.09552200 |
| H  | -2.78587700 | 3.98991400  | -1.06920400 |
| C  | -0.68102500 | 5.06362200  | 2.00480700  |
| H  | -0.89619500 | 3.02622300  | 2.68283900  |
| C  | -0.97513100 | 6.00376700  | 1.01081900  |
| H  | -1.96702400 | 6.32445800  | -0.87374700 |
| H  | -0.09784500 | 5.36803200  | 2.87369100  |
| C  | -0.51543400 | 7.42208400  | 1.14647900  |
| H  | -1.24158800 | 8.01134300  | 1.72354300  |
| H  | 0.44338900  | 7.48479900  | 1.67439100  |
| H  | -0.40680400 | 7.90595700  | 0.16904600  |
| N  | -1.12905300 | 0.92200200  | -0.10691100 |
| C  | -0.82623800 | 1.38882300  | -1.46443200 |
| H  | -0.17461400 | 2.27369400  | -1.45994700 |
| H  | -0.34490300 | 0.57787500  | -2.02070200 |
| H  | -1.76015200 | 1.63404300  | -1.98349100 |
| C  | 0.71276900  | -1.99972000 | 1.16584100  |



|   |             |             |             |
|---|-------------|-------------|-------------|
| C | -0.65532000 | -2.27889900 | 1.27405300  |
| C | -1.15933800 | -3.49191400 | 1.73555500  |
| C | -0.19709900 | -4.46958600 | 2.05980800  |
| C | 1.17352000  | -4.20615900 | 1.92369100  |
| C | 1.64933900  | -2.98203000 | 1.47593000  |
| C | -0.58651200 | -5.81395500 | 2.52101200  |
| H | 1.86642500  | -5.00697900 | 2.17488500  |
| H | 2.71179300  | -2.80869000 | 1.31049200  |
| H | -1.67841200 | -6.01077900 | 2.57899200  |
| C | -2.64166900 | -3.68856900 | 1.84135100  |
| H | -2.92750600 | -4.35490500 | 2.66067700  |
| H | -3.13240700 | -2.72566300 | 2.02384000  |
| H | -3.06139500 | -4.10499600 | 0.91421600  |
| N | -1.43294800 | -1.21477000 | 0.79256300  |
| O | 0.20350500  | -6.68930900 | 2.81966000  |
| H | -2.99321900 | -1.29607600 | 0.04756900  |
| C | -5.38276700 | -0.50504800 | -2.02187200 |
| C | -5.03597500 | -0.82451600 | -0.67891400 |
| C | -5.92977900 | -0.66608900 | 0.40310700  |
| C | -7.17339200 | -0.20012000 | 0.04679400  |
| C | -7.55614100 | 0.09968400  | -1.29429200 |
| C | -6.68529600 | -0.04100000 | -2.33671800 |
| C | -4.22186100 | -0.72496500 | -2.72976900 |
| H | -8.56673300 | 0.45670200  | -1.47546500 |
| H | -6.96192200 | 0.19413900  | -3.36012800 |
| H | -3.95193200 | -0.63384900 | -3.77430000 |
| C | -5.50620800 | -0.97025300 | 1.80084700  |
| H | -5.32675300 | -2.04630400 | 1.93562600  |
| H | -4.57521800 | -0.44079300 | 2.05627900  |
| H | -6.27603300 | -0.66796000 | 2.51817900  |
| N | -3.76938300 | -1.25992600 | -0.67254300 |
| O | -3.25502500 | -1.14738100 | -1.93171100 |
| H | -7.90738400 | -0.04526100 | 0.83699500  |
| C | 3.91437700  | 3.01345400  | -1.47485800 |
| C | 5.05146200  | 2.86010900  | -0.68669200 |
| C | 5.27836100  | 1.64292700  | -0.06415400 |
| C | 4.37441100  | 0.59682700  | -0.23006800 |
| C | 3.04654000  | 1.94368300  | -1.59616500 |
| H | 3.69760200  | 3.94261400  | -1.99394600 |
| H | 5.75542200  | 3.68100500  | -0.56848400 |
| H | 6.14944800  | 1.45445300  | 0.55637700  |
| H | 2.15040300  | 2.00797500  | -2.21007400 |
| C | 4.66897600  | -0.76988500 | 0.41117100  |
| O | 5.59666600  | -0.78219600 | 1.23080000  |

|   |            |             |             |
|---|------------|-------------|-------------|
| O | 3.94692300 | -1.72088600 | 0.01298400  |
| N | 3.27377200 | 0.77597200  | -0.97234600 |

**xvi**

E (M06-D3-CPCM/BS1) = -3152.00005161 au

H (M06-D3-CPCM/BS1) = -3151.450133 au

G (M06-D3-CPCM/BS1) = -3151.566574 au

E (M06-D3-SMD/BS2//M06-D3-CPCM/BS1) = -3153.15531895 au

|    |             |             |             |
|----|-------------|-------------|-------------|
| Au | -1.75743100 | -0.77359900 | -0.90107000 |
| Cl | -2.25658200 | 1.12844900  | -2.23095400 |
| Cl | -3.39917000 | -2.13243600 | -2.10474200 |
| C  | 1.08185700  | -0.95909800 | 3.35758400  |
| C  | 0.33986800  | -0.20668400 | 2.45384900  |
| C  | 0.53923300  | -0.33343500 | 1.07123700  |
| C  | 1.51889000  | -1.24119900 | 0.63506800  |
| C  | 2.25819400  | -1.99117500 | 1.53649700  |
| C  | 2.04320800  | -1.85514900 | 2.90704800  |
| H  | 0.89610500  | -0.84121300 | 4.42302200  |
| H  | -0.40148400 | 0.48664600  | 2.83990300  |
| H  | 1.70022800  | -1.39467100 | -0.42349500 |
| H  | 3.00364700  | -2.69144400 | 1.16225300  |
| H  | 2.61831400  | -2.44845700 | 3.61551400  |
| C  | -0.28428300 | 0.48342500  | 0.10303900  |
| C  | 0.60079700  | 1.20297200  | -0.90516800 |
| S  | 3.04923000  | 1.46622700  | -2.08239200 |
| O  | 3.48802300  | 0.92481700  | -3.35063300 |
| O  | 2.85646700  | 2.89682600  | -1.89265200 |
| C  | 3.99074700  | 0.79943200  | -0.75945100 |
| C  | 4.75733800  | -0.34139900 | -0.98837300 |
| C  | 3.87938000  | 1.37609900  | 0.50782900  |
| C  | 5.42703900  | -0.91183700 | 0.08543800  |
| H  | 4.83851500  | -0.76220300 | -1.98835200 |
| C  | 4.54789900  | 0.77946600  | 1.56350600  |
| H  | 3.29188100  | 2.27934500  | 0.66242300  |
| C  | 5.32145500  | -0.37266000 | 1.37112600  |
| H  | 6.04118100  | -1.79661400 | -0.07559900 |
| H  | 4.47176100  | 1.21214300  | 2.56030000  |
| C  | 5.99699200  | -1.02745300 | 2.53377500  |
| H  | 6.40098200  | -0.28649100 | 3.23373100  |
| H  | 5.27679800  | -1.64028700 | 3.09510500  |
| H  | 6.81145300  | -1.68613600 | 2.21294800  |
| N  | 1.48389900  | 0.69970700  | -1.80030900 |
| C  | 1.24453200  | -0.49439900 | -2.62224800 |
| H  | 2.00883300  | -1.26098600 | -2.45246600 |

|   |             |             |             |
|---|-------------|-------------|-------------|
| H | 0.25572900  | -0.89039500 | -2.38091600 |
| H | 1.24975800  | -0.20398000 | -3.67634700 |
| C | -1.03201700 | 1.63666700  | 0.71262100  |
| C | -0.48412100 | 2.83048100  | 0.24019500  |
| C | -0.88641400 | 4.10321100  | 0.62116900  |
| C | -1.95599700 | 4.12720000  | 1.53851500  |
| C | -2.53859000 | 2.94439900  | 2.00760000  |
| C | -2.09471200 | 1.69074200  | 1.60824000  |
| C | -2.51269400 | 5.40628900  | 2.02396900  |
| H | -3.36837000 | 3.03540000  | 2.70570600  |
| H | -2.57779400 | 0.77512600  | 1.94747400  |
| H | -2.04861500 | 6.32619900  | 1.60901100  |
| C | -0.23499300 | 5.34144300  | 0.08032000  |
| H | 0.07067700  | 6.02080700  | 0.88418300  |
| H | 0.66840800  | 5.11870500  | -0.49650000 |
| H | -0.91312300 | 5.89596700  | -0.58088300 |
| N | 0.49320500  | 2.50580500  | -0.71337500 |
| O | -3.42419500 | 5.48760600  | 2.82257600  |
| H | 1.02120300  | 3.17243300  | -1.27568300 |
| C | 0.07543300  | -4.67649900 | -0.34207800 |
| C | -0.18850600 | -5.01511400 | 0.98188700  |
| C | -0.93576800 | -4.14651500 | 1.76210700  |
| C | -1.40335000 | -2.95376400 | 1.21861200  |
| C | -0.40344800 | -3.47200700 | -0.82537500 |
| H | 0.64086600  | -5.33081100 | -0.99912300 |
| H | 0.17743000  | -5.95277000 | 1.39429200  |
| H | -1.18992200 | -4.35683200 | 2.79682900  |
| H | -0.23374500 | -3.17093000 | -1.85725500 |
| C | -2.30566800 | -2.03629300 | 2.05652700  |
| O | -2.35415900 | -2.29102900 | 3.26555500  |
| O | -2.91337000 | -1.14554700 | 1.40421800  |
| N | -1.10703400 | -2.63270600 | -0.04764200 |

**xvii**

E (M06-D3-CPCM/BS1) = -2914.5683151 au

H (M06-D3-CPCM/BS1) = -2913.688456 au

G (M06-D3-CPCM/BS1) = -2913.827206 au

E (M06-D3-SMD/BS2//M06-D3-CPCM/BS1) = -2915.83431854 au

|   |             |            |             |
|---|-------------|------------|-------------|
| C | -0.35588000 | 4.80950300 | -0.45345000 |
| C | -0.08213700 | 3.49023700 | -0.15754000 |
| C | -1.00488100 | 2.46599700 | -0.51004000 |
| C | -2.20170500 | 2.82412700 | -1.19243800 |
| C | -2.44607200 | 4.14115700 | -1.52018400 |
| C | -1.52972200 | 5.12959400 | -1.14291600 |

|   |             |             |             |
|---|-------------|-------------|-------------|
| H | 0.34018200  | 5.59423100  | -0.16788900 |
| H | 0.83224900  | 3.21000100  | 0.36519700  |
| H | -2.91735000 | 2.04614500  | -1.45907200 |
| H | -3.35007800 | 4.41388100  | -2.05871600 |
| H | -1.73558400 | 6.16930600  | -1.39035700 |
| C | -0.69053300 | 1.12319500  | -0.24529400 |
| C | -1.74011600 | 0.08750500  | -0.26086900 |
| S | -2.15980400 | -2.53566600 | -0.66697100 |
| O | -1.66505600 | -3.40652700 | -1.72525800 |
| O | -1.77460500 | -2.77255300 | 0.71620600  |
| C | -3.92005600 | -2.44715000 | -0.79167200 |
| C | -4.50640600 | -2.62277300 | -2.04297200 |
| C | -4.68841900 | -2.20125500 | 0.34449600  |
| C | -5.88881700 | -2.54301000 | -2.15095600 |
| H | -3.89278300 | -2.83472800 | -2.91639400 |
| C | -6.06710900 | -2.13719100 | 0.21571900  |
| H | -4.20789700 | -2.06392400 | 1.31021700  |
| C | -6.68640000 | -2.30271600 | -1.02864100 |
| H | -6.35994900 | -2.67714200 | -3.12401200 |
| H | -6.68076800 | -1.95032800 | 1.09673100  |
| C | -8.17849900 | -2.25031300 | -1.14512100 |
| H | -8.62457100 | -3.21758500 | -0.87488600 |
| H | -8.60692100 | -1.49973400 | -0.46998100 |
| H | -8.49616700 | -2.01792200 | -2.16798900 |
| N | -1.54403800 | -1.00238000 | -1.10413200 |
| C | -1.07107100 | -0.80797500 | -2.47566100 |
| H | -1.88979100 | -0.92950600 | -3.19583400 |
| H | -0.68715100 | 0.21525000  | -2.56079300 |
| H | -0.26116200 | -1.50260600 | -2.71494400 |
| C | -4.27975800 | 1.69372300  | 1.39036400  |
| C | -3.09200000 | 0.94478400  | 1.57338900  |
| C | -2.44560000 | 0.95904800  | 2.82616800  |
| C | -2.95532900 | 1.78005000  | 3.82952500  |
| C | -4.09890600 | 2.55638500  | 3.64656000  |
| C | -4.76221400 | 2.49232600  | 2.43484500  |
| C | -5.08776700 | 1.64025300  | 0.16920900  |
| H | -4.47320800 | 3.18155600  | 4.45361400  |
| H | -5.67842400 | 3.06112200  | 2.27345500  |
| H | -6.05123200 | 2.19479600  | 0.26396000  |
| C | -1.25230400 | 0.08976900  | 3.06356700  |
| H | -1.43289200 | -0.93711500 | 2.71289700  |
| H | -0.36838200 | 0.45456100  | 2.51409500  |
| H | -0.98898500 | 0.05828200  | 4.12716100  |
| N | -2.68529200 | 0.06369100  | 0.59178600  |

|    |             |             |             |
|----|-------------|-------------|-------------|
| O  | -4.81288300 | 1.07056800  | -0.87188700 |
| H  | -2.44273500 | 1.79544700  | 4.79170700  |
| Au | 1.17101900  | 0.35965500  | 0.22321500  |
| P  | 3.16252800  | -0.83326200 | 0.84537500  |
| C  | 3.82246400  | -0.13564700 | 2.48121700  |
| C  | 2.60761800  | -2.64476500 | 0.92103600  |
| C  | 2.63687000  | 0.22440600  | 3.38056600  |
| H  | 3.02445100  | 0.66754100  | 4.30957500  |
| H  | 1.97889700  | 0.96690200  | 2.90708800  |
| H  | 2.02862600  | -0.64489400 | 3.65833200  |
| C  | 4.55337900  | 1.15974900  | 2.11935200  |
| H  | 3.90237800  | 1.84963600  | 1.56112700  |
| H  | 4.85399700  | 1.66672200  | 3.04769500  |
| H  | 5.45860800  | 0.97959100  | 1.52569100  |
| C  | 4.76014900  | -1.06139100 | 3.25200200  |
| H  | 5.66080300  | -1.32618000 | 2.68609700  |
| H  | 5.09600500  | -0.53829200 | 4.15942200  |
| H  | 4.26159500  | -1.98324400 | 3.57773000  |
| C  | 1.55597700  | -2.78683300 | 2.02255200  |
| H  | 0.74843200  | -2.04589800 | 1.93012000  |
| H  | 1.09235500  | -3.78052900 | 1.93835700  |
| H  | 1.99386500  | -2.71469300 | 3.02688300  |
| C  | 1.95087200  | -2.92556200 | -0.43556300 |
| H  | 1.63811300  | -3.97979500 | -0.46860600 |
| H  | 1.05194300  | -2.31110500 | -0.59223300 |
| H  | 2.64110600  | -2.75418500 | -1.27434700 |
| C  | 3.70942300  | -3.68007000 | 1.14125500  |
| H  | 4.28996300  | -3.50852900 | 2.05603600  |
| H  | 3.23402500  | -4.66698800 | 1.23806600  |
| H  | 4.39873800  | -3.73655100 | 0.29079700  |
| C  | 4.55993100  | -0.76849100 | -0.34863200 |
| C  | 4.52462700  | 0.00905200  | -1.52363500 |
| C  | 5.71565800  | -1.52092300 | -0.07996600 |
| C  | 5.62427900  | -0.02444300 | -2.39113500 |
| C  | 6.80106100  | -1.53233600 | -0.94463000 |
| H  | 5.77500200  | -2.12022600 | 0.82390900  |
| C  | 6.75153600  | -0.78474200 | -2.11519300 |
| H  | 5.58347600  | 0.57650500  | -3.29905000 |
| H  | 7.67893700  | -2.12711800 | -0.70180800 |
| H  | 7.59020300  | -0.78643900 | -2.80850800 |
| C  | 3.42366900  | 0.92227600  | -1.94286200 |
| C  | 3.43237900  | 2.26054000  | -1.53406300 |
| C  | 2.48633100  | 0.51162100  | -2.89629800 |
| C  | 2.51342700  | 3.16513200  | -2.05738000 |

|   |            |             |             |
|---|------------|-------------|-------------|
| H | 4.18547600 | 2.59473100  | -0.81945000 |
| C | 1.57031400 | 1.42013900  | -3.42375900 |
| H | 2.49399000 | -0.52409400 | -3.23870300 |
| C | 1.57895800 | 2.74738100  | -3.00348800 |
| H | 2.53872000 | 4.20620800  | -1.73791600 |
| H | 0.86155000 | 1.09198300  | -4.18327900 |
| H | 0.86310500 | 3.45855500  | -3.41509900 |

**TS<sub>xvii-xviii</sub>**

E (M06-D3-CPCM/BS1) = -2913.670018 au

H (M06-D3-CPCM/BS1) = -2913.670018 au

G (M06-D3-CPCM/BS1) = -2913.807679 au

E (M06-D3-SMD/BS2//M06-D3-CPCM/BS1) = -2915.81432087 au

|   |             |             |             |
|---|-------------|-------------|-------------|
| C | 1.59244000  | -1.61840100 | 3.66804000  |
| C | 0.97631000  | -0.89678300 | 2.65885100  |
| C | 1.69765600  | -0.46890800 | 1.52228400  |
| C | 3.06844900  | -0.80489500 | 1.44810400  |
| C | 3.67223600  | -1.56253400 | 2.43682500  |
| C | 2.93756500  | -1.96727100 | 3.55161700  |
| H | 1.02219900  | -1.92313500 | 4.54306600  |
| H | -0.07756300 | -0.62491500 | 2.74500400  |
| H | 3.66753500  | -0.45606800 | 0.61118900  |
| H | 4.72591900  | -1.82146900 | 2.34735300  |
| H | 3.41719000  | -2.54894200 | 4.33622600  |
| C | 1.02559800  | 0.38434400  | 0.56369700  |
| C | 1.69012600  | 0.93578700  | -0.64676900 |
| S | 3.73606600  | 0.56237000  | -2.44783700 |
| O | 3.56737400  | -0.13157600 | -3.71450600 |
| O | 3.86360000  | 2.00298900  | -2.38608000 |
| C | 5.06395000  | -0.17722100 | -1.54874500 |
| C | 5.42263600  | -1.49749200 | -1.80724000 |
| C | 5.66772700  | 0.56027200  | -0.52893400 |
| C | 6.40166100  | -2.08905300 | -1.01765500 |
| H | 4.95067600  | -2.05000200 | -2.61727600 |
| C | 6.64309000  | -0.05055400 | 0.24362800  |
| H | 5.35779200  | 1.58488700  | -0.33354500 |
| C | 7.02049400  | -1.38087000 | 0.01557500  |
| H | 6.69325000  | -3.12075900 | -1.20916100 |
| H | 7.12486700  | 0.51115900  | 1.04348200  |
| C | 8.07049000  | -2.01860600 | 0.87143400  |
| H | 8.23534100  | -3.06665600 | 0.59903100  |
| H | 9.02772800  | -1.48880500 | 0.77881400  |
| H | 7.78935500  | -1.98137700 | 1.93242100  |
| N | 2.36633900  | 0.08106600  | -1.48874500 |

|    |             |             |             |
|----|-------------|-------------|-------------|
| C  | 2.02717800  | -1.34052800 | -1.55592900 |
| H  | 2.65439400  | -1.95791600 | -0.89688900 |
| H  | 0.97837000  | -1.46439200 | -1.26300400 |
| H  | 2.13490800  | -1.67939200 | -2.59025000 |
| C  | 1.18727100  | 2.49608900  | 1.37974600  |
| C  | 0.95573500  | 2.89971500  | 0.02252900  |
| C  | 0.03818600  | 3.93830200  | -0.27252800 |
| C  | -0.73271900 | 4.41906100  | 0.76983300  |
| C  | -0.60873900 | 3.94110500  | 2.09387600  |
| C  | 0.34173000  | 3.00100500  | 2.40235400  |
| C  | 2.56343200  | 2.17071700  | 1.85863700  |
| H  | -1.24328100 | 4.35865000  | 2.87273500  |
| H  | 0.51455800  | 2.69450800  | 3.43432000  |
| H  | 2.57508800  | 1.82410800  | 2.91807800  |
| C  | -0.13790000 | 4.39997500  | -1.68317800 |
| H  | 0.81493200  | 4.73942100  | -2.10877100 |
| H  | -0.49470100 | 3.58351900  | -2.32614200 |
| H  | -0.86037100 | 5.22195700  | -1.73878000 |
| N  | 1.51188500  | 2.19001400  | -0.98651400 |
| O  | 3.58328600  | 2.29928800  | 1.22247200  |
| H  | -1.48355600 | 5.18009100  | 0.55352800  |
| Au | -1.06796100 | 0.20342200  | 0.30144600  |
| P  | -3.43703300 | 0.17177000  | -0.12691700 |
| C  | -4.30397300 | 0.85578200  | 1.41880400  |
| C  | -3.64412800 | 1.24244200  | -1.68384000 |
| C  | -3.47089100 | 2.00648600  | 1.98980200  |
| H  | -3.92903700 | 2.33440000  | 2.93463900  |
| H  | -2.43731600 | 1.70093400  | 2.21030700  |
| H  | -3.43256300 | 2.87677300  | 1.32387500  |
| C  | -4.29983900 | -0.28302900 | 2.44141600  |
| H  | -3.27719100 | -0.62473100 | 2.66164100  |
| H  | -4.73385900 | 0.08488700  | 3.38235200  |
| H  | -4.89440100 | -1.14544900 | 2.11238700  |
| C  | -5.73380000 | 1.34924000  | 1.20667200  |
| H  | -6.42202800 | 0.54816400  | 0.91503200  |
| H  | -6.10532400 | 1.75446900  | 2.15930300  |
| H  | -5.79507300 | 2.15782400  | 0.46698700  |
| C  | -3.23434500 | 2.67554900  | -1.34985700 |
| H  | -2.26919100 | 2.71943300  | -0.82593500 |
| H  | -3.13154200 | 3.24182900  | -2.28760800 |
| H  | -3.98667200 | 3.19269000  | -0.73942700 |
| C  | -2.65590900 | 0.65902300  | -2.70203700 |
| H  | -2.77607000 | 1.18776000  | -3.65906000 |
| H  | -1.60995500 | 0.78097000  | -2.38125700 |

|   |             |             |             |
|---|-------------|-------------|-------------|
| H | -2.83523800 | -0.41065400 | -2.88714300 |
| C | -5.02978300 | 1.26703600  | -2.32736000 |
| H | -5.81862100 | 1.60937700  | -1.64599100 |
| H | -4.99801800 | 1.97693500  | -3.16679700 |
| H | -5.31662100 | 0.29259000  | -2.73861500 |
| C | -4.26466300 | -1.42400300 | -0.53688500 |
| C | -3.59128400 | -2.65949400 | -0.63296300 |
| C | -5.63342300 | -1.38895500 | -0.85416000 |
| C | -4.29352300 | -3.77780800 | -1.10467500 |
| C | -6.32048100 | -2.51349100 | -1.28835700 |
| H | -6.18282300 | -0.45594900 | -0.78091300 |
| C | -5.63907300 | -3.71547900 | -1.43461400 |
| H | -3.76005100 | -4.72458700 | -1.18167100 |
| H | -7.38081900 | -2.44230400 | -1.52073900 |
| H | -6.15492400 | -4.60554300 | -1.78915900 |
| C | -2.19580600 | -2.93555700 | -0.20306100 |
| C | -1.88193700 | -2.98970400 | 1.15941700  |
| C | -1.23783400 | -3.34674700 | -1.13460300 |
| C | -0.63533100 | -3.44062700 | 1.58008900  |
| H | -2.64029500 | -2.71552600 | 1.89334500  |
| C | 0.01256000  | -3.79104700 | -0.71189400 |
| H | -1.48653300 | -3.33312900 | -2.19637200 |
| C | 0.31959500  | -3.83432500 | 0.64581100  |
| H | -0.41427900 | -3.49908400 | 2.64437300  |
| H | 0.74753000  | -4.11379900 | -1.44884000 |
| H | 1.29757300  | -4.18202800 | 0.97791700  |

**xviii**

E (M06-D3-CPCM/BS1) = -2914.58386114 au

H (M06-D3-CPCM/BS1) = -2913.702079 au

G (M06-D3-CPCM/BS1) = -2913.841027 au

E (M06-D3-SMD/BS2//M06-D3-CPCM/BS1) = -2915.84998539 au

|   |             |            |            |
|---|-------------|------------|------------|
| C | -0.80400700 | 4.16078800 | 2.62383900 |
| C | -0.56965700 | 2.84322500 | 2.24713000 |
| C | -1.37240300 | 2.21398200 | 1.28804500 |
| C | -2.43285500 | 2.94078300 | 0.72990100 |
| C | -2.65303000 | 4.26708600 | 1.08702000 |
| C | -1.83968100 | 4.88162400 | 2.03505300 |
| H | -0.16638400 | 4.62943100 | 3.37187400 |
| H | 0.25918500  | 2.28975000 | 2.69248300 |
| H | -3.11203000 | 2.45543800 | 0.02676100 |
| H | -3.47626500 | 4.81589100 | 0.63370700 |
| H | -2.01817500 | 5.91639800 | 2.32065300 |
| C | -1.16222900 | 0.76251800 | 0.99212400 |



|    |             |             |             |
|----|-------------|-------------|-------------|
| C  | -1.65570700 | 0.10861300  | -0.20692100 |
| S  | -2.53225100 | -0.26976800 | -2.73810700 |
| O  | -2.59254000 | 0.71674100  | -3.80552300 |
| O  | -1.85343300 | -1.53336300 | -2.96146600 |
| C  | -4.14750200 | -0.51095000 | -2.07639100 |
| C  | -4.98414200 | 0.59798000  | -1.97414400 |
| C  | -4.55706500 | -1.78121700 | -1.68013400 |
| C  | -6.25820300 | 0.42293800  | -1.45082100 |
| H  | -4.64770700 | 1.57990800  | -2.30526500 |
| C  | -5.83500200 | -1.93285300 | -1.16529400 |
| H  | -3.87776500 | -2.62547700 | -1.77014200 |
| C  | -6.69904100 | -0.83795400 | -1.03790800 |
| H  | -6.92504300 | 1.27937500  | -1.36308400 |
| H  | -6.17473800 | -2.91979200 | -0.85142100 |
| C  | -8.07148900 | -1.02896700 | -0.47118100 |
| H  | -8.62564500 | -0.08540400 | -0.42202500 |
| H  | -8.65329000 | -1.73389000 | -1.07951000 |
| H  | -8.02305000 | -1.44896400 | 0.54203700  |
| N  | -1.72358000 | 0.62257600  | -1.45635900 |
| C  | -1.03149300 | 1.84645700  | -1.85735900 |
| H  | -1.70728400 | 2.70921800  | -1.88131400 |
| H  | -0.21977300 | 2.03730900  | -1.14695000 |
| H  | -0.59490500 | 1.70459000  | -2.85015800 |
| C  | -1.69304100 | -0.23538800 | 2.07258700  |
| C  | -1.96194400 | -1.44095000 | 1.25578900  |
| C  | -2.06447500 | -2.74021300 | 1.84025500  |
| C  | -1.61223300 | -2.85496100 | 3.12413000  |
| C  | -1.08310900 | -1.74596300 | 3.88444400  |
| C  | -1.05963000 | -0.49356500 | 3.38453900  |
| C  | -3.10353800 | 0.39431400  | 2.41572300  |
| H  | -0.69816600 | -1.94458500 | 4.88223400  |
| H  | -0.70546200 | 0.35099000  | 3.97536800  |
| H  | -3.06234100 | 1.10237200  | 3.26898300  |
| C  | -2.55149900 | -3.88457800 | 1.01526300  |
| H  | -3.58964600 | -3.71954100 | 0.69505400  |
| H  | -1.95373900 | -3.99331700 | 0.09964000  |
| H  | -2.50785900 | -4.82428300 | 1.57569600  |
| N  | -2.05309500 | -1.19185900 | -0.03055300 |
| O  | -4.10451500 | 0.16994300  | 1.79540900  |
| H  | -1.61954700 | -3.83805200 | 3.59492100  |
| Au | 0.95359800  | 0.15582500  | 0.59023500  |
| P  | 2.86661800  | -1.14147300 | -0.00144000 |
| C  | 3.41156700  | -2.10286900 | 1.54676200  |
| C  | 2.23010100  | -2.25359300 | -1.40412000 |

|   |            |             |             |
|---|------------|-------------|-------------|
| C | 2.16677300 | -2.35599400 | 2.40441500  |
| H | 2.46495600 | -2.91768000 | 3.30226700  |
| H | 1.70340700 | -1.41715700 | 2.73925300  |
| H | 1.39944500 | -2.94476100 | 1.88443100  |
| C | 4.35023300 | -1.18242400 | 2.32919500  |
| H | 3.88655500 | -0.20580200 | 2.53163000  |
| H | 4.57287500 | -1.64777100 | 3.30029100  |
| H | 5.30186500 | -1.01225900 | 1.81115200  |
| C | 4.09183800 | -3.44928300 | 1.29687800  |
| H | 5.02296800 | -3.37468300 | 0.72455200  |
| H | 4.35576800 | -3.88383500 | 2.27211800  |
| H | 3.42889000 | -4.16571000 | 0.79581300  |
| C | 1.07683000 | -3.11479700 | -0.88779000 |
| H | 0.28506300 | -2.51343300 | -0.41705900 |
| H | 0.62036700 | -3.63707400 | -1.74185500 |
| H | 1.40823500 | -3.88091800 | -0.17412900 |
| C | 1.69780500 | -1.30353800 | -2.48221000 |
| H | 1.35400400 | -1.89913600 | -3.34040000 |
| H | 0.83691200 | -0.71661400 | -2.12921200 |
| H | 2.47205900 | -0.61171600 | -2.84325900 |
| C | 3.28918700 | -3.15213300 | -2.04199400 |
| H | 3.75226900 | -3.84667000 | -1.33157700 |
| H | 2.79987600 | -3.75811300 | -2.81822500 |
| H | 4.08044700 | -2.57320200 | -2.53285400 |
| C | 4.34790700 | -0.31208500 | -0.71285500 |
| C | 4.36746100 | 1.04032800  | -1.11576100 |
| C | 5.48042100 | -1.10153600 | -0.97081400 |
| C | 5.49406300 | 1.52362000  | -1.79633800 |
| C | 6.59840000 | -0.59733400 | -1.61955200 |
| H | 5.49084800 | -2.14588900 | -0.67206500 |
| C | 6.59878800 | 0.72430100  | -2.04962500 |
| H | 5.49769400 | 2.56748200  | -2.10795600 |
| H | 7.45777400 | -1.24062800 | -1.79548500 |
| H | 7.45999900 | 1.13585800  | -2.57202200 |
| C | 3.30717600 | 2.04698900  | -0.85027800 |
| C | 3.06927600 | 2.50615000  | 0.45112500  |
| C | 2.64746900 | 2.66649600  | -1.91528500 |
| C | 2.18793600 | 3.55844400  | 0.67813500  |
| H | 3.61159200 | 2.05758300  | 1.28441000  |
| C | 1.75567100 | 3.71165500  | -1.68518000 |
| H | 2.84387400 | 2.32829100  | -2.93326300 |
| C | 1.52027900 | 4.15797900  | -0.38786700 |
| H | 2.02991900 | 3.91964600  | 1.69272000  |
| H | 1.24471100 | 4.17972200  | -2.52573500 |

H 0.82314400 4.97496700 -0.20447400

**TS**<sub>xvii-xix</sub>

E (M06-D3-CPCM/BS1) = -2914.55624978 au

H (M06-D3-CPCM/BS1) = -2913.67547 au

G (M06-D3-CPCM/BS1) = -2913.816002 au

E (M06-D3-SMD/BS2//M06-D3-CPCM/BS1) = -2915.81849928 au

|   |             |             |             |
|---|-------------|-------------|-------------|
| C | 1.18412800  | -3.14129500 | 2.77476600  |
| C | 0.67649500  | -2.13573600 | 1.96815400  |
| C | 1.45162700  | -0.99741900 | 1.65016200  |
| C | 2.73501600  | -0.87509000 | 2.24387100  |
| C | 3.22719600  | -1.86611900 | 3.06698800  |
| C | 2.45876000  | -3.00806300 | 3.32095000  |
| H | 0.58483400  | -4.02415700 | 2.98601300  |
| H | -0.32183100 | -2.23074100 | 1.54130200  |
| H | 3.31427100  | 0.02868300  | 2.07166400  |
| H | 4.20910100  | -1.75750300 | 3.52243800  |
| H | 2.85586000  | -3.79177000 | 3.96328500  |
| C | 0.91569600  | -0.01817800 | 0.75197900  |
| C | 1.84375400  | 0.90068900  | 0.03038700  |
| S | 4.34495800  | 1.38739900  | -0.77470700 |
| O | 4.20829000  | 1.85965000  | -2.14824400 |
| O | 4.45212400  | 2.32908600  | 0.33041400  |
| C | 5.69934900  | 0.25403700  | -0.69916800 |
| C | 6.28308900  | -0.20132900 | -1.87703700 |
| C | 6.14987600  | -0.17198600 | 0.54985200  |
| C | 7.33774700  | -1.10155600 | -1.79594800 |
| H | 5.91231200  | 0.14580400  | -2.83924700 |
| C | 7.19896900  | -1.07624000 | 0.60873700  |
| H | 5.69180100  | 0.20775500  | 1.46172900  |
| C | 7.80875900  | -1.55114400 | -0.55923900 |
| H | 7.80428100  | -1.46617000 | -2.71033000 |
| H | 7.55925800  | -1.42085200 | 1.57747800  |
| C | 8.96262000  | -2.50182000 | -0.47978900 |
| H | 9.90909000  | -1.95364600 | -0.37288800 |
| H | 8.87614800  | -3.16773600 | 0.38678200  |
| H | 9.04271900  | -3.11564800 | -1.38423700 |
| N | 3.06003700  | 0.31951400  | -0.37513200 |
| C | 3.03867100  | -0.96196400 | -1.09307100 |
| H | 3.78523000  | -1.65312500 | -0.68544200 |
| H | 2.04770100  | -1.41093100 | -0.97997800 |
| H | 3.21193400  | -0.80806100 | -2.16713400 |
| C | 0.13699900  | 3.34936400  | 1.27740100  |
| C | 0.60668100  | 3.00411600  | -0.01317600 |

|    |             |             |             |
|----|-------------|-------------|-------------|
| C  | 0.16454700  | 3.76130800  | -1.12483300 |
| C  | -0.69195300 | 4.83535100  | -0.91434900 |
| C  | -1.11524600 | 5.21035400  | 0.36278200  |
| C  | -0.69058100 | 4.47192000  | 1.44910400  |
| C  | 0.47324400  | 2.61632800  | 2.48086500  |
| H  | -1.76638600 | 6.07090600  | 0.49578800  |
| H  | -1.00310200 | 4.73846700  | 2.45920400  |
| H  | 0.25969000  | 3.15267300  | 3.42940500  |
| C  | 0.63683900  | 3.40012800  | -2.49733200 |
| H  | 1.73410000  | 3.35938500  | -2.53846100 |
| H  | 0.28297800  | 2.40086800  | -2.79144200 |
| H  | 0.27803000  | 4.11993600  | -3.24123500 |
| N  | 1.62236100  | 2.11256600  | -0.29365500 |
| O  | 0.93200200  | 1.48017000  | 2.53873500  |
| H  | -1.02229300 | 5.41072200  | -1.77949500 |
| Au | -1.07596500 | -0.03237200 | 0.18651000  |
| P  | -3.48301000 | 0.09750000  | -0.05462400 |
| C  | -4.11810300 | 0.33841500  | 1.72653500  |
| C  | -3.93057500 | 1.51811500  | -1.22008600 |
| C  | -3.13895000 | 1.24431900  | 2.48372300  |
| H  | -3.51379800 | 1.38077400  | 3.50867000  |
| H  | -2.13702200 | 0.79738100  | 2.55434600  |
| H  | -3.03636200 | 2.23961400  | 2.03323600  |
| C  | -4.08586200 | -1.04689400 | 2.37919000  |
| H  | -3.10693200 | -1.53740500 | 2.25838000  |
| H  | -4.26756200 | -0.93311700 | 3.45771300  |
| H  | -4.85603300 | -1.71635500 | 1.97654700  |
| C  | -5.51768300 | 0.93655400  | 1.85590700  |
| H  | -6.29489500 | 0.32327400  | 1.38698400  |
| H  | -5.76843100 | 1.00152600  | 2.92491100  |
| H  | -5.57669500 | 1.95439400  | 1.44920500  |
| C  | -3.42991400 | 2.81682600  | -0.59467000 |
| H  | -2.37298300 | 2.75256800  | -0.30331400 |
| H  | -3.51566900 | 3.62548000  | -1.33586900 |
| H  | -4.01828400 | 3.11656400  | 0.28288100  |
| C  | -3.15201700 | 1.25633900  | -2.51222100 |
| H  | -3.33881700 | 2.08188900  | -3.21464800 |
| H  | -2.06698100 | 1.20304700  | -2.33936200 |
| H  | -3.47658400 | 0.32769500  | -3.00318700 |
| C  | -5.40856200 | 1.66428600  | -1.57662700 |
| H  | -6.05096900 | 1.81957800  | -0.70142700 |
| H  | -5.51641800 | 2.55072500  | -2.21874800 |
| H  | -5.78535200 | 0.80587400  | -2.14506500 |
| C  | -4.35813300 | -1.40034300 | -0.67907300 |

|   |             |             |             |
|---|-------------|-------------|-------------|
| C | -3.70689900 | -2.60459200 | -1.02355800 |
| C | -5.76314400 | -1.38117500 | -0.68273600 |
| C | -4.48751900 | -3.73091500 | -1.32401900 |
| C | -6.51812300 | -2.50164600 | -0.99801100 |
| H | -6.29201100 | -0.47018200 | -0.42096200 |
| C | -5.87330000 | -3.69148500 | -1.31290800 |
| H | -3.97627800 | -4.65453200 | -1.59262500 |
| H | -7.60424000 | -2.44183400 | -0.98864400 |
| H | -6.44525800 | -4.58446100 | -1.55658900 |
| C | -2.24044500 | -2.81225200 | -1.13226200 |
| C | -1.63164300 | -3.81525000 | -0.36919500 |
| C | -1.47564200 | -2.14203800 | -2.09482900 |
| C | -0.29439700 | -4.14615400 | -0.56578500 |
| H | -2.22273400 | -4.34608000 | 0.37781700  |
| C | -0.13825400 | -2.47661600 | -2.29552200 |
| H | -1.94442700 | -1.38515100 | -2.72322300 |
| C | 0.45338100  | -3.48359000 | -1.53605200 |
| H | 0.16169500  | -4.93246800 | 0.03369800  |
| H | 0.43586700  | -1.95925700 | -3.06353000 |
| H | 1.49338400  | -3.75911400 | -1.70690100 |

**xix**

E (M06-D3-CPCM/BS1) = -2914.572727 au

H (M06-D3-CPCM/BS1) = -2913.690711 au

G (M06-D3-CPCM/BS1) = -2913.828516 au

E (M06-D3-SMD/BS2//M06-D3-CPCM/BS1) = -2915.83484904 au

|   |             |             |             |
|---|-------------|-------------|-------------|
| C | -1.41323500 | -3.65426600 | -1.31730500 |
| C | -0.88149100 | -2.42059000 | -0.95344900 |
| C | -1.52021500 | -1.22976200 | -1.31195900 |
| C | -2.68704800 | -1.30539700 | -2.08265800 |
| C | -3.20734100 | -2.53560900 | -2.46698600 |
| C | -2.57790500 | -3.71579200 | -2.07593300 |
| H | -0.90739900 | -4.56837400 | -1.00994900 |
| H | 0.02751100  | -2.38365500 | -0.35005100 |
| H | -3.19612800 | -0.38859800 | -2.37637000 |
| H | -4.11658800 | -2.57247800 | -3.06501200 |
| H | -2.99217200 | -4.67918600 | -2.36726000 |
| C | -1.00626500 | 0.08850800  | -0.79820400 |
| C | -1.83413900 | 0.68624500  | 0.34279900  |
| S | -4.32840900 | 1.27986000  | 0.99016700  |
| O | -4.40679700 | 1.50238900  | 2.42874000  |
| O | -4.12837600 | 2.39526300  | 0.07493300  |
| C | -5.73374600 | 0.34431500  | 0.47572200  |
| C | -6.57519500 | -0.21918600 | 1.42910400  |

|    |             |             |             |
|----|-------------|-------------|-------------|
| C  | -5.95737700 | 0.17217300  | -0.89023200 |
| C  | -7.66235300 | -0.96984200 | 0.99891800  |
| H  | -6.37722500 | -0.07131100 | 2.48869100  |
| C  | -7.04304100 | -0.58618100 | -1.29776500 |
| H  | -5.29291000 | 0.63382200  | -1.61869000 |
| C  | -7.91060400 | -1.16513300 | -0.36224900 |
| H  | -8.33051100 | -1.41666200 | 1.73405000  |
| H  | -7.22966300 | -0.73259400 | -2.36119400 |
| C  | -9.09469700 | -1.95814800 | -0.82099400 |
| H  | -9.91961500 | -1.29178500 | -1.10878000 |
| H  | -8.85268900 | -2.56675000 | -1.70064000 |
| H  | -9.46781700 | -2.62090200 | -0.03219100 |
| N  | -3.08204600 | 0.14782600  | 0.62941400  |
| C  | -3.27798200 | -1.21462800 | 1.14118800  |
| H  | -3.99417100 | -1.76937200 | 0.52442300  |
| H  | -2.31907400 | -1.73731900 | 1.13304100  |
| H  | -3.62892700 | -1.16875000 | 2.18123900  |
| C  | -0.44625100 | 3.03646000  | -0.88536400 |
| C  | -0.55260800 | 2.66634900  | 0.48975600  |
| C  | 0.15846200  | 3.41682700  | 1.45524700  |
| C  | 0.88889900  | 4.51511000  | 1.03041300  |
| C  | 0.92787300  | 4.93428000  | -0.31189200 |
| C  | 0.24664600  | 4.21620700  | -1.26113900 |
| C  | -1.00623900 | 2.27546100  | -1.92413200 |
| H  | 1.49064500  | 5.82246700  | -0.58678100 |
| H  | 0.26174500  | 4.50924300  | -2.30992600 |
| H  | -1.17214600 | 2.73324700  | -2.90225300 |
| C  | 0.09971900  | 3.01969300  | 2.89364500  |
| H  | -0.93240600 | 2.80497300  | 3.20057200  |
| H  | 0.68018500  | 2.10139700  | 3.06931900  |
| H  | 0.50995300  | 3.80211900  | 3.54053100  |
| N  | -1.49446300 | 1.77674200  | 0.92502200  |
| O  | -1.31678700 | 1.03586100  | -1.90770400 |
| H  | 1.43106400  | 5.09366500  | 1.77853300  |
| Au | 1.12304800  | 0.05608200  | -0.44110200 |
| P  | 3.52291700  | -0.06284900 | -0.54953400 |
| C  | 3.88957400  | -0.94048500 | -2.19932100 |
| C  | 4.19465600  | 1.70536400  | -0.43866000 |
| C  | 2.87582500  | -0.47322700 | -3.24957000 |
| H  | 3.08798700  | -0.99323100 | -4.19532000 |
| H  | 1.84320800  | -0.71646000 | -2.96048500 |
| H  | 2.92981200  | 0.60463500  | -3.44592000 |
| C  | 3.65390200  | -2.43159400 | -1.93950700 |
| H  | 2.66632200  | -2.61909000 | -1.49014300 |

|   |             |             |             |
|---|-------------|-------------|-------------|
| H | 3.68800100  | -2.96706400 | -2.89946100 |
| H | 4.41810000  | -2.86743400 | -1.28349700 |
| C | 5.29319400  | -0.73297100 | -2.76312600 |
| H | 6.08367200  | -1.07897800 | -2.08772100 |
| H | 5.38611000  | -1.32029200 | -3.68862300 |
| H | 5.48467700  | 0.31518800  | -3.02704800 |
| C | 3.59069800  | 2.51807400  | -1.58504800 |
| H | 2.49902800  | 2.39978600  | -1.65353800 |
| H | 3.79749200  | 3.58485700  | -1.41220900 |
| H | 4.03263300  | 2.25384900  | -2.55510400 |
| C | 3.67577300  | 2.24399200  | 0.89770900  |
| H | 4.00225300  | 3.28863300  | 1.01472700  |
| H | 2.57773000  | 2.23130800  | 0.94955000  |
| H | 4.07442600  | 1.67422300  | 1.74945500  |
| C | 5.71308900  | 1.87864900  | -0.45743100 |
| H | 6.18997800  | 1.44364100  | -1.34381400 |
| H | 5.93143700  | 2.95670300  | -0.46731400 |
| H | 6.18749500  | 1.46468500  | 0.43967100  |
| C | 4.42412700  | -1.05400300 | 0.71610000  |
| C | 3.77718900  | -1.83328600 | 1.69961600  |
| C | 5.82174400  | -1.14847500 | 0.60712200  |
| C | 4.55332200  | -2.67544700 | 2.50972900  |
| C | 6.57390500  | -1.97674800 | 1.42784000  |
| H | 6.34531100  | -0.57183500 | -0.14868000 |
| C | 5.93222400  | -2.75267100 | 2.38519600  |
| H | 4.04584300  | -3.27145800 | 3.26728700  |
| H | 7.65456000  | -2.01842200 | 1.30982100  |
| H | 6.50121400  | -3.41415700 | 3.03535000  |
| C | 2.31885300  | -1.86279700 | 1.98748500  |
| C | 1.62891500  | -3.07468800 | 1.86970000  |
| C | 1.65014800  | -0.75734000 | 2.52667900  |
| C | 0.31014300  | -3.18838100 | 2.29924900  |
| H | 2.14511400  | -3.93941200 | 1.45150400  |
| C | 0.33100300  | -0.87112400 | 2.96039200  |
| H | 2.18705300  | 0.18478300  | 2.64862800  |
| C | -0.33506500 | -2.09042300 | 2.86254900  |
| H | -0.20882600 | -4.14155200 | 2.20830700  |
| H | -0.17284600 | -0.01051100 | 3.40052900  |
| H | -1.35074200 | -2.18822100 | 3.24192200  |

**TS**<sub>xix-xx</sub>

E (M06-D3-CPCM/BS1) = -2914.54986084 au

H (M06-D3-CPCM/BS1) = -2913.668875 au

G (M06-D3-CPCM/BS1) = -2913.808286 au

E (M06-D3-SMD/BS2//M06-D3-CPCM/BS1) = -2915.8135703 au

|   |             |             |             |
|---|-------------|-------------|-------------|
| C | 1.36837600  | -1.10645700 | 4.80098000  |
| C | 0.79397200  | -0.29598500 | 3.83342200  |
| C | 1.50317800  | 0.05463600  | 2.67681500  |
| C | 2.80606000  | -0.42695400 | 2.51286600  |
| C | 3.37963000  | -1.23864400 | 3.48842700  |
| C | 2.66815600  | -1.58062800 | 4.63241700  |
| H | 0.79913100  | -1.36746000 | 5.69108800  |
| H | -0.22163900 | 0.07181400  | 3.98007100  |
| H | 3.39268200  | -0.13833200 | 1.64487500  |
| H | 4.39976800  | -1.59198700 | 3.35120800  |
| H | 3.12363800  | -2.21141500 | 5.39325700  |
| C | 0.91078600  | 1.10078000  | 1.78460500  |
| C | 1.38186300  | 1.51445700  | 0.43637600  |
| S | 3.23914200  | 1.44617700  | -1.48284800 |
| O | 2.48733300  | 1.40972000  | -2.73349400 |
| O | 3.76016800  | 2.69910300  | -0.95884700 |
| C | 4.57485300  | 0.29159800  | -1.59505100 |
| C | 4.65035100  | -0.57557300 | -2.67917500 |
| C | 5.53927900  | 0.28685300  | -0.58741700 |
| C | 5.71468900  | -1.46669900 | -2.74927100 |
| H | 3.88449300  | -0.55109800 | -3.45168100 |
| C | 6.58907000  | -0.61397700 | -0.67305300 |
| H | 5.46773800  | 0.98454300  | 0.24570500  |
| C | 6.69385100  | -1.49980800 | -1.75347300 |
| H | 5.78680200  | -2.15187800 | -3.59303900 |
| H | 7.34914100  | -0.63206000 | 0.10744600  |
| C | 7.85033100  | -2.44673900 | -1.84240300 |
| H | 8.75796500  | -1.92198400 | -2.17105800 |
| H | 8.07614300  | -2.89486800 | -0.86698600 |
| H | 7.65819900  | -3.25379300 | -2.55818200 |
| N | 2.32921000  | 0.69112500  | -0.22185000 |
| C | 1.97815100  | -0.70697500 | -0.50688900 |
| H | 2.87137700  | -1.34108000 | -0.47513800 |
| H | 1.29289000  | -1.07195000 | 0.26229500  |
| H | 1.48549100  | -0.80511000 | -1.48570100 |
| C | -0.97803000 | 3.19339400  | 1.12677500  |
| C | 0.00404500  | 3.45708800  | 0.13319400  |
| C | -0.19113400 | 4.54723700  | -0.75360900 |
| C | -1.34710100 | 5.29974900  | -0.62972800 |
| C | -2.33969600 | 4.99560200  | 0.31660300  |
| C | -2.17207400 | 3.93440000  | 1.18042500  |
| C | -0.66699700 | 2.19795900  | 2.10769200  |
| H | -3.23451000 | 5.61104900  | 0.37662300  |



|    |             |             |             |
|----|-------------|-------------|-------------|
| H  | -2.91280000 | 3.70845000  | 1.94644600  |
| H  | -1.39607400 | 1.88364700  | 2.86275500  |
| C  | 0.80577600  | 4.81027300  | -1.83543900 |
| H  | 1.82911700  | 4.85611600  | -1.44416300 |
| H  | 0.79695000  | 3.98991400  | -2.56782600 |
| H  | 0.57985800  | 5.74550300  | -2.35938700 |
| N  | 1.02594800  | 2.59883400  | -0.16660400 |
| O  | 0.63117100  | 2.23826600  | 2.55625900  |
| H  | -1.50036800 | 6.13864600  | -1.30796200 |
| Au | -1.11566200 | 0.16513400  | 0.83041300  |
| P  | -2.86848500 | -0.52214800 | -0.69676700 |
| C  | -4.54204700 | -0.11170900 | 0.11723700  |
| C  | -2.51380700 | 0.49633800  | -2.26758300 |
| C  | -4.37756300 | 1.14537700  | 0.97402600  |
| H  | -5.34379900 | 1.37944300  | 1.44365200  |
| H  | -3.65070200 | 0.98997500  | 1.78432000  |
| H  | -4.07028300 | 2.02376100  | 0.39299700  |
| C  | -4.88550500 | -1.27706200 | 1.04609900  |
| H  | -4.10893500 | -1.42867300 | 1.80929600  |
| H  | -5.81912800 | -1.03981900 | 1.57606300  |
| H  | -5.03585800 | -2.21978700 | 0.50551400  |
| C  | -5.69589200 | 0.12292100  | -0.85864200 |
| H  | -5.95387300 | -0.76490500 | -1.44574600 |
| H  | -6.58964300 | 0.38119600  | -0.27260500 |
| H  | -5.50848600 | 0.95938700  | -1.54309400 |
| C  | -2.68021400 | 1.98250800  | -1.95434400 |
| H  | -2.13747100 | 2.28512900  | -1.04996000 |
| H  | -2.26690900 | 2.56532800  | -2.79136400 |
| H  | -3.73267300 | 2.27501600  | -1.84197600 |
| C  | -1.04623600 | 0.22102400  | -2.61188100 |
| H  | -0.81284900 | 0.68533100  | -3.58111900 |
| H  | -0.36222500 | 0.65836200  | -1.87072300 |
| H  | -0.83093200 | -0.85518200 | -2.69721000 |
| C  | -3.36097600 | 0.15077400  | -3.49207900 |
| H  | -4.43856600 | 0.25751800  | -3.32005200 |
| H  | -3.09059300 | 0.85390300  | -4.29299500 |
| H  | -3.15991500 | -0.85944400 | -3.86625300 |
| C  | -2.96666500 | -2.27237300 | -1.26823700 |
| C  | -2.05245600 | -3.29045400 | -0.91971000 |
| C  | -3.98495700 | -2.58088400 | -2.18653500 |
| C  | -2.16382500 | -4.53765500 | -1.55392600 |
| C  | -4.09491900 | -3.82935600 | -2.78059700 |
| H  | -4.70931500 | -1.82354900 | -2.46614200 |
| C  | -3.16193400 | -4.81233600 | -2.47515900 |

|   |             |             |             |
|---|-------------|-------------|-------------|
| H | -1.45808000 | -5.31924800 | -1.27654700 |
| H | -4.90215900 | -4.02387000 | -3.48312600 |
| H | -3.22085600 | -5.79574500 | -2.93691100 |
| C | -1.00619500 | -3.21343300 | 0.12726700  |
| C | -1.34427800 | -2.95501700 | 1.46193100  |
| C | 0.30649600  | -3.59431500 | -0.17213000 |
| C | -0.39424000 | -3.08244300 | 2.47056300  |
| H | -2.37672600 | -2.71654200 | 1.71629000  |
| C | 1.25669800  | -3.71860600 | 0.83680700  |
| H | 0.57758200  | -3.80118700 | -1.20802500 |
| C | 0.90707200  | -3.46858700 | 2.16057700  |
| H | -0.67841100 | -2.89916500 | 3.50545300  |
| H | 2.27433100  | -4.01582100 | 0.58711000  |
| H | 1.64762500  | -3.56851500 | 2.95212100  |

**XX**

E (M06-D3-CPCM/BS1) = -2914.58879435 au

H (M06-D3-CPCM/BS1) = -2913.705316 au

G (M06-D3-CPCM/BS1) = -2913.846012 au

E (M06-D3-SMD/BS2//M06-D3-CPCM/BS1) = -2915.85250094 au

|   |             |             |             |
|---|-------------|-------------|-------------|
| C | 0.08733100  | -1.03998400 | -3.57872400 |
| C | -0.12703400 | 0.16423700  | -2.87901700 |
| C | -1.33887100 | 0.37442800  | -2.17331700 |
| C | -2.31556000 | -0.61717800 | -2.21593100 |
| C | -2.09524200 | -1.80199100 | -2.91934900 |
| C | -0.89541800 | -2.02829800 | -3.58214500 |
| H | 1.00575900  | -1.16594400 | -4.15054900 |
| H | 0.55219100  | 1.00333200  | -3.05127100 |
| H | -3.25878500 | -0.46540800 | -1.69633200 |
| H | -2.87876100 | -2.55678900 | -2.94576600 |
| H | -0.73332000 | -2.95720200 | -4.12429500 |
| C | -1.55565500 | 1.65737200  | -1.43449100 |
| C | -1.86327400 | 1.64690200  | 0.03546500  |
| S | -4.03285800 | 0.99934600  | 1.38144600  |
| O | -3.76364400 | 1.04224800  | 2.81578800  |
| O | -4.56559800 | 2.16860100  | 0.69529600  |
| C | -5.07546000 | -0.39132800 | 1.04915600  |
| C | -5.28856200 | -1.35216100 | 2.03134200  |
| C | -5.68000200 | -0.48646400 | -0.20478300 |
| C | -6.11681900 | -2.43186900 | 1.74433200  |
| H | -4.81502600 | -1.25004000 | 3.00577600  |
| C | -6.50035000 | -1.57062300 | -0.47167700 |
| H | -5.51689800 | 0.28912200  | -0.95217100 |
| C | -6.73155300 | -2.55691800 | 0.49688100  |

|    |             |             |             |
|----|-------------|-------------|-------------|
| H  | -6.29143600 | -3.19126800 | 2.50553400  |
| H  | -6.98044300 | -1.65697000 | -1.44607400 |
| C  | -7.63981400 | -3.70873400 | 0.19510100  |
| H  | -8.68801300 | -3.38130400 | 0.16468400  |
| H  | -7.41500000 | -4.14747000 | -0.78517100 |
| H  | -7.55978900 | -4.49692100 | 0.95197100  |
| N  | -2.63469000 | 0.54416000  | 0.51360800  |
| C  | -1.88427400 | -0.55556200 | 1.12244900  |
| H  | -2.55229300 | -1.41196600 | 1.27522800  |
| H  | -1.09520600 | -0.87310900 | 0.42781300  |
| H  | -1.42882200 | -0.26264800 | 2.08056300  |
| C  | -0.57153900 | 3.94389900  | -0.94038500 |
| C  | -0.91972400 | 3.74650400  | 0.40677600  |
| C  | -0.56013700 | 4.69246600  | 1.38357100  |
| C  | 0.16235500  | 5.81392700  | 0.97586600  |
| C  | 0.53039800  | 5.99824400  | -0.35468000 |
| C  | 0.16574100  | 5.06104600  | -1.31573300 |
| C  | -0.96407100 | 2.91893500  | -1.92388300 |
| H  | 1.09584200  | 6.88190200  | -0.64354500 |
| H  | 0.44167000  | 5.19934100  | -2.36081300 |
| H  | -0.40629300 | 2.91367700  | -2.86365200 |
| C  | -0.92329800 | 4.48424100  | 2.82070700  |
| H  | -1.99059100 | 4.26074500  | 2.93905800  |
| H  | -0.38027300 | 3.62979400  | 3.24851100  |
| H  | -0.68099600 | 5.37033500  | 3.41790600  |
| N  | -1.59167500 | 2.60123100  | 0.83697600  |
| O  | -2.35317400 | 2.64413100  | -2.09468000 |
| H  | 0.44514500  | 6.55667500  | 1.72140400  |
| Au | 1.33442000  | -0.53507600 | -1.16650800 |
| P  | 3.18047300  | -0.13672900 | 0.26925600  |
| C  | 4.66018300  | 0.19722100  | -0.87975800 |
| C  | 2.71317600  | 1.33573700  | 1.36381200  |
| C  | 4.15971200  | 0.93788400  | -2.12570200 |
| H  | 5.02264400  | 1.15134400  | -2.77283800 |
| H  | 3.45455100  | 0.32916500  | -2.70921800 |
| H  | 3.67608100  | 1.89433500  | -1.89248500 |
| C  | 5.19856300  | -1.16652900 | -1.31533500 |
| H  | 4.41701600  | -1.78288800 | -1.78269300 |
| H  | 5.98516000  | -1.00989100 | -2.06730800 |
| H  | 5.63623200  | -1.73174000 | -0.48344300 |
| C  | 5.78678600  | 1.02359400  | -0.25805400 |
| H  | 6.24922800  | 0.54741100  | 0.61331400  |
| H  | 6.57959700  | 1.13866400  | -1.01115900 |
| H  | 5.46164500  | 2.03296900  | 0.02226500  |

|   |             |             |             |
|---|-------------|-------------|-------------|
| C | 2.48630600  | 2.56275000  | 0.48169400  |
| H | 1.79850600  | 2.35684400  | -0.35312300 |
| H | 2.02698300  | 3.35483300  | 1.09317900  |
| H | 3.42164600  | 2.96695900  | 0.07316700  |
| C | 1.39100000  | 0.94936700  | 2.03087400  |
| H | 1.11443900  | 1.73260900  | 2.75302400  |
| H | 0.57545500  | 0.87594600  | 1.29918400  |
| H | 1.45664200  | -0.00217500 | 2.57942700  |
| C | 3.72525800  | 1.67190600  | 2.45887300  |
| H | 4.72279500  | 1.90888300  | 2.07118200  |
| H | 3.36266200  | 2.56310600  | 2.99102400  |
| H | 3.81616700  | 0.86657400  | 3.19726100  |
| C | 3.64295900  | -1.48864700 | 1.42572600  |
| C | 2.86222600  | -2.64572200 | 1.64048000  |
| C | 4.79524600  | -1.30417300 | 2.20735500  |
| C | 3.24297000  | -3.53285200 | 2.65697900  |
| C | 5.17121500  | -2.20957200 | 3.18880200  |
| H | 5.41498100  | -0.42432500 | 2.06109100  |
| C | 4.37894700  | -3.32640800 | 3.42558000  |
| H | 2.63331900  | -4.42086000 | 2.81933200  |
| H | 6.07407300  | -2.03354300 | 3.76921500  |
| H | 4.64940700  | -4.04228800 | 4.19899900  |
| C | 1.67091100  | -3.04967900 | 0.85129100  |
| C | 1.79407800  | -3.41635300 | -0.49576800 |
| C | 0.43317400  | -3.20562900 | 1.48088300  |
| C | 0.69944200  | -3.91464200 | -1.19718800 |
| H | 2.76841600  | -3.35079900 | -0.98116500 |
| C | -0.66080300 | -3.70594000 | 0.77852100  |
| H | 0.33236100  | -2.93608800 | 2.53300200  |
| C | -0.53260700 | -4.05685800 | -0.56200600 |
| H | 0.81871400  | -4.21028100 | -2.23838000 |
| H | -1.61619200 | -3.83038300 | 1.28602200  |
| H | -1.38530800 | -4.45668700 | -1.10842600 |
